# Supplementary material for: Low Abundance of Methanotrophs in Sediments of Shallow Boreal Coastal Zones With High Water Methane Concentrations
Source: Front Microbiol. 2020 Jul 7;11:1536. doi: 10.3389/fmicb.2020.01536 (PMC7362727; doi:10.3389/fmicb.2020.01536)
Supplement: Supplementary file 1 [file Table_1.XLSX]

## Sheet: Data S1
Sequencing facility sample ID	Sample name	Sample type	Million sequence pairs	Average read length (bp)	After quality trimming (Mil. seq pairs)	After quality trimming, avg. read length (bp)	After quality trimming, avg. phred score (R1)	After quality trimming, avg. phred score (R2)	SortMeRNA rRNA Mil. sequences	% rRNA sequences	SortMeRNA SSU rRNA Mil. sequences	Kraken2 Classified 16S rRNA sequences (SILVA)	PEAR merged sequences (Mil. reads)	% PEAR merged reads	Methylococcales classified InterPro proteins
P11921_101	2018 TZS-7 A	DNA	66.3	151	63.3	131	36.1657	36.1542	0.5	0.789889	0.3	31226	53	83.7283
P11921_102	2018 TZS-7 B	DNA	30	151	28.9	134	35.9553	35.7769	0.2	0.692042	0.1	13206	23.6	81.6609
P11921_103	2018 TZS-7 C	DNA	28.3	151	27.3	134	35.9395	35.7435	0.3	1.0989	0.2	14214	22.3	81.685
P11921_104	2018 TZS-10 A	DNA	29.5	151	27.4	125	35.9367	35.8106	0.2	0.729927	0.1	11222	23.3	85.0365
P11921_105	2018 TZS-10 B	DNA	23.3	151	21.9	127	35.9733	35.8806	0.1	0.456621	0.1	8753	19.2	87.6712
P11921_106	2018 TZS-10 C	DNA	30.8	151	29.3	131	35.9533	35.7818	0.1	0.341297	0.1	11143	24.2	82.5939
P11921_107	2018 TZS-11 A	DNA	63.6	151	60.4	130	36.2062	36.2009	0.2	0.331126	0.1	21267	49.7	82.2848
P11921_108	2018 TZS-11 B	DNA	35.4	151	33.9	131	35.9937	35.8582	0.1	0.294985	0.1	11563	28.7	84.6608
P11921_109	2018 TZS-11 C	DNA	45.4	151	42.9	129	35.9699	35.6498	0.1	0.2331	0.1	14719	36.2	84.3823
P11921_110	2018 TZS-12 A	DNA	27.2	151	26.4	135	35.9737	35.5511	0.1	0.378788	0	9170	21.7	82.197
P11921_111	2018 TZS-12 B	DNA	25.8	151	25.1	137	35.9611	35.4963	0.1	0.398406	0	8813	19.2	76.494
P11921_112	2018 TZS-12 C	DNA	25.4	151	24.9	139	35.9316	35.8702	0.1	0.401606	0	9467	17.3	69.4779
P11921_113	2018 TZS-13 A	DNA	49.9	151	48.1	134	35.92	35.8735	0.3	0.623701	0.2	22499	36.5	75.8836
P11921_114	2018 TZS-13 B	DNA	46.9	151	44.6	132	35.9127	35.8513	0.3	0.672646	0.2	18471	34.7	77.8027
P11921_115	2018 TZS-13 C	DNA	53.5	151	51	132	35.894	35.8656	0.3	0.588235	0.2	23728	39.8	78.0392
P11921_116	2018 TZS-15 A	DNA	38.9	151	36.3	126	35.9284	35.5891	0.3	0.826446	0.2	14796	31.2	85.9504
P11921_117	2018 TZS-15 B	DNA	39.8	151	37.8	131	35.9182	35.6562	0.2	0.529101	0.1	15326	29.3	77.5132
P11921_118	2018 TZS-15 C	DNA	24.9	151	23.7	133	35.9063	35.5909	0.2	0.843882	0.1	9955	18.2	76.7932
P11921_119	2018 TZS-16 A	DNA	37.2	151	35.8	133	35.9858	35.6444	0.1	0.27933	0.1	12887	29.5	82.4022
P11921_120	2018 TZS-16 B	DNA	38.9	151	37.7	136	35.9657	35.5336	0.1	0.265252	0.1	13231	29.7	78.7798
P11921_121	2018 TZS-16 C	DNA	37.6	151	36.5	137	35.9521	35.5477	0.1	0.273973	0	12727	28.1	76.9863
P11921_122	2017 TZS-005 A	DNA	29.2	151	28.1	136	35.899	35.5538	0.2	0.711744	0.1	12508	20.6	73.3096
P11921_123	2017 TZS-005 B	DNA	36.4	151	35.4	137	35.9088	35.585	0.2	0.564972	0.1	14188	24.9	70.339
P11921_124	2017 TZS-005 C	DNA	35.7	151	34.6	137	35.9142	35.5645	0.3	0.867052	0.2	15058	24.8	71.6763
P11921_125	2017 TZS-7 A	DNA	29.8	151	28.9	137	35.9082	35.6518	0.1	0.346021	0.1	12464	20.7	71.6263
P11921_126	2017 TZS-7 B	DNA	39.9	151	38.4	134	35.9295	35.7173	0.2	0.520833	0.1	16929	29.3	76.3021
P11921_127	2017 TZS-7 C	DNA	38.8	151	37.3	134	35.9466	35.5031	0.2	0.536193	0.1	16126	29.5	79.0885
P11921_128	2017 TZS-10 A	DNA	45.2	151	43.6	134	35.9581	35.6837	0.2	0.458716	0.1	16350	35	80.2752
P11921_129	2017 TZS-10 B	DNA	23.3	151	22.8	138	35.9473	35.7418	0.1	0.438596	0.1	8205	17.1	75
P11921_130	2017 TZS-10 C	DNA	38.7	151	37.6	137	35.909	35.5998	0.1	0.265957	0.1	14018	26.4	70.2128
P11921_131	2017 TZS-11 A	DNA	29.2	151	28.4	137	35.9095	35.6886	0.1	0.352113	0.1	9435	20.7	72.8873
P11921_132	2017 TZS-11 B	DNA	29	151	28.3	138	35.9258	35.6574	0.1	0.353357	0.1	9511	20.3	71.7314
P11921_133	2017 TZS-11 C	DNA	25.8	151	25.1	136	35.947	35.5894	0.1	0.398406	0	8568	18.5	73.7052
P11921_134	2017 TZS-12 A	DNA	54.8	151	53.8	137	36.2165	36.111	0.2	0.371747	0.1	18822	42.6	79.1822
P11921_135	2017 TZS-12 B	DNA	40.9	151	39.9	139	35.9617	35.5514	0.1	0.250627	0.1	14262	27.8	69.6742
P11921_136	2017 TZS-12 C	DNA	45.1	151	43.7	136	35.9687	35.6629	0.2	0.457666	0.1	15545	34.4	78.7185
P11921_137	2017 TZS-13 A	DNA	37.7	151	36.5	135	35.9679	35.6377	0.2	0.547945	0.1	14885	28.5	78.0822
P11921_138	2017 TZS-13 B	DNA	39.5	151	38.3	136	35.9409	35.5413	0.2	0.522193	0.1	15482	28.1	73.3681
P11921_139	2017 TZS-13 C	DNA	38	151	37.1	139	35.9251	35.5385	0.1	0.269542	0.1	13862	26	70.0809
P11921_140	2017 TZS-15 A	DNA	35.9	151	34.6	133	35.9701	35.6385	0.1	0.289017	0.1	10844	27.4	79.1908
P11921_141	2017 TZS-15 B	DNA	31.2	151	30.4	136	35.9517	35.6636	0.1	0.328947	0	9239	23.1	75.9868
P11921_142	2017 TZS-15 C	DNA	31.9	151	31	136	35.9557	35.6566	0.1	0.322581	0	9993	23.6	76.129
P11921_143	2017 TZS-16 A	DNA	42	151	40.7	137	35.9468	35.5783	0.1	0.2457	0.1	14357	29.5	72.4816
P11921_144	2017 TZS-16 B	DNA	48.7	151	46.7	131	35.9813	35.7297	0.1	0.214133	0.1	16433	38.7	82.8694
P11921_145	2017 TZS-16 C	DNA	48.7	151	46.8	133	35.9587	35.6699	0.1	0.213675	0.1	16361	36.1	77.1368
P12551_113	2018 TZS-7 A	RNA	82.5	151	82.1	143	36.6308	36.3833	75.8	92.3264	19.6	9798438	62.4	76.0049	2378
P12551_114	2018 TZS-7 B	RNA	83.8	151	83.4	144	36.6261	36.3957	75.6	90.6475	22.4	10084635	61	73.1415	3089
P12551_115	2018 TZS-7 C	RNA	87.9	151	87.6	147	36.6361	36.4147	75.2	85.8447	19.4	13090475	68.5	78.1963	2857
P12551_116	2018 TZS-10 A	RNA	85.2	151	84.7	143	36.6281	36.359	77.7	91.7355	17.2	10497583	64.2	75.7969	5082
P12551_117	2018 TZS-10 B	RNA	81.2	151	80.7	145	36.618	36.3282	72.2	89.4672	20.1	12645369	58.3	72.2429	5398
P12551_118	2018 TZS-10 C	RNA	82	151	81.5	142	36.6524	36.5165	74.5	91.411	23.6	10334897	66.2	81.227	3740
P12551_119	2018 TZS-11 A	RNA	87.1	151	86	139	36.6502	36.2106	78.4	91.1628	24.9	8722598	70.8	82.3256	67
P12551_120	2018 TZS-11 B	RNA	94.2	151	93.6	144	36.6256	36.3946	82.2	87.8205	22.8	12311401	69.3	74.0385	215
P12551_121	2018 TZS-11 C	RNA	90	151	89.4	146	36.6118	36.1467	77.6	86.8009	21.3	12494075	65.5	73.2662	234
P12551_122	2018 TZS-12 A	RNA	92	151	91.5	145	36.6456	36.4586	81.6	89.1803	22	14632115	70.5	77.0492	177
P12551_123	2018 TZS-12 B	RNA	90.7	151	90.2	145	36.6416	36.3401	79.6	88.2483	21.3	12666754	67.2	74.5011	166
P12551_124	2018 TZS-12 C	RNA	94.8	151	94.2	144	36.6262	36.378	82.9	88.0042	24.5	11535463	72.5	76.9639	212
P12551_125	2018 TZS-13 A	RNA	85.2	151	84.8	145	36.6237	36.3823	76	89.6226	21.2	9874713	62	73.1132	7302
P12551_126	2018 TZS-13 B	RNA	84.2	151	83.9	145	36.632	36.4495	75.3	89.7497	23.1	11701936	62.3	74.2551	8730
P12551_127	2018 TZS-13 C	RNA	85.1	151	84.6	144	36.6461	36.309	76.7	90.6619	22.1	10068180	64.8	76.5957	5242
P12551_128	2018 TZS-15 A	RNA	85.5	151	84.7	144	36.6071	36.0578	75.4	89.0201	18.6	9299063	60	70.8383	269
P12551_129	2018 TZS-15 B	RNA	85.1	151	84.7	145	36.6357	36.4461	75.1	88.6659	21.5	9131898	61.8	72.9634	478
P12551_130	2018 TZS-15 C	RNA	77.7	151	77.3	145	36.6318	36.3843	69.2	89.5213	18	8645108	54.6	70.6339	275
P12551_131	2018 TZS-16 A	RNA	97.8	151	97.2	145	36.624	36.2543	85.8	88.2716	24.4	14915773	69.8	71.8107	138
P12551_132	2018 TZS-16 B	RNA	86.8	151	86.3	146	36.6283	36.2956	77.5	89.803	19.7	13381800	61.9	71.7265	78
P12551_133	2018 TZS-16 C	RNA	93.8	151	93.4	146	36.6373	36.3909	83.2	89.0792	21.1	12914861	66.4	71.0921	98
MEGAHIT co-assembly of DNA samples information
Contigs	Average contig length (bp)	Min contig length (bp)	Max contig length (bp)	N50 (bp)
33857159	736	200	404134	6459870
Prodigal predictes pmoAB genes (detected and classified in the metagenome co-assembly)
Contigs	Average contig length (bp)	Min contig length (bp)	Max contig length (bp)	N50 (bp)
49	793	501	1356	19
Sample	RNA sequences, mapped counts against metagenome assembled pmoAB genes (both R1 and R2 pairs required to map)
2018 TZS-7 A	11764
2018 TZS-7 B	16304
2018 TZS-7 C	15360
2018 TZS-10 A	28578
2018 TZS-10 B	31826
2018 TZS-10 C	20308
2018 TZS-11 A	176
2018 TZS-11 B	470
2018 TZS-11 C	538
2018 TZS-12 A	292
2018 TZS-12 B	272
2018 TZS-12 C	290
2018 TZS-13 A	42656
2018 TZS-13 B	41204
2018 TZS-13 C	24526
2018 TZS-15 A	1138
2018 TZS-15 B	1834
2018 TZS-15 C	1168
2018 TZS-16 A	82
2018 TZS-16 B	38
2018 TZS-16 C	42

## Sheet: Data S2
Prodigal contig name	SUM for all samples	7 A	7 B	7 C	10 A	10 B	10 C	11 A	11 B	11 C	12 A	12 B	12 C	13 A	13 B	13 C	15 A	15 B	15 C	16 A	16 B	16 C	gene	BLAST hit in UniProtKB/Swiss-Prot	% of identical matches	alignment length	number of mismatches	e-value	bit score	Prodigal gene sequence
k141_1700181_6	44141	1885	2431	2157	4852	6134	4527	6	18	23	2	1	12	8359	8167	5073	104	299	87	4	0	0	pmoB	G1UBD1	71.256	414	119	0	619	ATGAAAACAATAAAAGACAAGATAGCTAAACTATCATTTGTCGCATTGCTTTTGGCTGTAACATCTGCGATGTTCTACACGCCTACAGCATCTGCACACGGTGAAAAGTCTCAAGCAGCGTTTATGCGTATGCGTACTATTCACTGGTTTGACCTTAACTGGTCTAAAGATGAAGTTGCAGTTAATGATACTGTGATAATTTCTGGTAAATTCCACGTTTTCGCTGGATGGCCTGAAACTGTTGATAAACCAGACGTAGCATTTTTGAACATTGGTATTCCAGGACCTGTATTTATTCGTGCAGGTTCTTGGATCGGTGGTCAATTAGTACCTCGTTCAGTTTCTCTTGAACTTGGTAATACTTATGATTTTAAAGTATTGTTAAAAGCACGTCGTCCA…
k141_1700181_5	29459	1273	1613	1880	3178	4087	3062	7	6	6	4	7	10	5185	5689	3186	52	137	74	2	1	0	pmoA	Q607G3	75.51	245	60	4.44e-142	401	ATGAGTGCATCTCAATCAGCTGTACGTTCACGTGCTGAAGCTGTACAAGTTTCACGTGCGTTGGACTGGATGATTCTCTTTACACTATTCACTGCTGTACTTGGTGGATATCATATTCACTACATGTTAACTGGTGGTGACTGGGATTTCTGGACAGATTGGAAAGATAGACGTTTATGGGTAACCGTAGCACCGATCGTTTCAATTACTTTTCCTGCTGCTGTTCAATCGATGCTTTGGTATCGTTACCGTCTACCTTTTGGTGCGGTAGTAGCAGTTATGGCTCTTATGATTGGTGAGTGGATTAACCGTTATTTGAACTTCTGGGGTTGGACTTATTTCCCAGTAAATTTCGTATTCCCATCTAACCTAGTTCCAGGTGCAATCGTTCTTGACGTT…
k141_1171322_1	25361	1085	1381	1171	3100	3524	1915	17	38	36	36	41	43	5459	4634	2484	120	143	120	6	2	6	pmoB	G1UBD1	68.681	364	114	0	533	ATGAAAATATTAAAAGACAAGGTTGCTAAATTATCCTTTGTCGCACTGCTGATTACTGTTACAGCAGCGATGTTTTACACTCCAACGGCATCTGCTCATGGTGAAAAATCGCAAGCCGCATTTATGCGTATGCGTACTATTCACTGGTTTGACCTGAACTGGTCAAAAGAAGAAGTTGCAGTTAACGATACAATGACAATTTCAGGTAAATTTTTCGTATTTAGCGGATGGCCAGAAACTGTTGATAAACCAGAAATATCTTTCTTGAACATTGGTATTCCAGGGCCTGTATTTATACGTGCAGGATCATGGATCGGTGGTCAATTAGTTCCACGTTCAGTTTCTTTGGAACTGGGTGAAACTTATGAGTTTAAAGTATTGTTGAAAGCACGTCGTCCA…
k141_13667928_3	22428	1078	1905	2658	2632	2727	1480	6	28	50	8	16	15	4146	3435	1936	54	104	138	6	0	6	pmoB	G1UBD1	68.357	414	131	0	605	ATGAAAATAATTAAAGACAAAGTTGCAAAACTGTCCTTTGTCGCACTGCTGATCACAATGACAGCAGCGATGTTTTATGCTCCTACAGCATCTGCTCACGGTGAAAAGTCTCAGGCTGCGTTTATGCGTATGCGGACAATTCACTGGTTTGATTTGAATTGGTCAAAAGAAGAAGTGGCGGTTAACGACACTATGACCATTTCAGGCAAATTCCTGGTATTTAAAGGTTGGCCAGAAACTGTTGATAAGCCTGAAGTATCGTTTTTGAACATTGGTATTCCTGGTCCAGTATTTATTCGTGCTGGTTCTTGGATTGGTGGTCAATTGGTTCCTCGTTCAGTTTCTTTGGAACTGGGTGAAGTTTACGAGTTCAAAGTTTTGTTGAAAGCACGTCGCCCA…
k141_13667928_2	14760	801	1287	1270	1845	1910	934	8	15	23	2	4	19	2459	2674	1328	52	57	67	4	1	0	pmoA	Q607G3	73.984	246	64	8.45e-140	395	ATGAGCGCATCTCAATCAGCTGTACGTTCACGTGCGGAAGCGGTACAAGTTTCCCGTACGTTCGACTGGATGATTCTTTTTACACTGTTCACAGCAGTTCTAGGTGGTTACCATATTCATTATATGTTGACTGGCGGTGACTGGGATTTCTGGACCGACTGGAAAGATAGACGTCTATGGGTAACCGTAGCACCTATCGTTTCTATTACATTCCCTGCGGCTGTTCAAGCATGCTTGTGGTGGAGATACCGTTTGCCAATCGGCGCAACTATTTCTGTAGTTGCTCTGATGTTAGGTGAGTGGATCAACAGATACATGAACTTCTGGGGTTGGACTTACTTCCCAGTAAACTTCGTATTCCCATCTAACCTGATCCCAGGTGCCATTGTTCTTGACGTT…
k141_14301173_1	14387	867	1144	803	1835	2059	1196	28	105	73	46	28	42	2165	2222	1337	116	162	132	9	8	10	pmoB	G1UBD1	68.827	324	101	3.54e-169	479	ATGAAAATAATAAAAGACAAAGTTGCGAAACTATCCTTTGTCGCACTGCTGATTACTGTTACAGCAGCGATGTTTTATACACCAACTGCATCTGCTCATGGTGAAAAGTCGCAAGCCGCTTTCATGCGTATGCGTACAATTCATTGGTTTGACCTGAACTGGTCAAAAGAAGAAGTGGCTGTTAACGATACAATGACAATTTCAGGTAAATTTTTCGTATTTAGCGGATGGCCTGAAACTGTTGATAAACCAGAAATCTCTTTCTTGAACATTGGTATTCCAGGTCCTGTTTTTATTCGTGCAGGATCATGGATCGGTGGTCAATTAGTTCCACGTTCAGTTTCTTTGGAGCTGGGTGAAACTTATGAGTTTAAAGTATTGTTGAAAGCGCGTCGTCCA…
k141_33473315_1	12501	565	654	678	1396	1722	1209	3	36	19	32	36	24	2396	2233	1244	74	112	64	0	4	0	pmoB	G1UBD1	70.26	269	80	3.58e-126	367	GAACTGGGTGAAACTTATGAGTTTAAAGTATTGTTGAAAGCACGTCGTCCAGGTGACTGGCACGTTCACACTATGATGAACGTGAAAGGCGGTGGTCCAATCATCGGTCCAGGTAAATGGGTAACCATTACTGGTTCTATGGGATCATTTGTTAACCCTATTACTACTTTGACAGGCGAAACAGTTGACCTGGAAGATTATAACCTGGGTAATATTTACTTCTGGCATGGCTTGTGGTACGGTCTTGGATTACTTTGGATGGCATACTGGATCCGTAAACCTGTATTCGTTCCACGTTTGATTGCTATGCAAGCTGGTAAAGCAGATTCATTGATTAGCGCTACTGACAGAAAGGTTGCTTTGGGTTTTGCTGTAGGTACTATCGCAATTGTTGCTATG…
k141_13459934_1	12148	525	774	816	1515	1800	1000	11	38	56	32	32	20	2193	1784	1155	94	144	144	8	4	3	pmoB	G1UBD1	66.359	217	73	2e-111	328	GGCATTGGTTTACTTTGGATGGCATATTGGGTCCGTAAACCAATCTTTGTCCCGCGTTTAATTGCTATGGATGCGGGTAAAGCAGATTCACTGATTACTGCTACTGACAAAAAAGTTGCTTTGGGTTTTGCTGTAGGTACAATCGCAATTGTTGCCATGTCAATGGCTAGCACAAACGAGCAGTTCCCTATTACGACTCCTCTGCAAGCCGGTTTGTTACGTGGTATTAAATCAATTGAAATGCCAGTACCAACTATTGCTGTTAAAATTGAAGATGCAACTTATCGTGTGCCAGGTCGTGCAATGCAAATGACCATGACTGTCACTAACAATGGTGATTCAGCTGTTCGTTTAGGTGAATTCAACACTGCTGGTGTACGTTTCATGGATGCTGCTGTT…
k141_21480489_1	10561	601	720	187	1354	1621	960	19	70	57	54	22	41	1603	1690	1142	121	148	136	7	4	4	pmoB	G1UBD1	65.984	244	83	5.54e-119	348	ATGAAAATATTAAAAGACAAGGTTGCTAAATTATCCTTTGTCGCACTGCTGATTACTGTAACAGCAGCGATGTTTTATACGCCAACTGCATCTGCTCATGGTGAAAAATCGCAAGCCGCTTTTATGCGTATGCGTACAATTCACTGGTTTGACCTGAATTGGTCAAAAGAAGAAGTGCCAGTTAACGATACAATGACAATTTCAGGTAAATTCTTCGTATTTAGTGGATGGCCTGAAACTGTAGATAAACCAGAAATCTCTTTCTTGAACATTGGTATTCCAGGCCCTGTATTTATTCGTGCAGGATCTTGGATCGGTGGTCAATTAGTTCCACGTTCAGTTTCTTTAGAACTGGGTGAAACTTATGAGTTTAAAGTATTGTTGAAAGCACGTCGTCCA…
k141_2984014_1	10186	451	654	843	1272	1259	712	14	11	22	22	25	12	1951	1747	999	56	95	34	3	2	2	pmoA	Q607G3	80	200	40	4.14e-122	348	CACATTCACTATATGTTAACCGGTGGTGACTGGGATTTCTGGACTGACTGGAAAGATAGGCGTCTATGGGTAACTGTAGCTCCAATCGTTTCAATCACTTTCCCTGCTGCTGTTCAAGCGTGCTTGTGGTGGCGTTATCGTTTGCCTTTTGGCGCAGTAGTTTGTATTTTAGGCCTGCTTTTAGGTGAGTGGATCAACAGATACTTGAACTTCTGGGGCTGGACATATTTCCCAGTAAATTTCTGTTTCCCATCAAACCTGATGCCAGGCGCTATCGTACTTGATGTTATCCTGATGTTGACTGGCAGTATGACAGTGACCGCAGTTGTTGGCGGTTTGGCATGGGGTCTGTTGTTCTATCCAGGTAACTGGCCAATCATTGCTCCATTACATGTTCCT…
k141_25864827_1	9336	397	621	455	1272	1288	757	6	23	38	3	13	6	1857	1570	880	21	71	47	10	1	0	pmoA	Q607G3	75.148	169	42	5.36e-94	275	ATGAGCGCATCTCAATCAGCTGTACGTTCACGCGCTGAAGCAGTAAAATGTTCACGCACGTTCGATTGGCTAATTTTGTTTACATTGTTCTTCGTTGTACTTGGTGGTTATCACATTCACTATATGTTAACCGGTGGTGACTGGGATTTCTGGACTGACTGGAAAGATAGGCGTCTATGGGTAACTGTAGCTCCAATCGTTTCAATCACTTTCCCTGCTGCAGTTCAAGCGTGCTTGTGGTGGCGTTACCGTTTGCCTTTTGGCGCGGTAGTTTGTATTTTAGGCCTGCTTTTGGGTGAGTGGATCAACAGATACTTGAACTTCTGGGGTTGGACATATTTCCCAGTAAATTTCTGTTTTCCATCAAACCTGATGCCAGGTGCTATCGTACTTGATGTT…
k141_33591253_3	8770	626	792	575	1220	1234	776	0	6	4	0	2	0	1103	1338	998	24	46	26	0	0	0	pmoB	G1UBD1	69.324	414	127	0	596	ATGAAAACAATAAAAGACAGGATCGCGAAGTGGTCCTTTGTCGGACTATTGATGACTTTGGCTGTAGCAACAATGTACACACCGACAGCGTCGGCTCACGGTGAAAAATCGCAGGCTGCGTTTATGCGTATGCGTACGATTCACTGGTACGATCTGAATTGGTCAAAAGAGTCAGTAGCAGTTAACGAGCAAGTTGAGATTACAGGTAAGCTGTATGTATTCGAAGGCTGGCCAGAAACAGTAGACATCCCGGAAGTTGCGTTCCTGAACATTGGTATTCCAGGACCAGTATTTATTCGTTCTGAATCCTACATCGGTGACAAACTGGTGCCACGTTCGGTTCGTCTGGAACTGGGTAAAGTTTACGCATTTCGTGTTGTACTGACCGCGCGTCGTCCA…
k141_19777991_1	6366	367	417	220	746	704	536	3	26	10	1	0	5	1292	1222	639	40	91	35	12	0	0	pmoA	Q607G3	78.761	226	48	2.84e-136	385	ATGAGCGCATCTCAATCAGCTGTTAGGTCTCGTGCAGAAGCGGTAAAGTGTTCGCGCACGTTTGACTGGATGATTTGTTTTACATTGTTCTTCGTAGTACTTGGCGGTTATCACATTCACTACATGTTGACTGGTGGTGACTGGGATTTCTGGACCGACTGGAAAGATAGACGTCTATGGGTTACTGTAGCGCCAATCGTTTCAATCACTTTCCCTGCCGCTGTTCAATCAATGCTGTGGTATCGCTATCGTCTGCCTTTCGGTGCAGTTCTTTGTATATTAGGTCTGCTCTTGGGTGAGTGGATCAACAGATACTTGAACTTCTGGGGCTGGACATATTTCCCAGTTAATTTTGTGTTCCCATCAAATCTGATGCCAGGCGCTGTCGTACTTGACGTT…
k141_4792318_1	6286	310	477	327	909	942	527	3	20	43	25	14	10	1002	815	679	55	80	47	1	0	0	pmoA	Q607G3	76.471	221	52	9.11e-121	345	ATTTTGTTTACATTGTTCTTCGTTGTACTTGGTGGTTATCACATTCACTATATGTTAACCGGTGGTGACTGGGATTTCTGGACAGACTGGAAAGATAGACGTCTATGGGTAACCGTAGCGCCAATCGTTTCAATCACTTTCCCTGCTGCTGTTCAAGCTACTTTGTGGTATCGTTACCGTTTACCATTTGGTGCTGTAGTTTGTGTCTTAGGTTTGCTTTTAGGTGAGTGGGTCAACAGATACTTGAATTTCTGGGGCTGGACTTATTTCCCAGTAAACTTCTGCTTCCCATCAAACCTGATGCCAGGCGCTATCGTACTTGATGTTATCTTGATGTTATCAGGAAGTATGACACTAACCGCAGTTATTGGCGGTTTAGCATGGGGTCTGTTGTTCTAT…
k141_21744941_1	5241	262	350	109	759	761	415	14	29	62	2	5	0	713	831	616	132	123	44	2	2	10	pmoB	G1UBD1	73.101	316	85	4.26e-171	484	ATTCGTGCAGGATCATGGATCGGTGGTCAATTGGTGCCGCGTTCAGTTTCGTTGGAATTGGGTGAGACTTATGACTTTAAAGTATTGTTGAAAGCACGTCGTCCAGGCGACTGGCACGTTCATACTATGATGAACGTTAAAGGCGGTGGACCAATCATCGGTCCAGGTAAATGGGTAACTATTACTGGATCAATGGGTTCATTTACTAACCCGATTACTACGTTGACAGGCGAAACTATTGACCTGGAAACTTACAATTTGGGTAACACTTACTTTTGGCATGCTGTGTGGTACGGTATCGGTTTACTCTGGATGGCATACTGGTGCCGTAAACCAATTTTTATTCCACGTATAATTGCTGTTGACGCGGGTAAAGCTGATTCATTAATTAGTGCTGGT…
k141_11719740_3	4999	250	473	439	576	694	341	9	0	0	0	0	2	842	899	430	14	11	19	0	0	0	pmoB	G1UBD1	70.531	414	122	0	624	ATGAAAATAATAAAAGACAAGGTTGCTAAATTATCCTTTGTCGCACTGCTGGTATCATTAACAGCAGCGATGTTTTACACACCAACTGCATCTGCTCATGGTGAAAAATCGCAAGCGGCATTTATGCGTATGCGTACAATTCACTGGTTTGATCTTAACTGGTCAAAAGATACAGTAGCAATCAACGAGACAATGACTATTTCTGGAAAATTTCACGTTTTCCAAGGATGGCCAGAGACTGTTGATAAACCTGATATTTCTTTCTTGAACATCGGTATTCCTGGACCAGTATTTATTCGTGCTGGATCTTGGATTGGTGGTCAATTAGTTCCACGTTCTGTACAGTTGGAATTAGGCGAGACTTATGAGTTTAAAGTATTGTTGAAAGCGCGTCGTCCA…
k141_13144881_3	4692	269	368	354	671	549	230	0	0	2	0	0	0	769	909	516	9	40	6	0	0	0	pmoA	Q607G3	74.797	246	62	4.53e-140	395	ATGAGCGCATCTCAATCAGCTGTACGATCTCGTGCGGAAGCGGTACAAGTTTCCCGCACGTTTGACTGGATGATTCTTTTTACAGTATTTACTGCGATTCTTGGTGGGTATCATATTCACTATATGTTGACTGGCGGTGACTGGGATTTCTGGACTGACTGGAAAGATAGACGTTTATGGGTAACTGTAGCACCTATCGTTTCTATCACATTCCCTGCTGCTGCTCAAGCATGGTTGTGGTGGAAATTCCGTTTACCAGTTGGTGCAACTATTTCTGTTTTTGCATTAATGTTAGGTGAGTGGATTAATAGATATTTAAATTTCTGGGGTTGGACTTATTTCCCAGTAAATATTTGTTTCCCATCTAACCTAATCCCAGGTGCTATTCTTCTTGACGTA…
k141_33591253_2	4638	315	486	310	840	574	332	0	0	0	1	0	2	488	767	463	3	40	17	0	0	0	pmoA	Q607G3	81.377	247	46	4.91e-155	433	ATGAGCGCAACATCATCCGCGGTTCGGTCACATGCTGAAGCGGTTCAAGTTTCAAGAACGATCGATTACATGGGTATCTTTATACTGTTTTTCGCAGTATTGGGTGGATACCACATCCACGCAATGTTGACCATGGGTGACTGGGATTTCTGGGCTGACTGGAAAGATCGTCGTCTATGGGTAACAGTAACACCAATTGTTTGTGTAACATTTCCTGCAGCGGTTCAAGCGTTCGCATGGGAGCATTTCCGTCTTCCATTCGGCGCAACAATGTGTATCCTCGGCCTGCTTTTAGGCGAGTGGGTAAACCGCTATTTCAACTTCTGGGGCTGGACCTACTTCCCAATCAACTTCGTATTTCCTTCGCAGATGATTCCGGGAGCGATTCTGCTCGACGTT…
k141_6111557_2	4333	223	258	281	396	561	394	9	14	22	4	8	4	836	750	456	42	51	17	3	4	0	pmoB	G1UBD1	67.956	181	58	2.04e-84	258	GTTCCACGTTCAGTTTCTTTGGAACTGGGTGAAACTTATGAGTTTAAAGTATTGTTGAAAGCACGCCGTCCAGGTGACTGGCACGTTCACACTATGATGAACGTAAAAGGCGGTGGTCCAATCATCGGTCCAGGTAAATGGGTAACTATTACTGGCTCTATGGGATCTTTTGTTAACCCGATTACTACTTTGACAGGCGAAACTATCGATCTGGAAGATTATAATCTGGGCAACATCTACTTCTGGCACGCTTTGTGGTACGGTATTGGGATACTCTGGATGGCATACTGGATGCGTAAACCAATGTTTGTTCCACGTTTAATTGCTGTTGACGCTGGTAAGGCTGATTCATTGATTTCCGCTGGTGACAGAAAAGTTGCATTGGGTTTTGGAGTAGGT…
k141_11028241_1	3916	186	214	26	394	436	231	0	0	2	6	0	1	992	882	504	8	24	10	0	0	0	pmoB	G1UBD1	66.436	289	97	1.04e-142	410	ATGAAAACAATTAAAGACAAGGTAGCTAAACTATCATTTGTCGCTTTGCTAATGGCATTAACATCAGCGATGTTCTATACGCCTACTGCATCTGCACATGGTGAAAAGTCTCAAGCAGCGTTTATGCGTATGCGTACTATTCACTGGTTTGACCTTAACTGGTCAAAAGATGAAGTTGCTGTTAATGATACTATGACAATTTCTGGTAAATTCCACGTTTTCGCTGGATGGCCTGAAACTGTTGATAAGCCTGAAGTATCTTTCTTGAACATCGGTATTCCTGGTCCTGTATTTATTCGTGCAGGTTCTTGGATCGGTGGTCAATTAGTTCCACGTTCTGTTTCTTTAGAACTTGGCGATACTTATGAGTTCAAAGTATTATTAAAAGCACGTCGTCCA…
k141_12086400_1	2983	169	309	184	289	377	332	25	18	31	28	32	29	426	356	214	34	52	67	7	4	0	pmoB	G1UBD1	68.394	193	61	1.95e-98	294	ATAGCTATGGATGCGGGTAAAGCAGATTCATTGATTACAGCTACTGATAAAAAGGTTGCTTTGGGTTTTGCAATAGGTACTATCGCAATTGTTGCTATGTCAATGGCTAGCACAAACGAAAAGTATCCAATCACAACACCTTTACAAGCTGGTTTATTACGTGGCATTAAATCAATAGAAATGCCAGTGCCAACTATTGCTGTTAAAATCGAAGACGCAACTTATCGCGTTCCAGGTCGTGCAATGCAAATGACCATGACTGTCACTAACAATGGTGATTCAGCTGTCCGTTTAGGTGAATTCAACACTGCTGGTGTACGTTTCTTGGATGCTGCTGTTGCACAAGATGAATCAGGCTATCCTGATGACTTGTTGGCCGAAGAGGGTTTGACTGTTAGC…
k141_21597053_1	2935	206	199	182	353	360	221	9	22	15	15	13	28	393	442	349	53	41	24	2	6	2	pmoA	Q607G3	79.581	191	39	1.55e-116	333	TTCGTTGTACTTGGTGGTTATCACATTCACTATATGTTAACCGGTGGTGACTGGGATTTCTGGACTGACTGGAAAGATAGACGTCTATGGGTAACTGTGGCGCCAATCGTTTCAATCACTTTCCCTGCTGCTGTTCAAGCAACTTTATGGTACCGTTACCGTTTGCCTTTTGGCGCGGTGGTTTGTATTTTAGGTCTGCTCTTGGGTGAATGGGTCAACAGATACTTAAATTTCTGGGGTTGGACATATTTCCCAGTAAACTTCGTATTCCCATCAAACCTGATGCCAGGTGCCATTGTTCTTGATGTTATTTTGATGTTATCAGGAAGCATGACACTAACTGCAGTTATTGGTGGTTTAGCATGGGGTCTGTTGTTCTATCCAGGTAACTGGCCAATC…
k141_1927868_1	2134	41	67	96	259	208	146	5	0	2	0	0	0	556	433	310	0	11	0	0	0	0	pmoA	Q607G3	77.934	213	47	1.04e-125	358	ATGAGTGCATCTCAATCAGCTGTACGCTCTCGCGCTGAAGCGGTTCAAGTTTCACGTGCGTTAGACTGGATGATTCTCTTTACATTATTCACTGCTGTACTTGGTGGGTATCATATTCATTACATGTTAACTGGTGGTGACTGGGATTTCTGGACAGATTGGAAAGATAGACGTCTATGGGTAACTGTAGCGCCAATCGTATCAATCACTTTCCCTGCTGCTGTTCAGTCAATGTTGTGGTTTCGTTACCGTCTGCCTTTTGGTGCGGTAGTTTGTGTTCTTGCTCTTATGTTAGGTGAGTGGATCAACAGATATTTAAACTTCTGGGGTTGGACTTATTTCCCAGTAAACTTCTGTTTCCCTTCTAACTTAGTTCCTGGTGCTATTCTTCTTGATGTT…
k141_16343063_1	1737	54	156	324	178	174	68	0	0	1	0	1	1	346	227	195	4	6	2	0	0	0	pmoB	G1UBD1	63.547	203	74	1.52e-89	271	AAATGGGTAACTATTACTGGTTCTATGGGGACTTTTGTGAATCCAATCGTAACATTGACTGGTGAAACTATCGACTTAGAAACTCATGGCTTGAGCAATGTTTATTTTTGGCATGCTTTCTGGTATGCAATTGCTACGGCTTGGTTGTTGTTCTGGATTAAACGTCCAATGTTTATTCCACGCCACATTGCAGTAAGCGGTGGTAAAGCTGATACTTTAATTTCAGCTGGTGATAAGAAAGTTGGTATTGCTTTTGCAGTAGCTACTGTTGCTATTGTTGCAGGAGCCATGGGTTCTACTAACGAAAAGTACCCAGTAACTACTCCACTTCAAGCTGGTTTGATGCGTGGTATCAAAGCAATTGAAATGCCAACACCATCTATTGCTGTAAAAGTTGAA…
k141_11567129_1	1701	150	181	397	103	140	64	0	5	4	0	6	0	190	273	156	12	13	5	0	2	0	pmoB	G1UBD1	65.072	209	73	5.98e-103	306	GGCGAAACAATCAACCTAGAAACATACAACTTAGATAATACCTATATGTGGCATGCAATATGGTACGCTATTGGTTTGGCTTGGTTATTTTACTGGGCTCGTAAACCAATGTTCGTTCCACGTTCTATTGCTGTTGAAGCAGGTAAAGCTGATTCTTTAGTTACTTCTGCTGATAAAAAAGTAGGTTTAGCATTTGGTGTTGGTACATTAGTTATCGTTGCTGCTAGTATGGCTTCAACTAACGAAAAATATCCTATCACAACTCCTTTGCAAGCTGGTTTGTTGCGTGGAATGAAATCAATCGAAATGCCTGCTAGAACTATTAGCGTTAAGGTTGACGATGCTACATACCGTGTACCAGGTCGTGCGATGCAAATGACTCTGACTATCACTAACAAT…
k141_26599710_1	1268	128	141	129	64	120	56	0	0	0	0	0	0	247	263	116	0	4	0	0	0	0	pmoB	G1UBD1	71.921	203	57	2.72e-105	311	ACTGTTACAGCAGCGATGTTTTACACACCAACTGCATCTGCTCATGGTGAAAAGTCGCAAGCCGCTTTCATGCGTATGCGTACTATTCATTGGTTTGACATGAATTGGTCAAAAGAAGAAGTAGCTGTTAATGACACAATGACAATTTCTGGTAAATTCTTTGTTTTTCAAGGATGGCCAGAAACTGTTGATAAGCCCGAAGTATCATTCTTAAACGTTGGTATTCCTGGTCCAGTATTTATTCGTGCTGGATCTTGGGTTGGCGGTCAATTGGTTCCACGTTCAGTTTCTTTGGAATTGGGCGAAACTTATGAGTTTAAAGTATTGTTGAAAGCACGTCGCCCAGGCGATTGGCATGTTCACTCTATGATGAACGTACAAGGCGGTGGTCCAATCATT…
k141_4766782_1	1225	102	193	157	145	150	64	1	0	1	0	1	0	130	167	103	5	5	0	1	0	0	pmoB	G1UBD1	73.418	158	42	1.28e-76	237	AGATTCTCTAGTAATAGAGGAGGATATATGAAAATAATAAAAGACAAAGTTGCTAAACTATCCTTTGTCGCACTGCTGACTAGCTTAACAGCAGCGATGTTTTACACGCCAACTGCATCAGCTCACGGTGAGAAATCACAGGCAGCTTTCATGCGTATGCGTACTATCCACTGGTTCGATTTAACTTGGTCAAAAGACGAAGTTGCTGTAAACGAAACAATGACTATTTCTGGTAAATTCCATGTTTTCGGTGGATGGCCAGAGTCTGTTGATAAACCAGATGTTGCTTTCTTGAACATCGGTATTCCAGGTCCTGTGTTTATTCGTGCAGGTTCTTGGATTGGCGGTCAGTTGGTTCCTCGTTCTGCATCTCTGGAATTAGGTGAGACTTATGAGTTC…
k141_11187458_1	1142	57	137	136	136	122	48	0	0	0	0	0	0	191	176	125	0	12	2	0	0	0	pmoA	Q607G3	73.988	173	45	8.25e-79	237	CAAGTTTCTCGTACGTTTGACTGGATGATTCTCTTTACGTTATTTACTGCCGTTCTTGGTGGTTATCACATCCATTATATGCTAACTGGCGGTGACTGGGATTTCTGGACGGATTGGAAAGATAGACGTTTATGGGTAACTGTAGCACCTATCGTTTCAATTACGTTCCCAGCTGCTGTTCAAGCATGTTTGTGGTATCGTTACCGATTGCCTTTCGGTGCCGTTGTTTCTGTTTTAGCATTGTTGTTAGGTGAGTGGATTAACAGATATTTGAACTTCTGGGGTTGGACATATTTCCCAGTTAATTTCTGTTTCCCATCAAACTTGATTCCTGGAGCTATTGTTCTTGATGTTGTGTTAATGCTTTCAAGCAGCTTAACTGTTACTGCTGTTGTTGGT…
k141_22458834_1	910	134	159	0	47	62	46	0	2	0	0	0	0	159	210	89	2	0	0	0	0	0	pmoA	Q607G3	73.913	184	48	2.18e-92	272	ATGAGCGCATCTCAATCAGCTGTACGTTCACGCGCTGAAGCAGTAAAAGTTTCTCGCGCGTTCTATTGGGTCATTTTGTTTACATTGTTCTTCGTTGTACTTGGTGGTTATCACATTCACTATATGTTAACTGGTGGTGACTGGGATTTCTGGACTGACTGGAAAGATAGACGCTTATGGGTAACCGTAGCTCCAATCGTTTCAATTACATTCCCTGCTGCTGTTCAAGCGTGTTTATGGTGGCGTTACCGTTTACCTTTCGGCGCGGTAGTTTGTGTTTTAGGTCTGCTTTTAGGTGAGTGGGTCAACAGATATATGAACTTCTGGGGATGGACATATTTCCCAGTAAACTTCTGCTTCCCATCAAATTTAATGCCAGGTGCTATCGTTCTTGATGTT…
k141_21148815_1	851	79	111	54	75	85	64	0	0	0	0	0	0	188	105	90	0	0	0	0	0	0	pmoB	G1UBD1	71.134	388	112	0	583	ATGAAAATGATAAAAGACAGGTTTGCTAAATTGTCCTTCGTTGCACTGTTGATGTCACTTACAGCTTCTGTGTTTTATGCACCGACAGCTTCAGCACATGGTGAAAAATCTCAGGCTGCGTTTATGCGTATGCCTACCATTCATTGGTTCGATCTCAACTGGTCAAAAGACTCTGTTGCAGTTAACGATACAATGACCATTTCTGGTAAATTCCATGTTTTCGCTGGATGGCCAGAAACAGTTGATAAGCCAGAAGTTGCTTTTTTGAACATTGGTATTCCAGGGCCTGTATTTATTCGTGCAGGGTCTTGGATCGGTGGTCAATTAGTTCCACGTTCAGTATCATTAGAATTGGGCGAAACTTATGAGTTTAAAGTATTGTTGAAAGCACGTCGTCCA…
k141_14689416_4	17	0	0	0	2	0	0	2	0	2	0	0	0	6	0	0	0	0	2	2	0	1	pmoB	G1UBD1	44.472	407	218	2.09e-107	326	ATGAGCGCCATCAGTCGAGTTCTTCTGTGCCTCGTTGGCGCCGTGACGAGTCTCGTTGCCATCGCACCCCAACCCGTGCTCGCTCACGGCGAGCGAGCGACCGAGCCCTACATTCGCACCCGCTCCATTCAATGGTATGACGTGAACTGGTCGACGGGAAAAATCGGCGTCAATGACACGGTCACCGTCACCGGCAAGTTTCATCTGATGAATGACTGGCCCGAAGCGGTTGCCACCCCGGATCTGGTGTTCATGTCGAATGCGTCACCGGGCGCGGTGCTCACGCGGGTCGAGTCATATATCGGCGAAGTCCCGGCCCAGCAGTCCATCAAGGGCCTCCAACTGGGCCACGATTACACCTTCAAACTGGTGATGAAAGGGCGCATTCCCGGTCGCTGG…
k141_16415737_6	4	0	0	0	0	0	0	0	0	0	0	0	0	0	0	0	2	2	0	0	0	0	pmoA	Q607G3	35.616	219	138	7.59e-46	157	ATGGCAGACGCAACAGCAACGGTCGCAGATCTCGCGGTCGAGGCCGAAAAGCAAAAACGGCTCGAACTCAAGGCTCTCCTCGAAAAAAAATATAAATGGATTGATTGGAAGTGGGATCTCATTTTCTGGACCACTGCCATCTTCGTGGTCGCTGGTGCGGCGGATATTACCAAGCAACTATTTGCTGGTGACTGGGACTTCTGGACTGACTGGAAAGATCAGCAGTGGTGGCCGGTGATCACGGCCTTTGCCACGATCATTATTCCGTCGGCGCTTCAGTATATTCAGTGGGTCGCCTGGCGGTTTCCAACTGGGGCGACGTATACTGCTTGCTGTCTGTTTATGGCGGCCTGGGTTGGACGCTATTTCCAGTGGGACCTGGCAGTAACCTATCCGATG…
k141_17032633_2	2	0	0	0	0	0	0	0	0	0	0	0	0	0	2	0	0	0	0	0	0	0	pmoA	Q607G3	30.882	68	47	0.000333	43.9	ATGCCTGCACCGAAACTGCTACTGCATCCGGCCGATCCTGACACGGCAGCCGTTCCGGAGGACAGGCTTGCGCAGGAATTGCAGGCCATCGGCCTGATCGCAGCACGGATGCCACTGGAAAAGACCGCGTTCTACCCCGTCGGGGAGCACTTCCTGCAACTCGTTACCTTCCTTGGCTGCTCTCCCGCCATCGAACTCGACCCTCCAGGCGACCCGCAGGAACTGGAGCAGGCCAGCGCCGCAGGCCGGTTTTGCCATATCTTTATCGACTCCGGGGAGCAACTGCGGTTCCGCGGCGACAGCCAGACACAAACGCCACGCTGCCCCCGCTGCCGCAGCCCGGAACCCGACTGGAAAGCAGGACTGCAGTCATGGCAGGAGGGAAAACACAAGCCTGAC…
k141_18277371_1	1	0	0	0	0	0	0	0	0	1	0	0	0	0	0	0	0	0	0	0	0	0	pmoB	G1UBD1	28.535	396	273	1.13e-45	165	ACGACGATCAATGCCTCTCCAGTCTTTGCCCACGGGGGAGCCGCTGATGAGCCGTTCCTGAAAAATATGACGACAGCGTTTTTCGATGTGTCTATTTCTCCGACCAGAATCCAAGTCGGCGATCCTGTCACGATCACTGGTAAGGTCAAGGTCCTGGAAACCTGGCCGCATACGCTGGAGACACCAGAGATTGCCTCTATCGTTCCCGTGGTCCCTGGACCGAAGTTTATGCTCAAAGAGCGGACGGTGAACGGGGAATCTTCGATTGGTTCGTTTTTTGTTGAAAAGGGTGGGATTTACGAATTTCGGATGCTGCTTATTGGGAAAGAGCCGGGGGATTGGCACGTCCATCCTGGGATTGGCCTTCAGGGAACGGGAACGCTCCTCGGCCCGGGAGAA…
k141_13764245_1	0	0	0	0	0	0	0	0	0	0	0	0	0	0	0	0	0	0	0	0	0	0	pmoB	G1UBD1	41.86	258	141	4.02e-53	180	CGCGCGCAACAAGCCAGCACGCGTATGCGCACGATCAACTGGTACGACGTTGAAATCACCCCGGCTAACGTCACAGTCGGTGAAAAGGTCACGGTAAAAGGCCGATTTCGCACGTCAACTCAATGGCCAGAGGAAATCCCCTCCGTCGACGATCGCGTTTTTTTAAACGTTGGCACCGCAGGACCAAATTTCATCCGACTCGCGGCGAATATCGATGGGGTAAGTGCCGTTCAATCGACGTCGCTTGAACTCGGCAAGGATTACAGCTTCGAGATTCTCTTGAAAGCCCGCAAGCCGGGACGTTTTCACGTGCATCCTATCCTTAACGTGAGGGATGCCGGCGGCATGGTCGGACCCGGTCGGTGGGTGGAAATCGGCGGTTCGGCCGCCGATTTTAAG…
k141_19104252_1	0	0	0	0	0	0	0	0	0	0	0	0	0	0	0	0	0	0	0	0	0	0	pmoB	G1UBD1	43.979	382	209	3.31e-107	324	GCAAAGGCTTTAGAGCCGTTTATCAGGATGCGGACGATTCAATTCTATGACGTGCAATGGGACAAACAAAAATTCAATGTCAATGAAGATGTCAGCGTCAGCGGCAAGTTTCATGTCGCCGAGGATTGGCCGGTCAGCGTGCCCAAACCCGAGGCATCTTTTTTGAACATATCGACGCCTGGGCCGGTGCTAATCAGGACCGAGCGTTATTTGAACGGCAAACCCTTCATGAATTCCGTGGCCTTGCAGCCGGGCGGAGATTACACCTTCAAGATTGTGCTTAAAGGACGATTGCCGGGGCATTATCACATCCATCCCTTCTTTAACCTGAAAGACGCCGGGCAAGTGATGGGGCCTGGCGTATGGCTGGACATAGCCGGTCATGCTGATGACTTTACC…
k141_20527812_2	0	0	0	0	0	0	0	0	0	0	0	0	0	0	0	0	0	0	0	0	0	0	pmoA	Q607G3	40.088	227	131	1.34e-60	193	ATGGCGTCCCCTGCTGAACGTGGTGCCATTCGCGGTCAACTCGAACGCAACGTTGATTTGATACTACTCGCGGTTATCGTTTTCGCGGTGGCCGGTGCGACGATATTCGTCATGTCTGTCACGATCGGCGATTGGGAATTCTGGGCGGACTGGAAAGATCGGCGATTCTGGCCACTTTGGCCGGTCGCAGCCTTATTGGTTTTCCCCGCCGGGCTCGCCGCCGCGTTCTGGTCGCGTTTCCGCCTACCAGTGTCATGCACCGCGGTGGTACTGCTGTACAGCCTGATTCGATGGGTTAGCGTCTACTTGAATTTTCATTTGTTTGGCGGATATCCGCTGAGTTTCGTGTGGCCGTCGGTATTTATCCCGTTAGCGATAATTATCGATTGCACCTTGCTC…
k141_21775191_1	0	0	0	0	0	0	0	0	0	0	0	0	0	0	0	0	0	0	0	0	0	0	pmoA	Q607G3	50.877	171	84	2.72e-56	180	GTGCAAGCCGTGTTGTGGACCAATTTTCGCCTGCCATTGGGTGCAACCCTGTGTGTTGCGTGCTTATTAATAGGCACTTGGATTGCGCGTTTCTTCGCTTATCACTTATGGAATTATTTTCCCATCAACATGGTGATGCCATCGACACTGTTGCCCAGTGCGCTCGTTTTGGATGTTATTTTAATGTTGAGCAACAGCCTGACCATTACCGCGATTTTCGGCGGCGCTGCGTTCGCATTGCTATTTTACCCCAGTAACTGGCCTATCTTTGGCCTGTTCCATGTCCCTGTTGAAGCGGGTAATAGTCAGTTGACAGTGGCCGATATGTACGGCTTCCAGTACATTCGTGCCGGGATGCCGGAATATCTTCGCATCATTGAGCGCGGGACGTTACGGACT…
k141_25301340_23	0	0	0	0	0	0	0	0	0	0	0	0	0	0	0	0	0	0	0	0	0	0	pmoA	Q607G3	41.841	239	139	6.13e-67	210	GTGGATAAAGGGGCCGCTTTAAAGGATAAGCTTGAGCGAACGACAGACATTTTCGTTCTTACGGCGGTATTTTTCGCGATAGCGGGCGCGACCCCGTTCGTCATGGCTGTAACCATGGGGGATTGGGAATACTGGGTCGATTGGAAGGACCGGCGTTTCTGGCCGCTTGTGCCGATCGTTCTGCTCATGATCTTCCCGGCCGGTCTCTCTGCCGTCTTCTGGAGCCGCTTCCGGTTGCCCATCGCATGCACGACCGTCGTCGTATCCTACTCGCTGTTACGCTGGGCGAGTACCTACCTTAATTTTCATCTGTTCGCAGGCTATCCGCTCAGCTTTGTCTGGCCATCGGTGTTCGTACCACTCGCGATCATTCTCGACTGCAGTCTCTTGATTACGCGC…
k141_25301340_24	0	0	0	0	0	0	0	0	0	0	0	0	0	0	0	0	0	0	0	0	0	0	pmoB	G1UBD1	41.133	406	226	2.36e-102	314	GTGGGGGGTCGGCTCGATGTTGAATCGGCAGACGTGGGTCAAGAAGACCTGACGACGAAACTCGAGCGCGGCACCTGTGTTCGGAGCCTGCGTTGTAAAACGCGATTGCAGTTGATGGGCACTCCGATGTATCGAACGAGAACTCTAGCGGCATTCCTCATCCTCTTGACGTTTGGGCCAAATGTTCTTGCCCACGGCGAACGTGCTCAGCAGGCCAACCTGCGCATGCGCACGGTTAACTGGTACGACATCGACCTGTCGCAGATCAACGTTTCTGTCGGAGACGACGTAGTCATTTCGGGGCGCCTGCGGCCATCGAAATTCTGGCCGGAACACATCCCGTCGGTTGCAGGACGCGTCTTTCTTAACGTCGGCACGTCGGGGCCGAATTTTGTGCGG…
k141_25604533_1	0	0	0	0	0	0	0	0	0	0	0	0	0	0	0	0	0	0	0	0	0	0	pmoB	G1UBD1	33.607	366	235	1.55e-65	217	ATGGGCCGATTAGTACGAATCTTGACAGGAGCCTTCTTTGTCTTGTGCCTGCTCGGCAGCCATACAGCGCGGGTGTACGCCCATGGCGAACATAACCTGGAGCCTTTTATACGCATGCGTGGCCTGGCGTTTTTCAACGTCAGCTTCTCGCACGACAGGCTCAAGGTCAACGAAACCATGACCGTCACTGGCAAATTCCGGCTGATGGAGTCATGGCCACGGATGTTACCTGAGCCGGAATTAAGCGGGATTGGTATTTTGGTGCCCGGTCCCAAGCTGGCGATCAGGGAACGCTGGATCAACGGCCAGTTCATGCAGAATGCCTTCCACATCGAAATCGGCCGGCTGTACGATTTCAAGCTCGTCCTCCAGGCGCGCCAGCCGGGCCGTTACCATGTG…
k141_26391732_1	0	0	0	0	0	0	0	0	0	0	0	0	0	0	0	0	0	0	0	0	0	0	pmoB	G1UBD1	62.581	155	58	7.67e-51	171	CTATTCAGAAACAGAACCACTCGTTGGACCTTTATTTACCTGCTGTTTGCTTTTGCAGTGATAAGCTTCTACGCGCCAATTACATTGGCCCAAGATGATAAGTCCAAGGCGGAATTTAAGCGTATGCACAACATACAGTGGTACGACGTGCACTGGTCCAAGGAAAAAGTCAATGTCAACGAAGATGTTGAAGTAACGGGAAAATTCCATGTGTTTGCAGGTTGGCCTGAAACCGTGGCCAAACCCGATGTAGATTTCTTGAACATTGGTATCTCAGGTCCAGTATTTATACGTGCTGGATCATGGATTGGTGGTCAATTGGTTCCTCGTTCAGTGAGTCTTGAACTCGGTGAAACCTACGAATTCAAGGTTTTGTTGAAAGCCAAGCGACCCGGTACC…
k141_26632164_1	0	0	0	0	0	0	0	0	0	0	0	0	0	0	0	0	0	0	0	0	0	0	pmoB	G1UBD1	40.316	253	144	1.87e-55	186	CGTTTCCGACCGTCCAATCAATGGCCTGAGCAGATCCCGACGATCGAGGATCGCGTATTTCTAAACGTCGGTACCGCGGGACCTAATTTCGTGCGGCTGGCTTCGAATATCGATGGCGTGAGCGCAGTTCAGTCGACGTCGCTAGAGTTTGGTAAGGACTACAGTTTCGAGATCCAGATGAAGGCGCGCAAACCGGGACGCTTTCACGTGCATCCGATACTCAACGTCAAGGACGCCGGGAGTATGGTCGGGCCCGGGCGATGGGTCGAGGTGAGTGGCGCAGCGGCAGACTTCGACAACAAAGTCGAGACCATGTTTGGACGCGAGGTCGATTTGGAAACGTTCAATCTGGCTACGATCGGCAGCTGGCATATGATTTGGTTCGTGGTCGGCGGCGCC…
k141_27093863_2	0	0	0	0	0	0	0	0	0	0	0	0	0	0	0	0	0	0	0	0	0	0	pmoA	Q607G3	51.489	235	114	6.73e-87	261	ATGTCTGCAAATATTTCAAATCGGTCTTTTCGACCCTATACCGGAGAAAAAGCCCGCATTACCCGCGCTTATGATTATCTTATCCTGGTCTTGGCTCTTTTTCTGTTTATCGGTGCCTTTCATCTGCATTTTGCGCTGACCGTTGGCGACTGGGATTTCTGGGTGGACTGGAAGGACAGGCAATGGTGGCCGCTGGTTACGCCTCTTATGGGTATTACCTTTCCTGCCGCAGTACAAGCTGTCATGTGGGAAAAGTTTCGCCTTCCGATGGGCGCGACCTTGTGTGTTACGGCCTTATTGATTGGAACCTGGATAACCCGGGTATTCGCCTATCACTACTGGAATTATTTTCCCATTAATATGGTTTTGCCTGCCACCATGCTGCCGGGTGCTCTTGTC…
k141_31461389_1	0	0	0	0	0	0	0	0	0	0	0	0	0	0	0	0	0	0	0	0	0	0	pmoB	G1UBD1	44.92	187	99	1.05e-41	147	GGCATGGAAGATGAACTGGTTACGGCCAATGACCGCTCGCTTGCAATAGCCGTGTTGATCGGCGTGCCTTTGCTTGTGCTGGCCGCAAATGCAATGACGATCAGCCAATATCCGAAGGCGATTCCGTTGCAGGCCTCTTTGGACCAGATTCTGCCGCTGTCTGCCCAGGTCAATGCCGGCGTGGTCGATGTTGAAACATTAAAGGCCGAGTACCGCGTGCCGGAACGCGCGATGACGTTAACCGTAAAAATCAACAATGGCAGCGATAAGCCGATTCAAATAGGGGAGTTCGCTACCGCCAATGTACGTTTTCTCAACAACGATGTGCCGGCACCGGATCAAGGTGTTTCTGAAAATTCGGTAGCTCCGGTAGGATTAAGTCTGGCGAATGCCGAGCCT…
k141_31809448_2	0	0	0	0	0	0	0	0	0	0	0	0	0	0	0	0	0	0	0	0	0	0	pmoA	Q607G3	48.718	234	120	4.05e-79	241	ATGTCTGCAAATCTTACCAAACAAATTTTTCGACCCTATACCGGAGAAAAGGCACGAATCACCCGTGCCTATGATTATCTCATCCTGGTATTGGCGCTGTTTTTATTTATCGGTTCCTTTCATCTGAGTTTTGCCCTGACCGTCGGCGATTGGGATTTTTGGGTGGACTGGAAGGACAGGCAATGGTGGCCGTTGGTGACACCACTGATCGGCATAACTTTTCCGGCGGCAGTGCAAGCCGTGTTGTGGACTAATTTCCGATTGCCGTTAGGAGCCACTCTCTGTGTGGCTTGCCTATCCATAGGCACCTGGATTGCCCGCATCTTCGCTTACCACTTATGGAATTATTTCCCAATCAACATGGTGATGCCATCAACCATGCTGCCCAGTGCGCTGGTG…
k141_32844008_1	0	0	0	0	0	0	0	0	0	0	0	0	0	0	0	0	0	0	0	0	0	0	pmoA	Q607G3	43.415	205	116	1.72e-61	195	ACCCCGTTCGTCATGGCCGTAACCATGGGGGACTGGGAATACTGGGTCGACTGGAAGGATCGGCGATTCTGGCCACTCGTGCCGATCGTCCTGCTCATGATCTTTCCGGCCGGCCTGTCTGCCGTATTCTGGAGCCGCTTCCGGCTGCCGATCGCATGCACGACCGTCGTTGTATCCTACTCGTTGCTACGCTGGGCGAGTACCTACCTTAATTTCCATCTATTCGCCGGCTATCCGCTGAGCTTTGTCTGGCCATCGGTGTTCGTCCCACTCGCGATCATCCTCGACTGCAGTCTGTTGATTACGCGCAGCGTGTTCGTCACCGGATTCTGCGGTGCGTTCATGTGGGGCGTACTCGTGTATCCGCTCAACTGGCCGATGCTGGCAGGGTTCCATGAG…
k141_34350840_1	0	0	0	0	0	0	0	0	0	0	0	0	0	0	0	0	0	0	0	0	0	0	pmoA	Q607G3	51.471	204	99	1.13e-74	229	TCAGCAAATATTTCAAAGCGGTCTTTTCGACCCTATACCGGGGAGAAAGCCCGGATCACCAGAGCCTACGATTATCTCATTCTCGTACTGGCTCTTTTTCTGTTTATCGGCGCATTTCATCTACATTTTGCTCTGACCGTTGGCGACTGGGATTTCTGGATTGACTGGAAGGACAGGCAATGGTGGCCGCTGGTTACGCCGCTGATGGGCATTACCTTTCCGGCTGCGGTGCAGGCTGTCATGTGGGAAAAGTTTCGCCTGCCGATGGGCGCAACCTTGTGTGTCACGGCCTTATTGATAGGAACCTGGGTAGCCCGCATATTCGCCTATCACTACTGGAATTATTTTCCCATTAACATGGTGCTGCCCGCCACCATGCTTCCCGGTGCGCTGGTCCTG…
k141_6161381_2	0	0	0	0	0	0	0	0	0	0	0	0	0	0	0	0	0	0	0	0	0	0	pmoB	G1UBD1	44.186	172	91	3.2e-36	132	CTGGTGTTGGCTGCCAATGCCATGACGACCAGCCAGTATCCGAACACGATTCCGTTACAGGCCTCGCTGGATCAGATTCTGCCGCTCTCGGCTCAGGTGAACGCTGGCGTGGTTGATGTCGAAACCTTGAAAGCGGAATACCGGGTGCCGGACCGCGCGATGGCTTTCACCTTAAAAATCAACAATCGCAGCGACAAGCCGATTCGAATAGGCGAATTTGCTACCGCCAATGTGCGCTTCCTCAATAAGGAGCTACAGGCATCTTATCAAGGCGGGGGCTCGGAAAATATGACCGCTCCGGAAGGCTTGAGCCTGGATAATGCCGCGCCTATACAACCGGGCGAACAGCGCACGATGACGATGACCGCCAGAGATGCGTTATGGGAGTCGGAAAAGCTG…

## Sheet: Data S3
RNA 2018 Sample	Water depth (m)	16S rRNA gene Ct values	Degenerate: pmoA_13144881_3-1700181_5 Ct values	pmoA_13667928_2 Ct values	pmoA_1700181_5 Ct values	Degenerate: pmoA_13144881_3-1700181_5 NRQ values	pmoA_13667928_2 NRQ values	pmoA_1700181_5 NRQ values
12 A	12	12.1621	27.5663	32.2601	35.4857	2.30605e-05	8.91058e-07	9.52612e-08
12 B	12	12.6917	28.5143	31.8463	37.844	1.72548e-05	1.71357e-06	2.68163e-08
12 C	12	12.3217	27.8122	31.8123	33.2271	2.17219e-05	1.3575e-06	5.09161e-07
16 A	12	12.3575	29.3897	31.7837	35.0255	7.46101e-06	1.41949e-06	1.50057e-07
16 B	12	12.8149	29.9466	34.064	45	6.96352e-06	4.01221e-07	2.04794e-10
16 C	12	12.5553	30.5361	32.873	45	3.86572e-06	7.65164e-07	1.71065e-10
11 A	18	14.5369	29.4715	32.9448	33.2912	3.19337e-05	2.87531e-06	2.26146e-06
11 B	18	12.4502	27.3319	31.0071	33.4388	3.3125e-05	2.59315e-06	4.80613e-07
11 C	18	12.4965	27.0416	30.535	31.3514	4.18311e-05	3.71436e-06	2.10928e-06
15 A	28	13.0135	25.7916	29.1976	29.7669	0.000142369	1.34312e-05	9.05186e-06
15 B	28	13.1411	24.7271	28.2066	27.7976	0.000325289	2.91631e-05	3.87209e-05
15 C	28	13.0252	25.8726	28.9474	29.663	0.000135691	1.61046e-05	9.80672e-06
10 A	36	12.2314	20.3245	23.1216	22.8682	0.00366214	0.000526924	0.000628074
10 B	36	12.2481	20.4889	23.5288	22.9159	0.00330588	0.00040196	0.000614703
10 C	36	13.0017	21.474	25.1458	23.612	0.00281561	0.000220932	0.000639664
7 A	37	12.6943	21.6954	24.7544	24.8356	0.00195161	0.000234174	0.00022137
7 B	37	12.2561	21.2344	23.8784	24.4218	0.0019827	0.000317201	0.000217645
7 C	37	12.02	20.7576	23.4608	23.8599	0.00234271	0.00035974	0.000272796
13 A	40	12.4963	20.2076	23.002	22.6648	0.00477152	0.000687793	0.0008689
13 B	40	12.3462	20.0905	22.6001	22.4705	0.00466376	0.000819019	0.000895969
13 C	40	12.9263	20.9586	23.5552	23.2744	0.0038199	0.000631547	0.000767206
	RT-qPCR primers:	515F	Degenerate: pmoA_13144881_3-1700181_5_Fw	pmoA_13667928_2_Fw	pmoA_1700181_5_Fw
		GTGYCAGCMGCCGCGGTAA	GAGYGCATCTCAATCAGCTGTACG	TGCTTGTGGTGGAGATACCG	TATGGGTAACCGTAGCACCG
		Parada et al. 2016	This study	This study	This study
		805R	Degenerate: pmoA_13144881_3-1700181_5_Rv	pmoA_13667928_2_Rv	pmoA_1700181_5_Rv
		GACTACHVGGGTATCTAATCC	GTCCAGAAATCCCAGTCACCRC	TCCAACCCCAGAAGTTCATGT	ACTGCTACTACCGCACCAAA
		Herlemann et al. 2011	This study	This study	This study
References
Parada, A. E., Needham, D. M., & Fuhrman, J. A. (2016). Every base matters: assessing small subunit rRNA primers for marine microbiomes with mock communities, time series and global field samples. Environmental microbiology, 18(5), 1403-1414.
Herlemann, D. P., Labrenz, M., Jürgens, K., Bertilsson, S., Waniek, J. J., & Andersson, A. F. (2011). Transitions in bacterial communities along the 2000 km salinity gradient of the Baltic Sea. The ISME journal, 5(10), 1571-1579.

## Sheet: Data S4
Prokarotic taxonomy, 16S rRNA gene classifications [SILVA database]. Values show raw sequence counts	2018 DNA 007 A	2018 DNA 007 B	2018 DNA 007 C	2018 DNA 010 A	2018 DNA 010 B	2018 DNA 010 C	2018 DNA 011 A	2018 DNA 011 B	2018 DNA 011 C	2018 DNA 012 A	2018 DNA 012 B	2018 DNA 012 C	2018 DNA 013 A	2018 DNA 013 B	2018 DNA 013 C	2018 DNA 015 A	2018 DNA 015 B	2018 DNA 015 C	2018 DNA 016 A	2018 DNA 016 B	2018 DNA 016 C	2017 DNA 005 A	2017 DNA 005 B	2017 DNA 005 C	2017 DNA 007 A	2017 DNA 007 B	2017 DNA 007 C	2017 DNA 010 A	2017 DNA 010 B	2017 DNA 010 C	2017 DNA 011 A	2017 DNA 011 B	2017 DNA 011 C	2017 DNA 012 A	2017 DNA 012 B	2017 DNA 012 C	2017 DNA 013 A	2017 DNA 013 B	2017 DNA 013 C	2017 DNA 015 A	2017 DNA 015 B	2017 DNA 015 C	2017 DNA 016 A	2017 DNA 016 B	2017 DNA 016 C
Archaea/Crenarchaeota/Thermoprotei/Sulfolobales/Sulfolobaceae/Acidianus	0	0	0	0	0	0	0	0	0	0	0	0	0	0	0	0	0	0	0	0	0	0	0	0	0	0	0	0	0	0	0	0	0	0	0	0	0	0	0	0	0	0	0	0	0
Archaea/Crenarchaeota/Thermoprotei/Sulfolobales/Sulfolobaceae/Sulfolobus	0	0	0	0	0	0	0	0	0	0	0	0	0	0	0	0	0	0	0	0	0	0	0	0	0	0	0	0	0	0	0	0	0	0	0	0	0	0	0	0	0	0	0	0	0
Archaea/Crenarchaeota/Verstraetearchaeia/Methanomethyliales/Methanomethyliaceae/Candidatus Methanomethylicus	0	0	0	0	0	0	0	0	0	0	0	0	0	0	0	0	0	0	0	0	0	0	0	0	0	0	0	0	0	0	0	0	0	0	0	0	0	0	0	0	0	0	0	0	0
Archaea/Diapherotrites/Iainarchaeia/Iainarchaeales/Iainarchaeaceae/Candidatus Iainarchaeum	0	0	0	0	0	0	0	0	0	0	0	0	0	0	0	0	0	0	0	0	0	0	0	0	0	0	0	0	0	0	0	0	0	0	0	0	0	0	0	0	0	0	0	0	0
Archaea/Euryarchaeota/Archaeoglobi/Archaeoglobales/Archaeoglobaceae/uncultured	0	0	0	0	0	0	0	0	0	0	0	0	0	0	0	0	0	0	0	0	0	0	0	0	0	0	0	0	0	0	0	0	0	0	0	0	0	0	0	0	0	0	0	0	0
Archaea/Euryarchaeota/Halobacteria/Halobacteriales/Halococcaceae/Halococcus	0	0	0	0	0	0	0	0	0	0	0	0	0	0	0	0	0	0	0	0	0	0	0	0	0	0	0	0	0	0	0	0	0	0	0	0	0	0	0	0	0	0	0	0	0
Archaea/Euryarchaeota/Halobacteria/Halobacteriales/Halococcaceae/Halostella	0	0	0	0	0	0	0	0	0	0	0	0	0	0	0	0	0	0	0	0	0	0	0	0	0	0	0	0	0	0	0	0	0	0	0	0	0	0	0	0	0	0	0	0	0
Archaea/Euryarchaeota/Halobacteria/Halobacteriales/Haloferacaceae/Halohasta	0	0	0	0	0	0	0	0	0	0	0	0	0	0	0	0	0	0	0	0	0	0	0	0	0	0	0	0	0	0	0	0	0	0	0	0	0	0	0	0	0	0	0	0	0
Archaea/Euryarchaeota/Halobacteria/Halobacteriales/Haloferacaceae/Halolamina	0	0	0	0	0	0	0	0	0	0	0	0	0	0	0	0	0	0	0	0	0	0	0	0	0	0	0	0	0	0	0	0	0	0	0	0	0	0	0	0	0	0	0	0	0
Archaea/Euryarchaeota/Halobacteria/Halobacteriales/Haloferacaceae/Halonotius	0	0	0	0	0	0	0	0	0	0	0	0	0	0	0	0	0	0	0	0	0	0	0	0	0	0	0	0	0	0	0	0	0	0	0	0	0	0	0	0	0	0	0	0	0
Archaea/Euryarchaeota/Halobacteria/Halobacteriales/Haloferacaceae/Halorubrum	0	0	0	0	0	0	0	0	0	0	0	0	0	0	0	0	0	0	0	0	0	0	0	0	0	0	0	0	0	0	0	0	0	0	0	0	0	0	0	0	0	0	0	0	0
Archaea/Euryarchaeota/Halobacteria/Halobacteriales/Haloferacaceae/Natronoarchaeum	0	0	0	0	0	0	0	0	0	0	0	0	0	0	0	0	0	0	0	0	0	0	0	0	0	0	0	0	0	0	0	0	0	0	0	0	0	0	0	0	0	0	0	0	0
Archaea/Euryarchaeota/Methanobacteria/Methanobacteriales/Methanobacteriaceae/Methanobacterium	0	0	0	0	0	0	0	0	0	0	0	0	0	0	0	0	0	0	0	0	0	0	0	0	0	0	0	0	0	0	0	0	0	0	0	0	0	0	0	0	0	0	0	0	0
Archaea/Euryarchaeota/Methanobacteria/Methanobacteriales/Methanobacteriaceae/Methanobrevibacter	0	0	0	0	0	0	0	0	0	0	0	0	0	0	0	0	0	0	0	0	0	0	0	0	0	0	0	0	0	0	0	0	0	0	0	0	0	0	0	0	0	0	0	0	0
Archaea/Euryarchaeota/Methanobacteria/Methanobacteriales/Methanobacteriaceae/Methanosphaera	0	0	0	0	0	0	0	0	0	0	0	0	0	0	0	0	0	0	0	0	0	0	0	0	0	0	0	0	0	0	0	0	0	0	0	0	0	0	0	0	0	0	0	0	0
Archaea/Euryarchaeota/Methanobacteria/Methanobacteriales/Methanothermaceae/Methanothermus	0	0	0	0	0	0	0	0	0	0	0	0	0	0	0	0	0	0	0	0	0	0	0	0	0	0	0	0	0	0	0	0	0	0	0	0	0	0	0	0	0	0	0	0	0
Archaea/Euryarchaeota/Methanococci/Methanococcales/Methanococcaceae/Methanococcus	0	0	0	0	0	0	0	0	0	0	0	0	0	0	0	0	0	0	0	0	0	0	0	0	0	0	0	0	0	0	0	0	0	0	0	0	0	0	0	0	0	0	0	0	0
Archaea/Euryarchaeota/Methanomicrobia/Methanocellales/Methanocellaceae/Methanocella	0	0	0	0	0	0	0	0	0	0	0	0	0	0	0	0	0	0	0	0	0	0	0	0	0	0	0	0	0	0	0	0	0	0	0	0	0	0	0	0	0	0	0	0	0
Archaea/Euryarchaeota/Methanomicrobia/Methanomicrobiales/Methanocorpusculaceae/Methanocalculus	0	0	0	0	0	0	0	0	0	0	0	0	0	0	0	0	0	0	0	0	0	0	0	0	0	0	0	0	0	0	0	0	0	0	0	0	0	0	0	0	0	0	0	0	0
Archaea/Euryarchaeota/Methanomicrobia/Methanomicrobiales/Methanocorpusculaceae/Methanocorpusculum	0	0	0	0	0	0	0	0	0	0	0	0	0	0	0	0	0	0	0	0	0	0	0	0	0	0	0	0	0	0	0	0	0	0	0	0	0	0	0	0	0	0	0	0	0
Archaea/Euryarchaeota/Methanomicrobia/Methanomicrobiales/Methanomicrobiaceae/Methanoculleus	0	0	0	0	0	0	0	0	0	0	0	0	0	0	0	0	0	0	0	0	0	0	0	0	0	0	0	0	0	0	0	0	0	0	0	0	0	0	0	0	0	0	0	0	0
Archaea/Euryarchaeota/Methanomicrobia/Methanomicrobiales/Methanomicrobiaceae/Methanogenium	0	0	0	0	0	0	0	0	0	0	0	0	0	0	0	0	0	0	0	0	0	0	0	0	0	0	0	0	0	0	0	0	0	0	0	0	0	0	0	0	0	0	0	0	0
Archaea/Euryarchaeota/Methanomicrobia/Methanomicrobiales/Methanomicrobiaceae/Methanomicrobium	0	0	0	0	0	0	0	0	0	0	0	0	0	0	0	0	0	0	0	0	0	0	0	0	0	0	0	0	0	0	0	0	0	0	0	0	0	0	0	0	0	0	0	0	0
Archaea/Euryarchaeota/Methanomicrobia/Methanomicrobiales/Methanomicrobiaceae/SDB	0	0	0	0	0	0	0	0	0	0	0	0	0	0	0	0	0	0	0	0	0	0	0	0	0	0	0	0	0	0	0	0	0	0	0	0	0	0	0	0	0	0	0	0	0
Archaea/Euryarchaeota/Methanomicrobia/Methanomicrobiales/Methanomicrobiaceae/uncultured	0	0	0	0	0	0	0	0	0	0	0	0	0	0	0	0	0	0	0	0	0	0	0	0	0	0	0	0	0	0	0	0	0	0	0	0	0	0	0	0	0	0	0	0	0
Archaea/Euryarchaeota/Methanomicrobia/Methanomicrobiales/Methanoregulaceae/Methanolinea	0	0	0	0	0	0	0	0	0	0	0	0	0	0	0	0	0	0	0	0	0	0	0	0	0	0	0	0	0	0	0	0	0	0	0	0	0	0	0	0	0	0	0	0	0
Archaea/Euryarchaeota/Methanomicrobia/Methanomicrobiales/Methanoregulaceae/Methanoregula	0	0	0	0	0	0	0	0	0	0	0	0	0	0	0	0	0	0	0	0	0	0	0	0	0	0	0	0	0	0	0	0	0	0	0	0	0	0	0	0	0	0	0	0	0
Archaea/Euryarchaeota/Methanomicrobia/Methanomicrobiales/Methanospirillaceae/Methanospirillum	0	0	0	0	0	0	0	0	0	0	0	0	0	0	0	0	0	0	0	0	0	0	0	0	0	0	0	0	0	0	0	0	0	0	0	0	0	0	0	0	0	0	0	0	0
Archaea/Euryarchaeota/Methanomicrobia/Methanosarcinales/ANME-2a-2b/ANME-2b	0	0	0	0	0	0	0	0	0	0	0	0	0	0	0	0	0	0	0	0	0	0	0	0	0	0	0	0	0	0	0	0	0	0	0	0	0	0	0	0	0	0	0	0	0
Archaea/Euryarchaeota/Methanomicrobia/Methanosarcinales/Methanoperedenaceae/Candidatus Methanoperedens	0	0	0	0	0	0	0	0	0	0	0	0	0	0	0	0	0	0	0	0	0	0	0	0	0	0	0	0	0	0	0	0	0	0	0	0	0	0	0	0	0	0	0	0	0
Archaea/Euryarchaeota/Methanomicrobia/Methanosarcinales/Methanosaetaceae/Methanosaeta	0	0	0	0	0	0	0	0	0	0	0	0	0	0	0	0	0	0	0	0	0	0	0	0	0	0	0	0	0	0	0	0	0	0	0	0	0	0	0	0	0	0	0	0	0
Archaea/Euryarchaeota/Methanomicrobia/Methanosarcinales/Methanosarcinaceae/ANME-3	0	0	0	0	0	0	0	0	0	0	0	0	0	0	0	0	0	0	0	0	0	0	0	0	0	0	0	0	0	0	0	0	0	0	0	0	0	0	0	0	0	0	0	0	0
Archaea/Euryarchaeota/Methanomicrobia/Methanosarcinales/Methanosarcinaceae/Methanimicrococcus	0	0	0	0	0	0	0	0	0	0	0	0	0	0	0	0	0	0	0	0	0	0	0	0	0	0	0	0	0	0	0	0	0	0	0	0	0	0	0	0	0	0	0	0	0
Archaea/Euryarchaeota/Methanomicrobia/Methanosarcinales/Methanosarcinaceae/Methanococcoides	0	0	0	0	0	0	0	0	0	0	0	0	0	0	0	0	0	0	0	0	0	0	0	0	0	0	0	0	0	0	0	0	0	0	0	0	0	0	0	0	0	0	0	0	0
Archaea/Euryarchaeota/Methanomicrobia/Methanosarcinales/Methanosarcinaceae/Methanohalophilus	0	0	0	0	0	0	0	0	0	0	0	0	0	0	0	0	0	0	0	0	0	0	0	0	0	0	0	0	0	0	0	0	0	0	0	0	0	0	0	0	0	0	0	0	0
Archaea/Euryarchaeota/Methanomicrobia/Methanosarcinales/Methanosarcinaceae/Methanolobus	0	0	0	0	0	0	0	0	0	0	0	0	0	0	0	0	0	0	0	0	0	0	0	0	0	0	0	0	0	0	0	0	0	0	0	0	0	0	0	0	0	0	0	0	0
Archaea/Euryarchaeota/Methanomicrobia/Methanosarcinales/Methanosarcinaceae/Methanosarcina	0	0	0	0	0	0	0	0	0	0	0	0	0	0	0	0	0	0	0	0	0	0	0	0	0	0	0	0	0	0	0	0	0	0	0	0	0	0	0	0	0	0	0	0	0
Archaea/Euryarchaeota/Methanomicrobia/Methanosarcinales/Methanosarcinaceae/uncultured	0	0	0	0	0	0	0	0	0	0	0	0	0	0	0	0	0	0	0	0	0	0	0	0	0	0	0	0	0	0	0	0	0	0	0	0	0	0	0	0	0	0	0	0	0
Archaea/Euryarchaeota/Methanomicrobia/Methanosarcinales/Methermicoccaceae/Candidatus Syntrophoarchaeum	0	0	0	0	0	0	0	0	0	0	0	0	0	0	0	0	0	0	0	0	0	0	0	0	0	0	0	0	0	0	0	0	0	0	0	0	0	0	0	0	0	0	0	0	0
Archaea/Euryarchaeota/Thermococci/Methanofastidiosales/Methanofastidiosaceae/Candidatus Methanofastidiosum	0	0	0	0	0	0	0	0	0	0	0	0	0	0	0	0	0	0	0	0	0	0	0	0	0	0	0	0	0	0	0	0	0	0	0	0	0	0	0	0	0	0	0	0	0
Archaea/Euryarchaeota/Thermococci/Thermococcales/Thermococcaceae/Thermococcus	0	0	0	0	0	0	0	0	0	0	0	0	0	0	0	0	0	0	0	0	0	0	0	0	0	0	0	0	0	0	0	0	0	0	0	0	0	0	0	0	0	0	0	0	0
Archaea/Euryarchaeota/Thermoplasmata/Methanomassiliicoccales/Methanomassiliicoccaceae/Methanomassiliicoccus	0	0	0	0	0	0	0	0	0	0	0	0	0	0	0	0	0	0	0	0	0	0	0	0	0	0	0	0	0	0	0	0	0	0	0	0	0	0	0	0	0	0	0	0	0
Archaea/Euryarchaeota/Thermoplasmata/Methanomassiliicoccales/Methanomassiliicoccaceae/uncultured	0	0	0	0	0	0	0	0	0	0	0	0	0	0	0	0	0	0	0	0	0	0	0	0	0	0	0	0	0	0	0	0	0	0	0	0	0	0	0	0	0	0	0	0	0
Archaea/Euryarchaeota/Thermoplasmata/Methanomassiliicoccales/Methanomethylophilaceae/Candidatus Methanomethylophilus	0	0	0	0	0	0	0	0	0	0	0	0	0	0	0	0	0	0	0	0	0	0	0	0	0	0	0	0	0	0	0	0	0	0	0	0	0	0	0	0	0	0	0	0	0
Archaea/Euryarchaeota/Thermoplasmata/Methanomassiliicoccales/Methanomethylophilaceae/Candidatus Methanoplasma	0	0	0	0	0	0	0	0	0	0	0	0	0	0	0	0	0	0	0	0	0	0	0	0	0	0	0	0	0	0	0	0	0	0	0	0	0	0	0	0	0	0	0	0	0
Archaea/Euryarchaeota/Thermoplasmata/Methanomassiliicoccales/Methanomethylophilaceae/uncultured	0	0	0	0	0	0	0	0	0	0	0	0	0	0	0	0	0	0	0	0	0	0	0	0	0	0	0	0	0	0	0	0	0	0	0	0	0	0	0	0	0	0	0	0	0
Archaea/Euryarchaeota/Thermoplasmata/Thermoplasmatales/Aciduliprofundaceae/Aciduliprofundum	0	0	0	0	0	0	0	0	0	0	0	0	0	0	0	0	0	0	0	0	0	0	0	0	0	0	0	0	0	0	0	0	0	0	0	0	0	0	0	0	0	0	0	0	0
Archaea/Euryarchaeota/Thermoplasmata/Thermoplasmatales/Thermoplasmataceae/uncultured	0	0	0	0	0	0	0	0	0	0	0	0	0	0	0	0	0	0	0	0	0	0	0	0	0	0	0	0	0	0	0	0	0	0	0	0	0	0	0	0	0	0	0	0	0
Archaea/Korarchaeota/Korarchaeia/Korarchaeales/Korarchaeaceae/Candidatus Korarchaeum	0	0	0	0	0	0	0	0	0	0	0	0	0	0	0	0	0	0	0	0	0	0	0	0	0	0	0	0	0	0	0	0	0	0	0	0	0	0	0	0	0	0	0	0	0
Archaea/Nanoarchaeaeota/Nanohaloarchaeia/Nanohaloarchaeales/Nanohaloarchaeaceae/Candidatus Nanosalinarum	0	0	0	0	0	0	0	0	0	0	0	0	0	0	0	0	0	0	0	0	0	0	0	0	0	0	0	0	0	0	0	0	0	0	0	0	0	0	0	0	0	0	0	0	0
Archaea/Thaumarchaeota/Nitrososphaeria/Nitrosocaldales/Nitrosocaldaceae/Candidatus Nitrosocaldus	0	0	0	0	0	0	0	0	0	0	0	0	0	0	0	0	0	0	0	0	0	0	0	0	0	0	0	0	0	0	0	0	0	0	0	0	0	0	0	0	0	0	0	0	0
Archaea/Thaumarchaeota/Nitrososphaeria/Nitrosopumilales/Nitrosopumilaceae/Candidatus Nitrosoarchaeum	0	0	0	0	0	0	0	0	0	0	0	0	0	0	0	0	0	0	0	0	0	0	0	0	0	0	0	0	0	0	0	0	0	0	0	0	0	0	0	0	0	0	0	0	0
Archaea/Thaumarchaeota/Nitrososphaeria/Nitrosopumilales/Nitrosopumilaceae/Candidatus Nitrosopelagicus	0	0	0	0	0	0	0	0	0	0	0	0	0	0	0	0	0	0	0	0	0	0	0	0	0	0	0	0	0	0	0	0	0	0	0	0	0	0	0	0	0	0	0	0	0
Archaea/Thaumarchaeota/Nitrososphaeria/Nitrosopumilales/Nitrosopumilaceae/Candidatus Nitrosopumilus	194	78	0	91	123	137	204	144	155	68	0	74	209	194	228	141	124	58	107	93	107	99	123	109	106	138	102	219	165	196	159	166	132	207	189	119	174	170	145	207	156	164	196	214	204
Archaea/Thaumarchaeota/Nitrososphaeria/Nitrosopumilales/Nitrosopumilaceae/Candidatus Nitrosotenuis	0	0	0	0	0	0	0	0	0	0	0	0	0	0	0	0	0	0	0	0	0	0	0	0	0	0	0	0	0	0	0	0	0	0	0	0	0	0	0	0	0	0	0	0	0
Archaea/Thaumarchaeota/Nitrososphaeria/Nitrosopumilales/Nitrosopumilaceae/Cenarchaeum	0	0	0	0	0	0	0	0	0	0	0	0	0	0	0	0	0	0	0	0	0	0	0	0	0	0	0	0	0	0	0	0	0	0	0	0	0	0	0	0	0	0	0	0	0
Archaea/Thaumarchaeota/Nitrososphaeria/Nitrososphaerales/Nitrososphaeraceae/Candidatus Nitrocosmicus	37	16	40	15	0	0	17	0	0	0	0	0	15	19	24	27	18	14	0	12	0	0	13	12	0	0	0	0	0	0	0	0	0	0	0	19	12	12	0	0	0	0	0	0	0
Archaea/Thaumarchaeota/Nitrososphaeria/Nitrososphaerales/Nitrososphaeraceae/Candidatus Nitrososphaera	0	0	0	0	0	0	0	0	0	0	0	0	0	0	0	0	0	0	0	0	0	0	0	0	0	0	0	0	0	0	0	0	0	0	0	0	0	0	0	0	0	0	0	0	0
Bacteria/Acidobacteria/Acidobacteriia/Acidobacteriales/Acidobacteriaceae (Subgroup 1)/Acidicapsa	0	0	0	0	0	0	0	0	0	0	0	0	0	0	0	0	0	0	0	0	0	0	0	0	0	0	0	0	0	0	0	0	0	0	0	0	0	0	0	0	0	0	0	0	0
Bacteria/Acidobacteria/Acidobacteriia/Acidobacteriales/Acidobacteriaceae (Subgroup 1)/Acidipila	0	0	0	0	0	0	0	0	0	0	0	0	0	0	0	0	0	0	0	0	0	0	0	0	0	0	0	0	0	0	0	0	0	0	0	0	0	0	0	0	0	0	0	0	0
Bacteria/Acidobacteria/Acidobacteriia/Acidobacteriales/Acidobacteriaceae (Subgroup 1)/Acidobacterium	0	0	0	0	0	0	0	0	0	0	0	0	0	0	0	0	0	0	0	0	0	0	0	0	0	0	0	0	0	0	0	0	0	0	0	0	0	0	0	0	0	0	0	0	0
Bacteria/Acidobacteria/Acidobacteriia/Acidobacteriales/Acidobacteriaceae (Subgroup 1)/Bryocella	0	0	0	0	0	0	0	0	0	0	0	0	0	0	0	0	0	0	0	0	0	0	0	0	0	0	0	0	0	0	0	0	0	0	0	0	0	0	0	0	0	0	0	0	0
Bacteria/Acidobacteria/Acidobacteriia/Acidobacteriales/Acidobacteriaceae (Subgroup 1)/Edaphobacter	0	0	0	0	0	0	0	0	0	0	0	0	0	0	0	0	0	0	0	0	0	0	0	0	0	0	0	0	0	0	0	0	0	0	0	0	0	0	0	0	0	0	0	0	0
Bacteria/Acidobacteria/Acidobacteriia/Acidobacteriales/Acidobacteriaceae (Subgroup 1)/Granulicella	0	0	0	0	0	0	0	0	0	0	0	0	0	0	0	0	0	0	0	0	0	0	0	0	0	0	0	0	0	0	0	0	0	0	0	0	0	0	0	0	0	0	0	0	0
Bacteria/Acidobacteria/Acidobacteriia/Acidobacteriales/Acidobacteriaceae (Subgroup 1)/Occallatibacter	0	0	0	0	0	0	0	0	0	0	0	0	0	0	0	0	0	0	0	0	0	0	0	0	0	0	0	0	0	0	0	0	0	0	0	0	0	0	0	0	0	0	0	0	0
Bacteria/Acidobacteria/Acidobacteriia/Acidobacteriales/Acidobacteriaceae (Subgroup 1)/Telmatobacter	0	0	0	0	0	0	0	0	0	0	0	0	0	0	0	0	0	0	0	0	0	0	0	0	0	0	0	0	0	0	0	0	0	0	0	0	0	0	0	0	0	0	0	0	0
Bacteria/Acidobacteria/Acidobacteriia/Acidobacteriales/Acidobacteriaceae (Subgroup 1)/Terracidiphilus	0	0	0	0	0	0	0	0	0	0	0	0	0	0	0	0	0	0	0	0	0	0	0	0	0	0	0	0	0	0	0	0	0	0	0	0	0	0	0	0	0	0	0	0	0
Bacteria/Acidobacteria/Acidobacteriia/Acidobacteriales/Acidobacteriaceae (Subgroup 1)/Terriglobus	0	0	0	0	0	0	0	0	0	0	0	0	0	0	0	0	0	0	0	0	0	0	0	0	0	0	0	0	0	0	0	0	0	0	0	0	0	0	0	0	0	0	0	0	0
Bacteria/Acidobacteria/Acidobacteriia/Acidobacteriales/Acidobacteriaceae (Subgroup 1)/uncultured	0	0	0	0	0	0	0	0	0	0	0	0	0	0	0	0	0	0	0	0	0	0	0	0	0	0	0	0	0	0	0	0	0	0	0	0	0	0	0	0	0	0	0	0	0
Bacteria/Acidobacteria/Acidobacteriia/Acidobacteriales/Koribacteraceae/Candidatus Koribacter	0	0	0	0	0	0	0	0	0	0	0	0	0	0	0	0	0	0	0	0	0	0	0	0	0	0	0	0	0	0	0	0	0	0	0	0	0	0	0	0	0	0	0	0	0
Bacteria/Acidobacteria/Acidobacteriia/Solibacterales/Solibacteraceae (Subgroup 3)/AKIW659	0	0	0	0	0	0	0	0	0	0	0	0	0	0	0	0	0	0	0	0	0	0	0	0	0	0	0	0	0	0	0	0	0	0	0	0	0	0	0	0	0	0	0	0	0
Bacteria/Acidobacteria/Acidobacteriia/Solibacterales/Solibacteraceae (Subgroup 3)/AMGG11	0	0	0	0	0	0	0	0	0	0	0	0	0	0	0	0	0	0	0	0	0	0	0	0	0	0	0	0	0	0	0	0	0	0	0	0	0	0	0	0	0	0	0	0	0
Bacteria/Acidobacteria/Acidobacteriia/Solibacterales/Solibacteraceae (Subgroup 3)/Bryobacter	0	0	0	0	0	0	0	0	0	0	0	0	0	0	0	0	0	0	0	0	0	0	0	0	0	0	0	0	0	0	0	0	0	0	0	0	0	0	0	0	0	0	0	0	0
Bacteria/Acidobacteria/Acidobacteriia/Solibacterales/Solibacteraceae (Subgroup 3)/Candidatus Solibacter	0	0	0	0	0	0	0	0	0	0	0	0	0	0	0	0	0	0	0	0	0	0	0	0	0	0	0	0	0	0	0	0	0	0	0	0	0	0	0	0	0	0	0	0	0
Bacteria/Acidobacteria/Acidobacteriia/Solibacterales/Solibacteraceae (Subgroup 3)/Elev-16S-1166	0	0	0	0	0	0	0	0	0	0	0	0	0	0	0	0	0	0	0	0	0	0	0	0	0	0	0	0	0	0	0	0	0	0	0	0	0	0	0	0	0	0	0	0	0
Bacteria/Acidobacteria/Acidobacteriia/Solibacterales/Solibacteraceae (Subgroup 3)/GOUTB8	0	0	0	0	0	0	0	0	0	0	0	0	0	0	0	0	0	0	0	0	0	0	0	0	0	0	0	0	0	0	0	0	0	0	0	0	0	0	0	0	0	0	0	0	0
Bacteria/Acidobacteria/Acidobacteriia/Solibacterales/Solibacteraceae (Subgroup 3)/Paludibaculum	0	0	0	0	0	0	0	0	0	0	0	0	0	0	0	0	0	0	0	0	0	0	0	0	0	0	0	0	0	0	0	0	0	0	0	0	0	0	0	0	0	0	0	0	0
Bacteria/Acidobacteria/Acidobacteriia/Solibacterales/Solibacteraceae (Subgroup 3)/PAUC26f	18	0	12	0	0	14	38	0	19	0	0	0	15	0	18	0	0	0	0	0	0	16	22	20	0	34	23	43	18	20	0	22	23	40	16	21	18	13	24	20	34	18	24	33	37
Bacteria/Acidobacteria/Acidobacteriia/Solibacterales/Solibacteraceae (Subgroup 3)/TSBb06	0	0	0	0	0	0	0	0	0	0	0	0	0	0	0	0	0	0	0	0	0	0	0	0	0	0	0	0	0	0	0	0	0	0	0	0	0	0	0	0	0	0	0	0	0
Bacteria/Acidobacteria/Blastocatellia (Subgroup 4)/Blastocatellales/Blastocatellaceae/Blastocatella	0	0	0	0	0	0	0	0	0	0	0	0	0	0	0	0	0	0	0	0	0	0	0	0	0	0	0	0	0	0	0	0	0	0	0	0	0	0	0	0	0	0	0	0	0
Bacteria/Acidobacteria/Blastocatellia (Subgroup 4)/Blastocatellales/Blastocatellaceae/JGI 0001001-H03	0	0	0	0	0	0	0	0	0	0	0	0	0	0	0	0	0	0	0	0	0	0	0	0	0	0	0	0	0	0	0	0	0	0	0	0	0	0	0	0	0	0	0	0	0
Bacteria/Acidobacteria/Blastocatellia (Subgroup 4)/Blastocatellales/Blastocatellaceae/OLB17	0	0	0	0	0	0	0	0	0	0	0	0	0	0	0	0	0	0	0	0	0	0	0	0	0	0	0	0	0	0	0	0	0	0	0	0	0	0	0	0	0	0	0	0	0
Bacteria/Acidobacteria/Blastocatellia (Subgroup 4)/Blastocatellales/Blastocatellaceae/Stenotrophobacter	0	0	0	0	0	0	0	0	0	0	0	0	0	0	0	0	0	0	0	0	0	0	0	0	0	0	0	0	0	0	0	0	0	0	0	0	0	0	0	0	0	0	0	0	0
Bacteria/Acidobacteria/Blastocatellia (Subgroup 4)/Blastocatellales/Blastocatellaceae/uncultured	0	0	0	0	0	0	0	0	0	0	0	0	0	0	0	0	0	0	0	0	0	0	0	0	0	0	0	0	0	0	0	0	0	0	0	0	0	0	0	0	0	0	0	0	0
Bacteria/Acidobacteria/Blastocatellia (Subgroup 4)/Chloracidobacteriales/Chloracidobacteriaceae/Chloracidobacterium	0	0	0	0	0	0	0	0	0	0	0	0	0	0	0	0	0	0	0	0	0	0	0	0	0	0	0	0	0	0	0	0	0	0	0	0	0	0	0	0	0	0	0	0	0
Bacteria/Acidobacteria/Blastocatellia (Subgroup 4)/Pyrinomonadales/Pyrinomonadaceae/RB41	0	0	0	0	0	0	0	0	0	0	0	0	0	0	0	0	0	0	0	0	0	0	0	0	0	0	0	0	0	0	0	0	0	0	0	0	0	0	0	0	0	0	0	0	0
Bacteria/Acidobacteria/Holophagae/Acanthopleuribacterales/Acanthopleuribacteraceae/Acanthopleuribacter	0	0	0	0	0	0	0	0	0	0	0	0	0	0	0	0	0	0	0	0	0	0	0	0	0	0	0	0	0	0	0	0	0	0	0	0	0	0	0	0	0	0	0	0	14
Bacteria/Acidobacteria/Holophagae/Acanthopleuribacterales/Acanthopleuribacteraceae/Thermotomaculum	0	0	0	0	0	0	0	0	0	0	0	0	0	0	0	0	0	0	0	0	0	0	0	0	0	0	0	0	0	0	0	0	0	0	0	0	0	0	0	0	0	0	0	0	0
Bacteria/Acidobacteria/Holophagae/Holophagales/Holophagaceae/Geothrix	0	0	0	0	0	0	0	0	0	0	0	0	0	0	0	0	0	0	0	0	0	0	0	0	0	0	0	0	0	0	0	0	0	0	0	0	0	0	0	0	0	0	0	0	0
Bacteria/Acidobacteria/Holophagae/Holophagales/Holophagaceae/Holophaga	0	0	0	0	0	0	0	0	0	0	0	0	0	0	0	0	0	0	0	0	0	0	0	0	0	0	0	0	0	0	0	0	0	0	0	0	0	0	0	0	0	0	0	0	0
Bacteria/Acidobacteria/Holophagae/Holophagales/Holophagaceae/marine group	0	0	0	0	0	0	0	0	0	0	0	0	0	0	0	0	0	0	0	0	0	0	0	0	0	0	0	0	0	0	0	0	0	0	0	0	0	0	0	0	0	0	0	0	0
Bacteria/Acidobacteria/Holophagae/Holophagales/Holophagaceae/uncultured	0	0	0	0	0	0	0	0	0	0	0	0	0	0	0	0	0	0	0	0	0	0	0	0	0	0	0	0	0	0	0	0	0	0	0	0	0	0	0	0	0	0	0	0	0
Bacteria/Acidobacteria/Subgroup 6/Unknown Order/Unknown Family/Luteitalea	0	0	0	0	0	0	0	0	0	0	0	0	0	0	0	0	0	0	0	0	0	0	0	0	0	0	0	0	0	0	0	0	0	0	0	0	0	0	0	0	0	0	0	0	0
Bacteria/Acidobacteria/Subgroup 6/Unknown Order/Unknown Family/Vicinamibacter	0	0	0	0	0	0	0	0	0	0	0	0	0	0	0	0	0	0	0	0	0	0	0	0	0	0	0	0	0	0	0	0	0	0	0	0	0	0	0	0	0	0	0	0	0
Bacteria/Acidobacteria/Thermoanaerobaculia/Thermoanaerobaculales/Thermoanaerobaculaceae/B276-D12	0	0	0	0	0	0	0	0	0	0	0	0	0	0	0	0	0	0	0	0	0	0	0	0	0	0	0	0	0	0	0	0	0	0	0	0	0	0	0	0	0	0	0	0	0
Bacteria/Acidobacteria/Thermoanaerobaculia/Thermoanaerobaculales/Thermoanaerobaculaceae/Subgroup 10	28	0	0	0	0	26	97	63	65	23	0	0	43	0	29	68	102	66	37	55	24	49	65	52	0	24	43	92	39	79	70	65	73	115	116	64	71	50	65	152	143	139	108	117	94
Bacteria/Acidobacteria/Thermoanaerobaculia/Thermoanaerobaculales/Thermoanaerobaculaceae/Subgroup 23	333	220	150	208	122	159	337	198	163	105	165	123	179	174	187	208	311	198	194	196	173	175	231	182	179	204	230	242	167	181	145	171	138	191	236	211	153	180	169	115	120	110	178	191	189
Bacteria/Acidobacteria/Thermoanaerobaculia/Thermoanaerobaculales/Thermoanaerobaculaceae/Thermoanaerobaculum	0	0	0	0	0	0	0	0	0	0	0	0	0	0	0	0	0	0	0	0	0	0	0	0	0	0	0	0	0	0	0	0	0	0	0	0	0	0	0	0	0	0	0	0	0
Bacteria/Acidobacteria/Thermoanaerobaculia/Thermoanaerobaculales/Thermoanaerobaculaceae/TPD-58	28	0	0	0	0	0	0	0	0	0	0	0	0	0	0	0	0	0	0	0	12	0	0	0	0	0	0	0	0	0	0	0	0	0	0	0	0	0	0	0	0	0	0	0	0
Bacteria/Actinobacteria/Acidimicrobiia/Acidimicrobiales/Acidimicrobiaceae/Acidithrix	0	0	0	0	0	0	0	0	0	0	0	0	0	0	0	0	0	0	0	0	0	0	0	0	0	0	0	0	0	0	0	0	0	0	0	0	0	0	0	0	0	0	0	0	0
Bacteria/Actinobacteria/Acidimicrobiia/Acidimicrobiales/Acidimicrobiaceae/Ferrimicrobium	0	0	0	0	0	0	0	0	0	0	0	0	0	0	0	0	0	0	0	0	0	0	0	0	0	0	0	0	0	0	0	0	0	0	0	0	0	0	0	0	0	0	0	0	0
Bacteria/Actinobacteria/Acidimicrobiia/Acidimicrobiales/Acidimicrobiaceae/Ferrithrix	0	0	0	0	0	0	0	0	0	0	0	0	0	0	0	0	0	0	0	0	0	0	0	0	0	0	0	0	0	0	0	0	0	0	0	0	0	0	0	0	0	0	0	0	0
Bacteria/Actinobacteria/Acidimicrobiia/Acidimicrobiales/Acidimicrobiaceae/uncultured	0	0	0	0	0	0	0	0	0	0	0	0	0	0	0	0	0	0	0	0	0	0	0	0	0	0	0	0	0	0	0	0	0	0	0	0	0	0	0	0	0	0	0	0	0
Bacteria/Actinobacteria/Acidimicrobiia/Actinomarinales/Actinomarinaceae/Candidatus Actinomarina	0	0	0	0	0	0	0	0	0	0	0	0	0	0	0	0	0	0	0	0	0	0	0	0	0	0	0	0	0	0	0	0	0	0	0	0	0	0	0	0	0	0	0	0	0
Bacteria/Actinobacteria/Acidimicrobiia/Microtrichales/Iamiaceae/Iamia	0	0	0	0	0	0	0	0	0	0	0	0	0	0	0	0	0	0	0	0	0	0	0	0	0	0	0	0	0	0	0	0	0	0	0	0	0	0	0	0	0	0	0	0	0
Bacteria/Actinobacteria/Acidimicrobiia/Microtrichales/Ilumatobacteraceae/CL500-29 marine group	0	0	0	0	0	0	0	0	0	0	0	0	0	0	0	0	0	0	0	0	0	0	0	0	0	0	0	0	0	0	0	0	0	0	0	0	0	0	0	0	0	0	0	0	0
Bacteria/Actinobacteria/Acidimicrobiia/Microtrichales/Ilumatobacteraceae/Ilumatobacter	150	70	63	69	32	70	111	77	119	47	51	49	103	75	86	81	96	47	48	88	75	136	115	137	136	136	132	158	105	145	93	83	90	167	113	203	132	122	112	92	86	65	81	91	91
Bacteria/Actinobacteria/Acidimicrobiia/Microtrichales/Ilumatobacteraceae/uncultured	0	0	0	0	0	0	0	0	0	0	0	0	0	0	0	0	0	0	0	0	0	0	0	0	0	0	0	0	0	0	0	0	0	0	0	0	0	0	0	0	0	0	0	0	0
Bacteria/Actinobacteria/Acidimicrobiia/Microtrichales/Microtrichaceae/Candidatus Microthrix	0	0	0	0	0	0	0	0	0	0	0	0	0	0	0	0	0	0	0	0	0	0	0	0	0	0	0	0	0	0	0	0	0	0	0	0	0	0	0	0	0	0	0	0	0
Bacteria/Actinobacteria/Acidimicrobiia/Microtrichales/Microtrichaceae/IMCC26207	0	0	0	0	0	0	0	0	0	0	0	0	0	0	0	0	0	0	0	0	0	0	0	0	0	0	0	0	0	0	0	0	0	0	0	0	0	0	0	0	0	0	0	0	0
Bacteria/Actinobacteria/Acidimicrobiia/Microtrichales/Microtrichaceae/Sva0996 marine group	0	0	0	0	0	0	0	0	0	0	0	0	0	0	0	0	0	0	0	0	0	0	0	0	0	0	0	0	0	0	0	0	0	0	0	0	0	0	0	0	0	0	0	0	0
Bacteria/Actinobacteria/Acidimicrobiia/Microtrichales/Microtrichaceae/uncultured	0	0	0	0	0	0	0	0	0	0	0	0	0	0	0	0	0	0	0	0	0	0	0	0	0	0	0	0	0	0	0	0	0	0	0	0	0	0	0	0	0	0	0	0	0
Bacteria/Actinobacteria/Actinobacteria/Actinomycetales/Actinomycetaceae/Actinomyces	0	0	0	0	0	0	0	0	0	0	0	0	0	0	0	0	0	0	0	0	0	0	0	0	0	0	0	0	0	0	0	0	0	0	0	0	0	0	0	0	0	0	0	0	0
Bacteria/Actinobacteria/Actinobacteria/Actinomycetales/Actinomycetaceae/Flaviflexus	0	0	0	0	0	0	0	0	0	0	0	0	0	0	0	0	0	0	0	0	0	0	0	0	0	0	0	0	0	0	0	0	0	0	0	0	0	0	0	0	0	0	0	0	0
Bacteria/Actinobacteria/Actinobacteria/Actinomycetales/Actinomycetaceae/Trueperella	0	0	0	0	0	0	0	0	0	0	0	0	0	0	0	0	0	0	0	0	0	0	0	0	0	0	0	0	0	0	0	0	0	0	0	0	0	0	0	0	0	0	0	0	0
Bacteria/Actinobacteria/Actinobacteria/Actinomycetales/Actinomycetaceae/Varibaculum	0	0	0	0	0	0	0	0	0	0	0	0	0	0	0	0	0	0	0	0	0	0	0	0	0	0	0	0	0	0	0	0	0	0	0	0	0	0	0	0	0	0	0	0	0
Bacteria/Actinobacteria/Actinobacteria/Actinomycetales/Actinomycetales Incertae Sedis/Candidatus Ancillula	0	0	0	0	0	0	0	0	0	0	0	0	0	0	0	0	0	0	0	0	0	0	0	0	0	0	0	0	0	0	0	0	0	0	0	0	0	0	0	0	0	0	0	0	0
Bacteria/Actinobacteria/Actinobacteria/Bifidobacteriales/Bifidobacteriaceae/Aeriscardovia	0	0	0	0	0	0	0	0	0	0	0	0	0	0	0	0	0	0	0	0	0	0	0	0	0	0	0	0	0	0	0	0	0	0	0	0	0	0	0	0	0	0	0	0	0
Bacteria/Actinobacteria/Actinobacteria/Bifidobacteriales/Bifidobacteriaceae/Bifidobacterium	0	0	0	0	0	0	0	0	0	0	0	0	0	0	0	0	0	0	0	0	0	0	0	0	0	0	0	0	0	0	0	0	0	0	0	0	0	0	0	0	0	0	0	0	0
Bacteria/Actinobacteria/Actinobacteria/Bifidobacteriales/Bifidobacteriaceae/Gardnerella	0	0	0	0	0	0	0	0	0	0	0	0	0	0	0	0	0	0	0	0	0	0	0	0	0	0	0	0	0	0	0	0	0	0	0	0	0	0	0	0	0	0	0	0	0
Bacteria/Actinobacteria/Actinobacteria/Catenulisporales/Actinospicaceae/Actinospica	0	0	0	0	0	0	0	0	0	0	0	0	0	0	0	0	0	0	0	0	0	0	0	0	0	0	0	0	0	0	0	0	0	0	0	0	0	0	0	0	0	0	0	0	0
Bacteria/Actinobacteria/Actinobacteria/Corynebacteriales/Corynebacteriaceae/Corynebacterium 1	0	0	0	0	0	0	0	0	0	0	0	0	0	0	0	0	0	0	0	0	0	0	0	0	0	0	0	0	0	0	0	0	0	0	0	0	0	0	0	0	0	0	0	0	0
Bacteria/Actinobacteria/Actinobacteria/Corynebacteriales/Corynebacteriaceae/Corynebacterium	0	0	0	0	0	0	0	0	0	0	0	0	0	0	0	0	0	0	0	0	0	0	0	0	0	0	0	0	0	0	0	0	0	0	0	0	0	0	0	0	0	0	0	0	0
Bacteria/Actinobacteria/Actinobacteria/Corynebacteriales/Corynebacteriaceae/Lawsonella	0	0	0	0	0	0	0	0	0	0	0	0	0	0	0	0	0	0	0	0	0	0	0	0	0	0	0	0	0	0	0	0	0	0	0	0	0	0	0	0	0	0	0	0	0
Bacteria/Actinobacteria/Actinobacteria/Corynebacteriales/Dietziaceae/Dietzia	0	0	0	0	0	0	0	0	0	0	0	0	0	0	0	0	0	0	0	0	0	0	0	0	0	0	0	0	0	0	0	0	0	0	0	0	0	0	0	0	0	0	0	0	0
Bacteria/Actinobacteria/Actinobacteria/Corynebacteriales/Mycobacteriaceae/Mycobacterium	97	0	0	0	0	0	0	0	0	0	0	0	0	0	0	0	0	0	0	0	0	0	0	152	0	130	89	0	0	0	0	0	0	87	0	0	0	0	0	0	0	0	0	0	0
Bacteria/Actinobacteria/Actinobacteria/Corynebacteriales/Nocardiaceae/Gordonia	0	0	0	0	0	0	0	0	0	0	0	0	0	0	0	0	0	0	0	0	0	0	0	0	0	0	0	0	0	0	0	0	0	0	0	0	0	0	0	0	0	0	0	0	0
Bacteria/Actinobacteria/Actinobacteria/Corynebacteriales/Nocardiaceae/Nocardia	0	0	0	0	0	0	0	0	0	0	0	0	0	0	0	0	0	0	0	0	0	0	0	0	0	0	0	0	0	0	0	0	0	0	0	0	0	0	0	0	0	0	0	0	0
Bacteria/Actinobacteria/Actinobacteria/Corynebacteriales/Nocardiaceae/Rhodococcus	0	0	0	0	0	0	0	0	0	0	0	0	0	0	0	0	0	0	0	0	0	0	0	0	0	0	0	0	0	0	0	0	0	0	0	0	0	0	0	0	0	0	0	0	0
Bacteria/Actinobacteria/Actinobacteria/Corynebacteriales/Nocardiaceae/Williamsia	0	0	0	0	0	0	0	0	0	0	0	0	0	0	0	0	0	0	0	0	0	0	0	0	0	0	0	0	0	0	0	0	0	0	0	0	0	0	0	0	0	0	0	0	0
Bacteria/Actinobacteria/Actinobacteria/Corynebacteriales/Tsukamurellaceae/Tsukamurella	0	0	0	0	0	0	0	0	0	0	0	0	0	0	0	0	0	0	0	0	0	0	0	0	0	0	0	0	0	0	0	0	0	0	0	0	0	0	0	0	0	0	0	0	0
Bacteria/Actinobacteria/Actinobacteria/Frankiales/Acidothermaceae/Acidothermus	0	0	0	0	0	0	0	0	0	0	0	0	0	0	0	0	0	0	0	0	0	0	0	0	0	0	0	0	0	0	0	0	0	0	0	0	0	0	0	0	0	0	0	0	0
Bacteria/Actinobacteria/Actinobacteria/Frankiales/Cryptosporangiaceae/Cryptosporangium	0	0	0	0	0	0	0	0	0	0	0	0	0	0	0	0	0	0	0	0	0	0	0	0	0	0	0	0	0	0	0	0	0	0	0	0	0	0	0	0	0	0	0	0	0
Bacteria/Actinobacteria/Actinobacteria/Frankiales/Cryptosporangiaceae/Fodinicola	0	0	0	0	0	0	0	0	0	0	0	0	0	0	0	0	0	0	0	0	0	0	0	0	41	60	45	0	0	57	0	0	0	0	0	65	0	0	0	0	0	0	0	0	0
Bacteria/Actinobacteria/Actinobacteria/Frankiales/Frankiaceae/Frankia	0	0	0	0	0	0	0	0	0	0	0	0	0	0	0	0	0	0	0	0	0	0	0	0	0	0	0	0	0	0	0	0	0	0	0	0	0	0	0	0	0	0	0	0	0
Bacteria/Actinobacteria/Actinobacteria/Frankiales/Frankiaceae/Jatrophihabitans	0	0	0	0	0	0	0	0	0	0	0	0	0	0	0	0	0	0	0	0	0	0	0	0	0	0	0	0	0	0	0	0	0	0	0	0	0	0	0	0	0	0	0	0	0
Bacteria/Actinobacteria/Actinobacteria/Frankiales/Geodermatophilaceae/Antricoccus	0	0	0	0	0	0	0	0	0	0	0	0	0	0	0	0	0	0	0	0	0	0	0	0	0	0	0	0	0	0	0	0	0	0	0	0	0	0	0	0	0	0	0	0	0
Bacteria/Actinobacteria/Actinobacteria/Frankiales/Geodermatophilaceae/Blastococcus	0	0	0	0	0	0	0	0	0	0	0	0	0	0	0	0	0	0	0	0	0	0	0	0	0	0	0	0	0	0	0	0	0	0	0	0	0	0	0	0	0	0	0	0	0
Bacteria/Actinobacteria/Actinobacteria/Frankiales/Geodermatophilaceae/Geodermatophilus	0	0	0	0	0	0	0	0	0	0	0	0	0	0	0	0	0	0	0	0	0	0	0	0	0	0	0	0	0	0	0	0	0	0	0	0	0	0	0	0	0	0	0	0	0
Bacteria/Actinobacteria/Actinobacteria/Frankiales/Geodermatophilaceae/Modestobacter	0	0	0	0	0	0	0	0	0	0	0	0	0	0	0	0	0	0	0	0	0	0	0	0	0	0	0	0	0	0	0	0	0	0	0	0	0	0	0	0	0	0	0	0	0
Bacteria/Actinobacteria/Actinobacteria/Frankiales/Nakamurellaceae/Nakamurella	0	0	0	0	0	0	0	0	0	0	0	0	0	0	0	0	0	0	0	0	0	0	0	0	0	0	0	0	0	0	0	0	0	0	0	0	0	0	0	0	0	0	0	0	0
Bacteria/Actinobacteria/Actinobacteria/Frankiales/Sporichthyaceae/Candidatus Planktophila	0	0	0	0	0	0	0	0	0	0	0	0	0	0	0	0	0	0	0	0	0	0	0	0	0	0	0	0	0	0	0	0	0	0	0	0	0	0	0	0	0	0	0	0	0
Bacteria/Actinobacteria/Actinobacteria/Frankiales/Sporichthyaceae/hgcI clade	0	0	0	0	0	0	0	0	0	0	0	0	0	0	0	0	0	0	0	0	0	0	0	0	0	0	0	0	0	0	0	0	0	0	0	0	0	0	0	0	0	0	0	0	0
Bacteria/Actinobacteria/Actinobacteria/Frankiales/Sporichthyaceae/Sporichthya	0	0	0	0	0	0	0	0	0	0	0	0	0	0	0	0	0	0	0	0	0	0	0	0	0	0	0	0	0	0	0	0	0	0	0	0	0	0	0	0	0	0	0	0	0
Bacteria/Actinobacteria/Actinobacteria/Frankiales/Sporichthyaceae/uncultured	0	0	0	0	0	0	0	0	0	0	0	0	0	0	0	0	0	0	0	0	0	0	0	0	0	0	0	0	0	0	0	0	0	0	0	0	0	0	0	0	0	0	0	0	0
Bacteria/Actinobacteria/Actinobacteria/Glycomycetales/Glycomycetaceae/Glycomyces	0	0	0	0	0	0	0	0	0	0	0	0	0	0	0	0	0	0	0	0	0	0	0	0	0	0	0	0	0	0	0	0	0	0	0	0	0	0	0	0	0	0	0	0	0
Bacteria/Actinobacteria/Actinobacteria/Glycomycetales/Glycomycetaceae/uncultured	0	0	0	0	0	0	0	0	0	0	0	0	0	0	0	0	0	0	0	0	0	0	0	0	0	0	0	0	0	0	0	0	0	0	0	0	0	0	0	0	0	0	0	0	0
Bacteria/Actinobacteria/Actinobacteria/Kineosporiales/Kineosporiaceae/Kineococcus	0	0	0	0	0	0	0	0	0	0	0	0	0	0	0	0	0	0	0	0	0	0	0	0	0	0	0	0	0	0	0	0	0	0	0	0	0	0	0	0	0	0	0	0	0
Bacteria/Actinobacteria/Actinobacteria/Kineosporiales/Kineosporiaceae/Kineosporia	0	0	0	0	0	0	0	0	0	0	0	0	0	0	0	0	0	0	0	0	0	0	0	0	0	0	0	0	0	0	0	0	0	0	0	0	0	0	0	0	0	0	0	0	0
Bacteria/Actinobacteria/Actinobacteria/Kineosporiales/Kineosporiaceae/Quadrisphaera	0	0	0	0	0	0	0	0	0	0	0	0	0	0	0	0	0	0	0	0	0	0	0	0	0	0	0	0	0	0	0	0	0	0	0	0	0	0	0	0	0	0	0	0	0
Bacteria/Actinobacteria/Actinobacteria/Kineosporiales/Kineosporiaceae/uncultured	0	0	0	0	0	0	0	0	0	0	0	0	0	0	0	0	0	0	0	0	0	0	0	0	0	0	0	0	0	0	0	0	0	0	0	0	0	0	0	0	0	0	0	0	0
Bacteria/Actinobacteria/Actinobacteria/Micrococcales/Beutenbergiaceae/Miniimonas	0	0	0	0	0	0	0	0	0	0	0	0	0	0	0	0	0	0	0	0	0	0	0	0	0	0	0	0	0	0	0	0	0	0	0	0	0	0	0	0	0	0	0	0	0
Bacteria/Actinobacteria/Actinobacteria/Micrococcales/Bogoriellaceae/Georgenia	0	0	0	0	0	0	0	0	0	0	0	0	0	0	0	0	0	0	0	0	0	0	0	0	0	0	0	0	0	0	0	0	0	0	0	0	0	0	0	0	0	0	0	0	0
Bacteria/Actinobacteria/Actinobacteria/Micrococcales/Brevibacteriaceae/Brevibacterium	0	0	0	0	0	0	0	0	0	0	0	0	0	0	0	0	0	0	0	0	0	0	0	0	0	0	0	0	0	0	0	0	0	0	0	0	0	0	0	0	0	0	0	0	0
Bacteria/Actinobacteria/Actinobacteria/Micrococcales/Cellulomonadaceae/Actinotalea	0	0	0	0	0	0	0	0	0	0	0	0	0	0	0	0	0	0	0	0	0	0	0	0	0	0	0	0	0	0	0	0	0	0	0	0	0	0	0	0	0	0	0	0	0
Bacteria/Actinobacteria/Actinobacteria/Micrococcales/Cellulomonadaceae/Cellulomonas	0	0	0	0	0	0	0	0	0	0	0	0	0	0	0	0	0	0	0	0	0	0	0	0	0	0	0	0	0	0	0	0	0	0	0	0	0	0	0	0	0	0	0	0	0
Bacteria/Actinobacteria/Actinobacteria/Micrococcales/Cellulomonadaceae/Pseudactinotalea	0	0	0	0	0	0	0	0	0	0	0	0	0	0	0	0	0	0	0	0	0	0	0	0	0	0	0	0	0	0	0	0	0	0	0	0	0	0	0	0	0	0	0	0	0
Bacteria/Actinobacteria/Actinobacteria/Micrococcales/Cellulomonadaceae/Tropheryma	0	0	0	0	0	0	0	0	0	0	0	0	0	0	0	0	0	0	0	0	0	0	0	0	0	0	0	0	0	0	0	0	0	0	0	0	0	0	0	0	0	0	0	0	0
Bacteria/Actinobacteria/Actinobacteria/Micrococcales/Demequinaceae/Demequina	0	0	0	0	0	0	0	0	0	0	0	0	0	0	0	0	0	0	0	0	0	0	0	0	0	0	0	0	0	0	0	0	0	0	0	0	0	0	0	0	0	0	0	0	0
Bacteria/Actinobacteria/Actinobacteria/Micrococcales/Demequinaceae/Lysinimicrobium	0	0	0	0	0	0	0	0	0	0	0	0	0	0	0	0	0	0	0	0	0	0	0	0	0	0	0	0	0	0	0	0	0	0	0	0	0	0	0	0	0	0	0	0	0
Bacteria/Actinobacteria/Actinobacteria/Micrococcales/Dermabacteraceae/Brachybacterium	0	0	0	0	0	0	0	0	0	0	0	0	0	0	0	0	0	0	0	0	0	0	0	0	0	0	0	0	0	0	0	0	0	0	0	0	0	0	0	0	0	0	0	0	0
Bacteria/Actinobacteria/Actinobacteria/Micrococcales/Dermabacteraceae/Dermabacter	0	0	0	0	0	0	0	0	0	0	0	0	0	0	0	0	0	0	0	0	0	0	0	0	0	0	0	0	0	0	0	0	0	0	0	0	0	0	0	0	0	0	0	0	0
Bacteria/Actinobacteria/Actinobacteria/Micrococcales/Dermabacteraceae/uncultured	0	0	0	0	0	0	0	0	0	0	0	0	0	0	0	0	0	0	0	0	0	0	0	0	0	0	0	0	0	0	0	0	0	0	0	0	0	0	0	0	0	0	0	0	0
Bacteria/Actinobacteria/Actinobacteria/Micrococcales/Dermacoccaceae/Dermacoccus	0	0	0	0	0	0	0	0	0	0	0	0	0	0	0	0	0	0	0	0	0	0	0	0	0	0	0	0	0	0	0	0	0	0	0	0	0	0	0	0	0	0	0	0	0
Bacteria/Actinobacteria/Actinobacteria/Micrococcales/Dermatophilaceae/uncultured	0	0	0	0	0	0	0	0	0	0	0	0	0	0	0	0	0	0	0	0	0	0	0	0	0	0	0	0	0	0	0	0	0	0	0	0	0	0	0	0	0	0	0	0	0
Bacteria/Actinobacteria/Actinobacteria/Micrococcales/Intrasporangiaceae/Janibacter	0	0	0	0	0	0	0	0	0	0	0	0	0	0	0	0	0	0	0	0	0	0	0	0	0	0	0	0	0	0	0	0	0	0	0	0	0	0	0	0	0	0	0	0	0
Bacteria/Actinobacteria/Actinobacteria/Micrococcales/Intrasporangiaceae/Ornithinicoccus	0	0	0	0	0	0	0	0	0	0	0	0	0	0	0	0	0	0	0	0	0	0	0	0	0	0	0	0	0	0	0	0	0	0	0	0	0	0	0	0	0	0	0	0	0
Bacteria/Actinobacteria/Actinobacteria/Micrococcales/Intrasporangiaceae/Ornithinimicrobium	0	0	0	0	0	0	0	0	0	0	0	0	0	0	0	0	0	0	0	0	0	0	0	0	0	0	0	0	0	0	0	0	0	0	0	0	0	0	0	0	0	0	0	0	0
Bacteria/Actinobacteria/Actinobacteria/Micrococcales/Intrasporangiaceae/Tetrasphaera	0	0	0	0	0	0	0	0	0	0	0	0	0	0	0	0	0	0	0	0	0	0	0	0	0	0	0	0	0	0	0	0	0	0	0	0	0	0	0	0	0	0	0	0	0
Bacteria/Actinobacteria/Actinobacteria/Micrococcales/Intrasporangiaceae/uncultured	0	0	0	0	0	0	0	0	0	0	0	0	0	0	0	0	0	0	0	0	0	0	0	0	0	0	0	0	0	0	0	0	0	0	0	0	0	0	0	0	0	0	0	0	0
Bacteria/Actinobacteria/Actinobacteria/Micrococcales/Microbacteriaceae/Agrococcus	0	0	0	0	0	0	0	0	0	0	0	0	0	0	0	0	0	0	0	0	0	0	0	0	0	0	0	0	0	0	0	0	0	0	0	0	0	0	0	0	0	0	0	0	0
Bacteria/Actinobacteria/Actinobacteria/Micrococcales/Microbacteriaceae/Agromyces	0	0	0	0	0	0	0	0	0	0	0	0	0	0	0	0	0	0	0	0	0	0	0	0	0	0	0	0	0	0	0	0	0	0	0	0	0	0	0	0	0	0	0	0	0
Bacteria/Actinobacteria/Actinobacteria/Micrococcales/Microbacteriaceae/Amnibacterium	0	0	0	0	0	0	0	0	0	0	0	0	0	0	0	0	0	0	0	0	0	0	0	0	0	0	0	0	0	0	0	0	0	0	0	0	0	0	0	0	0	0	0	0	0
Bacteria/Actinobacteria/Actinobacteria/Micrococcales/Microbacteriaceae/Aurantimicrobium	0	0	0	0	0	0	0	0	0	0	0	0	0	0	0	0	0	0	0	0	0	0	0	0	0	0	0	0	0	0	0	0	0	0	0	0	0	0	0	0	0	0	0	0	0
Bacteria/Actinobacteria/Actinobacteria/Micrococcales/Microbacteriaceae/Candidatus Aquiluna	0	0	0	0	0	0	0	0	0	0	0	0	0	0	0	0	0	0	0	0	0	0	0	0	0	0	0	0	0	0	0	0	0	0	0	0	0	0	0	0	0	0	0	0	0
Bacteria/Actinobacteria/Actinobacteria/Micrococcales/Microbacteriaceae/Candidatus Limnoluna	0	0	0	0	0	0	0	0	0	0	0	0	0	0	0	0	0	0	0	0	0	0	0	0	0	0	0	0	0	0	0	0	0	0	0	0	0	0	0	0	0	0	0	0	0
Bacteria/Actinobacteria/Actinobacteria/Micrococcales/Microbacteriaceae/Candidatus Planktoluna	0	0	0	0	0	0	0	0	0	0	0	0	0	0	0	0	0	0	0	0	0	0	0	0	0	0	0	0	0	0	0	0	0	0	0	0	0	0	0	0	0	0	0	0	0
Bacteria/Actinobacteria/Actinobacteria/Micrococcales/Microbacteriaceae/CB31G03	0	0	0	0	0	0	0	0	0	0	0	0	0	0	0	0	0	0	0	0	0	0	0	0	0	0	0	0	0	0	0	0	0	0	0	0	0	0	0	0	0	0	0	0	0
Bacteria/Actinobacteria/Actinobacteria/Micrococcales/Microbacteriaceae/Chryseoglobus	0	0	0	0	0	0	0	0	0	0	0	0	0	0	0	0	0	0	0	0	0	0	0	0	0	0	0	0	0	0	0	0	0	0	0	0	0	0	0	0	0	0	0	0	0
Bacteria/Actinobacteria/Actinobacteria/Micrococcales/Microbacteriaceae/Clavibacter	0	0	0	0	0	0	0	0	0	0	0	0	0	0	0	0	0	0	0	0	0	0	0	0	0	0	0	0	0	0	0	0	0	0	0	0	0	0	0	0	0	0	0	0	0
Bacteria/Actinobacteria/Actinobacteria/Micrococcales/Microbacteriaceae/Curtobacterium	0	0	0	0	0	0	0	0	0	0	0	0	0	0	0	0	0	0	0	0	0	0	0	0	0	0	0	0	0	0	0	0	0	0	0	0	0	0	0	0	0	0	0	0	0
Bacteria/Actinobacteria/Actinobacteria/Micrococcales/Microbacteriaceae/DS001	0	0	0	0	0	0	0	0	0	0	0	0	0	0	0	0	0	0	0	0	0	0	0	0	0	0	0	0	0	0	0	0	0	0	0	0	0	0	0	0	0	0	0	0	0
Bacteria/Actinobacteria/Actinobacteria/Micrococcales/Microbacteriaceae/Galbitalea	0	0	0	0	0	0	0	0	0	0	0	0	0	0	0	0	0	0	0	0	0	0	0	0	0	0	0	0	0	0	0	0	0	0	0	0	0	0	0	0	0	0	0	0	0
Bacteria/Actinobacteria/Actinobacteria/Micrococcales/Microbacteriaceae/Herbiconiux	0	0	0	0	0	0	0	0	0	0	0	0	0	0	0	0	0	0	0	0	0	0	0	0	0	0	0	0	0	0	0	0	0	0	0	0	0	0	0	0	0	0	0	0	0
Bacteria/Actinobacteria/Actinobacteria/Micrococcales/Microbacteriaceae/Leifsonia	0	0	0	0	0	0	0	0	0	0	0	0	0	0	0	0	0	0	0	0	0	0	0	0	0	0	0	0	0	0	0	0	0	0	0	0	0	0	0	0	0	0	0	0	0
Bacteria/Actinobacteria/Actinobacteria/Micrococcales/Microbacteriaceae/Leucobacter	0	0	0	0	0	0	0	0	0	0	0	0	0	0	0	0	0	0	0	0	0	0	0	0	0	0	0	0	0	0	0	0	0	0	0	0	0	0	0	0	0	0	0	0	0
Bacteria/Actinobacteria/Actinobacteria/Micrococcales/Microbacteriaceae/Microbacterium	0	0	0	0	0	0	0	0	0	0	0	0	0	0	0	0	0	0	0	0	0	0	0	0	0	0	0	0	0	0	0	0	0	0	0	0	0	0	0	0	0	0	0	0	0
Bacteria/Actinobacteria/Actinobacteria/Micrococcales/Microbacteriaceae/ML602J-51	0	0	0	0	0	0	0	0	0	0	0	0	0	0	0	0	0	0	0	0	0	0	0	0	0	0	0	0	0	0	0	0	0	0	0	0	0	0	0	0	0	0	0	0	0
Bacteria/Actinobacteria/Actinobacteria/Micrococcales/Microbacteriaceae/MWH-Ta3	0	0	0	0	0	0	0	0	0	0	0	0	0	0	0	0	0	0	0	0	0	0	0	0	0	0	0	0	0	0	0	0	0	0	0	0	0	0	0	0	0	0	0	0	0
Bacteria/Actinobacteria/Actinobacteria/Micrococcales/Microbacteriaceae/Parafrigoribacterium	0	0	0	0	0	0	0	0	0	0	0	0	0	0	0	0	0	0	0	0	0	0	0	0	0	0	0	0	0	0	0	0	0	0	0	0	0	0	0	0	0	0	0	0	0
Bacteria/Actinobacteria/Actinobacteria/Micrococcales/Microbacteriaceae/Pseudoclavibacter	0	0	0	0	0	0	0	0	0	0	0	0	0	0	0	0	0	0	0	0	0	0	0	0	0	0	0	0	0	0	0	0	0	0	0	0	0	0	0	0	0	0	0	0	0
Bacteria/Actinobacteria/Actinobacteria/Micrococcales/Microbacteriaceae/Rathayibacter	0	0	0	0	0	0	0	0	0	0	0	0	0	0	0	0	0	0	0	0	0	0	0	0	0	0	0	0	0	0	0	0	0	0	0	0	0	0	0	0	0	0	0	0	0
Bacteria/Actinobacteria/Actinobacteria/Micrococcales/Microbacteriaceae/uncultured	0	0	0	0	0	0	0	0	0	0	0	0	0	0	0	0	0	0	0	0	0	0	0	0	0	0	0	0	0	0	0	0	0	0	0	0	0	0	0	0	0	0	0	0	0
Bacteria/Actinobacteria/Actinobacteria/Micrococcales/Microbacteriaceae/XZXXH163	0	0	0	0	0	0	0	0	0	0	0	0	0	0	0	0	0	0	0	0	0	0	0	0	0	0	0	0	0	0	0	0	0	0	0	0	0	0	0	0	0	0	0	0	0
Bacteria/Actinobacteria/Actinobacteria/Micrococcales/Micrococcaceae/Arthrobacter	0	0	0	0	0	0	0	0	0	0	0	0	0	0	0	0	0	0	0	0	0	0	0	0	0	0	0	0	0	0	0	0	0	0	0	0	0	0	0	0	0	0	0	0	0
Bacteria/Actinobacteria/Actinobacteria/Micrococcales/Micrococcaceae/Enteractinococcus	0	0	0	0	0	0	0	0	0	0	0	0	0	0	0	0	0	0	0	0	0	0	0	0	0	0	0	0	0	0	0	0	0	0	0	0	0	0	0	0	0	0	0	0	0
Bacteria/Actinobacteria/Actinobacteria/Micrococcales/Micrococcaceae/Glutamicibacter	0	0	0	0	0	0	0	0	0	0	0	0	0	0	0	0	0	0	0	0	0	0	0	0	0	0	0	0	0	0	0	0	0	0	0	0	0	0	0	0	0	0	0	0	0
Bacteria/Actinobacteria/Actinobacteria/Micrococcales/Micrococcaceae/Kocuria	0	0	0	0	0	0	0	0	0	0	0	0	0	0	0	0	0	0	0	0	0	0	0	0	0	0	0	0	0	0	0	0	0	0	0	0	0	0	0	0	0	0	0	0	0
Bacteria/Actinobacteria/Actinobacteria/Micrococcales/Micrococcaceae/Micrococcus	0	0	0	0	0	0	0	0	0	0	0	0	0	0	0	0	0	0	0	0	0	0	0	0	0	0	0	0	0	0	0	0	0	0	0	0	0	0	0	0	0	0	0	0	0
Bacteria/Actinobacteria/Actinobacteria/Micrococcales/Micrococcaceae/Nesterenkonia	0	0	0	0	0	0	0	0	0	0	0	0	0	0	0	0	0	0	0	0	0	0	0	0	0	0	0	0	0	0	0	0	0	0	0	0	0	0	0	0	0	0	0	0	0
Bacteria/Actinobacteria/Actinobacteria/Micrococcales/Micrococcaceae/Paenarthrobacter	0	0	0	0	0	0	0	0	0	0	0	0	0	0	0	0	0	0	0	0	0	0	0	0	0	0	0	0	0	0	0	0	0	0	0	0	0	0	0	0	0	0	0	0	0
Bacteria/Actinobacteria/Actinobacteria/Micrococcales/Micrococcaceae/Paeniglutamicibacter	0	0	0	0	0	0	0	0	0	0	0	0	0	0	0	0	0	0	0	0	0	0	0	0	0	0	0	0	0	0	0	0	0	0	0	0	0	0	0	0	0	0	0	0	0
Bacteria/Actinobacteria/Actinobacteria/Micrococcales/Micrococcaceae/Pseudarthrobacter	0	0	0	0	0	0	0	0	0	0	0	0	0	0	0	0	0	0	0	0	0	0	0	0	0	0	0	0	0	0	0	0	0	0	0	0	0	0	0	0	0	0	0	0	0
Bacteria/Actinobacteria/Actinobacteria/Micrococcales/Micrococcaceae/Rothia	0	0	0	0	0	0	0	0	0	0	0	0	0	0	0	0	0	0	0	0	0	0	0	0	0	0	0	0	0	0	0	0	0	0	0	0	0	0	0	0	0	0	0	0	0
Bacteria/Actinobacteria/Actinobacteria/Micrococcales/Micrococcales Incertae Sedis/Timonella	0	0	0	0	0	0	0	0	0	0	0	0	0	0	0	0	0	0	0	0	0	0	0	0	0	0	0	0	0	0	0	0	0	0	0	0	0	0	0	0	0	0	0	0	0
Bacteria/Actinobacteria/Actinobacteria/Micrococcales/Promicromonosporaceae/Cellulosimicrobium	0	0	0	0	0	0	0	0	0	0	0	0	0	0	0	0	0	0	0	0	0	0	0	0	0	0	0	0	0	0	0	0	0	0	0	0	0	0	0	0	0	0	0	0	0
Bacteria/Actinobacteria/Actinobacteria/Micrococcales/Promicromonosporaceae/uncultured	0	0	0	0	0	0	0	0	0	0	0	0	0	0	0	0	0	0	0	0	0	0	0	0	0	0	0	0	0	0	0	0	0	0	0	0	0	0	0	0	0	0	0	0	0
Bacteria/Actinobacteria/Actinobacteria/Micrococcales/Sanguibacteraceae/Sanguibacter	0	0	0	0	0	0	0	0	0	0	0	0	0	0	0	0	0	0	0	0	0	0	0	0	0	0	0	0	0	0	0	0	0	0	0	0	0	0	0	0	0	0	0	0	0
Bacteria/Actinobacteria/Actinobacteria/Micromonosporales/Micromonosporaceae/Actinoplanes	0	0	0	0	0	0	0	0	0	0	0	0	0	0	0	0	0	0	0	0	0	0	0	0	0	0	0	0	0	0	0	0	0	0	0	0	0	0	0	0	0	0	0	0	0
Bacteria/Actinobacteria/Actinobacteria/Micromonosporales/Micromonosporaceae/Asanoa	0	0	0	0	0	0	0	0	0	0	0	0	0	0	0	0	0	0	0	0	0	0	0	0	0	0	0	0	0	0	0	0	0	0	0	0	0	0	0	0	0	0	0	0	0
Bacteria/Actinobacteria/Actinobacteria/Micromonosporales/Micromonosporaceae/Catellatospora	0	0	0	0	0	0	0	0	0	0	0	0	0	0	0	0	0	0	0	0	0	0	0	0	0	0	0	0	0	0	0	0	0	0	0	0	0	0	0	0	0	0	0	0	0
Bacteria/Actinobacteria/Actinobacteria/Micromonosporales/Micromonosporaceae/Luedemannella	0	0	0	0	0	0	0	0	0	0	0	0	0	0	0	0	0	0	0	0	0	0	0	0	0	0	0	0	0	0	0	0	0	0	0	0	0	0	0	0	0	0	0	0	0
Bacteria/Actinobacteria/Actinobacteria/Micromonosporales/Micromonosporaceae/Micromonospora	0	0	0	0	0	0	0	0	0	0	0	0	0	0	0	0	0	0	0	0	0	0	0	0	0	0	0	0	0	0	0	0	0	0	0	0	0	0	0	0	0	0	0	0	0
Bacteria/Actinobacteria/Actinobacteria/Micromonosporales/Micromonosporaceae/Salinispora	0	0	0	0	0	0	0	0	0	0	0	0	0	0	0	0	0	0	0	0	0	0	0	0	0	0	0	0	0	0	0	0	0	0	0	0	0	0	0	0	0	0	0	0	0
Bacteria/Actinobacteria/Actinobacteria/Micromonosporales/Micromonosporaceae/uncultured	0	0	0	0	0	0	0	0	0	0	0	0	0	0	0	0	0	0	0	0	0	0	0	0	0	0	0	0	0	0	0	0	0	0	0	0	0	0	0	0	0	0	0	0	0
Bacteria/Actinobacteria/Actinobacteria/Micromonosporales/Micromonosporaceae/Virgisporangium	0	0	0	0	0	0	0	0	0	0	0	0	0	0	0	0	0	0	0	0	0	0	0	0	0	0	0	0	0	0	0	0	0	0	0	0	0	0	0	0	0	0	0	0	0
Bacteria/Actinobacteria/Actinobacteria/Propionibacteriales/Nocardioidaceae/Actinopolymorpha	0	0	0	0	0	0	0	0	0	0	0	0	0	0	0	0	0	0	0	0	0	0	0	0	0	0	0	0	0	0	0	0	0	0	0	0	0	0	0	0	0	0	0	0	0
Bacteria/Actinobacteria/Actinobacteria/Propionibacteriales/Nocardioidaceae/Aeromicrobium	0	0	0	0	0	0	0	0	0	0	0	0	0	0	0	0	0	0	0	0	0	0	0	0	0	0	0	0	0	0	0	0	0	0	0	0	0	0	0	0	0	0	0	0	0
Bacteria/Actinobacteria/Actinobacteria/Propionibacteriales/Nocardioidaceae/Kribbella	0	0	0	0	0	0	0	0	0	0	0	0	0	0	0	0	0	0	0	0	0	0	0	0	0	0	0	0	0	0	0	0	0	0	0	0	0	0	0	0	0	0	0	0	0
Bacteria/Actinobacteria/Actinobacteria/Propionibacteriales/Nocardioidaceae/Marmoricola	0	0	0	0	0	0	0	0	0	0	0	0	0	0	0	0	0	0	0	0	0	0	0	0	0	0	0	0	0	0	0	0	0	0	0	0	0	0	0	0	0	0	0	0	0
Bacteria/Actinobacteria/Actinobacteria/Propionibacteriales/Nocardioidaceae/Nocardioides	0	0	0	0	0	0	0	0	0	0	0	0	0	0	0	0	0	0	0	0	0	0	0	0	0	0	0	0	0	0	0	0	0	0	0	0	0	0	0	0	0	0	0	0	0
Bacteria/Actinobacteria/Actinobacteria/Propionibacteriales/Nocardioidaceae/uncultured	0	0	0	0	0	0	0	0	0	0	0	0	0	0	0	0	0	0	0	0	0	0	0	0	0	0	0	0	0	0	0	0	0	0	0	0	0	0	0	0	0	0	0	0	0
Bacteria/Actinobacteria/Actinobacteria/Propionibacteriales/Propionibacteriaceae/Acidipropionibacterium	0	0	0	0	0	0	0	0	0	0	0	0	0	0	0	0	0	0	0	0	0	0	0	0	0	0	0	0	0	0	0	0	0	0	0	0	0	0	0	0	0	0	0	0	0
Bacteria/Actinobacteria/Actinobacteria/Propionibacteriales/Propionibacteriaceae/Aestuariimicrobium	0	0	0	0	0	0	0	0	0	0	0	0	0	0	0	0	0	0	0	0	0	0	0	0	0	0	0	0	0	0	0	0	0	0	0	0	0	0	0	0	0	0	0	0	0
Bacteria/Actinobacteria/Actinobacteria/Propionibacteriales/Propionibacteriaceae/Cutibacterium	0	0	0	0	0	0	0	0	0	0	0	0	0	0	0	0	0	0	0	0	0	0	0	0	0	0	0	0	0	0	0	0	0	0	0	0	0	0	0	0	0	0	0	0	0
Bacteria/Actinobacteria/Actinobacteria/Propionibacteriales/Propionibacteriaceae/Friedmanniella	0	0	0	0	0	0	0	0	0	0	0	0	0	0	0	0	0	0	0	0	0	0	0	0	0	0	0	0	0	0	0	0	0	0	0	0	0	0	0	0	0	0	0	0	0
Bacteria/Actinobacteria/Actinobacteria/Propionibacteriales/Propionibacteriaceae/Haloactinopolyspora	0	0	0	0	0	0	0	0	0	0	0	0	0	0	0	0	0	0	0	0	0	0	0	0	0	0	0	0	0	0	0	0	0	0	0	0	0	0	0	0	0	0	0	0	0
Bacteria/Actinobacteria/Actinobacteria/Propionibacteriales/Propionibacteriaceae/Luteococcus	0	0	0	0	0	0	0	0	0	0	0	0	0	0	0	0	0	0	0	0	0	0	0	0	0	0	0	0	0	0	0	0	0	0	0	0	0	0	0	0	0	0	0	0	0
Bacteria/Actinobacteria/Actinobacteria/Propionibacteriales/Propionibacteriaceae/Marinilutecoccus	0	0	0	0	0	0	0	0	0	0	0	0	0	0	0	0	0	0	0	0	0	0	0	0	0	0	0	0	0	0	0	0	0	0	0	0	0	0	0	0	0	0	0	0	0
Bacteria/Actinobacteria/Actinobacteria/Propionibacteriales/Propionibacteriaceae/Microlunatus	0	0	0	0	0	0	0	0	0	0	0	0	0	0	0	0	0	0	0	0	0	0	0	0	0	0	0	0	0	0	0	0	0	0	0	0	0	0	0	0	0	0	0	0	0
Bacteria/Actinobacteria/Actinobacteria/Propionibacteriales/Propionibacteriaceae/Phytoactinopolyspora	0	0	0	0	0	0	0	0	0	0	0	0	0	0	0	0	0	0	0	0	0	0	0	0	0	0	0	0	0	0	0	0	0	0	0	0	0	0	0	0	0	0	0	0	0
Bacteria/Actinobacteria/Actinobacteria/Propionibacteriales/Propionibacteriaceae/Propionibacterium	0	0	0	0	0	0	0	0	0	0	0	0	0	0	0	0	0	0	0	0	0	0	0	0	0	0	0	0	0	0	0	0	0	0	0	0	0	0	0	0	0	0	0	0	0
Bacteria/Actinobacteria/Actinobacteria/Propionibacteriales/Propionibacteriaceae/Propionicicella	0	0	0	0	0	0	0	0	0	0	0	0	0	0	0	0	0	0	0	0	0	0	0	0	0	0	0	0	0	0	0	0	0	0	0	0	0	0	0	0	0	0	0	0	0
Bacteria/Actinobacteria/Actinobacteria/Propionibacteriales/Propionibacteriaceae/Propionicimonas	0	0	0	0	0	0	0	0	0	0	0	0	0	0	0	0	0	0	0	0	0	0	0	0	0	0	0	0	0	0	0	0	0	0	0	0	0	0	0	0	0	0	0	0	0
Bacteria/Actinobacteria/Actinobacteria/Propionibacteriales/Propionibacteriaceae/Propioniferax	0	0	0	0	0	0	0	0	0	0	0	0	0	0	0	0	0	0	0	0	0	0	0	0	0	0	0	0	0	0	0	0	0	0	0	0	0	0	0	0	0	0	0	0	0
Bacteria/Actinobacteria/Actinobacteria/Propionibacteriales/Propionibacteriaceae/Pseudopropionibacterium	0	0	0	0	0	0	0	0	0	0	0	0	0	0	0	0	0	0	0	0	0	0	0	0	0	0	0	0	0	0	0	0	0	0	0	0	0	0	0	0	0	0	0	0	0
Bacteria/Actinobacteria/Actinobacteria/Propionibacteriales/Propionibacteriaceae/Tessaracoccus	0	0	0	0	0	0	0	0	0	0	0	0	0	0	0	0	0	0	0	0	0	0	0	0	0	0	0	0	0	0	0	0	0	0	0	0	0	0	0	0	0	0	0	0	0
Bacteria/Actinobacteria/Actinobacteria/Propionibacteriales/Propionibacteriaceae/uncultured	0	0	0	0	0	0	0	0	0	0	0	0	0	0	0	0	0	0	0	0	0	0	0	0	0	0	0	0	0	0	0	0	0	35	0	0	0	0	0	0	0	0	0	0	0
Bacteria/Actinobacteria/Actinobacteria/Pseudonocardiales/Pseudonocardiaceae/Actinopolyspora	0	0	0	0	0	0	0	0	0	0	0	0	0	0	0	0	0	0	0	0	0	0	0	0	0	0	0	0	0	0	0	0	0	0	0	0	0	0	0	0	0	0	0	0	0
Bacteria/Actinobacteria/Actinobacteria/Pseudonocardiales/Pseudonocardiaceae/Amycolatopsis	0	0	0	0	0	0	0	0	0	0	0	0	0	0	0	0	0	0	0	0	0	0	0	0	0	0	0	0	0	0	0	0	0	0	0	0	0	0	0	0	0	0	0	0	0
Bacteria/Actinobacteria/Actinobacteria/Pseudonocardiales/Pseudonocardiaceae/Crossiella	0	0	0	0	0	0	0	0	0	0	0	0	0	0	0	0	0	0	0	0	0	0	0	0	0	0	0	0	0	0	0	0	0	0	0	0	0	0	0	0	0	0	0	0	0
Bacteria/Actinobacteria/Actinobacteria/Pseudonocardiales/Pseudonocardiaceae/Longimycelium	0	0	0	0	0	0	0	0	0	0	0	0	0	0	0	0	0	0	0	0	0	0	0	0	0	0	0	0	0	0	0	0	0	0	0	0	0	0	0	0	0	0	0	0	0
Bacteria/Actinobacteria/Actinobacteria/Pseudonocardiales/Pseudonocardiaceae/Pseudonocardia	0	0	0	0	0	0	0	0	0	0	0	0	0	0	0	0	0	0	0	0	0	0	0	0	0	0	0	0	0	0	0	0	0	0	0	0	0	0	0	0	0	0	0	0	0
Bacteria/Actinobacteria/Actinobacteria/Pseudonocardiales/Pseudonocardiaceae/Saccharomonospora	0	0	0	0	0	0	0	0	0	0	0	0	0	0	0	0	0	0	0	0	0	0	0	0	0	0	0	0	0	0	0	0	0	0	0	0	0	0	0	0	0	0	0	0	0
Bacteria/Actinobacteria/Actinobacteria/Pseudonocardiales/Pseudonocardiaceae/Saccharopolyspora	0	0	0	0	0	0	0	0	0	0	0	0	0	0	0	0	0	0	0	0	0	0	0	0	0	0	0	0	0	0	0	0	0	0	0	0	0	0	0	0	0	0	0	0	0
Bacteria/Actinobacteria/Actinobacteria/Pseudonocardiales/Pseudonocardiaceae/Saccharothrix	0	0	0	0	0	0	0	0	0	0	0	0	0	0	0	0	0	0	0	0	0	0	0	0	0	0	0	0	0	0	0	0	0	0	0	0	0	0	0	0	0	0	0	0	0
Bacteria/Actinobacteria/Actinobacteria/Streptomycetales/Streptomycetaceae/Kitasatospora	0	0	0	0	0	0	0	0	0	0	0	0	0	0	0	0	0	0	0	0	0	0	0	0	0	0	0	0	0	0	0	0	0	0	0	0	0	0	0	0	0	0	0	0	0
Bacteria/Actinobacteria/Actinobacteria/Streptomycetales/Streptomycetaceae/Streptomyces	0	0	0	0	0	0	0	0	0	0	0	0	0	0	0	0	0	0	0	0	0	0	0	0	0	0	0	0	0	0	0	0	0	0	0	0	0	0	0	0	0	0	0	0	0
Bacteria/Actinobacteria/Actinobacteria/Streptosporangiales/Nocardiopsaceae/Nocardiopsis	0	0	0	0	0	0	0	0	0	0	0	0	0	0	0	0	0	0	0	0	0	0	0	0	0	0	0	0	0	0	0	0	0	0	0	0	0	0	0	0	0	0	0	0	0
Bacteria/Actinobacteria/Actinobacteria/Streptosporangiales/Nocardiopsaceae/uncultured	0	0	0	0	0	0	0	0	0	0	0	0	0	0	0	0	0	0	0	0	0	0	0	0	0	0	0	0	0	0	0	0	0	0	0	0	0	0	0	0	0	0	0	0	0
Bacteria/Actinobacteria/Actinobacteria/Streptosporangiales/Streptosporangiaceae/Microbispora	0	0	0	0	0	0	0	0	0	0	0	0	0	0	0	0	0	0	0	0	0	0	0	0	0	0	0	0	0	0	0	0	0	0	0	0	0	0	0	0	0	0	0	0	0
Bacteria/Actinobacteria/Actinobacteria/Streptosporangiales/Streptosporangiaceae/Microtetraspora	0	0	0	0	0	0	0	0	0	0	0	0	0	0	0	0	0	0	0	0	0	0	0	0	0	0	0	0	0	0	0	0	0	0	0	0	0	0	0	0	0	0	0	0	0
Bacteria/Actinobacteria/Actinobacteria/Streptosporangiales/Streptosporangiaceae/Nonomuraea	0	0	0	0	0	0	0	0	0	0	0	0	0	0	0	0	0	0	0	0	0	0	0	0	0	0	0	0	0	0	0	0	0	0	0	0	0	0	0	0	0	0	0	0	0
Bacteria/Actinobacteria/Actinobacteria/Streptosporangiales/Streptosporangiaceae/Sphaerisporangium	0	0	0	0	0	0	0	0	0	0	0	0	0	0	0	0	0	0	0	0	0	0	0	0	0	0	0	0	0	0	0	0	0	0	0	0	0	0	0	0	0	0	0	0	0
Bacteria/Actinobacteria/Actinobacteria/Streptosporangiales/Streptosporangiaceae/Streptosporangium	0	0	0	0	0	0	0	0	0	0	0	0	0	0	0	0	0	0	0	0	0	0	0	0	0	0	0	0	0	0	0	0	0	0	0	0	0	0	0	0	0	0	0	0	0
Bacteria/Actinobacteria/Actinobacteria/Streptosporangiales/Streptosporangiaceae/Thermopolyspora	0	0	0	0	0	0	0	0	0	0	0	0	0	0	0	0	0	0	0	0	0	0	0	0	0	0	0	0	0	0	0	0	0	0	0	0	0	0	0	0	0	0	0	0	0
Bacteria/Actinobacteria/Actinobacteria/Streptosporangiales/Thermomonosporaceae/[Streptomyces] thermoautotrophicus	0	0	0	0	0	0	0	0	0	0	0	0	0	0	0	0	0	0	0	0	0	0	0	0	0	0	0	0	0	0	0	0	0	0	0	0	0	0	0	0	0	0	0	0	0
Bacteria/Actinobacteria/Actinobacteria/Streptosporangiales/Thermomonosporaceae/Actinocorallia	0	0	0	0	0	0	0	0	0	0	0	0	0	0	0	0	0	0	0	0	0	0	0	0	0	0	0	0	0	0	0	0	0	0	0	0	0	0	0	0	0	0	0	0	0
Bacteria/Actinobacteria/Actinobacteria/Streptosporangiales/Thermomonosporaceae/Actinomadura	0	0	0	0	0	0	0	0	0	0	0	0	0	0	0	0	0	0	0	0	0	0	0	0	0	0	0	0	0	0	0	0	0	0	0	0	0	0	0	0	0	0	0	0	0
Bacteria/Actinobacteria/Actinobacteria/Streptosporangiales/Thermomonosporaceae/Thermobispora	0	0	0	0	0	0	0	0	0	0	0	0	0	0	0	0	0	0	0	0	0	0	0	0	0	0	0	0	0	0	0	0	0	0	0	0	0	0	0	0	0	0	0	0	0
Bacteria/Actinobacteria/Coriobacteriia/Coriobacteriales/Atopobiaceae/Atopobium	0	0	0	0	0	0	0	0	0	0	0	0	0	0	0	0	0	0	0	0	0	0	0	0	0	0	0	0	0	0	0	0	0	0	0	0	0	0	0	0	0	0	0	0	0
Bacteria/Actinobacteria/Coriobacteriia/Coriobacteriales/Atopobiaceae/Coriobacteriaceae UCG-003	0	0	0	0	0	0	0	0	0	0	0	0	0	0	0	0	0	0	0	0	0	0	0	0	0	0	0	0	0	0	0	0	0	0	0	0	0	0	0	0	0	0	0	0	0
Bacteria/Actinobacteria/Coriobacteriia/Coriobacteriales/Atopobiaceae/Libanicoccus	0	0	0	0	0	0	0	0	0	0	0	0	0	0	0	0	0	0	0	0	0	0	0	0	0	0	0	0	0	0	0	0	0	0	0	0	0	0	0	0	0	0	0	0	0
Bacteria/Actinobacteria/Coriobacteriia/Coriobacteriales/Atopobiaceae/Olsenella	0	0	0	0	0	0	0	0	0	0	0	0	0	0	0	0	0	0	0	0	0	0	0	0	0	0	0	0	0	0	0	0	0	0	0	0	0	0	0	0	0	0	0	0	0
Bacteria/Actinobacteria/Coriobacteriia/Coriobacteriales/Atopobiaceae/uncultured	0	0	0	0	0	0	0	0	0	0	0	0	0	0	0	0	0	0	0	0	0	0	0	0	0	0	0	0	0	0	0	0	0	0	0	0	0	0	0	0	0	0	0	0	0
Bacteria/Actinobacteria/Coriobacteriia/Coriobacteriales/Coriobacteriaceae/Collinsella	0	0	0	0	0	0	0	0	0	0	0	0	0	0	0	0	0	0	0	0	0	0	0	0	0	0	0	0	0	0	0	0	0	0	0	0	0	0	0	0	0	0	0	0	0
Bacteria/Actinobacteria/Coriobacteriia/Coriobacteriales/Coriobacteriaceae/Coriobacterium	0	0	0	0	0	0	0	0	0	0	0	0	0	0	0	0	0	0	0	0	0	0	0	0	0	0	0	0	0	0	0	0	0	0	0	0	0	0	0	0	0	0	0	0	0
Bacteria/Actinobacteria/Coriobacteriia/Coriobacteriales/Coriobacteriales Incertae Sedis/Phoenicibacter	0	0	0	0	0	0	0	0	0	0	0	0	0	0	0	0	0	0	0	0	0	0	0	0	0	0	0	0	0	0	0	0	0	0	0	0	0	0	0	0	0	0	0	0	0
Bacteria/Actinobacteria/Coriobacteriia/Coriobacteriales/Coriobacteriales Incertae Sedis/Raoultibacter	0	0	0	0	0	0	0	0	0	0	0	0	0	0	0	0	0	0	0	0	0	0	0	0	0	0	0	0	0	0	0	0	0	0	0	0	0	0	0	0	0	0	0	0	0
Bacteria/Actinobacteria/Coriobacteriia/Coriobacteriales/Coriobacteriales Incertae Sedis/uncultured	0	0	0	0	0	0	0	0	0	0	0	0	0	0	0	0	0	0	0	0	0	0	0	0	0	0	0	0	0	0	0	0	0	0	0	0	0	0	0	0	0	0	0	0	0
Bacteria/Actinobacteria/Coriobacteriia/Coriobacteriales/Eggerthellaceae/Denitrobacterium	0	0	0	0	0	0	0	0	0	0	0	0	0	0	0	0	0	0	0	0	0	0	0	0	0	0	0	0	0	0	0	0	0	0	0	0	0	0	0	0	0	0	0	0	0
Bacteria/Actinobacteria/Coriobacteriia/Coriobacteriales/Eggerthellaceae/DNF00809	0	0	0	0	0	0	0	0	0	0	0	0	0	0	0	0	0	0	0	0	0	0	0	0	0	0	0	0	0	0	0	0	0	0	0	0	0	0	0	0	0	0	0	0	0
Bacteria/Actinobacteria/Coriobacteriia/Coriobacteriales/Eggerthellaceae/Eggerthella	0	0	0	0	0	0	0	0	0	0	0	0	0	0	0	0	0	0	0	0	0	0	0	0	0	0	0	0	0	0	0	0	0	0	0	0	0	0	0	0	0	0	0	0	0
Bacteria/Actinobacteria/Coriobacteriia/Coriobacteriales/Eggerthellaceae/Enterorhabdus	0	0	0	0	0	0	0	0	0	0	0	0	0	0	0	0	0	0	0	0	0	0	0	0	0	0	0	0	0	0	0	0	0	0	0	0	0	0	0	0	0	0	0	0	0
Bacteria/Actinobacteria/Coriobacteriia/Coriobacteriales/Eggerthellaceae/Gordonibacter	0	0	0	0	0	0	0	0	0	0	0	0	0	0	0	0	0	0	0	0	0	0	0	0	0	0	0	0	0	0	0	0	0	0	0	0	0	0	0	0	0	0	0	0	0
Bacteria/Actinobacteria/Coriobacteriia/Coriobacteriales/Eggerthellaceae/Senegalimassilia	0	0	0	0	0	0	0	0	0	0	0	0	0	0	0	0	0	0	0	0	0	0	0	0	0	0	0	0	0	0	0	0	0	0	0	0	0	0	0	0	0	0	0	0	0
Bacteria/Actinobacteria/Coriobacteriia/Coriobacteriales/Eggerthellaceae/Slackia	0	0	0	0	0	0	0	0	0	0	0	0	0	0	0	0	0	0	0	0	0	0	0	0	0	0	0	0	0	0	0	0	0	0	0	0	0	0	0	0	0	0	0	0	0
Bacteria/Actinobacteria/Coriobacteriia/Coriobacteriales/Eggerthellaceae/uncultured	0	0	0	0	0	0	0	0	0	0	0	0	0	0	0	0	0	0	0	0	0	0	0	0	0	0	0	0	0	0	0	0	0	0	0	0	0	0	0	0	0	0	0	0	0
Bacteria/Actinobacteria/Nitriliruptoria/Euzebyales/Euzebyaceae/Egibacter	0	0	0	0	0	0	0	0	0	0	0	0	0	0	0	0	0	0	0	0	0	0	0	0	0	0	0	0	0	0	0	0	0	0	0	0	0	0	0	0	0	0	0	0	0
Bacteria/Actinobacteria/Nitriliruptoria/Euzebyales/Euzebyaceae/uncultured	0	0	0	0	0	0	0	0	0	0	0	0	0	0	0	0	0	0	0	0	0	0	0	0	0	0	0	0	0	0	0	0	0	0	0	0	0	0	0	0	0	0	0	0	0
Bacteria/Actinobacteria/Nitriliruptoria/Nitriliruptorales/Nitriliruptoraceae/Nitriliruptor	0	0	0	0	0	0	0	0	0	0	0	0	0	0	0	0	0	0	0	0	0	0	0	0	0	0	0	0	0	0	0	0	0	0	0	0	0	0	0	0	0	0	0	0	0
Bacteria/Actinobacteria/Rubrobacteria/Rubrobacterales/Rubrobacteriaceae/Rubrobacter	0	0	0	0	0	0	0	0	0	0	0	0	0	0	0	0	0	0	0	0	0	0	0	0	0	0	0	0	0	0	0	0	0	0	0	0	0	0	0	0	0	0	0	0	0
Bacteria/Actinobacteria/Thermoleophilia/Gaiellales/Gaiellaceae/Gaiella	0	0	0	0	0	0	0	0	0	0	0	0	0	0	0	0	0	0	0	0	0	0	0	0	0	0	0	0	0	0	0	0	0	0	0	66	0	0	0	0	0	0	0	0	0
Bacteria/Actinobacteria/Thermoleophilia/Solirubrobacterales/Solirubrobacteraceae/Conexibacter	0	0	0	0	0	0	0	0	0	0	0	0	0	0	0	0	0	0	0	0	0	0	0	0	0	0	0	0	0	0	0	0	0	0	0	0	0	0	0	0	0	0	0	0	0
Bacteria/Actinobacteria/Thermoleophilia/Solirubrobacterales/Solirubrobacteraceae/Parviterribacter	0	0	0	0	0	0	0	0	0	0	0	0	0	0	0	0	0	0	0	0	0	0	0	0	0	0	0	0	0	0	0	0	0	0	0	0	0	0	0	0	0	0	0	0	0
Bacteria/Actinobacteria/Thermoleophilia/Solirubrobacterales/Solirubrobacteraceae/Patulibacter	0	0	0	0	0	0	0	0	0	0	0	0	0	0	0	0	0	0	0	0	0	0	0	0	0	0	0	0	0	0	0	0	0	0	0	0	0	0	0	0	0	0	0	0	0
Bacteria/Actinobacteria/Thermoleophilia/Solirubrobacterales/Solirubrobacteraceae/Solirubrobacter	0	0	0	0	0	0	0	0	0	0	0	0	0	0	0	0	0	0	0	0	0	0	0	0	0	0	0	0	0	0	0	0	0	0	0	0	0	0	0	0	0	0	0	0	0
Bacteria/Actinobacteria/Thermoleophilia/Solirubrobacterales/Solirubrobacteraceae/uncultured	0	0	0	0	0	0	0	0	0	0	0	0	0	0	0	0	0	0	0	0	0	0	0	0	0	0	0	0	0	0	0	0	0	0	0	0	0	0	0	0	0	0	0	0	0
Bacteria/Aquificae/Aquificae/Aquificales/Aquificaceae/Hydrogenobacter	0	0	0	0	0	0	0	0	0	0	0	0	0	0	0	0	0	0	0	0	0	0	0	0	0	0	0	0	0	0	0	0	0	0	0	0	0	0	0	0	0	0	0	0	0
Bacteria/Aquificae/Aquificae/Aquificales/Aquificaceae/Thermocrinis	0	0	0	0	0	0	0	0	0	0	0	0	0	0	0	0	0	0	0	0	0	0	0	0	0	0	0	0	0	0	0	0	0	0	0	0	0	0	0	0	0	0	0	0	0
Bacteria/Aquificae/Aquificae/Aquificales/Hydrogenobaculaceae/Hydrogenobaculum	0	0	0	0	0	0	0	0	0	0	0	0	0	0	0	0	0	0	0	0	0	0	0	0	0	0	0	0	0	0	0	0	0	0	0	0	0	0	0	0	0	0	0	0	0
Bacteria/Aquificae/Aquificae/Hydrogenothermales/Hydrogenothermaceae/Sulfurihydrogenibium	0	0	0	0	0	0	0	0	0	0	0	0	0	0	0	0	0	0	0	0	0	0	0	0	0	0	0	0	0	0	0	0	0	0	0	0	0	0	0	0	0	0	0	0	0
Bacteria/Aquificae/Aquificae/Hydrogenothermales/Hydrogenothermaceae/uncultured	0	0	0	0	0	0	0	0	0	0	0	0	0	0	0	0	0	0	0	0	0	0	0	0	0	0	0	0	0	0	0	0	0	0	0	0	0	0	0	0	0	0	0	0	0
Bacteria/Aquificae/Desulfurobacteriia/Desulfurobacteriales/Desulfurobacteriaceae/Desulfurobacterium	0	0	0	0	0	0	0	0	0	0	0	0	0	0	0	0	0	0	0	0	0	0	0	0	0	0	0	0	0	0	0	0	0	0	0	0	0	0	0	0	0	0	0	0	0
Bacteria/Armatimonadetes/Armatimonadia/Armatimonadales/Armatimonadaceae/Armatimonas	0	0	0	0	0	0	0	0	0	0	0	0	0	0	0	0	0	0	0	0	0	0	0	0	0	0	0	0	0	0	0	0	0	0	0	0	0	0	0	0	0	0	0	0	0
Bacteria/Armatimonadetes/Chthonomonadetes/Chthonomonadales/Chthonomonadaceae/Chthonomonas	0	0	0	0	0	0	0	0	0	0	0	0	0	0	0	0	0	0	0	0	0	0	0	0	0	0	0	0	0	0	0	0	0	0	0	0	0	0	0	0	0	0	0	0	0
Bacteria/Armatimonadetes/Fimbriimonadia/Fimbriimonadales/Fimbriimonadaceae/Fimbriimonas	0	0	0	0	0	0	0	0	0	0	0	0	0	0	0	0	0	0	0	0	0	0	0	0	0	0	0	0	0	0	0	0	0	0	0	0	0	0	0	0	0	0	0	0	0
Bacteria/Atribacteria/Caldatribacteriia/Caldatribacteriales/Caldatribacteriaceae/Candidatus Caldatribacterium	0	0	0	0	0	0	0	0	0	0	0	0	0	0	0	0	0	0	0	0	0	0	0	0	0	0	0	0	0	0	0	0	0	0	0	0	0	0	0	0	0	0	0	0	0
Bacteria/Bacteroidetes/Bacteroidia/Bacteroidales/Bacteroidaceae/Bacteroides	104	0	0	0	0	0	119	0	0	0	0	0	0	114	0	108	0	0	0	0	0	0	0	0	0	86	0	0	0	0	0	0	0	0	0	0	0	0	0	0	0	0	0	0	0
Bacteria/Bacteroidetes/Bacteroidia/Bacteroidales/Barnesiellaceae/Barnesiella	0	0	0	0	0	0	0	0	0	0	0	0	0	0	0	0	0	0	0	0	0	0	0	0	0	0	0	0	0	0	0	0	0	0	0	0	0	0	0	0	0	0	0	0	0
Bacteria/Bacteroidetes/Bacteroidia/Bacteroidales/Barnesiellaceae/Coprobacter	0	0	0	0	0	0	0	0	0	0	0	0	0	0	0	0	0	0	0	0	0	0	0	0	0	0	0	0	0	0	0	0	0	0	0	0	0	0	0	0	0	0	0	0	0
Bacteria/Bacteroidetes/Bacteroidia/Bacteroidales/Barnesiellaceae/uncultured	0	0	0	0	0	0	0	0	0	0	0	0	0	0	0	0	0	0	0	0	0	0	0	0	0	0	0	0	0	0	0	0	0	0	0	0	0	0	0	0	0	0	0	0	0
Bacteria/Bacteroidetes/Bacteroidia/Bacteroidales/Dysgonomonadaceae/Candidatus Armantifilum	0	0	0	0	0	0	0	0	0	0	0	0	0	0	0	0	0	0	0	0	0	0	0	0	0	0	0	0	0	0	0	0	0	0	0	0	0	0	0	0	0	0	0	0	0
Bacteria/Bacteroidetes/Bacteroidia/Bacteroidales/Dysgonomonadaceae/Candidatus Azobacteroides	0	0	0	0	0	0	0	0	0	0	0	0	0	0	0	0	0	0	0	0	0	0	0	0	0	0	0	0	0	0	0	0	0	0	0	0	0	0	0	0	0	0	0	0	0
Bacteria/Bacteroidetes/Bacteroidia/Bacteroidales/Dysgonomonadaceae/Candidatus Symbiothrix	0	0	0	0	0	0	0	0	0	0	0	0	0	0	0	0	0	0	0	0	0	0	0	0	0	0	0	0	0	0	0	0	0	0	0	0	0	0	0	0	0	0	0	0	0
Bacteria/Bacteroidetes/Bacteroidia/Bacteroidales/Dysgonomonadaceae/Dysgonomonas	0	0	0	0	0	0	0	0	0	0	0	0	0	0	0	0	0	0	0	0	0	0	0	0	0	0	0	0	0	0	0	0	0	0	0	0	0	0	0	0	0	0	0	0	0
Bacteria/Bacteroidetes/Bacteroidia/Bacteroidales/Dysgonomonadaceae/Fermentimonas	0	0	0	0	0	0	0	0	0	0	0	0	0	0	0	0	0	0	0	0	0	0	0	0	0	0	0	0	0	0	0	0	0	0	0	0	0	0	0	0	0	0	0	0	0
Bacteria/Bacteroidetes/Bacteroidia/Bacteroidales/Dysgonomonadaceae/Petrimonas	0	0	0	0	0	0	0	0	0	0	0	0	0	0	0	0	0	0	0	0	0	0	0	0	0	0	0	0	0	0	0	0	0	0	0	0	0	0	0	0	0	0	0	0	0
Bacteria/Bacteroidetes/Bacteroidia/Bacteroidales/Dysgonomonadaceae/Proteiniphilum	0	0	0	0	0	0	0	0	0	0	0	0	0	0	0	0	0	0	0	0	0	0	0	0	0	0	0	0	0	0	0	0	0	0	0	0	0	0	0	0	0	0	0	0	0
Bacteria/Bacteroidetes/Bacteroidia/Bacteroidales/Dysgonomonadaceae/uncultured	0	0	0	0	0	0	0	0	0	0	0	0	0	0	0	0	0	0	0	0	0	0	0	0	0	0	0	0	0	0	0	0	0	0	0	0	0	0	0	0	0	0	0	0	0
Bacteria/Bacteroidetes/Bacteroidia/Bacteroidales/Marinifilaceae/Butyricimonas	0	0	0	0	0	0	0	0	0	0	0	0	0	0	0	0	0	0	0	0	0	0	0	0	0	0	0	0	0	0	0	0	0	0	0	0	0	0	0	0	0	0	0	0	0
Bacteria/Bacteroidetes/Bacteroidia/Bacteroidales/Marinifilaceae/Marinifilum	44	20	0	0	0	0	0	0	0	0	0	0	215	63	178	0	0	0	0	18	0	65	40	0	0	23	0	0	0	0	0	0	0	0	0	0	0	30	16	0	0	0	0	0	0
Bacteria/Bacteroidetes/Bacteroidia/Bacteroidales/Marinifilaceae/Odoribacter	0	0	0	0	0	0	0	0	0	0	0	0	0	0	0	0	0	0	0	0	0	0	0	0	0	0	0	0	0	0	0	0	0	0	0	0	0	0	0	0	0	0	0	0	0
Bacteria/Bacteroidetes/Bacteroidia/Bacteroidales/Marinifilaceae/Sanguibacteroides	0	0	0	0	0	0	0	0	0	0	0	0	0	0	0	0	0	0	0	0	0	0	0	0	0	0	0	0	0	0	0	0	0	0	0	0	0	0	0	0	0	0	0	0	0
Bacteria/Bacteroidetes/Bacteroidia/Bacteroidales/Marinifilaceae/uncultured	0	0	0	0	0	0	0	0	0	0	0	0	24	0	15	0	0	0	0	0	0	0	0	0	0	0	0	0	0	0	0	0	0	0	0	0	0	0	0	0	0	0	0	0	0
Bacteria/Bacteroidetes/Bacteroidia/Bacteroidales/Marinilabiliaceae/[Cytophaga] xylanolytica group	0	0	0	0	0	0	0	0	0	0	0	0	0	0	0	0	0	0	0	0	0	0	0	0	0	0	0	0	0	0	0	0	0	0	0	0	0	0	0	0	0	0	0	0	0
Bacteria/Bacteroidetes/Bacteroidia/Bacteroidales/Marinilabiliaceae/Alkaliflexus	0	0	0	0	0	0	0	0	0	0	0	0	0	0	0	0	0	0	0	0	0	0	0	0	0	0	0	0	0	0	0	0	0	0	0	0	0	0	0	0	0	0	0	0	0
Bacteria/Bacteroidetes/Bacteroidia/Bacteroidales/Marinilabiliaceae/Anaerophaga	0	0	0	0	0	0	0	0	0	0	0	0	0	0	0	0	0	0	0	0	0	0	0	0	0	0	0	0	0	0	0	0	0	0	0	0	0	0	0	0	0	0	0	0	0
Bacteria/Bacteroidetes/Bacteroidia/Bacteroidales/Marinilabiliaceae/Carboxylicivirga	0	0	0	0	0	0	0	0	0	0	0	0	0	0	0	0	0	0	0	0	0	0	0	0	0	0	0	0	0	0	0	0	0	0	0	0	0	0	0	0	0	0	0	0	0
Bacteria/Bacteroidetes/Bacteroidia/Bacteroidales/Marinilabiliaceae/Labilibacter	0	0	0	0	0	0	0	0	0	0	0	0	25	0	0	0	0	0	0	0	0	0	0	0	0	0	0	0	0	0	0	0	0	0	0	0	0	0	0	0	0	0	0	0	0
Bacteria/Bacteroidetes/Bacteroidia/Bacteroidales/Marinilabiliaceae/Mangroviflexus	0	0	0	0	0	0	0	0	0	0	0	0	0	0	0	0	0	0	0	0	0	0	0	0	0	0	0	0	0	0	0	0	0	0	0	0	0	0	0	0	0	0	0	0	0
Bacteria/Bacteroidetes/Bacteroidia/Bacteroidales/Marinilabiliaceae/Marinilabilia	0	0	0	0	0	0	0	0	0	0	0	0	0	0	0	0	0	0	0	0	0	0	0	0	0	0	0	0	0	0	0	0	0	0	0	0	0	0	0	0	0	0	0	0	0
Bacteria/Bacteroidetes/Bacteroidia/Bacteroidales/Marinilabiliaceae/Ruminofilibacter	0	0	0	0	0	0	0	0	0	0	0	0	0	0	0	0	0	0	0	0	0	0	0	0	0	0	0	0	0	0	0	0	0	0	0	0	0	0	0	0	0	0	0	0	0
Bacteria/Bacteroidetes/Bacteroidia/Bacteroidales/Marinilabiliaceae/Saccharicrinis	0	0	0	0	0	0	0	0	0	0	0	0	0	0	0	0	0	0	0	0	0	0	0	0	0	0	0	0	0	0	0	0	0	0	0	0	0	0	0	0	0	0	0	0	0
Bacteria/Bacteroidetes/Bacteroidia/Bacteroidales/Marinilabiliaceae/uncultured	393	281	259	237	235	256	285	215	220	217	260	301	407	286	341	207	144	0	318	279	432	126	228	276	189	222	238	216	125	217	160	0	107	134	120	139	240	289	270	124	139	140	194	185	196
Bacteria/Bacteroidetes/Bacteroidia/Bacteroidales/Muribaculaceae/Muribaculum	0	0	0	0	0	0	0	0	0	0	0	0	0	0	0	0	0	0	0	0	0	0	0	0	0	0	0	0	0	0	0	0	0	0	0	0	0	0	0	0	0	0	0	0	0
Bacteria/Bacteroidetes/Bacteroidia/Bacteroidales/Paludibacteraceae/F0058	0	0	0	0	0	0	0	0	0	0	0	0	0	0	0	0	0	0	0	0	0	0	0	0	0	0	0	0	0	0	0	0	0	0	0	0	0	0	0	0	0	0	0	0	0
Bacteria/Bacteroidetes/Bacteroidia/Bacteroidales/Paludibacteraceae/H1	0	0	0	0	0	0	0	0	0	0	0	0	0	0	0	0	0	0	0	0	0	0	0	0	0	0	0	0	0	0	0	0	0	0	0	0	0	0	0	0	0	0	0	0	0
Bacteria/Bacteroidetes/Bacteroidia/Bacteroidales/Paludibacteraceae/Microbacter	0	0	0	0	0	0	0	0	0	0	0	0	0	0	0	0	0	0	0	0	0	0	0	0	0	0	0	0	0	0	0	0	0	0	0	0	0	0	0	0	0	0	0	0	0
Bacteria/Bacteroidetes/Bacteroidia/Bacteroidales/Paludibacteraceae/Paludibacter	88	0	0	0	0	0	0	0	0	0	0	0	0	0	0	0	0	0	0	0	0	0	0	0	0	0	0	0	0	0	0	0	0	0	0	0	0	0	0	0	0	0	0	0	0
Bacteria/Bacteroidetes/Bacteroidia/Bacteroidales/Paludibacteraceae/uncultured	0	0	0	0	0	0	0	0	0	0	0	0	0	0	0	0	0	0	0	0	0	0	0	0	0	0	0	0	0	0	0	0	0	0	0	0	0	0	0	0	0	0	0	0	0
Bacteria/Bacteroidetes/Bacteroidia/Bacteroidales/Porphyromonadaceae/Porphyromonas	0	0	0	0	0	0	0	0	0	0	0	0	0	0	0	0	0	0	0	0	0	0	0	0	0	0	0	0	0	0	0	0	0	0	0	0	0	0	0	0	0	0	0	0	0
Bacteria/Bacteroidetes/Bacteroidia/Bacteroidales/Prevotellaceae/Alloprevotella	0	0	0	0	0	0	0	0	0	0	0	0	0	0	0	0	0	0	0	0	0	0	0	0	0	0	0	0	0	0	0	0	0	0	0	0	0	0	0	0	0	0	0	0	0
Bacteria/Bacteroidetes/Bacteroidia/Bacteroidales/Prevotellaceae/Paraprevotella	0	0	0	0	0	0	0	0	0	0	0	0	0	0	0	0	0	0	0	0	0	0	0	0	0	0	0	0	0	0	0	0	0	0	0	0	0	0	0	0	0	0	0	0	0
Bacteria/Bacteroidetes/Bacteroidia/Bacteroidales/Prevotellaceae/Prevotella 1	0	0	0	0	0	0	0	0	0	0	0	0	0	0	0	0	0	0	0	0	0	0	0	0	0	0	0	0	0	0	0	0	0	0	0	0	0	0	0	0	0	0	0	0	0
Bacteria/Bacteroidetes/Bacteroidia/Bacteroidales/Prevotellaceae/Prevotella 2	0	0	0	0	0	0	0	0	0	0	0	0	0	0	0	0	0	0	0	0	0	0	0	0	0	0	0	0	0	0	0	0	0	0	0	0	0	0	0	0	0	0	0	0	0
Bacteria/Bacteroidetes/Bacteroidia/Bacteroidales/Prevotellaceae/Prevotella 6	0	0	0	0	0	0	0	0	0	0	0	0	0	0	0	0	0	0	0	0	0	0	0	0	0	0	0	0	0	0	0	0	0	0	0	0	0	0	0	0	0	0	0	0	0
Bacteria/Bacteroidetes/Bacteroidia/Bacteroidales/Prevotellaceae/Prevotella 7	0	0	0	0	0	0	0	0	0	0	0	0	0	0	0	0	0	0	0	0	0	0	0	0	0	0	0	0	0	0	0	0	0	0	0	0	0	0	0	0	0	0	0	0	0
Bacteria/Bacteroidetes/Bacteroidia/Bacteroidales/Prevotellaceae/Prevotella 9	0	0	0	0	0	0	0	0	0	0	0	0	0	0	0	0	0	0	0	0	0	0	0	0	0	0	0	0	0	0	0	0	0	0	0	0	0	0	0	0	0	0	0	0	0
Bacteria/Bacteroidetes/Bacteroidia/Bacteroidales/Prevotellaceae/Prevotella	0	0	0	0	0	0	0	0	0	0	0	0	0	0	0	0	0	0	0	0	0	0	0	0	0	0	0	0	0	0	0	0	0	0	0	0	0	0	0	0	0	0	0	0	0
Bacteria/Bacteroidetes/Bacteroidia/Bacteroidales/Prevotellaceae/Prevotellaceae NK3B31 group	0	0	0	0	0	0	0	0	0	0	0	0	0	0	0	0	0	0	0	0	0	0	0	0	0	0	0	0	0	0	0	0	0	0	0	0	0	0	0	0	0	0	0	0	0
Bacteria/Bacteroidetes/Bacteroidia/Bacteroidales/Prevotellaceae/Prevotellaceae UCG-001	0	0	0	0	0	0	0	0	0	0	0	0	0	0	0	0	0	0	0	0	0	0	0	0	0	0	0	0	0	0	0	0	0	0	0	0	0	0	0	0	0	0	0	0	0
Bacteria/Bacteroidetes/Bacteroidia/Bacteroidales/Prevotellaceae/Prevotellaceae UCG-003	0	0	0	0	0	0	0	0	0	0	0	0	0	0	0	0	0	0	0	0	0	0	0	0	0	0	0	0	0	0	0	0	0	0	0	0	0	0	0	0	0	0	0	0	0
Bacteria/Bacteroidetes/Bacteroidia/Bacteroidales/Prevotellaceae/Prevotellaceae UCG-004	0	0	0	0	0	0	0	0	0	0	0	0	0	0	0	0	0	0	0	0	0	0	0	0	0	0	0	0	0	0	0	0	0	0	0	0	0	0	0	0	0	0	0	0	0
Bacteria/Bacteroidetes/Bacteroidia/Bacteroidales/Prevotellaceae/uncultured	0	0	0	0	0	0	0	0	0	0	0	0	0	0	0	0	0	0	0	0	0	0	0	0	0	0	0	0	0	0	0	0	0	0	0	0	0	0	0	0	0	0	0	0	0
Bacteria/Bacteroidetes/Bacteroidia/Bacteroidales/Prolixibacteraceae/BSV13	0	0	0	0	0	0	0	0	0	0	0	0	0	0	0	0	0	0	0	0	0	0	0	0	0	0	0	0	0	0	0	0	0	0	0	0	0	0	0	0	0	0	0	0	0
Bacteria/Bacteroidetes/Bacteroidia/Bacteroidales/Prolixibacteraceae/Draconibacterium	93	72	67	52	56	61	70	42	50	0	0	0	106	111	113	66	0	0	0	0	45	45	52	70	61	119	95	60	0	29	0	0	0	0	0	0	54	75	74	0	0	0	35	0	0
Bacteria/Bacteroidetes/Bacteroidia/Bacteroidales/Prolixibacteraceae/Mangrovibacterium	0	0	0	0	0	0	0	0	0	0	0	0	0	0	0	0	0	0	0	0	0	0	0	0	0	0	0	0	0	0	0	0	0	0	0	0	0	0	0	0	0	0	0	0	0
Bacteria/Bacteroidetes/Bacteroidia/Bacteroidales/Prolixibacteraceae/Mariniphaga	0	0	0	0	0	0	0	0	0	0	0	0	0	0	0	0	0	0	0	0	0	0	0	0	0	0	0	0	0	0	0	0	0	0	0	0	0	0	0	0	0	0	0	0	0
Bacteria/Bacteroidetes/Bacteroidia/Bacteroidales/Prolixibacteraceae/Meniscus	0	0	0	0	0	0	0	0	0	0	0	0	0	0	0	0	0	0	0	0	0	0	0	0	0	0	0	0	0	0	0	0	0	0	0	0	0	0	0	0	0	0	0	0	0
Bacteria/Bacteroidetes/Bacteroidia/Bacteroidales/Prolixibacteraceae/Prolixibacter	0	0	0	0	0	0	0	0	0	0	0	0	0	0	0	0	0	0	0	0	0	0	0	0	0	0	0	0	0	0	0	0	0	0	0	0	0	0	0	0	0	0	0	0	0
Bacteria/Bacteroidetes/Bacteroidia/Bacteroidales/Prolixibacteraceae/Roseimarinus	53	0	0	0	0	0	0	0	0	0	0	0	0	0	22	0	0	0	0	0	0	0	39	0	41	26	30	0	0	0	0	0	0	0	0	0	0	0	0	0	0	0	0	0	0
Bacteria/Bacteroidetes/Bacteroidia/Bacteroidales/Prolixibacteraceae/Sunxiuqinia	0	0	0	0	0	0	0	0	0	0	0	0	0	0	0	0	0	0	0	0	0	0	0	0	0	0	0	0	0	0	0	0	0	0	0	0	0	0	0	0	0	0	0	0	0
Bacteria/Bacteroidetes/Bacteroidia/Bacteroidales/Prolixibacteraceae/Tangfeifania	0	0	0	0	0	0	0	0	0	0	0	0	0	0	0	0	0	0	0	0	0	0	0	0	0	0	0	0	0	0	0	0	0	0	0	0	0	0	0	0	0	0	0	0	0
Bacteria/Bacteroidetes/Bacteroidia/Bacteroidales/Prolixibacteraceae/uncultured	281	153	147	166	134	161	127	115	117	53	98	91	185	186	256	106	108	0	90	96	141	126	167	170	181	176	200	125	115	155	64	79	56	121	105	65	120	146	141	0	65	83	71	115	65
Bacteria/Bacteroidetes/Bacteroidia/Bacteroidales/Prolixibacteraceae/WCHB1-32	0	0	0	0	0	0	0	0	0	0	0	0	39	0	0	0	0	0	0	0	0	0	0	0	0	0	0	0	0	0	0	0	0	0	0	0	0	0	0	0	0	0	0	0	0
Bacteria/Bacteroidetes/Bacteroidia/Bacteroidales/Rikenellaceae/A7P-90m	0	0	0	0	0	0	0	0	0	0	0	0	0	0	0	0	0	0	0	0	0	0	0	0	0	0	0	0	0	0	0	0	0	0	0	0	0	0	0	0	0	0	0	0	0
Bacteria/Bacteroidetes/Bacteroidia/Bacteroidales/Rikenellaceae/Acetobacteroides	0	0	0	0	0	0	0	0	0	0	0	0	0	0	0	0	0	0	0	0	0	0	0	0	0	0	0	0	0	0	0	0	0	0	0	0	0	0	0	0	0	0	0	0	0
Bacteria/Bacteroidetes/Bacteroidia/Bacteroidales/Rikenellaceae/Alistipes	0	0	0	0	0	0	0	0	0	0	0	0	0	0	0	0	0	0	0	0	0	0	0	0	0	0	0	0	0	0	0	0	0	0	0	0	0	0	0	0	0	0	0	0	0
Bacteria/Bacteroidetes/Bacteroidia/Bacteroidales/Rikenellaceae/Anaerocella	0	0	0	0	0	0	0	0	0	0	0	0	0	0	0	0	0	0	0	0	0	0	0	0	0	0	0	0	0	0	0	0	0	0	0	0	0	0	0	0	0	0	0	0	0
Bacteria/Bacteroidetes/Bacteroidia/Bacteroidales/Rikenellaceae/Bact-08	0	0	0	0	0	0	0	0	0	0	0	0	0	0	34	0	0	0	0	0	0	0	0	0	0	0	0	0	0	0	0	0	0	0	0	0	0	0	0	0	0	0	0	0	0
Bacteria/Bacteroidetes/Bacteroidia/Bacteroidales/Rikenellaceae/BCf9-17 termite group	0	0	0	0	0	0	0	0	0	0	0	0	0	0	0	0	0	0	0	0	0	0	0	0	0	0	0	0	0	0	0	0	0	0	0	0	0	0	0	0	0	0	0	0	0
Bacteria/Bacteroidetes/Bacteroidia/Bacteroidales/Rikenellaceae/Blvii28 wastewater-sludge group	0	0	0	0	0	0	0	0	0	0	0	0	0	0	0	0	0	0	0	0	0	0	0	0	0	0	0	0	0	0	0	0	0	0	0	0	0	0	0	0	0	0	0	0	0
Bacteria/Bacteroidetes/Bacteroidia/Bacteroidales/Rikenellaceae/dgA-11 gut group	0	0	0	0	0	0	0	0	0	0	0	0	0	0	0	0	0	0	0	0	0	0	0	0	0	0	0	0	0	0	0	0	0	0	0	0	0	0	0	0	0	0	0	0	0
Bacteria/Bacteroidetes/Bacteroidia/Bacteroidales/Rikenellaceae/DMER64	0	0	0	0	0	0	0	0	0	0	0	0	0	0	0	0	0	0	0	0	0	0	0	0	0	0	0	0	0	0	0	0	0	0	0	0	0	0	0	0	0	0	0	0	0
Bacteria/Bacteroidetes/Bacteroidia/Bacteroidales/Rikenellaceae/hoa5-07d05 gut group	0	0	0	0	0	0	0	0	0	0	0	0	0	0	0	0	0	0	0	0	0	0	0	0	0	0	0	0	0	0	0	0	0	0	0	0	0	0	0	0	0	0	0	0	0
Bacteria/Bacteroidetes/Bacteroidia/Bacteroidales/Rikenellaceae/M2PB4-61 termite group	0	0	0	0	0	0	0	0	0	0	0	0	0	0	0	0	0	0	0	0	0	0	0	0	0	0	0	0	0	0	0	0	0	0	0	0	0	0	0	0	0	0	0	0	0
Bacteria/Bacteroidetes/Bacteroidia/Bacteroidales/Rikenellaceae/Mucinivorans	0	0	0	0	0	0	0	0	0	0	0	0	0	0	0	0	0	0	0	0	0	0	0	0	0	0	0	0	0	0	0	0	0	0	0	0	0	0	0	0	0	0	0	0	0
Bacteria/Bacteroidetes/Bacteroidia/Bacteroidales/Rikenellaceae/Rikenella	0	0	0	0	0	0	0	0	0	0	0	0	0	0	0	0	0	0	0	0	0	0	0	0	0	0	0	0	0	0	0	0	0	0	0	0	0	0	0	0	0	0	0	0	0
Bacteria/Bacteroidetes/Bacteroidia/Bacteroidales/Rikenellaceae/Rikenellaceae RC9 gut group	0	0	0	0	0	0	0	0	0	0	0	0	0	0	0	0	0	0	0	0	0	0	0	0	0	0	0	0	0	0	0	0	0	0	0	0	0	0	0	0	0	0	0	0	0
Bacteria/Bacteroidetes/Bacteroidia/Bacteroidales/Rikenellaceae/Rs-D38 termite group	0	0	0	0	0	0	0	0	0	0	0	0	0	0	0	0	0	0	0	0	0	0	0	0	0	0	0	0	0	0	0	0	0	0	0	0	0	0	0	0	0	0	0	0	0
Bacteria/Bacteroidetes/Bacteroidia/Bacteroidales/Rikenellaceae/SP3-e08	0	0	0	0	0	0	0	0	0	0	0	0	0	0	0	0	0	0	0	0	0	0	0	0	0	0	0	0	0	0	0	0	0	0	0	0	0	0	0	0	0	0	0	0	0
Bacteria/Bacteroidetes/Bacteroidia/Bacteroidales/Rikenellaceae/U29-B03	0	0	0	0	0	0	0	0	0	0	0	0	0	0	0	0	0	0	0	0	0	0	0	0	0	0	0	0	0	0	0	0	0	0	0	0	0	0	0	0	0	0	0	0	0
Bacteria/Bacteroidetes/Bacteroidia/Bacteroidales/Rikenellaceae/uncultured	0	0	0	0	0	0	0	0	0	0	0	0	0	0	0	0	0	0	0	0	0	0	0	0	0	0	0	0	0	0	0	0	0	0	0	0	0	0	0	0	0	0	0	0	0
Bacteria/Bacteroidetes/Bacteroidia/Bacteroidales/Rs-E47 termite group/GWE2-42-42	0	0	0	0	0	0	0	0	0	0	0	0	0	0	0	0	0	0	0	0	0	0	0	0	0	0	0	0	0	0	0	0	0	0	0	0	0	0	0	0	0	0	0	0	0
Bacteria/Bacteroidetes/Bacteroidia/Bacteroidales/Salinivirgaceae/Salinivirga	0	0	0	0	0	0	0	0	0	0	0	0	0	0	0	0	0	0	0	0	0	0	0	0	0	0	0	0	0	0	0	0	0	0	0	0	0	0	0	0	0	0	0	0	0
Bacteria/Bacteroidetes/Bacteroidia/Bacteroidales/Salinivirgaceae/uncultured	0	0	0	0	0	0	0	0	0	0	0	0	0	0	0	0	0	0	0	0	0	0	0	0	0	0	0	0	0	0	0	0	0	0	0	0	0	0	0	0	0	0	0	0	0
Bacteria/Bacteroidetes/Bacteroidia/Bacteroidales/Tannerellaceae/Candidatus Vestibaculum	0	0	0	0	0	0	0	0	0	0	0	0	0	0	0	0	0	0	0	0	0	0	0	0	0	0	0	0	0	0	0	0	0	0	0	0	0	0	0	0	0	0	0	0	0
Bacteria/Bacteroidetes/Bacteroidia/Bacteroidales/Tannerellaceae/Macellibacteroides	0	0	0	0	0	0	0	0	0	0	0	0	0	0	0	0	0	0	0	0	0	0	0	0	0	0	0	0	0	0	0	0	0	0	0	0	0	0	0	0	0	0	0	0	0
Bacteria/Bacteroidetes/Bacteroidia/Bacteroidales/Tannerellaceae/Parabacteroides	0	0	0	0	0	0	0	0	0	0	0	0	0	0	0	0	0	0	0	0	0	0	0	0	0	0	0	0	0	0	0	0	0	0	0	0	0	0	0	0	0	0	0	0	0
Bacteria/Bacteroidetes/Bacteroidia/Bacteroidales/Tannerellaceae/Tannerella	0	0	0	0	0	0	0	0	0	0	0	0	0	0	0	0	0	0	0	0	0	0	0	0	0	0	0	0	0	0	0	0	0	0	0	0	0	0	0	0	0	0	0	0	0
Bacteria/Bacteroidetes/Bacteroidia/Chitinophagales/Chitinophagaceae/Arachidicoccus	0	0	0	0	0	0	0	0	0	0	0	0	0	0	0	0	0	0	0	0	0	0	0	0	0	0	0	0	0	0	0	0	0	0	0	0	0	0	0	0	0	0	0	0	0
Bacteria/Bacteroidetes/Bacteroidia/Chitinophagales/Chitinophagaceae/Chitinophaga	0	0	0	0	0	0	0	0	0	0	0	0	0	0	0	0	0	0	0	0	0	0	0	0	0	0	0	0	0	0	0	0	0	0	0	0	0	0	0	0	0	0	0	0	0
Bacteria/Bacteroidetes/Bacteroidia/Chitinophagales/Chitinophagaceae/Cnuella	0	0	0	0	0	0	0	0	0	0	0	0	0	0	0	0	0	0	0	0	0	0	0	0	0	0	0	0	0	0	0	0	0	0	0	0	0	0	0	0	0	0	0	0	0
Bacteria/Bacteroidetes/Bacteroidia/Chitinophagales/Chitinophagaceae/Dinghuibacter	0	0	0	0	0	0	0	0	0	0	0	0	0	0	0	0	0	0	0	0	0	0	0	0	0	0	0	0	0	0	0	0	0	0	0	0	0	0	0	0	0	0	0	0	0
Bacteria/Bacteroidetes/Bacteroidia/Chitinophagales/Chitinophagaceae/Ferruginibacter	0	0	0	0	0	0	0	0	0	0	0	0	0	0	0	0	0	0	0	0	0	0	0	0	0	0	0	0	0	0	0	0	0	0	0	0	0	0	0	0	0	0	0	0	0
Bacteria/Bacteroidetes/Bacteroidia/Chitinophagales/Chitinophagaceae/Filimonas	0	0	0	0	0	0	0	0	0	0	0	0	0	0	0	0	0	0	0	0	0	0	0	0	0	0	0	0	0	0	0	0	0	0	0	0	0	0	0	0	0	0	0	0	0
Bacteria/Bacteroidetes/Bacteroidia/Chitinophagales/Chitinophagaceae/Filobacterium	0	0	0	0	0	0	0	0	0	0	0	0	0	0	0	0	0	0	0	0	0	0	0	0	0	0	0	0	0	0	0	0	0	0	0	0	0	0	0	0	0	0	0	0	0
Bacteria/Bacteroidetes/Bacteroidia/Chitinophagales/Chitinophagaceae/Flaviaesturariibacter	0	0	0	0	0	0	0	0	0	0	0	0	0	0	0	0	0	0	0	0	0	0	0	0	0	0	0	0	0	0	0	0	0	0	0	0	0	0	0	0	0	0	0	0	0
Bacteria/Bacteroidetes/Bacteroidia/Chitinophagales/Chitinophagaceae/Flavihumibacter	0	0	0	0	0	0	0	0	0	0	0	0	0	0	0	0	0	0	0	0	0	0	0	0	0	0	0	0	0	0	0	0	0	0	0	0	0	0	0	0	0	0	0	0	0
Bacteria/Bacteroidetes/Bacteroidia/Chitinophagales/Chitinophagaceae/Flavisolibacter	0	0	0	0	0	0	0	0	0	0	0	0	0	0	0	0	0	0	0	0	0	0	0	0	0	0	0	0	0	0	0	0	0	0	0	0	0	0	0	0	0	0	0	0	0
Bacteria/Bacteroidetes/Bacteroidia/Chitinophagales/Chitinophagaceae/Flavitalea	0	0	0	0	0	0	0	0	0	0	0	0	0	0	0	0	0	0	0	0	0	0	0	0	0	0	0	0	0	0	0	0	0	0	0	0	0	0	0	0	0	0	0	0	0
Bacteria/Bacteroidetes/Bacteroidia/Chitinophagales/Chitinophagaceae/Heliimonas	0	0	0	0	0	0	0	0	0	0	0	0	0	0	0	0	0	0	0	0	0	0	0	0	0	0	0	0	0	0	0	0	0	0	0	0	0	0	0	0	0	0	0	0	0
Bacteria/Bacteroidetes/Bacteroidia/Chitinophagales/Chitinophagaceae/Hydrotalea	0	0	0	0	0	0	0	0	0	0	0	0	0	0	0	0	0	0	0	0	0	0	0	0	0	0	0	0	0	0	0	0	0	0	0	0	0	0	0	0	0	0	0	0	0
Bacteria/Bacteroidetes/Bacteroidia/Chitinophagales/Chitinophagaceae/Lacibacter	0	0	0	0	0	0	0	0	0	0	0	0	0	0	0	0	0	0	0	0	0	0	0	0	0	0	0	0	0	0	0	0	0	0	0	0	0	0	0	0	0	0	0	0	0
Bacteria/Bacteroidetes/Bacteroidia/Chitinophagales/Chitinophagaceae/Niabella	0	0	0	0	0	0	0	0	0	0	0	0	0	0	0	0	0	0	0	0	0	0	0	0	0	0	0	0	0	0	0	0	0	0	0	0	0	0	0	0	0	0	0	0	0
Bacteria/Bacteroidetes/Bacteroidia/Chitinophagales/Chitinophagaceae/Niastella	0	0	0	0	0	0	0	0	0	0	0	0	0	0	0	0	0	0	0	0	0	0	0	0	0	0	0	0	0	0	0	0	0	0	0	0	0	0	0	0	0	0	0	0	0
Bacteria/Bacteroidetes/Bacteroidia/Chitinophagales/Chitinophagaceae/Parafilimonas	0	0	0	0	0	0	0	0	0	0	0	0	0	0	0	0	0	0	0	0	0	0	0	0	0	0	0	0	0	0	0	0	0	0	0	0	0	0	0	0	0	0	0	0	0
Bacteria/Bacteroidetes/Bacteroidia/Chitinophagales/Chitinophagaceae/Pseudoflavitalea	0	0	0	0	0	0	0	0	0	0	0	0	0	0	0	0	0	0	0	0	0	0	0	0	0	0	0	0	0	0	0	0	0	0	0	0	0	0	0	0	0	0	0	0	0
Bacteria/Bacteroidetes/Bacteroidia/Chitinophagales/Chitinophagaceae/Sediminibacterium	0	0	0	0	0	0	0	0	0	0	0	0	0	0	0	0	0	0	0	0	0	0	0	0	0	0	0	0	0	0	0	0	0	0	0	0	0	0	0	0	0	0	0	0	0
Bacteria/Bacteroidetes/Bacteroidia/Chitinophagales/Chitinophagaceae/Segetibacter	0	0	0	0	0	0	0	0	0	0	0	0	0	0	0	0	0	0	0	0	0	0	0	0	0	0	0	0	0	0	0	0	0	0	0	0	0	0	0	0	0	0	0	0	0
Bacteria/Bacteroidetes/Bacteroidia/Chitinophagales/Chitinophagaceae/Taibaiella	0	0	0	0	0	0	0	0	0	0	0	0	0	0	0	0	0	0	0	0	0	0	0	0	0	0	0	0	0	0	0	0	0	0	0	0	0	0	0	0	0	0	0	0	0
Bacteria/Bacteroidetes/Bacteroidia/Chitinophagales/Chitinophagaceae/Terrimonas	0	0	0	0	0	0	0	0	0	0	0	0	0	0	0	0	0	0	0	0	0	0	0	0	0	0	0	0	0	0	0	0	0	0	0	0	0	0	0	0	0	0	0	0	0
Bacteria/Bacteroidetes/Bacteroidia/Chitinophagales/Chitinophagaceae/uncultured	0	0	0	0	0	0	0	0	0	0	0	0	0	0	0	0	0	0	0	0	0	0	0	0	0	0	0	0	0	0	0	0	0	0	0	0	0	0	0	0	0	0	0	0	0
Bacteria/Bacteroidetes/Bacteroidia/Chitinophagales/Chitinophagaceae/UTBCD1	0	0	0	0	0	0	0	0	0	0	0	0	0	0	0	0	0	0	0	0	0	0	0	0	0	0	0	0	0	0	0	0	0	0	0	0	0	0	0	0	0	0	0	0	0
Bacteria/Bacteroidetes/Bacteroidia/Chitinophagales/Saprospiraceae/Aureispira	0	0	0	0	0	0	0	0	0	0	0	0	0	0	0	0	0	0	0	0	0	0	0	0	0	0	0	0	0	0	0	0	0	0	0	0	0	0	0	0	0	0	0	0	0
Bacteria/Bacteroidetes/Bacteroidia/Chitinophagales/Saprospiraceae/Candidatus Aquirestis	0	0	0	0	0	0	0	0	0	0	0	0	0	0	0	0	0	0	0	0	0	0	0	0	0	0	0	0	0	0	0	0	0	0	0	0	0	0	0	0	0	0	0	0	0
Bacteria/Bacteroidetes/Bacteroidia/Chitinophagales/Saprospiraceae/Haliscomenobacter	0	0	0	0	0	0	0	0	0	0	0	0	0	0	0	0	0	0	0	0	0	0	0	0	0	0	0	0	0	0	0	0	0	0	0	0	0	0	0	0	0	0	0	0	0
Bacteria/Bacteroidetes/Bacteroidia/Chitinophagales/Saprospiraceae/Lewinella	36	0	23	0	0	0	0	0	0	0	0	0	0	0	19	0	0	0	0	17	0	0	0	0	0	0	0	0	0	0	0	0	0	0	0	0	0	0	0	0	0	0	0	0	0
Bacteria/Bacteroidetes/Bacteroidia/Chitinophagales/Saprospiraceae/Membranicola	0	0	0	0	0	0	0	0	0	0	0	0	0	0	0	0	0	0	0	0	0	0	0	0	0	0	0	0	0	0	0	0	0	0	0	0	0	0	0	0	0	0	0	0	0
Bacteria/Bacteroidetes/Bacteroidia/Chitinophagales/Saprospiraceae/OLB8	0	0	0	0	0	0	0	0	0	0	0	0	0	0	0	0	0	0	0	0	0	0	0	0	0	0	0	0	0	0	0	0	0	0	0	0	0	0	0	0	0	0	0	0	0
Bacteria/Bacteroidetes/Bacteroidia/Chitinophagales/Saprospiraceae/Phaeodactylibacter	0	0	0	0	0	0	0	0	0	0	0	0	0	0	0	0	0	0	0	0	0	0	0	0	0	0	0	0	0	0	0	0	0	0	19	0	0	0	0	0	0	0	0	0	0
Bacteria/Bacteroidetes/Bacteroidia/Chitinophagales/Saprospiraceae/Portibacter	22	0	15	0	0	0	13	0	13	0	0	0	15	12	30	0	0	0	0	13	0	14	19	18	0	15	0	30	0	18	14	16	0	0	0	0	14	0	0	27	16	19	0	0	18
Bacteria/Bacteroidetes/Bacteroidia/Chitinophagales/Saprospiraceae/Rubidimonas	0	0	0	0	0	0	0	0	0	0	0	0	0	0	0	0	0	0	0	0	0	0	0	0	0	0	0	0	0	0	0	0	0	0	0	0	0	0	0	0	0	0	0	0	0
Bacteria/Bacteroidetes/Bacteroidia/Chitinophagales/Saprospiraceae/Saprospira	0	0	0	0	0	0	0	0	0	0	0	0	0	0	0	0	0	0	0	0	0	0	0	0	0	0	0	0	0	0	0	0	0	0	0	0	0	0	0	0	0	0	0	0	0
Bacteria/Bacteroidetes/Bacteroidia/Chitinophagales/Saprospiraceae/uncultured	371	192	176	197	153	139	321	235	246	142	116	107	233	209	262	230	231	164	157	224	170	210	216	223	261	286	228	254	147	210	146	160	139	171	166	180	212	247	229	188	166	191	199	191	234
Bacteria/Bacteroidetes/Bacteroidia/Cytophagales/Amoebophilaceae/Candidatus Amoebophilus	0	0	0	0	0	0	0	0	0	0	0	0	0	0	0	0	0	0	0	0	0	0	0	0	0	0	0	0	0	0	0	0	0	0	0	0	0	0	0	0	0	0	0	0	0
Bacteria/Bacteroidetes/Bacteroidia/Cytophagales/Amoebophilaceae/Candidatus Cardinium	0	0	0	0	0	0	0	0	0	0	0	0	0	0	0	0	0	0	0	0	0	0	0	0	0	0	0	0	0	0	0	0	0	0	0	0	0	0	0	0	0	0	0	0	0
Bacteria/Bacteroidetes/Bacteroidia/Cytophagales/Amoebophilaceae/Candidatus Paenicardinium	0	0	0	0	0	0	0	0	0	0	0	0	0	0	0	0	0	0	0	0	0	0	0	0	0	0	0	0	0	0	0	0	0	0	0	0	0	0	0	0	0	0	0	0	0
Bacteria/Bacteroidetes/Bacteroidia/Cytophagales/Amoebophilaceae/uncultured	0	0	0	0	0	0	0	0	0	0	0	0	0	0	0	0	0	0	0	0	0	0	0	0	0	0	0	0	0	0	0	0	0	0	0	0	0	0	0	0	0	0	0	0	0
Bacteria/Bacteroidetes/Bacteroidia/Cytophagales/Bernardetiaceae/Bernardetia	0	0	0	0	0	0	0	0	0	0	0	0	0	0	0	0	0	0	0	0	0	0	0	0	0	0	0	0	0	0	0	0	0	0	0	0	0	0	0	0	0	0	0	0	0
Bacteria/Bacteroidetes/Bacteroidia/Cytophagales/Bernardetiaceae/Hugenholtzia	0	0	0	0	0	0	0	0	0	0	0	0	0	0	0	0	0	0	0	0	0	0	0	0	0	0	0	0	0	0	0	0	0	0	0	0	0	0	0	0	0	0	0	0	0
Bacteria/Bacteroidetes/Bacteroidia/Cytophagales/Bernardetiaceae/uncultured	0	0	0	0	0	0	0	0	0	0	0	0	0	0	0	0	0	0	0	0	0	0	0	0	0	0	0	0	0	0	0	0	0	0	0	0	0	0	0	0	0	0	0	0	0
Bacteria/Bacteroidetes/Bacteroidia/Cytophagales/Cyclobacteriaceae/Algoriphagus	57	0	0	0	0	0	42	0	0	0	0	0	54	0	60	0	55	0	0	0	0	0	0	0	0	66	0	0	0	0	0	0	0	0	48	0	0	0	0	0	0	0	0	0	0
Bacteria/Bacteroidetes/Bacteroidia/Cytophagales/Cyclobacteriaceae/Aquiflexum	0	0	0	0	0	0	0	0	0	0	0	0	0	0	0	0	0	0	0	0	0	0	0	0	0	0	0	0	0	0	0	0	0	0	0	0	0	0	0	0	0	0	0	0	0
Bacteria/Bacteroidetes/Bacteroidia/Cytophagales/Cyclobacteriaceae/Belliella	0	0	0	0	0	0	0	0	0	0	0	0	0	0	0	0	0	0	0	0	0	0	0	0	0	0	0	0	0	0	0	0	0	0	0	0	0	0	0	0	0	0	0	0	0
Bacteria/Bacteroidetes/Bacteroidia/Cytophagales/Cyclobacteriaceae/Catalinimonas	0	0	0	0	0	0	0	0	0	0	0	0	0	0	0	0	0	0	0	0	0	0	0	0	0	0	0	0	0	0	0	0	0	0	0	0	0	0	0	0	0	0	0	0	0
Bacteria/Bacteroidetes/Bacteroidia/Cytophagales/Cyclobacteriaceae/Cesiribacter	0	0	0	0	0	0	0	0	0	0	0	0	0	0	0	0	0	0	0	0	0	0	0	0	0	0	0	0	0	0	0	0	0	0	0	0	0	0	0	0	0	0	0	0	0
Bacteria/Bacteroidetes/Bacteroidia/Cytophagales/Cyclobacteriaceae/Cyclobacterium	0	0	0	0	0	0	0	0	0	0	0	0	0	0	0	0	0	0	0	0	0	0	0	0	0	0	0	0	0	0	0	0	0	0	0	0	0	0	0	0	0	0	0	0	0
Bacteria/Bacteroidetes/Bacteroidia/Cytophagales/Cyclobacteriaceae/Echinicola	0	0	0	0	0	0	0	0	0	0	0	0	0	0	0	0	0	0	0	0	0	0	0	0	0	0	0	0	0	0	0	0	0	0	0	0	0	0	0	0	0	0	0	0	0
Bacteria/Bacteroidetes/Bacteroidia/Cytophagales/Cyclobacteriaceae/Ekhidna	0	0	0	0	0	0	0	0	0	0	0	0	0	0	0	0	0	0	0	0	0	0	0	0	0	0	0	0	0	0	0	0	0	0	0	0	0	0	0	0	0	0	0	0	0
Bacteria/Bacteroidetes/Bacteroidia/Cytophagales/Cyclobacteriaceae/Fabibacter	0	0	0	0	0	0	0	0	0	0	0	0	0	0	0	0	0	0	0	0	0	0	0	0	0	0	0	0	0	0	0	0	0	0	0	0	0	0	0	0	0	0	0	0	0
Bacteria/Bacteroidetes/Bacteroidia/Cytophagales/Cyclobacteriaceae/Fulvitalea	0	0	0	0	0	0	0	0	0	0	0	0	0	0	0	0	0	0	0	0	0	0	0	0	0	0	0	0	0	0	0	0	0	0	0	0	0	0	0	0	0	0	0	0	0
Bacteria/Bacteroidetes/Bacteroidia/Cytophagales/Cyclobacteriaceae/Fulvivirga	0	0	0	0	0	0	0	0	0	0	0	0	0	0	0	0	0	0	0	0	0	0	0	0	0	0	0	0	0	0	0	0	0	0	0	0	0	0	0	0	0	0	0	0	0
Bacteria/Bacteroidetes/Bacteroidia/Cytophagales/Cyclobacteriaceae/Imperialibacter	0	0	0	0	0	0	0	0	0	0	0	0	0	0	0	0	0	0	0	0	0	0	0	0	0	0	0	0	0	0	0	0	0	0	0	0	0	0	0	0	0	0	0	0	0
Bacteria/Bacteroidetes/Bacteroidia/Cytophagales/Cyclobacteriaceae/Indibacter	0	0	0	0	0	0	0	0	0	0	0	0	0	0	0	0	0	0	0	0	0	0	0	0	0	0	0	0	0	0	0	0	0	0	0	0	0	0	0	0	0	0	0	0	0
Bacteria/Bacteroidetes/Bacteroidia/Cytophagales/Cyclobacteriaceae/Lunatimonas	0	0	0	0	0	0	0	0	0	0	0	0	0	0	0	0	0	0	0	0	0	0	0	0	0	0	0	0	0	0	0	0	0	0	0	0	0	0	0	0	0	0	0	0	0
Bacteria/Bacteroidetes/Bacteroidia/Cytophagales/Cyclobacteriaceae/Marinoscillum	0	0	0	0	0	0	0	0	0	0	0	0	0	0	0	0	0	0	0	0	0	0	0	0	0	0	0	0	0	0	0	0	0	0	0	0	0	0	0	0	0	0	0	0	0
Bacteria/Bacteroidetes/Bacteroidia/Cytophagales/Cyclobacteriaceae/Marivirga	0	0	0	0	0	0	0	0	0	0	0	0	0	0	0	0	0	0	0	0	0	0	0	0	0	0	0	0	0	0	0	0	0	0	0	0	0	0	0	0	0	0	0	0	0
Bacteria/Bacteroidetes/Bacteroidia/Cytophagales/Cyclobacteriaceae/Mongoliicoccus	0	0	0	0	0	0	0	0	0	0	0	0	0	0	0	0	0	0	0	0	0	0	0	0	0	0	0	0	0	0	0	0	0	0	0	0	0	0	0	0	0	0	0	0	0
Bacteria/Bacteroidetes/Bacteroidia/Cytophagales/Cyclobacteriaceae/Nafulsella	0	0	0	0	0	0	0	0	0	0	0	0	0	0	0	0	0	0	0	0	0	0	0	0	0	0	0	0	0	0	0	0	0	0	0	0	0	0	0	0	0	0	0	0	0
Bacteria/Bacteroidetes/Bacteroidia/Cytophagales/Cyclobacteriaceae/Nitritalea	0	0	0	0	0	0	0	0	0	0	0	0	0	0	0	0	0	0	0	0	0	0	0	0	0	0	0	0	0	0	0	0	0	0	0	0	0	0	0	0	0	0	0	0	0
Bacteria/Bacteroidetes/Bacteroidia/Cytophagales/Cyclobacteriaceae/Persicobacter	0	0	0	0	0	0	0	0	0	0	0	0	0	0	0	0	0	0	0	0	0	0	0	0	0	0	0	0	0	0	0	0	0	0	0	0	0	0	0	0	0	0	0	0	0
Bacteria/Bacteroidetes/Bacteroidia/Cytophagales/Cyclobacteriaceae/Reichenbachiella	0	0	0	0	0	0	0	0	0	0	0	0	0	0	0	0	0	0	0	0	0	0	0	0	0	0	0	0	0	0	0	0	0	0	0	0	0	0	0	0	0	0	0	0	0
Bacteria/Bacteroidetes/Bacteroidia/Cytophagales/Cyclobacteriaceae/Roseivirga	0	0	0	0	0	0	0	0	0	0	0	0	0	0	0	0	0	0	0	0	0	0	0	0	0	0	0	0	0	0	0	0	0	0	0	0	0	0	0	0	0	0	0	0	0
Bacteria/Bacteroidetes/Bacteroidia/Cytophagales/Cyclobacteriaceae/Tunicatimonas	0	0	0	0	0	0	0	0	0	0	0	0	0	0	0	0	0	0	0	0	0	0	0	0	0	0	0	0	0	0	0	0	0	0	0	0	0	0	0	0	0	0	0	0	0
Bacteria/Bacteroidetes/Bacteroidia/Cytophagales/Cyclobacteriaceae/uncultured	169	85	102	100	120	91	203	165	166	126	116	114	150	108	161	105	120	64	162	146	115	89	97	102	120	124	129	179	81	146	114	109	91	202	185	179	113	105	114	120	103	123	130	170	158
Bacteria/Bacteroidetes/Bacteroidia/Cytophagales/Cytophagaceae/Cytophaga	0	0	0	0	0	0	0	0	0	0	0	0	0	0	0	0	0	0	0	0	0	0	0	0	0	0	0	0	0	0	0	0	0	0	0	0	0	0	0	0	0	0	0	0	0
Bacteria/Bacteroidetes/Bacteroidia/Cytophagales/Cytophagaceae/Rhodocytophaga	0	0	0	0	0	0	0	0	0	0	0	0	0	0	0	0	0	0	0	0	0	0	0	0	0	0	0	0	0	0	0	0	0	0	0	0	0	0	0	0	0	0	0	0	0
Bacteria/Bacteroidetes/Bacteroidia/Cytophagales/Cytophagaceae/Sporocytophaga	0	0	0	0	0	0	0	0	0	0	0	0	0	0	0	0	0	0	0	0	0	0	0	0	0	0	0	0	0	0	0	0	0	0	0	0	0	0	0	0	0	0	0	0	0
Bacteria/Bacteroidetes/Bacteroidia/Cytophagales/Cytophagaceae/uncultured	0	0	0	0	0	0	0	0	0	0	0	0	0	0	0	0	0	0	0	0	0	0	0	0	0	0	0	0	0	0	0	0	0	0	0	0	0	0	0	0	0	0	0	0	0
Bacteria/Bacteroidetes/Bacteroidia/Cytophagales/Flammeovirgaceae/Flammeovirga	0	0	0	0	0	0	0	0	0	0	0	0	0	0	0	0	0	0	0	0	0	0	0	0	0	0	0	0	0	0	0	0	0	0	0	0	0	0	0	0	0	0	0	0	0
Bacteria/Bacteroidetes/Bacteroidia/Cytophagales/Flammeovirgaceae/Flexithrix	0	0	0	0	0	0	0	0	0	0	0	0	0	0	0	0	0	0	0	0	0	0	0	0	0	0	0	0	0	0	0	0	0	0	0	0	0	0	0	0	0	0	0	0	0
Bacteria/Bacteroidetes/Bacteroidia/Cytophagales/Flammeovirgaceae/Limibacter	0	0	0	0	0	0	0	0	0	0	0	0	0	0	0	0	0	0	0	0	0	0	0	0	0	0	0	0	0	0	0	0	0	0	0	0	0	0	0	0	0	0	0	0	0
Bacteria/Bacteroidetes/Bacteroidia/Cytophagales/Flammeovirgaceae/Luteivirga	0	0	0	0	0	0	0	0	0	0	0	0	0	0	0	0	0	0	0	0	0	0	0	0	0	0	0	0	0	0	0	0	0	0	0	0	0	0	0	0	0	0	0	0	0
Bacteria/Bacteroidetes/Bacteroidia/Cytophagales/Flammeovirgaceae/Perexilibacter	0	0	0	0	0	0	0	0	0	0	0	0	0	0	0	0	0	0	0	0	0	0	0	0	0	0	0	0	0	0	0	0	0	0	0	0	0	0	0	0	0	0	0	0	0
Bacteria/Bacteroidetes/Bacteroidia/Cytophagales/Flammeovirgaceae/Rapidithrix	0	0	0	0	0	0	0	0	0	0	0	0	0	0	0	0	0	0	0	0	0	0	0	0	0	0	0	0	0	0	0	0	0	0	0	0	0	0	0	0	0	0	0	0	0
Bacteria/Bacteroidetes/Bacteroidia/Cytophagales/Flammeovirgaceae/Sediminitomix	0	0	0	0	0	0	0	0	0	0	0	0	0	0	0	0	0	0	0	0	0	0	0	0	0	0	0	0	0	0	0	0	0	0	0	0	0	0	0	0	0	0	0	0	0
Bacteria/Bacteroidetes/Bacteroidia/Cytophagales/Flammeovirgaceae/uncultured	0	0	0	0	0	0	0	0	0	0	0	0	0	0	0	0	0	0	0	0	0	0	0	0	0	0	0	0	0	0	0	0	0	0	0	0	0	0	0	0	0	0	0	0	0
Bacteria/Bacteroidetes/Bacteroidia/Cytophagales/Hymenobacteraceae/Adhaeribacter	0	0	0	0	0	0	0	0	0	0	0	0	0	0	0	0	0	0	0	0	0	0	0	0	0	0	0	0	0	0	0	0	0	0	0	0	0	0	0	0	0	0	0	0	0
Bacteria/Bacteroidetes/Bacteroidia/Cytophagales/Hymenobacteraceae/Hymenobacter	0	0	0	0	0	0	0	0	0	0	0	0	0	0	0	0	0	0	0	0	0	0	0	0	0	0	0	0	0	0	0	0	0	0	0	0	0	0	0	0	0	0	0	0	0
Bacteria/Bacteroidetes/Bacteroidia/Cytophagales/Hymenobacteraceae/Nibribacter	0	0	0	0	0	0	0	0	0	0	0	0	0	0	0	0	0	0	0	0	0	0	0	0	0	0	0	0	0	0	0	0	0	0	0	0	0	0	0	0	0	0	0	0	0
Bacteria/Bacteroidetes/Bacteroidia/Cytophagales/Hymenobacteraceae/Pontibacter	0	0	0	0	0	0	0	0	0	0	0	0	0	0	0	0	0	0	0	0	0	0	0	0	0	0	0	0	0	0	0	0	0	0	0	0	0	0	0	0	0	0	0	0	0
Bacteria/Bacteroidetes/Bacteroidia/Cytophagales/Hymenobacteraceae/Rufibacter	0	0	0	0	0	0	0	0	0	0	0	0	0	0	0	0	0	0	0	0	0	0	0	0	0	0	0	0	0	0	0	0	0	0	0	0	0	0	0	0	0	0	0	0	0
Bacteria/Bacteroidetes/Bacteroidia/Cytophagales/Microscillaceae/Chryseolinea	0	0	0	0	0	0	70	58	40	0	0	0	0	0	0	0	79	46	34	38	40	0	0	0	0	0	0	0	0	0	44	0	0	52	46	29	0	0	0	55	46	0	35	59	60
Bacteria/Bacteroidetes/Bacteroidia/Cytophagales/Microscillaceae/Flexibacter	0	0	0	0	0	0	0	0	0	0	0	0	0	0	0	0	0	0	0	0	0	0	0	0	0	0	0	0	0	0	0	0	0	0	0	0	0	0	0	0	0	0	0	0	0
Bacteria/Bacteroidetes/Bacteroidia/Cytophagales/Microscillaceae/Microscilla	0	0	0	0	0	0	0	0	0	0	0	0	0	0	0	0	0	0	0	0	0	0	0	0	0	0	0	0	0	0	0	0	0	0	0	0	0	0	0	0	0	0	0	0	0
Bacteria/Bacteroidetes/Bacteroidia/Cytophagales/Microscillaceae/Ohtaekwangia	0	0	0	0	0	0	0	0	0	0	0	0	0	0	0	0	0	0	0	0	0	0	0	0	0	0	0	0	0	0	0	0	0	0	0	0	0	0	0	0	0	0	0	0	0
Bacteria/Bacteroidetes/Bacteroidia/Cytophagales/Microscillaceae/OLB12	0	0	0	0	0	0	0	0	0	0	0	0	0	0	0	0	0	0	0	83	0	0	0	0	0	0	0	0	0	0	0	0	0	0	0	0	0	0	0	0	0	0	0	0	0
Bacteria/Bacteroidetes/Bacteroidia/Cytophagales/Microscillaceae/Siphonobacter	0	0	0	0	0	0	0	0	0	0	0	0	0	0	0	0	0	0	0	0	0	0	0	0	0	0	0	0	0	0	0	0	0	0	0	0	0	0	0	0	0	0	0	0	0
Bacteria/Bacteroidetes/Bacteroidia/Cytophagales/Microscillaceae/Thermoflexibacter	0	0	0	0	0	0	0	0	0	0	0	0	0	0	0	0	0	0	0	0	0	0	0	0	0	0	0	0	0	0	0	0	0	0	0	0	0	0	0	0	0	0	0	0	0
Bacteria/Bacteroidetes/Bacteroidia/Cytophagales/Microscillaceae/uncultured	123	43	51	47	49	58	218	111	157	76	51	68	74	74	58	118	80	0	134	115	78	58	88	86	58	117	100	109	66	67	93	128	75	208	143	141	70	86	64	122	77	100	112	160	144
Bacteria/Bacteroidetes/Bacteroidia/Cytophagales/Spirosomaceae/Arcicella	0	0	0	0	0	0	0	0	0	0	0	0	0	0	0	0	0	0	0	0	0	0	0	0	0	0	0	0	0	0	0	0	0	0	0	0	0	0	0	0	0	0	0	0	0
Bacteria/Bacteroidetes/Bacteroidia/Cytophagales/Spirosomaceae/Dyadobacter	0	0	0	0	0	0	0	0	0	0	0	0	0	0	0	0	0	0	0	0	0	0	0	0	0	0	0	0	0	0	0	0	0	0	0	0	0	0	0	0	0	0	0	0	0
Bacteria/Bacteroidetes/Bacteroidia/Cytophagales/Spirosomaceae/Emticicia	0	0	0	0	0	0	0	0	0	0	0	0	0	0	0	0	0	0	0	0	0	0	0	0	0	0	0	0	0	0	0	0	0	0	0	0	0	0	0	0	0	0	0	0	0
Bacteria/Bacteroidetes/Bacteroidia/Cytophagales/Spirosomaceae/Fibrella	0	0	0	0	0	0	0	0	0	0	0	0	0	0	0	0	0	0	0	0	0	0	0	0	0	0	0	0	0	0	0	0	0	0	0	0	0	0	0	0	0	0	0	0	0
Bacteria/Bacteroidetes/Bacteroidia/Cytophagales/Spirosomaceae/Lacihabitans	0	0	0	0	0	0	0	0	0	0	0	0	0	0	0	0	0	0	0	0	0	0	0	0	0	0	0	0	0	0	0	0	0	0	0	0	0	0	0	0	0	0	0	0	0
Bacteria/Bacteroidetes/Bacteroidia/Cytophagales/Spirosomaceae/Larkinella	0	0	0	0	0	0	0	0	0	0	0	0	0	0	0	0	0	0	0	0	0	0	0	0	0	0	0	0	0	0	0	0	0	0	0	0	0	0	0	0	0	0	0	0	0
Bacteria/Bacteroidetes/Bacteroidia/Cytophagales/Spirosomaceae/Leadbetterella	0	0	0	0	0	0	0	0	0	0	0	0	0	0	0	0	0	0	0	0	0	0	0	0	0	0	0	0	0	0	0	0	0	0	0	0	0	0	0	0	0	0	0	0	0
Bacteria/Bacteroidetes/Bacteroidia/Cytophagales/Spirosomaceae/Persicitalea	0	0	0	0	0	0	0	0	0	0	0	0	0	0	0	0	0	0	0	0	0	0	0	0	0	0	0	0	0	0	0	0	0	0	0	0	0	0	0	0	0	0	0	0	0
Bacteria/Bacteroidetes/Bacteroidia/Cytophagales/Spirosomaceae/Pseudarcicella	0	0	0	0	0	0	0	0	0	0	0	0	0	0	0	0	0	0	0	0	0	0	0	0	0	0	0	0	0	0	0	0	0	0	0	0	0	0	0	0	0	0	0	0	0
Bacteria/Bacteroidetes/Bacteroidia/Cytophagales/Spirosomaceae/Rudanella	0	0	0	0	0	0	0	0	0	0	0	0	0	0	0	0	0	0	0	0	0	0	0	0	0	0	0	0	0	0	0	0	0	0	0	0	0	0	0	0	0	0	0	0	0
Bacteria/Bacteroidetes/Bacteroidia/Cytophagales/Spirosomaceae/Runella	0	0	0	0	0	0	0	0	0	0	0	0	0	0	0	0	0	0	0	0	0	0	0	0	0	0	0	0	0	0	0	0	0	0	0	0	0	0	0	0	0	0	0	0	0
Bacteria/Bacteroidetes/Bacteroidia/Cytophagales/Spirosomaceae/Spirosoma	0	0	0	0	0	0	0	0	0	0	0	0	0	0	0	0	0	0	0	0	0	0	0	0	0	0	0	0	0	0	0	0	0	0	0	0	0	0	0	0	0	0	0	0	0
Bacteria/Bacteroidetes/Bacteroidia/Cytophagales/Spirosomaceae/Taeseokella	0	0	0	0	0	0	0	0	0	0	0	0	0	0	0	0	0	0	0	0	0	0	0	0	0	0	0	0	0	0	0	0	0	0	0	0	0	0	0	0	0	0	0	0	0
Bacteria/Bacteroidetes/Bacteroidia/Cytophagales/Spirosomaceae/uncultured	0	0	0	0	0	0	0	0	0	0	0	0	0	0	0	0	0	0	0	0	0	0	0	0	0	0	0	0	0	0	0	0	0	0	0	0	0	0	0	0	0	0	0	0	0
Bacteria/Bacteroidetes/Bacteroidia/Flavobacteriales/Blattabacteriaceae/Blattabacterium	0	0	0	0	0	0	0	0	0	0	0	0	0	0	0	0	0	0	0	0	0	0	0	0	0	0	0	0	0	0	0	0	0	0	0	0	0	0	0	0	0	0	0	0	0
Bacteria/Bacteroidetes/Bacteroidia/Flavobacteriales/Blattabacteriaceae/Candidatus Brownia	0	0	0	0	0	0	0	0	0	0	0	0	0	0	0	0	0	0	0	0	0	0	0	0	0	0	0	0	0	0	0	0	0	0	0	0	0	0	0	0	0	0	0	0	0
Bacteria/Bacteroidetes/Bacteroidia/Flavobacteriales/Blattabacteriaceae/Candidatus Sulcia	0	0	0	0	0	0	0	0	0	0	0	0	0	0	0	0	0	0	0	0	0	0	0	0	0	0	0	0	0	0	0	0	0	0	0	0	0	0	0	0	0	0	0	0	0
Bacteria/Bacteroidetes/Bacteroidia/Flavobacteriales/Blattabacteriaceae/Candidatus Uzinura	0	0	0	0	0	0	0	0	0	0	0	0	0	0	0	0	0	0	0	0	0	0	0	0	0	0	0	0	0	0	0	0	0	0	0	0	0	0	0	0	0	0	0	0	0
Bacteria/Bacteroidetes/Bacteroidia/Flavobacteriales/Blattabacteriaceae/uncultured	0	0	0	0	0	0	0	0	0	0	0	0	0	0	0	0	0	0	0	0	0	0	0	0	0	0	0	0	0	0	0	0	0	0	0	0	0	0	0	0	0	0	0	0	0
Bacteria/Bacteroidetes/Bacteroidia/Flavobacteriales/Crocinitomicaceae/Brumimicrobium	0	0	0	0	0	0	0	0	0	0	0	0	0	0	0	0	0	0	0	0	0	0	0	0	0	0	0	0	0	0	0	0	0	0	0	0	0	0	0	0	0	0	0	0	0
Bacteria/Bacteroidetes/Bacteroidia/Flavobacteriales/Crocinitomicaceae/Crocinitomix	0	0	0	0	0	0	61	0	26	0	0	0	0	0	0	0	0	0	0	0	0	0	0	0	0	0	0	0	0	0	0	0	0	0	0	0	0	0	0	0	0	0	0	0	0
Bacteria/Bacteroidetes/Bacteroidia/Flavobacteriales/Crocinitomicaceae/Fluviicola	88	62	35	48	33	27	48	29	34	38	0	35	45	34	64	29	34	23	43	38	31	34	39	59	66	78	62	38	0	35	0	28	23	23	29	41	59	42	52	42	39	0	45	30	24
Bacteria/Bacteroidetes/Bacteroidia/Flavobacteriales/Crocinitomicaceae/Lishizhenia	0	0	0	0	0	0	0	0	0	0	0	0	0	0	0	0	0	0	0	0	0	0	0	0	0	0	0	0	0	0	0	0	0	0	0	0	0	0	0	0	0	0	0	0	0
Bacteria/Bacteroidetes/Bacteroidia/Flavobacteriales/Crocinitomicaceae/Salinirepens	0	0	0	0	0	0	0	0	0	0	0	0	0	0	0	0	0	0	0	0	0	0	0	0	0	0	0	0	0	0	0	0	0	0	0	0	0	0	0	0	0	0	0	0	0
Bacteria/Bacteroidetes/Bacteroidia/Flavobacteriales/Crocinitomicaceae/uncultured	17	28	0	0	0	0	42	0	32	29	0	0	23	23	18	28	0	0	25	16	25	16	0	31	0	28	29	0	0	0	0	0	0	22	30	21	0	17	17	0	0	0	26	20	20
Bacteria/Bacteroidetes/Bacteroidia/Flavobacteriales/Crocinitomicaceae/Wandonia	0	0	0	0	0	0	0	0	0	0	0	0	0	0	0	0	0	0	0	0	0	0	0	0	0	0	0	0	0	0	0	0	0	0	0	0	0	0	0	0	0	0	0	0	0
Bacteria/Bacteroidetes/Bacteroidia/Flavobacteriales/Cryomorphaceae/Cryomorpha	0	0	0	0	0	0	0	0	0	0	0	0	0	0	0	0	0	0	0	0	0	0	0	0	0	0	0	0	0	0	0	0	0	0	0	0	0	0	0	0	0	0	0	0	0
Bacteria/Bacteroidetes/Bacteroidia/Flavobacteriales/Cryomorphaceae/Luteibaculum	0	0	0	0	0	0	0	0	0	0	0	0	0	0	0	0	0	0	0	0	0	0	0	0	0	0	0	0	0	0	0	0	0	0	0	0	0	0	0	0	0	0	0	0	0
Bacteria/Bacteroidetes/Bacteroidia/Flavobacteriales/Cryomorphaceae/NS10 marine group	0	0	0	0	0	0	0	0	0	0	0	0	0	0	0	0	0	0	0	0	0	0	0	0	0	0	0	0	0	0	0	0	0	0	0	0	0	0	0	0	0	0	0	0	0
Bacteria/Bacteroidetes/Bacteroidia/Flavobacteriales/Cryomorphaceae/Owenweeksia	0	0	0	0	0	0	0	0	0	0	0	0	0	0	0	0	0	0	0	0	0	0	0	0	0	0	0	0	0	0	0	0	0	0	0	0	0	0	0	0	0	0	0	0	0
Bacteria/Bacteroidetes/Bacteroidia/Flavobacteriales/Cryomorphaceae/Phaeocystidibacter	0	0	0	0	0	0	0	0	0	0	0	0	0	0	0	0	0	0	0	0	0	0	0	0	0	0	0	0	0	0	0	0	0	0	0	0	0	0	0	0	0	0	0	0	0
Bacteria/Bacteroidetes/Bacteroidia/Flavobacteriales/Cryomorphaceae/uncultured	82	42	52	47	51	32	82	47	63	42	47	39	73	56	67	57	36	21	50	66	52	22	39	33	41	45	46	53	41	55	59	36	48	57	63	63	37	26	43	57	42	34	39	50	45
Bacteria/Bacteroidetes/Bacteroidia/Flavobacteriales/Flavobacteriaceae/[Polaribacter] huanghezhanensis	0	0	0	0	0	0	0	0	0	0	0	0	0	0	0	0	0	0	0	0	0	0	0	0	0	0	0	0	0	0	0	0	0	0	0	0	0	0	0	0	0	0	0	0	0
Bacteria/Bacteroidetes/Bacteroidia/Flavobacteriales/Flavobacteriaceae/Actibacter	29	0	0	0	0	0	38	0	0	0	0	0	0	0	0	0	40	0	0	0	0	0	0	0	0	0	0	0	0	0	0	0	0	0	0	0	0	0	0	0	0	0	0	0	0
Bacteria/Bacteroidetes/Bacteroidia/Flavobacteriales/Flavobacteriaceae/Aequorivita	0	0	0	0	0	0	0	0	0	0	0	0	0	0	0	0	0	0	0	0	0	0	0	0	0	0	0	0	0	0	0	0	0	0	0	0	0	0	0	0	0	0	0	0	0
Bacteria/Bacteroidetes/Bacteroidia/Flavobacteriales/Flavobacteriaceae/Aestuariibaculum	0	0	0	0	0	0	0	0	0	0	0	0	0	0	0	0	0	0	0	0	0	0	0	0	0	0	0	0	0	0	0	0	0	0	0	0	0	0	0	0	0	0	0	0	0
Bacteria/Bacteroidetes/Bacteroidia/Flavobacteriales/Flavobacteriaceae/Algibacter	0	0	0	0	0	0	0	0	0	0	0	0	0	0	0	0	0	0	0	0	0	0	0	0	0	0	0	0	0	0	0	0	0	0	0	0	0	0	0	0	0	0	0	0	0
Bacteria/Bacteroidetes/Bacteroidia/Flavobacteriales/Flavobacteriaceae/Algitalea	0	0	0	0	0	0	0	0	0	0	0	0	0	0	0	0	0	0	0	0	0	0	0	0	0	0	0	0	0	0	0	0	0	0	0	0	0	0	0	0	0	0	0	0	0
Bacteria/Bacteroidetes/Bacteroidia/Flavobacteriales/Flavobacteriaceae/Aquibacter	0	0	0	0	0	0	0	0	0	0	0	0	0	0	0	0	0	0	0	0	0	53	0	0	0	0	0	0	0	0	0	0	0	0	0	0	0	0	0	0	0	0	0	0	0
Bacteria/Bacteroidetes/Bacteroidia/Flavobacteriales/Flavobacteriaceae/Aquimarina	0	0	0	0	0	0	0	0	0	0	0	0	0	0	0	0	0	0	0	0	0	0	0	0	0	0	0	0	0	0	0	0	0	0	0	0	0	0	0	0	0	0	0	0	0
Bacteria/Bacteroidetes/Bacteroidia/Flavobacteriales/Flavobacteriaceae/Arcticiflavibacter	0	0	0	0	0	0	0	0	0	0	0	0	0	0	0	0	0	0	0	0	0	0	0	0	0	0	0	0	0	0	0	0	0	0	0	0	0	0	0	0	0	0	0	0	0
Bacteria/Bacteroidetes/Bacteroidia/Flavobacteriales/Flavobacteriaceae/Arenibacter	0	0	0	0	0	0	0	0	0	0	0	0	0	0	0	0	0	0	0	0	0	0	0	0	0	0	0	0	0	0	0	0	0	0	0	0	0	0	0	0	0	0	0	0	0
Bacteria/Bacteroidetes/Bacteroidia/Flavobacteriales/Flavobacteriaceae/Arenitalea	0	0	0	0	0	0	0	0	0	0	0	0	0	0	0	0	0	0	0	0	0	0	0	0	0	0	0	0	0	0	0	0	0	0	0	0	0	0	0	0	0	0	0	0	0
Bacteria/Bacteroidetes/Bacteroidia/Flavobacteriales/Flavobacteriaceae/Ascidiimonas	0	0	0	0	0	0	0	0	0	0	0	0	0	0	0	0	0	0	0	0	0	0	0	0	0	0	0	0	0	0	0	0	0	0	0	0	0	0	0	0	0	0	0	0	0
Bacteria/Bacteroidetes/Bacteroidia/Flavobacteriales/Flavobacteriaceae/Aurantivirga	0	0	0	0	0	0	0	0	0	0	0	0	0	0	0	0	0	0	0	0	0	0	0	0	0	0	0	0	0	0	0	0	0	0	0	0	0	0	0	0	0	0	0	0	0
Bacteria/Bacteroidetes/Bacteroidia/Flavobacteriales/Flavobacteriaceae/Aureicoccus	0	0	0	0	0	0	0	0	0	0	0	0	0	0	0	0	0	0	0	0	0	0	0	0	0	0	0	0	0	0	0	0	0	0	0	0	0	0	0	0	0	0	0	0	0
Bacteria/Bacteroidetes/Bacteroidia/Flavobacteriales/Flavobacteriaceae/Aureimarina	0	0	0	0	0	0	0	0	0	0	0	0	0	0	0	0	0	0	0	0	0	0	0	0	0	0	0	0	0	0	0	0	0	0	0	0	0	0	0	0	0	0	0	0	0
Bacteria/Bacteroidetes/Bacteroidia/Flavobacteriales/Flavobacteriaceae/Aureisphaera	0	0	0	0	0	0	0	0	0	0	0	0	0	0	0	0	0	0	0	0	0	0	0	0	0	0	0	0	0	0	0	0	0	0	0	0	0	0	0	0	0	0	0	0	0
Bacteria/Bacteroidetes/Bacteroidia/Flavobacteriales/Flavobacteriaceae/Bizionia	0	0	0	0	0	0	0	0	0	0	0	0	0	0	0	0	0	0	0	0	0	0	0	0	0	0	0	0	0	0	0	0	0	0	0	0	0	0	0	0	0	0	0	0	0
Bacteria/Bacteroidetes/Bacteroidia/Flavobacteriales/Flavobacteriaceae/Capnocytophaga	0	0	0	0	0	0	0	0	0	0	0	0	0	0	0	0	0	0	0	0	0	0	0	0	0	0	0	0	0	0	0	0	0	0	0	0	0	0	0	0	0	0	0	0	0
Bacteria/Bacteroidetes/Bacteroidia/Flavobacteriales/Flavobacteriaceae/Cellulophaga	0	0	0	0	0	0	0	0	0	0	0	0	0	0	0	0	0	0	0	0	0	0	0	0	0	0	0	0	0	0	0	0	0	0	0	0	0	0	0	0	0	0	0	0	0
Bacteria/Bacteroidetes/Bacteroidia/Flavobacteriales/Flavobacteriaceae/Citreitalea	0	0	0	0	0	0	0	0	0	0	0	0	0	0	0	0	0	0	0	0	0	0	0	0	0	0	0	0	0	0	0	0	0	0	0	0	0	0	0	0	0	0	0	0	0
Bacteria/Bacteroidetes/Bacteroidia/Flavobacteriales/Flavobacteriaceae/Coenonia	0	0	0	0	0	0	0	0	0	0	0	0	0	0	0	0	0	0	0	0	0	0	0	0	0	0	0	0	0	0	0	0	0	0	0	0	0	0	0	0	0	0	0	0	0
Bacteria/Bacteroidetes/Bacteroidia/Flavobacteriales/Flavobacteriaceae/Confluentibacter	0	0	0	0	0	0	0	0	0	0	0	0	0	0	0	0	0	0	0	0	0	0	0	0	0	0	0	0	0	0	0	0	0	0	0	0	0	0	0	0	0	0	0	0	0
Bacteria/Bacteroidetes/Bacteroidia/Flavobacteriales/Flavobacteriaceae/Costertonia	0	0	0	0	0	0	0	0	0	0	0	0	0	0	0	0	0	0	0	0	0	0	0	0	0	0	0	0	0	0	0	0	0	0	0	0	0	0	0	0	0	0	0	0	0
Bacteria/Bacteroidetes/Bacteroidia/Flavobacteriales/Flavobacteriaceae/Croceibacter	0	0	0	0	0	0	0	0	0	0	0	0	0	0	0	0	0	0	0	0	0	0	0	0	0	0	0	0	0	0	0	0	0	0	0	0	0	0	0	0	0	0	0	0	0
Bacteria/Bacteroidetes/Bacteroidia/Flavobacteriales/Flavobacteriaceae/Croceitalea	0	0	0	0	0	0	0	0	0	0	0	0	0	0	0	0	0	0	0	0	0	0	0	0	0	0	0	0	0	0	0	0	0	0	0	0	0	0	0	0	0	0	0	0	0
Bacteria/Bacteroidetes/Bacteroidia/Flavobacteriales/Flavobacteriaceae/Dokdonia	0	0	0	0	0	0	0	0	0	0	0	0	0	0	0	0	0	0	0	0	0	0	0	0	0	0	0	0	0	0	0	0	0	0	0	0	0	0	0	0	0	0	0	0	0
Bacteria/Bacteroidetes/Bacteroidia/Flavobacteriales/Flavobacteriaceae/Eudoraea	0	0	0	0	0	0	0	0	0	0	0	0	0	0	0	0	0	0	0	0	0	0	0	0	0	0	0	0	0	0	0	0	0	0	0	0	0	0	0	0	0	0	0	0	0
Bacteria/Bacteroidetes/Bacteroidia/Flavobacteriales/Flavobacteriaceae/Euzebyella	0	0	0	0	0	0	0	0	0	0	0	0	0	0	0	0	0	0	0	0	0	0	0	0	0	0	0	0	0	0	0	0	0	0	0	0	0	0	0	0	0	0	0	0	0
Bacteria/Bacteroidetes/Bacteroidia/Flavobacteriales/Flavobacteriaceae/Flavicella	0	0	0	0	0	0	0	0	0	0	0	0	0	0	0	0	0	0	0	0	0	0	0	0	0	0	0	0	0	0	0	0	0	0	0	0	0	0	0	0	0	0	0	0	0
Bacteria/Bacteroidetes/Bacteroidia/Flavobacteriales/Flavobacteriaceae/Flavimarina	0	0	0	0	0	0	0	0	0	0	0	0	0	0	0	0	0	0	0	0	0	0	0	0	0	0	0	0	0	0	0	0	0	0	0	0	0	0	0	0	0	0	0	0	0
Bacteria/Bacteroidetes/Bacteroidia/Flavobacteriales/Flavobacteriaceae/Flavobacterium	237	131	141	114	104	102	152	186	149	97	68	83	312	206	298	176	158	142	140	180	111	170	148	138	208	208	210	148	124	121	154	152	61	197	221	108	129	153	107	162	139	99	133	185	216
Bacteria/Bacteroidetes/Bacteroidia/Flavobacteriales/Flavobacteriaceae/Formosa	64	0	0	0	0	0	0	0	0	0	0	0	0	0	0	0	0	0	0	0	0	51	0	0	0	0	0	0	0	0	0	0	0	0	0	0	0	50	0	0	0	0	0	0	0
Bacteria/Bacteroidetes/Bacteroidia/Flavobacteriales/Flavobacteriaceae/Gaetbulibacter	72	0	0	0	0	0	0	0	107	0	94	76	0	69	57	0	0	0	0	0	94	0	0	0	0	0	0	0	0	0	0	0	0	0	0	104	0	0	0	0	0	0	0	0	0
Bacteria/Bacteroidetes/Bacteroidia/Flavobacteriales/Flavobacteriaceae/Galbibacter	0	0	0	0	0	0	0	0	0	0	0	0	0	0	0	0	0	0	0	0	0	0	0	0	0	0	0	0	0	0	0	0	0	0	0	0	0	0	0	0	0	0	0	0	0
Bacteria/Bacteroidetes/Bacteroidia/Flavobacteriales/Flavobacteriaceae/Gangjinia	0	0	0	0	0	0	0	0	0	0	0	0	0	0	0	0	0	0	0	0	0	0	0	0	0	0	0	0	0	0	0	0	0	0	0	0	0	0	0	0	0	0	0	0	0
Bacteria/Bacteroidetes/Bacteroidia/Flavobacteriales/Flavobacteriaceae/Gelidibacter	0	0	0	0	0	0	0	0	0	0	0	0	0	0	0	0	0	0	0	0	0	0	0	0	0	0	0	0	0	0	0	0	0	0	0	0	0	0	0	0	0	0	0	0	0
Bacteria/Bacteroidetes/Bacteroidia/Flavobacteriales/Flavobacteriaceae/Geojedonia	0	0	0	0	0	0	0	0	0	0	0	0	0	0	0	0	0	0	0	0	0	0	0	0	0	0	0	0	0	0	0	0	0	0	0	0	0	0	0	0	0	0	0	0	0
Bacteria/Bacteroidetes/Bacteroidia/Flavobacteriales/Flavobacteriaceae/Gillisia	0	0	0	0	0	0	0	0	0	0	0	0	0	0	0	0	0	0	0	0	0	0	0	0	0	0	0	0	0	0	0	0	0	0	0	0	0	0	0	0	0	0	0	0	0
Bacteria/Bacteroidetes/Bacteroidia/Flavobacteriales/Flavobacteriaceae/Gilvibacter	0	0	0	0	0	0	0	0	0	0	0	0	0	0	0	0	0	0	0	0	0	0	0	0	0	0	0	0	0	0	0	0	0	0	0	0	0	0	0	0	0	0	0	0	0
Bacteria/Bacteroidetes/Bacteroidia/Flavobacteriales/Flavobacteriaceae/Gramella	0	0	0	0	0	0	0	0	0	0	0	0	0	0	0	0	0	0	0	0	0	0	0	0	0	0	0	0	0	0	0	0	0	0	0	0	0	0	0	0	0	0	0	0	0
Bacteria/Bacteroidetes/Bacteroidia/Flavobacteriales/Flavobacteriaceae/Hoppeia	0	0	0	0	0	0	0	0	0	0	0	0	0	0	0	0	0	0	0	0	0	0	0	0	0	0	0	0	0	0	0	0	0	0	0	0	0	0	0	0	0	0	0	0	0
Bacteria/Bacteroidetes/Bacteroidia/Flavobacteriales/Flavobacteriaceae/Hyunsoonleella	0	0	0	0	0	0	0	0	0	0	0	0	0	0	0	0	0	0	0	0	0	0	0	0	0	0	0	0	0	0	0	0	0	0	0	0	0	0	0	0	0	0	0	0	0
Bacteria/Bacteroidetes/Bacteroidia/Flavobacteriales/Flavobacteriaceae/Ichthyenterobacterium	0	0	0	0	0	0	0	0	0	0	0	0	0	0	0	0	0	0	0	0	0	0	0	0	0	0	0	0	0	0	0	0	0	0	0	0	0	0	0	0	0	0	0	0	0
Bacteria/Bacteroidetes/Bacteroidia/Flavobacteriales/Flavobacteriaceae/Jejudonia	0	0	0	0	0	0	0	0	0	0	0	0	0	0	0	0	0	0	0	0	0	0	0	0	0	0	0	0	0	0	0	0	0	0	0	0	0	0	0	0	0	0	0	0	0
Bacteria/Bacteroidetes/Bacteroidia/Flavobacteriales/Flavobacteriaceae/Joostella	0	0	0	0	0	0	0	0	0	0	0	0	0	0	0	0	0	0	0	0	0	0	0	0	0	0	0	0	0	0	0	0	0	0	0	0	0	0	0	0	0	0	0	0	0
Bacteria/Bacteroidetes/Bacteroidia/Flavobacteriales/Flavobacteriaceae/Kordia	0	0	0	0	0	0	0	0	0	0	0	0	0	0	0	0	0	0	0	0	0	0	0	0	0	0	0	0	0	0	0	0	0	0	0	0	0	0	0	0	0	0	0	0	0
Bacteria/Bacteroidetes/Bacteroidia/Flavobacteriales/Flavobacteriaceae/Kriegella	0	0	0	0	0	0	0	0	0	0	0	0	0	0	0	0	0	0	0	0	0	0	0	0	0	0	0	0	0	0	0	0	0	0	0	0	0	0	0	0	0	0	0	0	0
Bacteria/Bacteroidetes/Bacteroidia/Flavobacteriales/Flavobacteriaceae/Lacinutrix	0	0	0	0	0	0	0	0	0	0	0	0	0	0	0	0	0	0	0	0	0	0	0	0	0	0	0	0	0	0	0	0	0	0	0	0	0	0	0	0	0	0	0	0	0
Bacteria/Bacteroidetes/Bacteroidia/Flavobacteriales/Flavobacteriaceae/Leeuwenhoekiella	0	0	0	0	0	0	0	0	0	0	0	0	0	0	0	0	0	0	0	0	0	0	0	0	0	0	0	0	0	0	0	0	0	0	0	0	0	0	0	0	0	0	0	0	0
Bacteria/Bacteroidetes/Bacteroidia/Flavobacteriales/Flavobacteriaceae/Leptobacterium	0	0	0	0	0	0	0	0	0	0	0	0	0	0	0	0	0	0	0	0	0	0	0	0	0	0	0	0	0	0	0	0	0	0	0	0	0	0	0	0	0	0	0	0	0
Bacteria/Bacteroidetes/Bacteroidia/Flavobacteriales/Flavobacteriaceae/Lutibacter	692	363	422	307	154	203	291	0	152	0	0	0	1610	1094	1774	461	421	395	0	0	0	190	321	300	0	227	155	160	0	159	0	0	0	0	0	0	228	261	237	0	0	0	108	0	0
Bacteria/Bacteroidetes/Bacteroidia/Flavobacteriales/Flavobacteriaceae/Lutimonas	0	0	0	0	0	0	0	0	0	0	0	0	0	0	0	0	0	0	0	0	0	0	0	0	0	0	0	0	0	0	0	0	0	0	0	0	0	0	0	0	0	0	0	0	0
Bacteria/Bacteroidetes/Bacteroidia/Flavobacteriales/Flavobacteriaceae/Maribacter	0	0	0	0	0	0	0	0	0	0	0	0	0	0	0	0	0	0	0	0	0	0	0	0	0	0	0	0	0	0	0	0	0	0	0	0	0	0	0	0	0	0	0	0	0
Bacteria/Bacteroidetes/Bacteroidia/Flavobacteriales/Flavobacteriaceae/Mariniflexile	0	0	0	0	0	0	0	0	0	0	0	0	0	0	0	0	0	0	0	0	0	0	0	0	0	0	0	0	0	0	0	0	0	0	0	0	0	0	0	0	0	0	0	0	0
Bacteria/Bacteroidetes/Bacteroidia/Flavobacteriales/Flavobacteriaceae/Maritimimonas	0	0	0	0	0	0	0	0	0	0	0	0	0	0	0	0	0	0	0	0	0	0	0	0	0	0	0	0	0	0	0	0	0	0	0	0	0	0	0	0	0	0	0	0	0
Bacteria/Bacteroidetes/Bacteroidia/Flavobacteriales/Flavobacteriaceae/Marixanthomonas	0	0	0	0	0	0	0	0	0	0	0	0	0	0	0	0	0	0	0	0	0	0	0	0	0	0	0	0	0	0	0	0	0	0	0	0	0	0	0	0	0	0	0	0	0
Bacteria/Bacteroidetes/Bacteroidia/Flavobacteriales/Flavobacteriaceae/Mesoflavibacter	0	0	0	0	0	0	0	0	0	0	0	0	0	0	0	0	0	0	0	0	0	0	0	0	0	0	0	0	0	0	0	0	0	0	0	0	0	0	0	0	0	0	0	0	0
Bacteria/Bacteroidetes/Bacteroidia/Flavobacteriales/Flavobacteriaceae/Mesonia	0	0	0	0	0	0	0	0	0	0	0	0	0	0	0	0	0	0	0	0	0	0	0	0	0	0	0	0	0	0	0	0	0	0	0	0	0	0	0	0	0	0	0	0	0
Bacteria/Bacteroidetes/Bacteroidia/Flavobacteriales/Flavobacteriaceae/Muricauda	0	0	0	0	0	0	0	0	0	0	0	0	0	0	0	0	0	0	0	0	0	0	0	0	0	0	0	0	0	0	0	0	0	0	0	0	0	0	0	0	0	0	0	0	0
Bacteria/Bacteroidetes/Bacteroidia/Flavobacteriales/Flavobacteriaceae/Muriicola	0	0	0	0	0	0	0	0	0	0	0	0	0	0	0	0	0	0	0	0	0	0	0	0	0	0	0	0	0	0	0	0	0	0	0	0	0	0	0	0	0	0	0	0	0
Bacteria/Bacteroidetes/Bacteroidia/Flavobacteriales/Flavobacteriaceae/Myroides	0	0	0	0	0	0	0	0	0	0	0	0	0	0	0	0	0	0	0	0	0	0	0	0	0	0	0	0	0	0	0	0	0	0	0	0	0	0	0	0	0	0	0	0	0
Bacteria/Bacteroidetes/Bacteroidia/Flavobacteriales/Flavobacteriaceae/Neptunitalea	0	0	0	0	0	0	0	0	0	0	0	0	0	0	0	0	0	0	0	0	0	0	0	0	0	0	0	0	0	0	0	0	0	0	0	0	0	0	0	0	0	0	0	0	0
Bacteria/Bacteroidetes/Bacteroidia/Flavobacteriales/Flavobacteriaceae/Nonlabens	0	0	0	0	0	0	0	0	0	0	0	0	0	0	0	0	0	0	0	0	0	0	0	0	0	0	0	0	0	0	0	0	0	0	0	0	0	0	0	0	0	0	0	0	0
Bacteria/Bacteroidetes/Bacteroidia/Flavobacteriales/Flavobacteriaceae/NS2b marine group	0	0	0	0	0	0	0	0	0	0	0	0	0	0	0	0	0	0	0	0	0	0	0	0	0	0	0	0	0	0	0	0	0	0	0	0	0	0	0	0	0	0	0	0	0
Bacteria/Bacteroidetes/Bacteroidia/Flavobacteriales/Flavobacteriaceae/NS3a marine group	0	0	0	0	0	0	0	0	0	0	0	0	0	0	0	0	0	0	0	0	0	0	0	0	0	0	0	0	0	0	0	0	0	0	0	0	0	0	0	0	0	0	0	0	0
Bacteria/Bacteroidetes/Bacteroidia/Flavobacteriales/Flavobacteriaceae/NS4 marine group	0	0	0	0	0	0	0	0	0	0	0	0	0	0	0	0	0	0	0	0	0	0	0	0	0	0	0	0	0	0	0	0	0	0	0	0	0	0	0	0	0	0	0	0	0
Bacteria/Bacteroidetes/Bacteroidia/Flavobacteriales/Flavobacteriaceae/NS5 marine group	0	0	0	0	0	0	0	0	0	0	0	0	0	0	0	0	0	0	0	0	0	0	0	0	0	0	0	0	0	0	0	0	0	0	0	0	0	0	0	0	0	0	0	0	0
Bacteria/Bacteroidetes/Bacteroidia/Flavobacteriales/Flavobacteriaceae/Olleya	0	0	0	0	0	0	0	0	0	0	0	0	0	0	0	0	0	0	0	0	0	0	0	0	0	0	0	0	0	0	0	0	0	0	0	0	0	0	0	0	0	0	0	0	0
Bacteria/Bacteroidetes/Bacteroidia/Flavobacteriales/Flavobacteriaceae/Pibocella	0	0	0	0	0	0	0	0	0	0	0	0	0	0	0	0	0	0	0	0	0	0	0	0	0	0	0	0	0	0	0	0	0	0	0	0	0	0	0	0	0	0	0	0	0
Bacteria/Bacteroidetes/Bacteroidia/Flavobacteriales/Flavobacteriaceae/Planktosalinus	0	0	0	0	0	0	0	0	0	0	0	0	0	0	0	0	0	0	0	0	0	0	0	0	0	0	0	0	0	0	0	0	0	0	0	0	0	0	0	0	0	0	0	0	0
Bacteria/Bacteroidetes/Bacteroidia/Flavobacteriales/Flavobacteriaceae/Polaribacter 1	0	0	0	0	0	0	0	0	0	0	0	0	0	0	0	0	0	0	0	0	0	0	0	0	0	0	0	0	0	0	0	0	0	0	0	0	0	0	0	0	0	0	0	0	0
Bacteria/Bacteroidetes/Bacteroidia/Flavobacteriales/Flavobacteriaceae/Polaribacter 2	0	0	0	0	0	0	0	0	0	0	0	0	0	0	0	0	0	0	0	0	0	0	0	0	0	0	0	0	0	0	0	0	0	0	0	0	0	0	0	0	0	0	0	0	0
Bacteria/Bacteroidetes/Bacteroidia/Flavobacteriales/Flavobacteriaceae/Polaribacter 3	0	0	0	0	0	0	0	0	0	0	0	0	0	0	0	0	0	0	0	0	0	0	0	0	0	0	0	0	0	0	0	0	0	0	0	0	0	0	0	0	0	0	0	0	0
Bacteria/Bacteroidetes/Bacteroidia/Flavobacteriales/Flavobacteriaceae/Polaribacter 4	0	0	0	0	0	0	0	0	0	0	0	0	0	0	0	0	0	0	0	0	0	0	0	0	0	0	0	0	0	0	0	0	0	0	0	0	0	0	0	0	0	0	0	0	0
Bacteria/Bacteroidetes/Bacteroidia/Flavobacteriales/Flavobacteriaceae/Polaribacter	0	0	0	0	0	0	0	0	0	0	0	0	0	0	0	0	0	0	0	0	0	0	0	0	0	0	0	0	0	0	0	0	0	0	0	0	0	0	0	0	0	0	0	0	0
Bacteria/Bacteroidetes/Bacteroidia/Flavobacteriales/Flavobacteriaceae/Pricia	0	0	0	0	0	0	0	0	0	0	0	0	0	0	0	0	0	0	0	0	0	0	0	0	0	0	0	0	0	0	0	0	0	0	0	0	0	0	0	0	0	0	0	0	0
Bacteria/Bacteroidetes/Bacteroidia/Flavobacteriales/Flavobacteriaceae/Pseudofulvibacter	0	0	0	0	0	0	0	0	0	0	0	0	0	0	0	0	0	0	0	0	0	0	0	0	0	0	0	0	0	0	0	0	0	0	0	0	0	0	0	0	0	0	0	0	0
Bacteria/Bacteroidetes/Bacteroidia/Flavobacteriales/Flavobacteriaceae/Pseudozobellia	0	0	0	0	0	0	0	0	0	0	0	0	0	0	0	0	0	0	0	0	0	0	0	0	0	0	0	0	0	0	0	0	0	0	0	0	0	0	0	0	0	0	0	0	0
Bacteria/Bacteroidetes/Bacteroidia/Flavobacteriales/Flavobacteriaceae/Psychroflexus	0	0	0	0	0	0	0	0	0	0	0	0	0	0	0	0	0	0	0	0	0	0	0	0	0	0	0	0	0	0	0	0	0	0	0	0	0	0	0	0	0	0	0	0	0
Bacteria/Bacteroidetes/Bacteroidia/Flavobacteriales/Flavobacteriaceae/Psychroserpens	0	0	0	0	0	0	0	0	0	0	0	0	0	0	0	0	0	0	0	0	0	0	0	0	0	0	0	0	0	0	0	0	0	0	0	0	0	0	0	0	0	0	0	0	0
Bacteria/Bacteroidetes/Bacteroidia/Flavobacteriales/Flavobacteriaceae/Robiginitalea	0	0	0	0	0	0	0	0	0	0	0	0	0	0	0	0	0	0	0	0	0	0	0	0	0	0	0	0	0	0	0	0	0	0	0	0	0	0	0	0	0	0	0	0	0
Bacteria/Bacteroidetes/Bacteroidia/Flavobacteriales/Flavobacteriaceae/Sabulilitoribacter	0	0	0	0	0	0	0	0	0	0	0	0	0	0	0	0	0	0	0	0	0	0	0	0	0	0	0	0	0	0	0	0	0	0	0	0	0	0	0	0	0	0	0	0	0
Bacteria/Bacteroidetes/Bacteroidia/Flavobacteriales/Flavobacteriaceae/Salegentibacter	0	0	0	0	0	0	0	0	0	0	0	0	0	0	0	0	0	0	0	0	0	0	0	0	0	0	0	0	0	0	0	0	0	0	0	0	0	0	0	0	0	0	0	0	0
Bacteria/Bacteroidetes/Bacteroidia/Flavobacteriales/Flavobacteriaceae/Salinimicrobium	0	0	0	0	0	0	0	0	0	0	0	0	0	0	0	0	0	0	0	0	0	0	0	0	0	0	0	0	0	0	0	0	0	0	0	0	0	0	0	0	0	0	0	0	0
Bacteria/Bacteroidetes/Bacteroidia/Flavobacteriales/Flavobacteriaceae/Sediminibacter	0	0	0	0	0	0	0	0	0	0	0	0	0	0	0	0	0	0	0	0	0	0	0	0	0	0	0	0	0	0	0	0	0	0	0	0	0	0	0	0	0	0	0	0	0
Bacteria/Bacteroidetes/Bacteroidia/Flavobacteriales/Flavobacteriaceae/Sediminicola	0	0	0	0	0	0	0	0	0	0	0	0	0	0	0	0	0	0	0	0	0	0	0	0	0	0	0	0	0	0	0	0	0	0	0	0	0	0	0	0	0	0	0	0	0
Bacteria/Bacteroidetes/Bacteroidia/Flavobacteriales/Flavobacteriaceae/Seonamhaeicola	0	0	0	0	0	0	0	0	0	0	0	0	0	0	0	0	0	0	0	0	0	0	0	0	0	0	0	0	0	0	0	0	0	0	0	0	0	0	0	0	0	0	0	0	0
Bacteria/Bacteroidetes/Bacteroidia/Flavobacteriales/Flavobacteriaceae/Siansivirga	0	0	0	0	0	0	0	0	0	0	0	0	0	0	0	0	0	0	0	0	0	0	0	0	0	0	0	0	0	0	0	0	0	0	0	0	0	0	0	0	0	0	0	0	0
Bacteria/Bacteroidetes/Bacteroidia/Flavobacteriales/Flavobacteriaceae/Sinomicrobium	0	0	0	0	0	0	0	0	0	0	0	0	0	0	0	0	0	0	0	0	0	0	0	0	0	0	0	0	0	0	0	0	0	0	0	0	0	0	0	0	0	0	0	0	0
Bacteria/Bacteroidetes/Bacteroidia/Flavobacteriales/Flavobacteriaceae/Snuella	0	0	0	0	0	0	0	0	0	0	0	0	0	0	0	0	0	0	0	0	0	0	0	0	0	0	0	0	0	0	0	0	0	0	0	0	0	0	0	0	0	0	0	0	0
Bacteria/Bacteroidetes/Bacteroidia/Flavobacteriales/Flavobacteriaceae/Spongiiferula	0	0	0	0	0	0	0	0	0	0	0	0	0	0	0	0	0	0	0	0	0	0	0	0	0	0	0	0	0	0	0	0	0	0	0	0	0	0	0	0	0	0	0	0	0
Bacteria/Bacteroidetes/Bacteroidia/Flavobacteriales/Flavobacteriaceae/Spongiimicrobium	0	0	0	0	0	0	0	0	0	0	0	0	0	0	0	0	0	0	0	0	0	0	0	0	0	0	0	0	0	0	0	0	0	0	0	0	0	0	0	0	0	0	0	0	0
Bacteria/Bacteroidetes/Bacteroidia/Flavobacteriales/Flavobacteriaceae/Spongiivirga	0	0	0	0	0	0	0	0	0	0	0	0	0	0	0	0	0	0	0	0	0	0	0	0	0	0	0	0	0	0	0	0	0	0	0	0	0	0	0	0	0	0	0	0	0
Bacteria/Bacteroidetes/Bacteroidia/Flavobacteriales/Flavobacteriaceae/Subsaxibacter	0	0	0	0	0	0	0	0	0	0	0	0	0	0	0	0	0	0	0	0	0	0	0	0	0	0	0	0	0	0	0	0	0	0	0	0	0	0	0	0	0	0	0	0	0
Bacteria/Bacteroidetes/Bacteroidia/Flavobacteriales/Flavobacteriaceae/Subsaximicrobium	0	0	0	0	0	0	0	0	0	0	0	0	0	0	0	0	0	0	0	0	0	0	0	0	0	0	0	0	0	0	0	0	0	0	0	0	0	0	0	0	0	0	0	0	0
Bacteria/Bacteroidetes/Bacteroidia/Flavobacteriales/Flavobacteriaceae/Sungkyunkwania	0	0	0	0	0	0	0	0	0	0	0	0	0	0	0	0	0	0	0	0	0	0	0	0	0	0	0	0	0	0	0	0	0	0	0	0	0	0	0	0	0	0	0	0	0
Bacteria/Bacteroidetes/Bacteroidia/Flavobacteriales/Flavobacteriaceae/Tamlana	0	0	0	0	0	0	0	0	0	0	0	0	0	0	0	0	0	0	0	0	0	0	0	0	0	0	0	0	0	0	0	0	0	0	0	0	0	0	0	0	0	0	0	0	0
Bacteria/Bacteroidetes/Bacteroidia/Flavobacteriales/Flavobacteriaceae/Tenacibaculum	0	0	0	0	0	0	0	0	0	0	0	0	0	0	0	0	0	0	0	0	0	0	0	0	0	0	0	0	0	0	0	0	0	0	0	0	0	0	0	0	0	0	0	0	0
Bacteria/Bacteroidetes/Bacteroidia/Flavobacteriales/Flavobacteriaceae/Ulvibacter	0	0	0	0	0	0	83	0	67	0	0	0	47	58	52	0	101	51	75	0	0	0	67	0	0	0	0	62	0	55	0	0	82	106	0	0	0	57	0	104	0	95	79	0	0
Bacteria/Bacteroidetes/Bacteroidia/Flavobacteriales/Flavobacteriaceae/uncultured	0	0	0	0	0	0	50	0	0	63	0	0	50	38	0	0	0	0	54	0	0	38	0	41	0	53	0	0	0	0	0	0	0	0	0	0	0	0	0	0	0	0	0	0	0
Bacteria/Bacteroidetes/Bacteroidia/Flavobacteriales/Flavobacteriaceae/Wenyingzhuangia	0	0	0	0	0	0	0	0	0	0	0	0	0	0	0	0	0	0	0	0	0	0	0	0	0	0	0	0	0	0	0	0	0	0	0	0	0	0	0	0	0	0	0	0	0
Bacteria/Bacteroidetes/Bacteroidia/Flavobacteriales/Flavobacteriaceae/Winogradskyella	0	0	0	0	0	0	0	0	0	0	0	0	0	0	0	0	0	0	0	0	0	0	0	0	0	0	0	0	0	0	0	0	0	0	0	0	0	0	0	0	0	0	0	0	0
Bacteria/Bacteroidetes/Bacteroidia/Flavobacteriales/Flavobacteriaceae/Vitellibacter	0	0	0	0	0	0	0	0	0	0	0	0	0	0	0	0	0	0	0	0	0	0	0	0	0	0	0	0	0	0	0	0	0	0	0	0	0	0	0	0	0	0	0	0	0
Bacteria/Bacteroidetes/Bacteroidia/Flavobacteriales/Flavobacteriaceae/Zeaxanthinibacter	0	0	0	0	0	0	0	0	0	0	0	0	0	0	0	0	0	0	0	0	0	0	0	0	0	0	0	0	0	0	0	0	0	0	0	0	0	0	0	0	0	0	0	0	0
Bacteria/Bacteroidetes/Bacteroidia/Flavobacteriales/Flavobacteriaceae/Zobellia	0	0	0	0	0	0	0	0	0	0	0	0	0	0	0	0	0	0	0	0	0	0	0	0	0	0	0	0	0	0	0	0	0	0	0	0	0	0	0	0	0	0	0	0	0
Bacteria/Bacteroidetes/Bacteroidia/Flavobacteriales/Flavobacteriaceae/Zunongwangia	0	0	0	0	0	0	0	0	0	0	0	0	0	0	0	0	0	0	0	0	0	0	0	0	0	0	0	0	0	0	0	0	0	0	0	0	0	0	0	0	0	0	0	0	0
Bacteria/Bacteroidetes/Bacteroidia/Flavobacteriales/Flavobacteriales Incertae Sedis/Ichthyobacterium	0	0	0	0	0	0	0	0	0	0	0	0	0	0	0	0	0	0	0	0	0	0	0	0	0	0	0	0	0	0	0	0	0	0	0	0	0	0	0	0	0	0	0	0	0
Bacteria/Bacteroidetes/Bacteroidia/Flavobacteriales/Schleiferiaceae/Schleiferia	0	0	0	0	0	0	0	0	0	0	0	0	0	0	0	0	0	0	0	0	0	0	0	0	0	0	0	0	0	0	0	0	0	0	0	0	0	0	0	0	0	0	0	0	0
Bacteria/Bacteroidetes/Bacteroidia/Flavobacteriales/Weeksellaceae/Algoriella	0	0	0	0	0	0	0	0	0	0	0	0	0	0	0	0	0	0	0	0	0	0	0	0	0	0	0	0	0	0	0	0	0	0	0	0	0	0	0	0	0	0	0	0	0
Bacteria/Bacteroidetes/Bacteroidia/Flavobacteriales/Weeksellaceae/Apibacter	0	0	0	0	0	0	0	0	0	0	0	0	0	0	0	0	0	0	0	0	0	0	0	0	0	0	0	0	0	0	0	0	0	0	0	0	0	0	0	0	0	0	0	0	0
Bacteria/Bacteroidetes/Bacteroidia/Flavobacteriales/Weeksellaceae/Bergeyella	31	0	18	0	0	0	22	0	0	20	0	0	36	27	17	0	0	0	0	0	21	17	0	19	0	22	0	0	0	18	0	0	0	0	0	20	0	0	0	0	0	0	0	0	0
Bacteria/Bacteroidetes/Bacteroidia/Flavobacteriales/Weeksellaceae/Chryseobacterium	0	0	0	0	0	0	0	0	0	0	0	0	0	0	0	0	0	0	0	0	0	0	0	0	0	0	0	0	0	0	0	0	0	0	0	0	0	0	0	0	0	0	0	0	0
Bacteria/Bacteroidetes/Bacteroidia/Flavobacteriales/Weeksellaceae/Cloacibacterium	0	0	0	0	0	0	0	0	0	0	0	0	0	0	0	0	0	0	0	0	0	0	0	0	0	0	0	0	0	0	0	0	0	0	0	0	0	0	0	0	0	0	0	0	0
Bacteria/Bacteroidetes/Bacteroidia/Flavobacteriales/Weeksellaceae/Cruoricaptor	0	0	0	0	0	0	0	0	0	0	0	0	0	0	0	0	0	0	0	0	0	0	0	0	0	0	0	0	0	0	0	0	0	0	0	0	0	0	0	0	0	0	0	0	0
Bacteria/Bacteroidetes/Bacteroidia/Flavobacteriales/Weeksellaceae/Elizabethkingia	0	0	0	0	0	0	0	0	0	0	0	0	0	0	0	0	0	0	0	0	0	0	0	0	0	0	0	0	0	0	0	0	0	0	0	0	0	0	0	0	0	0	0	0	0
Bacteria/Bacteroidetes/Bacteroidia/Flavobacteriales/Weeksellaceae/Moheibacter	0	0	0	0	0	0	0	0	0	0	0	0	0	0	0	0	0	0	0	0	0	0	0	0	0	0	0	0	0	0	0	0	0	0	0	0	0	0	0	0	0	0	0	0	0
Bacteria/Bacteroidetes/Bacteroidia/Flavobacteriales/Weeksellaceae/Ornithobacterium	0	0	0	0	0	0	0	0	0	0	0	0	0	0	0	0	0	0	0	0	0	0	0	0	0	0	0	0	0	0	0	0	0	0	0	0	0	0	0	0	0	0	0	0	0
Bacteria/Bacteroidetes/Bacteroidia/Flavobacteriales/Weeksellaceae/Riemerella	0	0	0	0	0	0	0	0	0	0	0	0	0	0	0	0	0	0	0	0	0	0	0	0	0	0	0	0	0	0	0	0	0	0	0	0	0	0	0	0	0	0	0	0	0
Bacteria/Bacteroidetes/Bacteroidia/Flavobacteriales/Weeksellaceae/Soonwooa	0	0	0	0	0	0	0	0	0	0	0	0	0	0	0	0	0	0	0	0	0	0	0	0	0	0	0	0	0	0	0	0	0	0	0	0	0	0	0	0	0	0	0	0	0
Bacteria/Bacteroidetes/Bacteroidia/Flavobacteriales/Weeksellaceae/uncultured	0	0	0	0	0	0	0	0	0	0	0	0	0	0	0	0	0	0	0	0	0	0	0	0	0	0	0	0	0	0	0	0	0	0	0	0	0	0	0	0	0	0	0	0	0
Bacteria/Bacteroidetes/Bacteroidia/Flavobacteriales/Weeksellaceae/Weeksella	0	0	0	0	0	0	0	0	0	0	0	0	0	0	0	0	0	0	0	0	0	0	0	0	0	0	0	0	0	0	0	0	0	0	0	0	0	0	0	0	0	0	0	0	0
Bacteria/Bacteroidetes/Bacteroidia/Sphingobacteriales/Lentimicrobiaceae/Lentimicrobium	0	0	0	0	0	0	0	0	0	0	0	0	0	0	0	0	0	0	0	0	0	0	0	0	0	0	0	0	0	0	0	0	0	0	0	0	0	0	0	0	0	0	0	0	0
Bacteria/Bacteroidetes/Bacteroidia/Sphingobacteriales/Sphingobacteriaceae/Arcticibacter	0	0	0	0	0	0	0	0	0	0	0	0	0	0	0	0	0	0	0	0	0	0	0	0	0	0	0	0	0	0	0	0	0	0	0	0	0	0	0	0	0	0	0	0	0
Bacteria/Bacteroidetes/Bacteroidia/Sphingobacteriales/Sphingobacteriaceae/Mucilaginibacter	0	0	0	0	0	0	0	0	0	0	0	0	0	0	0	0	0	0	0	0	0	0	0	0	0	0	0	0	0	0	0	0	0	0	0	0	0	0	0	0	0	0	0	0	0
Bacteria/Bacteroidetes/Bacteroidia/Sphingobacteriales/Sphingobacteriaceae/Nubsella	0	0	0	0	0	0	0	0	0	0	0	0	0	0	0	0	0	0	0	0	0	0	0	0	0	0	0	0	0	0	0	0	0	0	0	0	0	0	0	0	0	0	0	0	0
Bacteria/Bacteroidetes/Bacteroidia/Sphingobacteriales/Sphingobacteriaceae/Olivibacter	0	0	0	0	0	0	0	0	0	0	0	0	0	0	0	0	0	0	0	0	0	0	0	0	0	0	0	0	0	0	0	0	0	0	0	0	0	0	0	0	0	0	0	0	0
Bacteria/Bacteroidetes/Bacteroidia/Sphingobacteriales/Sphingobacteriaceae/Parapedobacter	0	0	0	0	0	0	0	0	0	0	0	0	0	0	0	0	0	0	0	0	0	0	0	0	0	0	0	0	0	0	0	0	0	0	0	0	0	0	0	0	0	0	0	0	0
Bacteria/Bacteroidetes/Bacteroidia/Sphingobacteriales/Sphingobacteriaceae/Pedobacter	0	0	0	0	0	0	0	0	0	0	0	0	0	0	0	0	0	0	0	0	0	0	0	0	0	0	0	0	0	0	0	0	0	0	0	0	0	0	0	0	0	0	0	0	0
Bacteria/Bacteroidetes/Bacteroidia/Sphingobacteriales/Sphingobacteriaceae/Pseudosphingobacterium	0	0	0	0	0	0	0	0	0	0	0	0	0	0	0	0	0	0	0	0	0	0	0	0	0	0	0	0	0	0	0	0	0	0	0	0	0	0	0	0	0	0	0	0	0
Bacteria/Bacteroidetes/Bacteroidia/Sphingobacteriales/Sphingobacteriaceae/Solitalea	0	0	0	0	0	0	0	0	0	0	0	0	0	0	0	0	0	0	0	0	0	0	0	0	0	0	0	0	0	0	0	0	0	0	0	0	0	0	0	0	0	0	0	0	0
Bacteria/Bacteroidetes/Bacteroidia/Sphingobacteriales/Sphingobacteriaceae/Sphingobacterium	0	0	0	0	0	0	0	0	0	0	0	0	0	0	0	0	0	0	0	0	0	0	0	0	0	0	0	0	0	0	0	0	0	0	0	0	0	0	0	0	0	0	0	0	0
Bacteria/Bacteroidetes/Bacteroidia/Sphingobacteriales/Sphingobacteriaceae/uncultured	0	0	0	0	0	0	0	0	0	0	0	0	0	0	0	0	0	0	0	0	0	0	0	0	0	0	0	0	0	0	0	0	0	0	0	0	0	0	0	0	0	0	0	0	0
Bacteria/Bacteroidetes/Chlorobia/Chlorobiales/Chlorobiaceae/Chlorobaculum	0	0	0	0	0	0	0	0	0	0	0	0	0	0	0	0	0	0	0	0	0	0	0	0	0	0	0	0	0	0	0	0	0	0	0	0	0	0	0	0	0	0	0	0	0
Bacteria/Bacteroidetes/Chlorobia/Chlorobiales/Chlorobiaceae/Chlorobium	0	0	0	0	0	0	0	0	0	0	0	0	0	0	0	0	0	0	0	0	0	0	0	0	0	0	0	0	0	0	0	0	0	0	0	0	0	0	0	0	0	0	0	0	0
Bacteria/Bacteroidetes/Chlorobia/Chlorobiales/Chloroherpetonaceae/Chloroherpeton	0	0	0	0	0	0	0	0	0	0	0	0	0	0	0	0	0	0	0	0	0	0	0	0	0	0	0	0	0	0	0	0	0	0	0	0	0	0	0	0	0	0	0	0	0
Bacteria/Bacteroidetes/Chlorobia/Chlorobiales/Chloroherpetonaceae/GBChlB	0	0	0	0	0	0	0	0	0	0	0	0	0	0	0	0	0	0	0	0	0	0	0	0	0	0	0	0	0	0	0	0	0	0	0	0	0	0	0	0	0	0	0	0	0
Bacteria/Bacteroidetes/Ignavibacteria/Ignavibacteriales/Ignavibacteriaceae/Ignavibacterium	293	196	113	92	101	162	201	120	124	148	161	161	151	159	153	93	84	31	177	188	190	145	205	190	165	255	194	177	117	174	123	88	99	259	177	249	155	212	155	83	104	106	175	169	176
Bacteria/Bacteroidetes/Ignavibacteria/Ignavibacteriales/Melioribacteraceae/IheB3-7	73	32	59	59	45	61	53	25	0	20	27	23	81	55	85	42	48	0	30	36	27	51	64	65	48	65	50	59	36	71	0	0	23	23	21	0	59	66	78	0	0	28	21	30	24
Bacteria/Bacteroidetes/Ignavibacteria/Ignavibacteriales/Melioribacteraceae/Melioribacter	0	0	0	0	0	0	0	0	0	0	0	0	0	0	0	0	0	0	0	0	0	0	0	0	0	0	0	0	0	0	0	0	0	0	0	0	0	0	0	0	0	0	0	0	0
Bacteria/Bacteroidetes/Ignavibacteria/Ignavibacteriales/Melioribacteraceae/ST-3K26	0	0	0	0	0	0	0	0	0	0	0	0	0	0	0	0	0	0	0	0	0	0	0	0	0	0	0	0	0	0	0	0	0	0	0	0	0	0	0	0	0	0	0	0	0
Bacteria/Bacteroidetes/Ignavibacteria/Kryptoniales/Kryptoniaceae/Candidatus Thermokryptus	0	0	0	0	0	0	0	0	0	0	0	0	0	0	0	0	0	0	0	0	0	0	0	0	0	0	0	0	0	0	0	0	0	0	0	0	0	0	0	0	0	0	0	0	0
Bacteria/Bacteroidetes/Rhodothermia/Balneolales/Balneolaceae/A815	0	0	0	0	0	0	0	0	0	0	0	0	0	0	0	0	0	0	0	0	0	0	0	0	0	0	0	0	0	0	0	0	0	0	0	0	0	0	0	0	0	0	0	0	0
Bacteria/Bacteroidetes/Rhodothermia/Balneolales/Balneolaceae/Aliifodinibius	0	0	0	0	0	0	0	0	0	0	0	0	0	0	0	0	0	0	0	0	0	0	0	0	0	0	0	0	0	0	0	0	0	0	0	0	0	0	0	0	0	0	0	0	0
Bacteria/Bacteroidetes/Rhodothermia/Balneolales/Balneolaceae/Balneola	0	0	0	0	0	0	0	0	0	0	0	0	0	0	0	0	0	0	0	0	0	0	0	0	0	0	0	0	0	0	0	0	0	0	0	0	0	0	0	0	0	0	0	0	0
Bacteria/Bacteroidetes/Rhodothermia/Balneolales/Balneolaceae/CK06-06-Mud-MAS4B-21	0	0	0	0	0	0	0	0	0	0	0	0	0	0	0	0	0	0	0	0	0	0	0	0	0	0	0	0	0	0	0	0	0	0	0	0	0	0	0	0	0	0	0	0	0
Bacteria/Bacteroidetes/Rhodothermia/Balneolales/Balneolaceae/F1-37X2	0	0	0	0	0	0	0	0	0	0	0	0	0	0	0	0	0	0	0	0	0	0	0	0	0	0	0	0	0	0	0	0	0	0	0	0	0	0	0	0	0	0	0	0	0
Bacteria/Bacteroidetes/Rhodothermia/Balneolales/Balneolaceae/Gracilimonas	0	0	0	0	0	0	0	0	0	0	0	0	0	0	0	0	0	0	0	0	0	0	0	0	0	0	0	0	0	0	0	0	0	0	0	0	0	0	0	0	0	0	0	0	0
Bacteria/Bacteroidetes/Rhodothermia/Balneolales/Balneolaceae/MAT-CR-P4-C12	0	0	0	0	0	0	0	0	0	0	0	0	0	0	0	0	0	0	0	0	0	0	0	0	0	0	0	0	0	0	0	0	0	0	0	0	0	0	0	0	0	0	0	0	0
Bacteria/Bacteroidetes/Rhodothermia/Balneolales/Balneolaceae/Rhodohalobacter	0	0	0	0	0	0	0	0	0	0	0	0	0	0	0	0	0	0	0	0	0	0	0	0	0	0	0	0	0	0	0	0	0	0	0	0	0	0	0	0	0	0	0	0	0
Bacteria/Bacteroidetes/Rhodothermia/Balneolales/Balneolaceae/Soortia	0	0	0	0	0	0	0	0	0	0	0	0	0	0	0	0	0	0	0	0	0	0	0	0	0	0	0	0	0	0	0	0	0	0	0	0	0	0	0	0	0	0	0	0	0
Bacteria/Bacteroidetes/Rhodothermia/Balneolales/Balneolaceae/uncultured	0	0	0	0	0	0	0	0	0	0	0	0	0	0	0	0	0	0	0	0	0	0	0	0	0	0	0	0	0	0	0	0	0	0	0	0	0	0	0	0	0	0	0	0	0
Bacteria/Bacteroidetes/Rhodothermia/Rhodothermales/Rhodothermaceae/Longimonas	0	0	0	0	0	0	0	0	0	0	0	0	0	0	0	0	0	0	0	0	0	0	0	0	0	0	0	0	0	0	0	0	0	0	0	0	0	0	0	0	0	0	0	0	0
Bacteria/Bacteroidetes/Rhodothermia/Rhodothermales/Rhodothermaceae/RA	0	0	0	0	0	0	0	0	0	0	0	0	0	0	0	0	0	0	0	0	0	0	0	0	0	0	0	0	0	0	0	0	0	0	0	0	0	0	0	0	0	0	0	0	0
Bacteria/Bacteroidetes/Rhodothermia/Rhodothermales/Rhodothermaceae/Rhodothermus	0	0	0	0	0	0	0	0	0	0	0	0	0	0	0	0	0	0	0	0	0	0	0	0	0	0	0	0	0	0	0	0	0	0	0	0	0	0	0	0	0	0	0	0	0
Bacteria/Bacteroidetes/Rhodothermia/Rhodothermales/Rhodothermaceae/Rubricoccus	0	0	0	0	0	0	0	0	0	0	0	0	0	0	0	0	0	0	0	0	0	0	0	0	0	0	0	0	0	0	0	0	0	0	0	0	0	0	0	0	0	0	0	0	0
Bacteria/Bacteroidetes/Rhodothermia/Rhodothermales/Rhodothermaceae/Rubrivirga	0	0	0	0	0	0	0	0	0	0	0	0	0	0	0	0	0	0	0	0	0	0	0	0	0	0	0	0	0	0	0	0	0	0	0	0	0	0	0	0	0	0	0	0	0
Bacteria/Bacteroidetes/Rhodothermia/Rhodothermales/Rhodothermaceae/Salinibacter	0	0	0	0	0	0	0	0	0	0	0	0	0	0	0	0	0	0	0	0	0	0	0	0	0	0	0	0	0	0	0	0	0	0	0	0	0	0	0	0	0	0	0	0	0
Bacteria/Bacteroidetes/Rhodothermia/Rhodothermales/Rhodothermaceae/Salisaeta	0	0	0	0	0	0	0	0	0	0	0	0	0	0	0	0	0	0	0	0	0	0	0	0	0	0	0	0	0	0	0	0	0	0	0	0	0	0	0	0	0	0	0	0	0
Bacteria/Bacteroidetes/Rhodothermia/Rhodothermales/Rhodothermaceae/uncultured	32	0	0	0	0	31	33	56	0	0	0	0	35	26	24	43	60	36	0	40	0	23	37	23	0	33	18	32	0	46	33	36	32	45	27	20	37	35	30	80	35	73	0	39	52
Bacteria/Caldiserica/Caldisericia/Caldisericales/Caldisericaceae/Caldisericum	0	0	0	0	0	0	0	0	0	0	0	0	0	0	0	0	0	0	0	0	0	0	0	0	0	0	0	0	0	0	0	0	0	0	0	0	0	0	0	0	0	0	0	0	0
Bacteria/Calditrichaeota/Calditrichia/Calditrichales/Calditrichaceae/Caldithrix	156	67	55	0	0	0	0	0	0	0	0	0	0	0	0	0	0	0	129	0	0	0	0	0	0	0	0	0	0	69	0	0	48	0	0	0	0	0	88	0	0	75	0	0	0
Bacteria/Calditrichaeota/Calditrichia/Calditrichales/Calditrichaceae/Calorithrix	0	0	0	0	0	0	0	0	0	0	0	0	0	0	0	0	0	0	0	0	0	0	0	0	0	0	0	0	0	0	0	0	0	122	99	115	0	0	0	0	0	0	0	0	0
Bacteria/Calditrichaeota/Calditrichia/Calditrichales/Calditrichaceae/JdFR-76	0	0	0	0	0	0	0	0	0	0	0	0	0	0	0	0	0	0	0	0	0	0	0	0	0	0	0	0	0	0	0	0	0	0	0	0	0	0	0	0	0	0	0	0	0
Bacteria/Calditrichaeota/Calditrichia/Calditrichales/Calditrichaceae/SM23-31	0	0	0	0	0	0	0	0	0	0	0	0	0	0	0	0	0	0	0	0	0	0	0	0	0	0	0	0	0	0	0	0	0	0	0	0	0	0	0	0	0	0	0	0	0
Bacteria/Chlamydiae/Chlamydiae/Chlamydiales/Chlamydiaceae/Candidatus Amphibiichlamydia	0	0	0	0	0	0	0	0	0	0	0	0	0	0	0	0	0	0	0	0	0	0	0	0	0	0	0	0	0	0	0	0	0	0	0	0	0	0	0	0	0	0	0	0	0
Bacteria/Chlamydiae/Chlamydiae/Chlamydiales/Chlamydiaceae/Candidatus Clavichlamydia	0	0	0	0	0	0	0	0	0	0	0	0	0	0	0	0	0	0	0	0	0	0	0	0	0	0	0	0	0	0	0	0	0	0	0	0	0	0	0	0	0	0	0	0	0
Bacteria/Chlamydiae/Chlamydiae/Chlamydiales/Chlamydiaceae/Chlamydia	0	0	0	0	0	0	0	0	0	0	0	0	0	0	0	0	0	0	0	0	0	0	0	0	0	0	0	0	0	0	0	0	0	0	0	0	0	0	0	0	0	0	0	0	0
Bacteria/Chlamydiae/Chlamydiae/Chlamydiales/Chlamydiaceae/uncultured	0	0	0	0	0	0	0	0	0	0	0	0	0	0	0	0	0	0	0	0	0	0	0	0	0	0	0	0	0	0	0	0	0	0	0	0	0	0	0	0	0	0	0	0	0
Bacteria/Chlamydiae/Chlamydiae/Chlamydiales/Chlamydiales Incertae Sedis/Candidatus Piscichlamydia	0	0	0	0	0	0	0	0	0	0	0	0	0	0	0	0	0	0	0	0	0	0	0	0	0	0	0	0	0	0	0	0	0	0	0	0	0	0	0	0	0	0	0	0	0
Bacteria/Chlamydiae/Chlamydiae/Chlamydiales/Chlamydiales Incertae Sedis/Candidatus Similichlamydia	0	0	0	0	0	0	0	0	0	0	0	0	0	0	0	0	0	0	0	0	0	0	0	0	0	0	0	0	0	0	0	0	0	0	0	0	0	0	0	0	0	0	0	0	0
Bacteria/Chlamydiae/Chlamydiae/Chlamydiales/Criblamydiaceae/Criblamydia	0	0	0	0	0	0	0	0	0	0	0	0	0	0	0	0	0	0	0	0	0	0	0	0	0	0	0	0	0	0	0	0	0	0	0	0	0	0	0	0	0	0	0	0	0
Bacteria/Chlamydiae/Chlamydiae/Chlamydiales/Criblamydiaceae/Estrella	0	0	0	0	0	0	0	0	0	0	0	0	0	0	0	0	0	0	0	0	0	0	0	0	0	0	0	0	0	0	0	0	0	0	0	0	0	0	0	0	0	0	0	0	0
Bacteria/Chlamydiae/Chlamydiae/Chlamydiales/Criblamydiaceae/uncultured	0	0	0	0	0	0	0	0	0	0	0	0	0	0	0	0	0	0	0	0	0	0	0	0	0	0	0	0	0	0	0	0	0	0	0	0	0	0	0	0	0	0	0	0	0
Bacteria/Chlamydiae/Chlamydiae/Chlamydiales/Parachlamydiaceae/Candidatus Mesochlamydia	0	0	0	0	0	0	0	0	0	0	0	0	0	0	0	0	0	0	0	0	0	0	0	0	0	0	0	0	0	0	0	0	0	0	0	0	0	0	0	0	0	0	0	0	0
Bacteria/Chlamydiae/Chlamydiae/Chlamydiales/Parachlamydiaceae/Candidatus Metachlamydia	0	0	0	0	0	0	0	0	0	0	0	0	0	0	0	0	0	0	0	0	0	0	0	0	0	0	0	0	0	0	0	0	0	0	0	0	0	0	0	0	0	0	0	0	0
Bacteria/Chlamydiae/Chlamydiae/Chlamydiales/Parachlamydiaceae/Candidatus Protochlamydia	0	0	0	0	0	0	0	0	0	0	0	0	0	0	0	0	0	0	0	0	0	0	0	0	0	0	0	0	0	0	0	0	0	0	0	0	0	0	0	0	0	0	0	0	0
Bacteria/Chlamydiae/Chlamydiae/Chlamydiales/Parachlamydiaceae/Candidatus Rubidus	0	0	0	0	0	0	0	0	0	0	0	0	0	0	0	0	0	0	0	0	0	0	0	0	0	0	0	0	0	0	0	0	0	0	0	0	0	0	0	0	0	0	0	0	0
Bacteria/Chlamydiae/Chlamydiae/Chlamydiales/Parachlamydiaceae/Neochlamydia	0	0	0	0	0	0	0	0	0	0	0	0	0	0	0	0	0	0	0	0	0	0	0	0	0	0	0	0	0	0	0	0	0	0	0	0	0	0	0	0	0	0	0	0	0
Bacteria/Chlamydiae/Chlamydiae/Chlamydiales/Parachlamydiaceae/Parachlamydia	0	0	0	0	0	0	0	0	0	0	0	0	0	0	0	0	0	0	0	0	0	0	0	0	0	0	0	0	0	0	0	0	0	0	0	0	0	0	0	0	0	0	0	0	0
Bacteria/Chlamydiae/Chlamydiae/Chlamydiales/Parachlamydiaceae/uncultured	0	0	0	0	0	0	0	0	0	0	0	0	0	0	0	0	0	0	0	0	0	0	0	0	0	0	0	0	0	0	0	0	0	0	0	0	0	0	0	0	0	0	0	0	0
Bacteria/Chlamydiae/Chlamydiae/Chlamydiales/Simkaniaceae/Candidatus Fritschea	0	0	0	0	0	0	0	0	0	0	0	0	0	0	0	0	0	0	0	0	0	0	0	0	0	0	0	0	0	0	0	0	0	0	0	0	0	0	0	0	0	0	0	0	0
Bacteria/Chlamydiae/Chlamydiae/Chlamydiales/Simkaniaceae/Candidatus Renichlamydia	0	0	0	0	0	0	0	0	0	0	0	0	0	0	0	0	0	0	0	0	0	0	0	0	0	0	0	0	0	0	0	0	0	0	0	0	0	0	0	0	0	0	0	0	0
Bacteria/Chlamydiae/Chlamydiae/Chlamydiales/Simkaniaceae/Candidatus Rhabdochlamydia	0	0	0	0	0	0	0	0	0	0	0	0	0	0	0	0	0	0	0	0	0	0	0	0	0	0	0	0	0	0	0	0	0	0	0	0	0	0	0	0	0	0	0	0	0
Bacteria/Chlamydiae/Chlamydiae/Chlamydiales/Simkaniaceae/Ga0074140	0	0	0	0	0	0	0	0	0	0	0	0	0	0	0	0	0	0	0	0	0	0	0	0	0	0	0	0	0	0	0	0	0	0	0	0	0	0	0	0	0	0	0	0	0
Bacteria/Chlamydiae/Chlamydiae/Chlamydiales/Simkaniaceae/Simkania	0	0	0	0	0	0	0	0	0	0	0	0	0	0	0	0	0	0	0	0	0	0	0	0	0	0	0	0	0	0	0	0	0	0	0	0	0	0	0	0	0	0	0	0	0
Bacteria/Chlamydiae/Chlamydiae/Chlamydiales/Simkaniaceae/uncultured	0	0	0	0	0	0	0	0	0	0	0	0	0	0	0	0	0	0	0	15	0	0	0	0	0	0	0	0	0	13	0	0	0	0	0	0	0	0	0	0	0	0	0	0	0
Bacteria/Chlamydiae/Chlamydiae/Chlamydiales/Waddliaceae/Waddlia	0	0	0	0	0	0	0	0	0	0	0	0	0	0	0	0	0	0	0	0	0	0	0	0	0	0	0	0	0	0	0	0	0	0	0	0	0	0	0	0	0	0	0	0	0
Bacteria/Chloroflexi/Anaerolineae/Anaerolineales/Anaerolineaceae/ADurb.Bin120	0	0	0	0	0	0	0	0	0	0	0	0	0	0	0	0	0	0	0	0	0	0	0	0	0	0	0	0	0	0	0	0	0	0	0	0	0	0	0	0	0	0	0	0	0
Bacteria/Chloroflexi/Anaerolineae/Anaerolineales/Anaerolineaceae/Anaerolinea	0	0	0	0	0	0	0	0	0	0	0	0	0	0	0	0	0	0	0	0	0	0	0	0	0	0	0	0	0	0	0	0	0	0	0	0	0	0	0	0	0	0	0	0	0
Bacteria/Chloroflexi/Anaerolineae/Anaerolineales/Anaerolineaceae/Anaerolineaceae UCG-001	0	0	0	0	0	0	0	0	0	0	0	0	0	0	0	0	0	0	0	0	0	0	0	0	0	0	0	0	0	0	0	0	0	0	0	0	0	0	0	0	0	0	0	0	0
Bacteria/Chloroflexi/Anaerolineae/Anaerolineales/Anaerolineaceae/Bellilinea	0	0	0	0	0	0	0	0	0	0	0	0	0	0	0	0	0	0	0	0	0	0	0	0	0	0	0	0	0	0	0	0	0	0	0	0	0	0	0	0	0	0	0	0	0
Bacteria/Chloroflexi/Anaerolineae/Anaerolineales/Anaerolineaceae/Flexilinea	0	0	0	0	0	0	0	0	0	0	0	0	0	0	0	0	0	0	0	0	0	0	0	0	0	0	0	0	0	0	0	0	0	0	0	0	0	0	0	0	0	0	0	0	0
Bacteria/Chloroflexi/Anaerolineae/Anaerolineales/Anaerolineaceae/GWD2-49-16	38	31	0	0	0	0	0	0	0	0	0	0	0	0	0	0	0	0	0	0	0	24	35	22	25	0	27	0	16	22	0	0	0	0	0	0	21	29	29	0	0	0	0	0	0
Bacteria/Chloroflexi/Anaerolineae/Anaerolineales/Anaerolineaceae/Leptolinea	84	0	0	0	0	0	0	0	0	0	0	0	0	0	0	0	0	0	0	0	0	0	59	0	0	94	61	0	0	0	0	0	0	57	0	51	0	0	0	0	0	0	0	66	55
Bacteria/Chloroflexi/Anaerolineae/Anaerolineales/Anaerolineaceae/Levilinea	0	0	0	0	0	0	0	0	0	0	0	0	0	0	0	0	0	0	0	0	0	0	0	0	0	0	0	0	0	0	0	0	0	0	0	0	0	0	0	0	0	0	0	0	0
Bacteria/Chloroflexi/Anaerolineae/Anaerolineales/Anaerolineaceae/Longilinea	0	0	0	0	0	0	0	0	0	0	0	0	0	0	0	0	0	0	0	0	0	0	0	0	0	0	0	0	0	0	0	0	0	0	0	0	0	0	0	0	0	0	0	0	0
Bacteria/Chloroflexi/Anaerolineae/Anaerolineales/Anaerolineaceae/Ornatilinea	0	0	0	0	0	0	0	0	0	0	0	0	0	0	0	0	0	0	0	0	0	0	0	0	0	0	0	0	0	0	0	0	0	0	0	0	0	0	0	0	0	0	0	0	0
Bacteria/Chloroflexi/Anaerolineae/Anaerolineales/Anaerolineaceae/Pelolinea	0	0	0	0	0	0	0	0	0	0	0	0	0	0	0	0	0	0	0	0	0	0	0	0	0	0	0	0	0	0	0	0	0	0	0	0	0	0	0	0	0	0	0	0	0
Bacteria/Chloroflexi/Anaerolineae/Anaerolineales/Anaerolineaceae/RBG-16-58-14	0	0	0	0	0	0	0	0	0	0	0	0	0	0	0	0	0	0	0	0	0	0	0	0	0	0	0	0	0	0	0	0	0	0	0	0	0	0	0	0	0	0	0	0	0
Bacteria/Chloroflexi/Anaerolineae/Anaerolineales/Anaerolineaceae/Thermanaerothrix	0	0	0	0	0	0	0	0	0	0	0	0	0	0	0	0	0	0	0	0	0	0	0	0	0	0	0	0	0	0	0	0	0	0	0	0	0	0	0	0	0	0	0	0	0
Bacteria/Chloroflexi/Anaerolineae/Anaerolineales/Anaerolineaceae/Thermomarinilinea	21	0	0	0	0	0	0	0	0	0	0	0	0	0	0	0	0	0	0	0	0	0	0	0	0	0	0	0	0	0	0	0	0	0	0	0	0	0	0	0	0	0	0	0	0
Bacteria/Chloroflexi/Anaerolineae/Anaerolineales/Anaerolineaceae/uncultured	860	537	438	394	265	394	1417	771	1078	907	867	820	555	617	653	673	854	492	927	1135	1130	384	556	494	583	690	570	861	489	609	802	704	713	1632	1231	1419	730	664	625	616	832	771	1504	1416	1518
Bacteria/Chloroflexi/Anaerolineae/Anaerolineales/Anaerolineaceae/UTCFX1	0	0	0	0	0	0	0	0	0	0	0	0	0	0	0	0	0	0	0	0	0	0	0	0	0	0	0	0	0	0	0	0	0	0	0	0	0	0	0	0	0	0	0	0	0
Bacteria/Chloroflexi/Anaerolineae/Ardenticatenales/Ardenticatenaceae/Ardenticatena	0	0	0	0	0	0	0	0	0	0	0	0	0	0	0	0	0	0	0	0	0	0	0	0	0	0	0	0	0	0	0	0	0	0	0	0	0	0	0	0	0	0	0	0	0
Bacteria/Chloroflexi/Anaerolineae/Ardenticatenales/Ardenticatenaceae/uncultured	0	0	0	0	0	0	0	0	0	0	0	0	0	0	0	0	0	0	0	0	0	0	0	0	0	0	0	0	0	0	0	0	0	0	0	0	0	0	0	0	0	0	0	0	0
Bacteria/Chloroflexi/Anaerolineae/Caldilineales/Caldilineaceae/Caldilinea	0	0	0	0	0	0	0	0	0	0	0	0	0	0	0	0	0	0	0	0	0	0	0	0	0	0	0	0	0	0	0	0	0	0	0	0	0	0	0	0	0	0	0	0	0
Bacteria/Chloroflexi/Anaerolineae/Caldilineales/Caldilineaceae/Litorilinea	0	0	0	0	0	0	0	0	0	0	0	0	0	0	0	0	0	0	0	0	0	0	0	0	0	0	0	0	0	0	0	0	0	0	0	0	0	0	0	0	0	0	0	0	0
Bacteria/Chloroflexi/Anaerolineae/Caldilineales/Caldilineaceae/uncultured	35	0	0	23	0	19	71	35	44	0	37	21	23	31	30	45	42	0	30	52	45	25	35	48	36	46	38	52	22	36	33	47	51	66	35	93	35	47	39	45	44	37	65	34	58
Bacteria/Chloroflexi/Anaerolineae/SBR1031/A4b/OLB13	0	0	0	0	0	0	0	0	0	0	0	0	0	0	0	0	0	0	0	0	0	0	0	0	0	0	0	0	0	0	0	0	0	0	0	0	0	0	0	0	0	0	0	0	0
Bacteria/Chloroflexi/Anaerolineae/SBR1031/A4b/OLB15	0	0	0	0	0	0	0	0	0	0	0	0	0	0	0	0	0	0	0	0	0	0	0	0	0	0	0	0	0	0	0	0	0	0	0	0	0	0	0	0	0	0	0	0	0
Bacteria/Chloroflexi/Anaerolineae/Thermoflexales/Thermoflexaceae/Thermoflexus	0	0	0	0	0	0	0	0	0	0	0	0	0	0	0	0	0	0	0	0	0	0	0	0	0	0	0	0	0	0	0	0	0	0	0	0	0	0	0	0	0	0	0	0	0
Bacteria/Chloroflexi/Chloroflexia/Chloroflexales/Chloroflexaceae/Candidatus Chlorothrix	0	0	0	0	0	0	0	0	0	0	0	0	0	0	0	0	0	0	0	0	0	0	0	0	0	0	0	0	0	0	0	0	0	0	0	0	0	0	0	0	0	0	0	0	0
Bacteria/Chloroflexi/Chloroflexia/Chloroflexales/Chloroflexaceae/Chloroflexus	0	0	0	0	0	0	0	0	0	0	0	0	0	0	0	0	0	0	0	0	0	0	0	0	0	0	0	0	0	0	0	0	0	0	0	0	0	0	0	0	0	0	0	0	0
Bacteria/Chloroflexi/Chloroflexia/Chloroflexales/Chloroflexaceae/FFCH7168	0	0	0	0	0	0	0	0	0	0	0	0	0	0	0	0	0	0	0	0	0	0	0	0	0	0	0	0	0	0	0	0	0	0	0	0	0	0	0	0	0	0	0	0	0
Bacteria/Chloroflexi/Chloroflexia/Chloroflexales/Chloroflexaceae/Oscillochloris	0	0	0	0	0	0	0	0	0	0	0	0	0	0	0	0	0	0	0	0	0	0	0	0	0	0	0	0	0	0	0	0	0	0	0	0	0	0	0	0	0	0	0	0	0
Bacteria/Chloroflexi/Chloroflexia/Chloroflexales/Herpetosiphonaceae/Herpetosiphon	0	0	0	0	0	0	0	0	0	0	0	0	0	0	0	0	0	0	0	0	0	0	0	0	0	0	0	0	0	0	0	0	0	0	0	0	0	0	0	0	0	0	0	0	0
Bacteria/Chloroflexi/Chloroflexia/Chloroflexales/Roseiflexaceae/Roseiflexus	0	0	0	0	0	0	0	0	0	0	0	0	0	0	0	0	0	0	0	0	0	0	0	0	0	0	0	0	0	0	0	0	0	0	0	0	0	0	0	0	0	0	0	0	0
Bacteria/Chloroflexi/Chloroflexia/Chloroflexales/Roseiflexaceae/uncultured	0	0	0	0	0	0	0	0	0	0	0	0	0	0	0	0	0	0	0	0	0	0	0	0	0	0	0	0	0	0	0	0	0	0	0	0	0	0	0	0	0	0	0	0	0
Bacteria/Chloroflexi/Chloroflexia/Kallotenuales/Kallotenuaceae/Kallotenue	0	0	0	0	0	0	0	0	0	0	0	0	0	0	0	0	0	0	0	0	0	0	0	0	0	0	0	0	0	0	0	0	0	0	0	0	0	0	0	0	0	0	0	0	0
Bacteria/Chloroflexi/Chloroflexia/Thermobaculales/Thermobaculaceae/Thermobaculum	0	0	0	0	0	0	0	0	0	0	0	0	0	0	0	0	0	0	0	0	0	0	0	0	0	0	0	0	0	0	0	0	0	0	0	0	0	0	0	0	0	0	0	0	0
Bacteria/Chloroflexi/Chloroflexia/Thermomicrobiales/Thermomicrobiaceae/Nitrolancea	0	0	0	0	0	0	0	0	0	0	0	0	0	0	0	0	0	0	0	0	0	0	0	0	0	0	0	0	0	0	0	0	0	0	0	0	0	0	0	0	0	0	0	0	0
Bacteria/Chloroflexi/Chloroflexia/Thermomicrobiales/Thermomicrobiaceae/Thermorudis	0	0	0	0	0	0	0	0	0	0	0	0	0	0	0	0	0	0	0	0	0	0	0	0	0	0	0	0	0	0	0	0	0	0	0	0	0	0	0	0	0	0	0	0	0
Bacteria/Chloroflexi/Dehalococcoidia/Dehalococcoidales/Dehalococcoidaceae/Dehalococcoides	0	0	0	0	0	0	0	0	0	0	0	0	0	0	0	0	0	0	0	0	0	0	0	0	0	0	0	0	0	0	0	0	0	0	0	0	0	0	0	0	0	0	0	0	0
Bacteria/Chloroflexi/Dehalococcoidia/Dehalococcoidales/Dehalococcoidaceae/Dehalogenimonas	25	0	0	0	0	0	31	0	0	0	0	0	18	0	22	0	0	0	0	0	0	0	0	0	0	0	13	25	0	25	0	0	0	0	0	0	24	20	0	0	0	23	0	0	0
Bacteria/Chloroflexi/Dehalococcoidia/Dehalococcoidales/Dehalococcoidales Incertae Sedis/Dehalobium	0	0	0	0	0	0	0	0	0	0	0	0	0	0	0	0	0	0	0	0	0	0	0	0	0	0	0	0	0	0	0	0	0	0	0	0	0	0	0	0	0	0	0	0	0
Bacteria/Chloroflexi/Dehalococcoidia/GIF9/AB-539-J10/Dsc1	0	0	0	0	0	0	0	0	0	0	0	0	0	0	0	0	0	0	0	0	0	0	0	0	0	0	0	0	0	0	0	0	0	0	0	0	0	0	0	0	0	0	0	0	0
Bacteria/Chloroflexi/Dehalococcoidia/GIF9/AB-539-J10/SCGC-AB-539-J10	0	0	0	0	0	0	0	0	0	0	0	0	0	0	0	0	0	0	0	0	0	0	0	0	0	0	0	0	0	0	0	0	0	0	0	0	0	0	0	0	0	0	31	0	0
Bacteria/Chloroflexi/Ktedonobacteria/Ktedonobacterales/Ktedonobacteraceae/1921-2	0	0	0	0	0	0	0	0	0	0	0	0	0	0	0	0	0	0	0	0	0	0	0	0	0	0	0	0	0	0	0	0	0	0	0	0	0	0	0	0	0	0	0	0	0
Bacteria/Chloroflexi/Ktedonobacteria/Ktedonobacterales/Ktedonobacteraceae/1921-3	0	0	0	0	0	0	0	0	0	0	0	0	0	0	0	0	0	0	0	0	0	0	0	0	0	0	0	0	0	0	0	0	0	0	0	0	0	0	0	0	0	0	0	0	0
Bacteria/Chloroflexi/Ktedonobacteria/Ktedonobacterales/Ktedonobacteraceae/1959-1	0	0	0	0	0	0	0	0	0	0	0	0	0	0	0	0	0	0	0	0	0	0	0	0	0	0	0	0	0	0	0	0	0	0	0	0	0	0	0	0	0	0	0	0	0
Bacteria/Chloroflexi/Ktedonobacteria/Ktedonobacterales/Ktedonobacteraceae/FCPS473	0	0	0	0	0	0	0	0	0	0	0	0	0	0	0	0	0	0	0	0	0	0	0	0	0	0	0	0	0	0	0	0	0	0	0	0	0	0	0	0	0	0	0	0	0
Bacteria/Chloroflexi/Ktedonobacteria/Ktedonobacterales/Ktedonobacteraceae/G12-WMSP1	0	0	0	0	0	0	0	0	0	0	0	0	0	0	0	0	0	0	0	0	0	0	0	0	0	0	0	0	0	0	0	0	0	0	0	0	0	0	0	0	0	0	0	0	0
Bacteria/Chloroflexi/Ktedonobacteria/Ktedonobacterales/Ktedonobacteraceae/HSB OF53-F07	0	0	0	0	0	0	0	0	0	0	0	0	0	0	0	0	0	0	0	0	0	0	0	0	0	0	0	0	0	0	0	0	0	0	0	0	0	0	0	0	0	0	0	0	0
Bacteria/Chloroflexi/Ktedonobacteria/Ktedonobacterales/Ktedonobacteraceae/JG30a-KF-32	0	0	0	0	0	0	0	0	0	0	0	0	0	0	0	0	0	0	0	0	0	0	0	0	0	0	0	0	0	0	0	0	0	0	0	0	0	0	0	0	0	0	0	0	0
Bacteria/Chloroflexi/Ktedonobacteria/Ktedonobacterales/Ktedonobacteraceae/Ktedonobacter	0	0	0	0	0	0	0	0	0	0	0	0	0	0	0	0	0	0	0	0	0	0	0	0	0	0	0	0	0	0	0	0	0	0	0	0	0	0	0	0	0	0	0	0	0
Bacteria/Chloroflexi/Ktedonobacteria/Ktedonobacterales/Ktedonobacteraceae/Thermosporothrix	0	0	0	0	0	0	0	0	0	0	0	0	0	0	0	0	0	0	0	0	0	0	0	0	0	0	0	0	0	0	0	0	0	0	0	0	0	0	0	0	0	0	0	0	0
Bacteria/Chloroflexi/Ktedonobacteria/Ktedonobacterales/Ktedonobacteraceae/uncultured	0	0	0	0	0	0	0	0	0	0	0	0	0	0	0	0	0	0	0	0	0	0	0	0	0	0	0	0	0	0	0	0	0	0	0	0	0	0	0	0	0	0	0	0	0
Bacteria/Chrysiogenetes/Chrysiogenetes/Chrysiogenales/Chrysiogenaceae/Desulfurispirillum	0	0	0	0	0	0	0	0	0	0	0	0	0	0	0	0	0	0	0	0	0	0	0	0	0	0	0	0	0	0	0	0	0	0	0	0	0	0	0	0	0	0	0	0	0
Bacteria/Cloacimonetes/Cloacimonadia/Cloacimonadales/Cloacimonadaceae/Candidatus Cloacimonas	0	0	0	0	0	0	0	0	0	0	0	0	0	0	0	0	0	0	0	0	0	0	0	0	0	0	0	0	0	0	0	0	0	0	0	0	0	0	0	0	0	0	0	0	0
Bacteria/Cloacimonetes/Cloacimonadia/Cloacimonadales/Cloacimonadaceae/LNR A2-18	0	0	0	0	0	0	0	0	0	0	0	0	0	0	0	0	0	0	0	0	0	0	0	0	0	0	0	0	0	0	0	0	0	0	0	0	0	0	0	0	0	0	0	0	0
Bacteria/Cloacimonetes/Cloacimonadia/Cloacimonadales/Cloacimonadaceae/W5	0	0	0	0	0	0	0	0	0	0	0	0	0	0	0	0	0	0	0	0	0	0	0	0	0	0	0	0	0	0	0	0	0	0	0	0	0	0	0	0	0	0	0	0	0
Bacteria/Coprothermobacteraeota/Coprothermobacteria/Coprothermobacterales/Coprothermobacteraceae/Coprothermobacter	0	0	0	0	0	0	0	0	0	0	0	0	0	0	0	0	0	0	0	0	0	0	0	0	0	0	0	0	0	0	0	0	0	0	0	0	0	0	0	0	0	0	0	0	0
Bacteria/Cyanobacteria/Oxyphotobacteria/Eurycoccales/Eurycoccales Incertae Sedis/Candidatus Gloeomargarita	0	0	0	0	0	0	0	0	0	0	0	0	0	0	0	0	0	0	0	0	0	0	0	0	0	0	0	0	0	0	0	0	0	0	0	0	0	0	0	0	0	0	0	0	0
Bacteria/Cyanobacteria/Oxyphotobacteria/Eurycoccales/Eurycoccales Incertae Sedis/Synechococcus PCC-7336	0	0	0	0	0	0	0	0	0	0	0	0	0	0	0	0	0	0	0	0	0	0	0	0	0	0	0	0	0	0	0	0	0	0	0	0	0	0	0	0	0	0	0	0	0
Bacteria/Cyanobacteria/Oxyphotobacteria/Eurycoccales/Leptococcaceae/Leptococcus JA-3-3Ab	0	0	0	0	0	0	0	0	0	0	0	0	0	0	0	0	0	0	0	0	0	0	0	0	0	0	0	0	0	0	0	0	0	0	0	0	0	0	0	0	0	0	0	0	0
Bacteria/Cyanobacteria/Oxyphotobacteria/Gloeobacterales/Gloeobacteraceae/Gloeobacter PCC-7421	0	0	0	0	0	0	0	0	0	0	0	0	0	0	0	0	0	0	0	0	0	0	0	0	0	0	0	0	0	0	0	0	0	0	0	0	0	0	0	0	0	0	0	0	0
Bacteria/Cyanobacteria/Oxyphotobacteria/Leptolyngbyales/Leptolyngbyaceae/Alkalinema CENA528	0	0	0	0	0	0	0	0	0	0	0	0	0	0	0	0	0	0	0	0	0	0	0	0	0	0	0	0	0	0	0	0	0	0	0	0	0	0	0	0	0	0	0	0	0
Bacteria/Cyanobacteria/Oxyphotobacteria/Leptolyngbyales/Leptolyngbyaceae/Arthronema SAG 12.89	0	0	0	0	0	0	0	0	0	0	0	0	0	0	0	0	0	0	0	0	0	0	0	0	0	0	0	0	0	0	0	0	0	0	0	0	0	0	0	0	0	0	0	0	0
Bacteria/Cyanobacteria/Oxyphotobacteria/Leptolyngbyales/Leptolyngbyaceae/Chamaesiphon PCC-7430	0	0	0	0	0	0	0	0	0	0	0	0	0	0	0	0	0	0	0	0	0	0	0	0	0	0	0	0	0	0	0	0	0	0	0	0	0	0	0	0	0	0	0	0	0
Bacteria/Cyanobacteria/Oxyphotobacteria/Leptolyngbyales/Leptolyngbyaceae/Greenland-10	0	0	0	0	0	0	0	0	0	0	0	0	0	0	0	0	0	0	0	0	0	0	0	0	0	0	0	0	0	0	0	0	0	0	0	0	0	0	0	0	0	0	0	0	0
Bacteria/Cyanobacteria/Oxyphotobacteria/Leptolyngbyales/Leptolyngbyaceae/HAVOmat113	0	0	0	0	0	0	0	0	0	0	0	0	0	0	0	0	0	0	0	0	0	0	0	0	0	0	0	0	0	0	0	0	0	0	0	0	0	0	0	0	0	0	0	0	0
Bacteria/Cyanobacteria/Oxyphotobacteria/Leptolyngbyales/Leptolyngbyaceae/JSC-12	0	0	0	0	0	0	0	0	0	0	0	0	0	0	0	0	0	0	0	0	0	0	0	0	0	0	0	0	0	0	0	0	0	0	0	0	0	0	0	0	0	0	0	0	0
Bacteria/Cyanobacteria/Oxyphotobacteria/Leptolyngbyales/Leptolyngbyaceae/LB3-76	0	0	0	0	0	0	0	0	0	0	0	0	0	0	0	0	0	0	0	0	0	0	0	0	0	0	0	0	0	0	0	0	0	0	0	0	0	0	0	0	0	0	0	0	0
Bacteria/Cyanobacteria/Oxyphotobacteria/Leptolyngbyales/Leptolyngbyaceae/Leptolyngbya BN43	0	0	0	0	0	0	0	0	0	0	0	0	0	0	0	0	0	0	0	0	0	0	0	0	0	0	0	0	0	0	0	0	0	0	0	0	0	0	0	0	0	0	0	0	0
Bacteria/Cyanobacteria/Oxyphotobacteria/Leptolyngbyales/Leptolyngbyaceae/Leptolyngbya Es-Yyy1000	0	0	0	0	0	0	0	0	0	0	0	0	0	0	0	0	0	0	0	0	0	0	0	0	0	0	0	0	0	0	0	0	0	0	0	0	0	0	0	0	0	0	0	0	0
Bacteria/Cyanobacteria/Oxyphotobacteria/Leptolyngbyales/Leptolyngbyaceae/Leptolyngbya FYG	0	0	0	0	0	0	0	0	0	0	0	0	0	0	0	0	0	0	0	0	0	0	0	0	0	0	0	0	0	0	0	0	0	0	0	0	0	0	0	0	0	0	0	0	0
Bacteria/Cyanobacteria/Oxyphotobacteria/Leptolyngbyales/Leptolyngbyaceae/Leptolyngbya PCC-6306	0	0	0	0	0	0	0	0	0	0	0	0	0	0	0	0	0	0	0	0	0	0	0	0	0	0	0	0	0	0	0	0	0	0	0	0	0	0	0	0	0	0	0	0	0
Bacteria/Cyanobacteria/Oxyphotobacteria/Leptolyngbyales/Leptolyngbyaceae/Leptolyngbya SAG 2411	0	0	0	0	0	0	0	0	0	0	0	0	0	0	0	0	0	0	0	0	0	0	0	0	0	0	0	0	0	0	0	0	0	0	0	0	0	0	0	0	0	0	0	0	0
Bacteria/Cyanobacteria/Oxyphotobacteria/Leptolyngbyales/Leptolyngbyaceae/Limnolyngbya CHAB4449	0	0	0	0	0	0	0	0	0	0	0	0	0	0	0	0	0	0	0	0	0	0	0	0	0	0	0	0	0	0	0	0	0	0	0	0	0	0	0	0	0	0	0	0	0
Bacteria/Cyanobacteria/Oxyphotobacteria/Leptolyngbyales/Leptolyngbyaceae/MIZ36	0	0	0	0	0	0	0	0	0	0	0	0	0	0	0	0	0	0	0	0	0	0	0	0	0	0	0	0	0	0	0	0	0	0	0	0	0	0	0	0	0	0	0	0	0
Bacteria/Cyanobacteria/Oxyphotobacteria/Leptolyngbyales/Leptolyngbyaceae/Pantanalinema CENA516	0	0	0	0	0	0	0	0	0	0	0	0	0	0	0	0	0	0	0	0	0	0	0	0	0	0	0	0	0	0	0	0	0	0	0	0	0	0	0	0	0	0	0	0	0
Bacteria/Cyanobacteria/Oxyphotobacteria/Leptolyngbyales/Leptolyngbyaceae/Phormidesmis ANT.L52.6	0	0	0	0	0	0	0	0	0	0	0	0	0	0	0	0	0	0	0	0	0	0	0	0	0	0	0	0	0	0	0	0	0	0	0	0	0	0	0	0	0	0	0	0	0
Bacteria/Cyanobacteria/Oxyphotobacteria/Leptolyngbyales/Leptolyngbyaceae/Scytolyngbya XSP1	0	0	0	0	0	0	0	0	0	0	0	0	0	0	0	0	0	0	0	0	0	0	0	0	0	0	0	0	0	0	0	0	0	0	0	0	0	0	0	0	0	0	0	0	0
Bacteria/Cyanobacteria/Oxyphotobacteria/Leptolyngbyales/Leptolyngbyaceae/uncultured	0	0	0	0	0	0	0	0	0	0	0	0	0	0	0	0	0	0	0	0	0	0	0	0	0	0	0	0	0	0	0	0	0	0	0	0	0	0	0	0	0	0	0	0	0
Bacteria/Cyanobacteria/Oxyphotobacteria/Leptolyngbyales/Leptolyngbyaceae/YB-42	0	0	0	0	0	0	0	0	0	0	0	0	0	0	0	0	0	0	0	0	0	0	0	0	0	0	0	0	0	0	0	0	0	0	0	0	0	0	0	0	0	0	0	0	0
Bacteria/Cyanobacteria/Oxyphotobacteria/Limnotrichales/Limnotrichaceae/Limnothrix	0	0	0	0	0	0	0	0	0	0	0	0	0	0	0	0	0	0	0	0	0	0	0	0	0	0	0	0	0	0	0	0	0	0	0	0	0	0	0	0	0	0	0	0	0
Bacteria/Cyanobacteria/Oxyphotobacteria/Nostocales/Chroococcidiopsaceae/Aliterella CENA595	0	0	0	0	0	0	0	0	0	0	0	0	0	0	0	0	0	0	0	0	0	0	0	0	0	0	0	0	0	0	0	0	0	0	0	0	0	0	0	0	0	0	0	0	0
Bacteria/Cyanobacteria/Oxyphotobacteria/Nostocales/Chroococcidiopsaceae/Chlorogloea SAG 10.99	0	0	0	0	0	0	0	0	0	0	0	0	0	0	0	0	0	0	0	0	0	0	0	0	0	0	0	0	0	0	0	0	0	0	0	0	0	0	0	0	0	0	0	0	0
Bacteria/Cyanobacteria/Oxyphotobacteria/Nostocales/Chroococcidiopsaceae/Chroococcidiopsis CC1	0	0	0	0	0	0	0	0	0	0	0	0	0	0	0	0	0	0	0	0	0	0	0	0	0	0	0	0	0	0	0	0	0	0	0	0	0	0	0	0	0	0	0	0	0
Bacteria/Cyanobacteria/Oxyphotobacteria/Nostocales/Chroococcidiopsaceae/Chroococcidiopsis PCC 7203	0	0	0	0	0	0	0	0	0	0	0	0	0	0	0	0	0	0	0	0	0	0	0	0	0	0	0	0	0	0	0	0	0	0	0	0	0	0	0	0	0	0	0	0	0
Bacteria/Cyanobacteria/Oxyphotobacteria/Nostocales/Chroococcidiopsaceae/Chroococcidiopsis SAG 2023	0	0	0	0	0	0	0	0	0	0	0	0	0	0	0	0	0	0	0	0	0	0	0	0	0	0	0	0	0	0	0	0	0	0	0	0	0	0	0	0	0	0	0	0	0
Bacteria/Cyanobacteria/Oxyphotobacteria/Nostocales/Chroococcidiopsaceae/Crinalium SAG 22.89	0	0	0	0	0	0	0	0	0	0	0	0	0	0	0	0	0	0	0	0	0	0	0	0	0	0	0	0	0	0	0	0	0	0	0	0	0	0	0	0	0	0	0	0	0
Bacteria/Cyanobacteria/Oxyphotobacteria/Nostocales/Chroococcidiopsaceae/Dapisostemonum CCIBt 3536	0	0	0	0	0	0	0	0	0	0	0	0	0	0	0	0	0	0	0	0	0	0	0	0	0	0	0	0	0	0	0	0	0	0	0	0	0	0	0	0	0	0	0	0	0
Bacteria/Cyanobacteria/Oxyphotobacteria/Nostocales/Chroococcidiopsaceae/Gloeocapsa PCC-7428	0	0	0	0	0	0	0	0	0	0	0	0	0	0	0	0	0	0	0	0	0	0	0	0	0	0	0	0	0	0	0	0	0	0	0	0	0	0	0	0	0	0	0	0	0
Bacteria/Cyanobacteria/Oxyphotobacteria/Nostocales/Chroococcidiopsaceae/Myxosarcina SAG 30.84	0	0	0	0	0	0	0	0	0	0	0	0	0	0	0	0	0	0	0	0	0	0	0	0	0	0	0	0	0	0	0	0	0	0	0	0	0	0	0	0	0	0	0	0	0
Bacteria/Cyanobacteria/Oxyphotobacteria/Nostocales/Chroococcidiopsaceae/uncultured	0	0	0	0	0	0	0	0	0	0	0	0	0	0	0	0	0	0	0	0	0	0	0	0	0	0	0	0	0	0	0	0	0	0	0	0	0	0	0	0	0	0	0	0	0
Bacteria/Cyanobacteria/Oxyphotobacteria/Nostocales/Coleofasciculaceae/Caldora VP642b	0	0	0	0	0	0	0	0	0	0	0	0	0	0	0	0	0	0	0	0	0	0	0	0	0	0	0	0	0	0	0	0	0	0	0	0	0	0	0	0	0	0	0	0	0
Bacteria/Cyanobacteria/Oxyphotobacteria/Nostocales/Coleofasciculaceae/Coleofasciculus PCC-7420	0	0	0	0	0	0	0	0	0	0	0	0	0	0	0	0	0	0	0	0	0	0	0	0	0	0	0	0	0	0	0	0	0	0	0	0	0	0	0	0	0	0	0	0	0
Bacteria/Cyanobacteria/Oxyphotobacteria/Nostocales/Coleofasciculaceae/Microcoleus CENA344	0	0	0	0	0	0	0	0	0	0	0	0	0	0	0	0	0	0	0	0	0	0	0	0	0	0	0	0	0	0	0	0	0	0	0	0	0	0	0	0	0	0	0	0	0
Bacteria/Cyanobacteria/Oxyphotobacteria/Nostocales/Coleofasciculaceae/Microcoleus PCC-7113	0	0	0	0	0	0	0	0	0	0	0	0	0	0	0	0	0	0	0	0	0	0	0	0	0	0	0	0	0	0	0	0	0	0	0	0	0	0	0	0	0	0	0	0	0
Bacteria/Cyanobacteria/Oxyphotobacteria/Nostocales/Coleofasciculaceae/Microcoleus SAG 1449-1a	0	0	0	0	0	0	0	0	0	0	0	0	0	0	0	0	0	0	0	0	0	0	0	0	0	0	0	0	0	0	0	0	0	0	0	0	0	0	0	0	0	0	0	0	0
Bacteria/Cyanobacteria/Oxyphotobacteria/Nostocales/Coleofasciculaceae/Moorea 3L	0	0	0	0	0	0	0	0	0	0	0	0	0	0	0	0	0	0	0	0	0	0	0	0	0	0	0	0	0	0	0	0	0	0	0	0	0	0	0	0	0	0	0	0	0
Bacteria/Cyanobacteria/Oxyphotobacteria/Nostocales/Coleofasciculaceae/Potamolinea 1PC	0	0	0	0	0	0	0	0	0	0	0	0	0	0	0	0	0	0	0	0	0	0	0	0	0	0	0	0	0	0	0	0	0	0	0	0	0	0	0	0	0	0	0	0	0
Bacteria/Cyanobacteria/Oxyphotobacteria/Nostocales/Coleofasciculaceae/Symploca PCC-8002	0	0	0	0	0	0	0	0	0	0	0	0	0	0	0	0	0	0	0	0	0	0	0	0	0	0	0	0	0	0	0	0	0	0	0	0	0	0	0	0	0	0	0	0	0
Bacteria/Cyanobacteria/Oxyphotobacteria/Nostocales/Coleofasciculaceae/Symplocastrum CPER-KK1	0	0	0	0	0	0	0	0	0	0	0	0	0	0	0	0	0	0	0	0	0	0	0	0	0	0	0	0	0	0	0	0	0	0	0	0	0	0	0	0	0	0	0	0	0
Bacteria/Cyanobacteria/Oxyphotobacteria/Nostocales/Coleofasciculaceae/uncultured	0	0	0	0	0	0	0	0	0	0	0	0	0	0	0	0	0	0	0	0	0	0	0	0	0	0	0	0	0	0	0	0	0	0	0	0	0	0	0	0	0	0	0	0	0
Bacteria/Cyanobacteria/Oxyphotobacteria/Nostocales/Coleofasciculaceae/Wilmottia Ant-Ph58	0	0	0	0	0	0	0	0	0	0	0	0	0	0	0	0	0	0	0	0	0	0	0	0	0	0	0	0	0	0	0	0	0	0	0	0	0	0	0	0	0	0	0	0	0
Bacteria/Cyanobacteria/Oxyphotobacteria/Nostocales/Cyanobacteriaceae/Annamia HOs24	0	0	0	0	0	0	0	0	0	0	0	0	0	0	0	0	0	0	0	0	0	0	0	0	0	0	0	0	0	0	0	0	0	0	0	0	0	0	0	0	0	0	0	0	0
Bacteria/Cyanobacteria/Oxyphotobacteria/Nostocales/Cyanobacteriaceae/Cyanobacterium CLg1	0	0	0	0	0	0	0	0	0	0	0	0	0	0	0	0	0	0	0	0	0	0	0	0	0	0	0	0	0	0	0	0	0	0	0	0	0	0	0	0	0	0	0	0	0
Bacteria/Cyanobacteria/Oxyphotobacteria/Nostocales/Cyanobacteriaceae/Cyanobacterium PCC-10605	0	0	0	0	0	0	0	0	0	0	0	0	0	0	0	0	0	0	0	0	0	0	0	0	0	0	0	0	0	0	0	0	0	0	0	0	0	0	0	0	0	0	0	0	0
Bacteria/Cyanobacteria/Oxyphotobacteria/Nostocales/Cyanobacteriaceae/Cyanobacterium PCC-7202	0	0	0	0	0	0	0	0	0	0	0	0	0	0	0	0	0	0	0	0	0	0	0	0	0	0	0	0	0	0	0	0	0	0	0	0	0	0	0	0	0	0	0	0	0
Bacteria/Cyanobacteria/Oxyphotobacteria/Nostocales/Cyanobacteriaceae/Geitlerinema LD9	95	52	42	27	26	23	23	17	21	30	0	13	99	64	124	33	38	25	0	14	0	93	98	173	146	194	177	74	50	70	57	43	40	80	70	47	195	140	64	24	0	21	76	91	122
Bacteria/Cyanobacteria/Oxyphotobacteria/Nostocales/Cyanobacteriaceae/Geminocystis PCC-6308	0	0	0	0	0	0	0	0	0	0	0	0	0	0	0	0	0	0	0	0	0	0	0	0	0	0	0	0	0	0	0	0	0	0	0	0	0	0	0	0	0	0	0	0	0
Bacteria/Cyanobacteria/Oxyphotobacteria/Nostocales/Cyanobacteriaceae/Merismopedia AICB1015	0	0	0	0	0	0	0	0	0	0	0	0	0	0	0	0	0	0	0	0	0	0	0	0	0	0	0	0	0	0	0	0	0	0	0	0	0	0	0	0	0	0	0	0	0
Bacteria/Cyanobacteria/Oxyphotobacteria/Nostocales/Cyanobacteriaceae/Symphothece PCC-7002	0	0	0	0	0	0	0	0	0	0	0	0	0	0	0	0	0	0	0	0	0	0	0	0	0	0	0	0	0	0	0	0	0	0	0	0	0	0	0	0	0	0	0	0	0
Bacteria/Cyanobacteria/Oxyphotobacteria/Nostocales/Cyanobacteriaceae/uncultured	0	0	0	0	0	0	0	0	0	0	0	0	0	0	0	0	0	0	0	0	0	0	0	0	0	0	0	0	0	0	0	0	0	0	0	0	0	0	0	0	0	0	0	0	0
Bacteria/Cyanobacteria/Oxyphotobacteria/Nostocales/Geitlerinemaceae/Geitlerinema PCC-7105	0	0	0	0	0	0	0	0	0	0	0	0	0	0	0	0	0	0	0	0	0	0	0	0	0	0	0	0	0	0	0	0	0	0	0	0	0	0	0	0	0	0	0	0	0
Bacteria/Cyanobacteria/Oxyphotobacteria/Nostocales/Geitlerinemaceae/Geitlerinema PCC-9228	0	0	0	0	0	0	0	0	0	0	0	0	0	0	0	0	0	0	0	0	0	0	0	0	0	0	0	0	0	0	0	0	0	0	0	0	0	0	0	0	0	0	0	0	0
Bacteria/Cyanobacteria/Oxyphotobacteria/Nostocales/Gloeocapsaceae/Gleocapsa	0	0	0	0	0	0	0	0	0	0	0	0	0	0	0	0	0	0	0	0	0	0	0	0	0	0	0	0	0	0	0	0	0	0	0	0	0	0	0	0	0	0	0	0	0
Bacteria/Cyanobacteria/Oxyphotobacteria/Nostocales/Microcystaceae/Atelocyanobacterium (UCYN-A)	0	0	0	0	0	0	0	0	0	0	0	0	0	0	0	0	0	0	0	0	0	0	0	0	0	0	0	0	0	0	0	0	0	0	0	0	0	0	0	0	0	0	0	0	0
Bacteria/Cyanobacteria/Oxyphotobacteria/Nostocales/Microcystaceae/Chalicogloea CCALA 975	0	0	0	0	0	0	0	0	0	0	0	0	0	0	0	0	0	0	0	0	0	0	0	0	0	0	0	0	0	0	0	0	0	0	0	0	0	0	0	0	0	0	0	0	0
Bacteria/Cyanobacteria/Oxyphotobacteria/Nostocales/Microcystaceae/Crocosphaera WH 0003 (UCYN-B)	0	0	0	0	0	0	0	0	0	0	0	0	0	0	0	0	0	0	0	0	0	0	0	0	0	0	0	0	0	0	0	0	0	0	0	0	0	0	0	0	0	0	0	0	0
Bacteria/Cyanobacteria/Oxyphotobacteria/Nostocales/Microcystaceae/Cyanothece ATCC 51142 (UCYN-C)	0	0	0	0	0	0	0	0	0	0	0	0	0	0	0	0	0	0	0	0	0	0	0	0	0	0	0	0	0	0	0	0	0	0	0	0	0	0	0	0	0	0	0	0	0
Bacteria/Cyanobacteria/Oxyphotobacteria/Nostocales/Microcystaceae/Cyanothece PCC-7424	0	0	0	0	0	0	0	0	0	0	0	0	0	0	0	0	0	0	0	0	0	0	0	0	0	0	0	0	0	0	0	0	0	0	0	0	0	0	0	0	0	0	0	0	0
Bacteria/Cyanobacteria/Oxyphotobacteria/Nostocales/Microcystaceae/Cyanothece PCC-8801	0	0	0	0	0	0	0	0	0	0	0	0	0	0	0	0	0	0	0	0	0	0	0	0	0	0	0	0	0	0	0	0	0	0	0	0	0	0	0	0	0	0	0	0	0
Bacteria/Cyanobacteria/Oxyphotobacteria/Nostocales/Microcystaceae/Gloeothece PCC-6501	0	0	0	0	0	0	0	0	0	0	0	0	0	0	0	0	0	0	0	0	0	0	0	0	0	0	0	0	0	0	0	0	0	0	0	0	0	0	0	0	0	0	0	0	0
Bacteria/Cyanobacteria/Oxyphotobacteria/Nostocales/Microcystaceae/Merismopedia 0BB39S01	0	0	0	0	0	0	0	0	0	0	0	0	0	0	0	0	0	0	0	0	0	0	0	0	0	0	0	0	0	0	0	0	0	0	0	0	0	0	0	0	0	0	0	0	0
Bacteria/Cyanobacteria/Oxyphotobacteria/Nostocales/Microcystaceae/Microcystis PCC-7914	0	0	0	0	0	0	0	0	0	0	0	0	0	0	0	0	0	0	0	0	0	0	0	0	0	0	0	0	0	0	0	0	0	0	0	0	0	0	0	0	0	0	0	0	0
Bacteria/Cyanobacteria/Oxyphotobacteria/Nostocales/Microcystaceae/Pleurocapsa PCC-7327	0	0	0	0	0	0	0	0	0	0	0	0	0	0	0	0	0	0	0	0	0	0	0	0	0	0	0	0	0	0	0	0	0	0	0	0	0	0	0	0	0	0	0	0	0
Bacteria/Cyanobacteria/Oxyphotobacteria/Nostocales/Microcystaceae/Snowella 0TU37S04	0	0	0	0	0	0	0	0	0	0	0	0	0	0	0	0	0	0	0	0	0	0	0	0	0	0	0	0	0	0	0	0	0	0	0	0	0	0	0	0	0	0	0	0	0
Bacteria/Cyanobacteria/Oxyphotobacteria/Nostocales/Microcystaceae/SU2 symbiont group	0	0	0	0	0	0	0	0	0	0	0	0	0	0	0	0	0	0	0	0	0	0	0	0	0	0	0	0	0	0	0	0	0	0	0	0	0	0	0	0	0	0	0	0	0
Bacteria/Cyanobacteria/Oxyphotobacteria/Nostocales/Microcystaceae/Synechocystis BDHKU-20401	0	0	0	0	0	0	0	0	0	0	0	0	0	0	0	0	0	0	0	0	0	0	0	0	0	0	0	0	0	0	0	0	0	0	0	0	0	0	0	0	0	0	0	0	0
Bacteria/Cyanobacteria/Oxyphotobacteria/Nostocales/Microcystaceae/Synechocystis CCALA 700	0	0	0	0	0	0	0	0	0	0	0	0	0	0	0	0	0	0	0	0	0	0	0	0	0	0	0	0	0	0	0	0	0	0	0	0	0	0	0	0	0	0	0	0	0
Bacteria/Cyanobacteria/Oxyphotobacteria/Nostocales/Microcystaceae/Synechocystis PCC-6803	0	0	0	0	0	0	0	0	0	0	0	0	0	0	0	0	0	0	0	0	0	0	0	0	0	0	0	0	0	0	0	0	0	0	0	0	0	0	0	0	0	0	0	0	0
Bacteria/Cyanobacteria/Oxyphotobacteria/Nostocales/Microcystaceae/UCYN-C	0	0	0	0	0	0	0	0	0	0	0	0	0	0	0	0	0	0	0	0	0	0	0	0	0	0	0	0	0	0	0	0	0	0	0	0	0	0	0	0	0	0	0	0	0
Bacteria/Cyanobacteria/Oxyphotobacteria/Nostocales/Microcystaceae/uncultured	0	0	0	0	0	0	0	0	0	0	0	0	0	0	0	0	0	0	0	0	0	0	0	0	0	0	0	0	0	0	0	0	0	0	0	0	0	0	0	0	0	0	0	0	0
Bacteria/Cyanobacteria/Oxyphotobacteria/Nostocales/Nostocaceae/Aetokthonos AEL04	0	0	0	0	0	0	0	0	0	0	0	0	0	0	0	0	0	0	0	0	0	0	0	0	0	0	0	0	0	0	0	0	0	0	0	0	0	0	0	0	0	0	0	0	0
Bacteria/Cyanobacteria/Oxyphotobacteria/Nostocales/Nostocaceae/Anabaena 4-Vresova10-JH	0	0	0	0	0	0	0	0	0	0	0	0	0	0	0	0	0	0	0	0	0	0	0	0	0	0	0	0	0	0	0	0	0	0	0	0	0	0	0	0	0	0	0	0	0
Bacteria/Cyanobacteria/Oxyphotobacteria/Nostocales/Nostocaceae/Anabaena BECID22	0	0	0	0	0	0	0	0	0	0	0	0	0	0	0	0	0	0	0	0	0	0	0	0	0	0	0	0	0	0	0	0	0	0	0	0	0	0	0	0	0	0	0	0	0
Bacteria/Cyanobacteria/Oxyphotobacteria/Nostocales/Nostocaceae/Anabaena HBU1	0	0	0	0	0	0	0	0	0	0	0	0	0	0	0	0	0	0	0	0	0	0	0	0	0	0	0	0	0	0	0	0	0	0	0	0	0	0	0	0	0	0	0	0	0
Bacteria/Cyanobacteria/Oxyphotobacteria/Nostocales/Nostocaceae/Anabaena PCC-7108	0	0	0	0	0	0	0	0	0	0	0	0	0	0	0	0	0	0	0	0	0	0	0	0	0	0	0	0	0	0	0	0	0	0	0	0	0	0	0	0	0	0	0	0	0
Bacteria/Cyanobacteria/Oxyphotobacteria/Nostocales/Nostocaceae/Anabaena PCC-7122	0	0	0	0	0	0	0	0	0	0	0	0	0	0	0	0	0	0	0	0	0	0	0	0	0	0	0	0	0	0	0	0	0	0	0	0	0	0	0	0	0	0	0	0	0
Bacteria/Cyanobacteria/Oxyphotobacteria/Nostocales/Nostocaceae/Anabaena XPORK15F	0	0	0	0	0	0	0	0	0	0	0	0	0	0	0	0	0	0	0	0	0	0	0	0	0	0	0	0	0	0	0	0	0	0	0	0	0	0	0	0	0	0	0	0	0
Bacteria/Cyanobacteria/Oxyphotobacteria/Nostocales/Nostocaceae/Ancylothrix 8PC	0	0	0	0	0	0	0	0	0	0	0	0	0	0	0	0	0	0	0	0	0	0	0	0	0	0	0	0	0	0	0	0	0	0	0	0	0	0	0	0	0	0	0	0	0
Bacteria/Cyanobacteria/Oxyphotobacteria/Nostocales/Nostocaceae/Aphanizomenon MDT14a	0	0	0	0	0	0	0	0	0	0	0	0	0	0	0	0	0	0	0	0	0	0	0	0	0	0	0	0	0	0	0	0	0	0	0	0	0	0	0	0	0	0	0	0	0
Bacteria/Cyanobacteria/Oxyphotobacteria/Nostocales/Nostocaceae/Aphanizomenon NIES81	61	0	47	0	0	0	46	0	44	0	0	69	42	0	0	0	0	0	53	57	0	0	0	0	0	0	0	0	0	0	0	0	0	0	0	0	0	0	0	0	0	0	0	0	0
Bacteria/Cyanobacteria/Oxyphotobacteria/Nostocales/Nostocaceae/Calothrix 336-3	0	0	0	0	0	0	0	0	0	0	0	0	0	0	0	0	0	0	0	0	0	0	0	0	0	0	0	0	0	0	0	0	0	0	0	0	0	0	0	0	0	0	0	0	0
Bacteria/Cyanobacteria/Oxyphotobacteria/Nostocales/Nostocaceae/Calothrix PCC-6303	0	0	0	0	0	0	0	0	0	0	0	0	0	0	0	0	0	0	0	0	0	0	0	0	0	0	0	0	0	0	0	0	0	0	0	0	0	0	0	0	0	0	0	0	0
Bacteria/Cyanobacteria/Oxyphotobacteria/Nostocales/Nostocaceae/Calothrix PMC232.04	0	0	0	0	0	0	0	0	0	0	0	0	0	0	0	0	0	0	0	0	0	0	0	0	0	0	0	0	0	0	0	0	0	0	0	0	0	0	0	0	0	0	0	0	0
Bacteria/Cyanobacteria/Oxyphotobacteria/Nostocales/Nostocaceae/Calothrix UAM 374	0	0	0	0	0	0	0	0	0	0	0	0	0	0	0	0	0	0	0	0	0	0	0	0	0	0	0	0	0	0	0	0	0	0	0	0	0	0	0	0	0	0	0	0	0
Bacteria/Cyanobacteria/Oxyphotobacteria/Nostocales/Nostocaceae/Chakia 8	0	0	0	0	0	0	0	0	0	0	0	0	0	0	0	0	0	0	0	0	0	0	0	0	0	0	0	0	0	0	0	0	0	0	0	0	0	0	0	0	0	0	0	0	0
Bacteria/Cyanobacteria/Oxyphotobacteria/Nostocales/Nostocaceae/Chlorogloeopsis PCC-7518	0	0	0	0	0	0	0	0	0	0	0	0	0	0	0	0	0	0	0	0	0	0	0	0	0	0	0	0	0	0	0	0	0	0	0	0	0	0	0	0	0	0	0	0	0
Bacteria/Cyanobacteria/Oxyphotobacteria/Nostocales/Nostocaceae/Chrysosporum KA1.1	0	0	0	0	0	0	0	0	0	0	0	0	0	0	0	0	0	0	0	0	0	0	0	0	0	0	0	0	0	0	0	0	0	0	0	0	0	0	0	0	0	0	0	0	0
Bacteria/Cyanobacteria/Oxyphotobacteria/Nostocales/Nostocaceae/Cuspidothrix LMECYA 163	0	0	0	0	0	0	0	0	0	0	0	0	0	0	0	0	0	0	0	0	0	0	0	0	0	0	0	0	0	0	0	0	0	0	0	0	0	0	0	0	0	0	0	0	0
Bacteria/Cyanobacteria/Oxyphotobacteria/Nostocales/Nostocaceae/Cyanomargarita APA-RS9	0	0	0	0	0	0	0	0	0	0	0	0	0	0	0	0	0	0	0	0	0	0	0	0	0	0	0	0	0	0	0	0	0	0	0	0	0	0	0	0	0	0	0	0	0
Bacteria/Cyanobacteria/Oxyphotobacteria/Nostocales/Nostocaceae/Cylindrospermopsis CRJ1	0	0	0	0	0	0	0	0	0	0	0	0	0	0	0	0	0	0	0	0	0	0	0	0	0	0	0	0	0	0	0	0	0	0	0	0	0	0	0	0	0	0	0	0	0
Bacteria/Cyanobacteria/Oxyphotobacteria/Nostocales/Nostocaceae/Cylindrospermum CENA33	0	0	0	0	0	0	0	0	0	0	0	0	0	0	0	0	0	0	0	0	0	0	0	0	0	0	0	0	0	0	0	0	0	0	0	0	0	0	0	0	0	0	0	0	0
Bacteria/Cyanobacteria/Oxyphotobacteria/Nostocales/Nostocaceae/Cylindrospermum PCC-7417	0	0	0	0	0	0	0	0	0	0	0	0	0	0	0	0	0	0	0	0	0	0	0	0	0	0	0	0	0	0	0	0	0	0	0	0	0	0	0	0	0	0	0	0	0
Bacteria/Cyanobacteria/Oxyphotobacteria/Nostocales/Nostocaceae/Desmonostoc PCC-6302	0	0	0	0	0	0	0	0	0	0	0	0	0	0	0	0	0	0	0	0	0	0	0	0	0	0	0	0	0	0	0	0	0	0	0	0	0	0	0	0	0	0	0	0	0
Bacteria/Cyanobacteria/Oxyphotobacteria/Nostocales/Nostocaceae/Desmonostoc PCC-7422	0	0	0	0	0	0	0	0	0	0	0	0	0	0	0	0	0	0	0	0	0	0	0	0	0	0	0	0	0	0	0	0	0	0	0	0	0	0	0	0	0	0	0	0	0
Bacteria/Cyanobacteria/Oxyphotobacteria/Nostocales/Nostocaceae/Dolichospermum NIES41	0	0	0	0	0	0	0	0	0	0	0	0	0	0	0	0	0	0	0	0	0	0	0	0	0	0	0	0	0	0	0	0	0	0	0	0	0	0	0	0	0	0	0	0	0
Bacteria/Cyanobacteria/Oxyphotobacteria/Nostocales/Nostocaceae/Ewamiania TS0513	0	0	0	0	0	0	0	0	0	0	0	0	0	0	0	0	0	0	0	0	0	0	0	0	0	0	0	0	0	0	0	0	0	0	0	0	0	0	0	0	0	0	0	0	0
Bacteria/Cyanobacteria/Oxyphotobacteria/Nostocales/Nostocaceae/Fischerella CENA298	0	0	0	0	0	0	0	0	0	0	0	0	0	0	0	0	0	0	0	0	0	0	0	0	0	0	0	0	0	0	0	0	0	0	0	0	0	0	0	0	0	0	0	0	0
Bacteria/Cyanobacteria/Oxyphotobacteria/Nostocales/Nostocaceae/Fischerella PCC-9339	0	0	0	0	0	0	0	0	0	0	0	0	0	0	0	0	0	0	0	0	0	0	0	0	0	0	0	0	0	0	0	0	0	0	0	0	0	0	0	0	0	0	0	0	0
Bacteria/Cyanobacteria/Oxyphotobacteria/Nostocales/Nostocaceae/Fortiea PCC-7126	0	0	0	0	0	0	0	0	0	0	0	0	0	0	0	0	0	0	0	0	0	0	0	0	0	0	0	0	0	0	0	0	0	0	0	0	0	0	0	0	0	0	0	0	0
Bacteria/Cyanobacteria/Oxyphotobacteria/Nostocales/Nostocaceae/Gloeotrichia PMC236.04	0	0	0	0	0	0	0	0	0	0	0	0	0	0	0	0	0	0	0	0	0	0	0	0	0	0	0	0	0	0	0	0	0	0	0	0	0	0	0	0	0	0	0	0	0
Bacteria/Cyanobacteria/Oxyphotobacteria/Nostocales/Nostocaceae/Gloeotrichia PYH6	0	0	0	0	0	0	0	0	0	0	0	0	0	0	0	0	0	0	0	0	0	0	0	0	0	0	0	0	0	0	0	0	0	0	0	0	0	0	0	0	0	0	0	0	0
Bacteria/Cyanobacteria/Oxyphotobacteria/Nostocales/Nostocaceae/Halotia CENA158	0	0	0	0	0	0	0	0	0	0	0	0	0	0	0	0	0	0	0	0	0	0	0	0	0	0	0	0	0	0	0	0	0	0	0	0	0	0	0	0	0	0	0	0	0
Bacteria/Cyanobacteria/Oxyphotobacteria/Nostocales/Nostocaceae/Iphinoe LOS-B1	0	0	0	0	0	0	0	0	0	0	0	0	0	0	0	0	0	0	0	0	0	0	0	0	0	0	0	0	0	0	0	0	0	0	0	0	0	0	0	0	0	0	0	0	0
Bacteria/Cyanobacteria/Oxyphotobacteria/Nostocales/Nostocaceae/Mastigocladopsis PCC-10914	0	0	0	0	0	0	0	0	0	0	0	0	0	0	0	0	0	0	0	0	0	0	0	0	0	0	0	0	0	0	0	0	0	0	0	0	0	0	0	0	0	0	0	0	0
Bacteria/Cyanobacteria/Oxyphotobacteria/Nostocales/Nostocaceae/Mastigocoleus BC008	0	0	0	0	0	0	0	0	0	0	0	0	0	0	0	0	0	0	0	0	0	0	0	0	0	0	0	0	0	0	0	0	0	0	0	0	0	0	0	0	0	0	0	0	0
Bacteria/Cyanobacteria/Oxyphotobacteria/Nostocales/Nostocaceae/Nodularia PCC-9350	0	0	0	0	0	0	0	0	0	0	0	0	0	0	0	0	0	0	0	0	0	0	0	0	0	0	0	0	0	0	0	0	0	0	0	0	0	0	0	0	0	0	0	0	0
Bacteria/Cyanobacteria/Oxyphotobacteria/Nostocales/Nostocaceae/Nostoc BDU-40302	0	0	0	0	0	0	0	0	0	0	0	0	0	0	0	0	0	0	0	0	0	0	0	0	0	0	0	0	0	0	0	0	0	0	0	0	0	0	0	0	0	0	0	0	0
Bacteria/Cyanobacteria/Oxyphotobacteria/Nostocales/Nostocaceae/Nostoc PCC-7107	0	0	0	0	0	0	0	0	0	0	0	0	0	0	0	0	0	0	0	0	0	0	0	0	0	0	0	0	0	0	0	0	0	0	0	0	0	0	0	0	0	0	0	0	0
Bacteria/Cyanobacteria/Oxyphotobacteria/Nostocales/Nostocaceae/Nostoc PCC-73102	0	0	0	0	0	0	0	0	0	0	0	0	0	0	0	0	0	0	0	0	0	0	0	0	0	0	0	0	0	0	0	0	0	0	0	0	0	0	0	0	0	0	0	0	0
Bacteria/Cyanobacteria/Oxyphotobacteria/Nostocales/Nostocaceae/Nostoc PCC-7524	0	0	0	0	0	0	0	0	0	0	0	0	0	0	0	0	0	0	0	0	0	0	0	0	0	0	0	0	0	0	0	0	0	0	0	0	0	0	0	0	0	0	0	0	0
Bacteria/Cyanobacteria/Oxyphotobacteria/Nostocales/Nostocaceae/Nostoc PCC-8976	0	0	0	0	0	0	0	0	0	0	0	0	0	0	0	0	0	0	0	0	0	0	0	0	0	0	0	0	0	0	0	0	0	0	0	0	0	0	0	0	0	0	0	0	0
Bacteria/Cyanobacteria/Oxyphotobacteria/Nostocales/Nostocaceae/Nostoc SAG 60.79	0	0	0	0	0	0	0	0	0	0	0	0	0	0	0	0	0	0	0	0	0	0	0	0	0	0	0	0	0	0	0	0	0	0	0	0	0	0	0	0	0	0	0	0	0
Bacteria/Cyanobacteria/Oxyphotobacteria/Nostocales/Nostocaceae/Petalonema ANT.LG2.8	0	0	0	0	0	0	0	0	0	0	0	0	0	0	0	0	0	0	0	0	0	0	0	0	0	0	0	0	0	0	0	0	0	0	0	0	0	0	0	0	0	0	0	0	0
Bacteria/Cyanobacteria/Oxyphotobacteria/Nostocales/Nostocaceae/Phyllonema CENA325	0	0	0	0	0	0	0	0	0	0	0	0	0	0	0	0	0	0	0	0	0	0	0	0	0	0	0	0	0	0	0	0	0	0	0	0	0	0	0	0	0	0	0	0	0
Bacteria/Cyanobacteria/Oxyphotobacteria/Nostocales/Nostocaceae/Richelia HH01	0	0	0	0	0	0	0	0	0	0	0	0	0	0	0	0	0	0	0	0	0	0	0	0	0	0	0	0	0	0	0	0	0	0	0	0	0	0	0	0	0	0	0	0	0
Bacteria/Cyanobacteria/Oxyphotobacteria/Nostocales/Nostocaceae/Rivularia PCC-7116	0	0	0	0	0	0	0	0	0	0	0	0	0	0	0	0	0	0	0	0	0	0	0	0	0	0	0	0	0	0	0	0	0	0	0	0	0	0	0	0	0	0	0	0	0
Bacteria/Cyanobacteria/Oxyphotobacteria/Nostocales/Nostocaceae/Scytonema PCC-7110	0	0	0	0	0	0	0	0	0	0	0	0	0	0	0	0	0	0	0	0	0	0	0	0	0	0	0	0	0	0	0	0	0	0	0	0	0	0	0	0	0	0	0	0	0
Bacteria/Cyanobacteria/Oxyphotobacteria/Nostocales/Nostocaceae/Scytonema UTEX 2349	0	0	0	0	0	0	0	0	0	0	0	0	0	0	0	0	0	0	0	0	0	0	0	0	0	0	0	0	0	0	0	0	0	0	0	0	0	0	0	0	0	0	0	0	0
Bacteria/Cyanobacteria/Oxyphotobacteria/Nostocales/Nostocaceae/Scytonema VB-61278	0	0	0	0	0	0	0	0	0	0	0	0	0	0	0	0	0	0	0	0	0	0	0	0	0	0	0	0	0	0	0	0	0	0	0	0	0	0	0	0	0	0	0	0	0
Bacteria/Cyanobacteria/Oxyphotobacteria/Nostocales/Nostocaceae/Sphaerospermopsis BCCUSP55	0	0	0	0	0	0	0	0	0	0	0	0	0	0	0	0	0	0	0	0	0	0	0	0	0	0	0	0	0	0	0	0	0	0	0	0	0	0	0	0	0	0	0	0	0
Bacteria/Cyanobacteria/Oxyphotobacteria/Nostocales/Nostocaceae/Stigonema DHS1-1	0	0	0	0	0	0	0	0	0	0	0	0	0	0	0	0	0	0	0	0	0	0	0	0	0	0	0	0	0	0	0	0	0	0	0	0	0	0	0	0	0	0	0	0	0
Bacteria/Cyanobacteria/Oxyphotobacteria/Nostocales/Nostocaceae/Stigonema SAG 48.90	0	0	0	0	0	0	0	0	0	0	0	0	0	0	0	0	0	0	0	0	0	0	0	0	0	0	0	0	0	0	0	0	0	0	0	0	0	0	0	0	0	0	0	0	0
Bacteria/Cyanobacteria/Oxyphotobacteria/Nostocales/Nostocaceae/Synechococcus PCC-7902	0	0	0	0	0	0	0	0	0	0	0	0	0	0	0	0	0	0	0	0	0	0	0	0	0	0	0	0	0	0	0	0	0	0	0	0	0	0	0	0	0	0	0	0	0
Bacteria/Cyanobacteria/Oxyphotobacteria/Nostocales/Nostocaceae/Tolypothrix PCC-7601	0	0	0	0	0	0	0	0	0	0	0	0	0	0	0	0	0	0	0	0	0	0	0	0	0	0	0	0	0	0	0	0	0	0	0	0	0	0	0	0	0	0	0	0	0
Bacteria/Cyanobacteria/Oxyphotobacteria/Nostocales/Nostocaceae/Trichormus HINDAK 2001-4	0	0	0	0	0	0	0	0	0	0	0	0	0	0	0	0	0	0	0	0	0	0	0	0	0	0	0	0	0	0	0	0	0	0	0	0	0	0	0	0	0	0	0	0	0
Bacteria/Cyanobacteria/Oxyphotobacteria/Nostocales/Nostocaceae/uncultured	0	0	0	0	0	0	0	0	0	0	0	0	0	0	0	0	0	0	0	0	0	0	0	0	0	0	0	0	0	0	0	0	0	0	0	0	0	0	0	0	0	0	0	0	0
Bacteria/Cyanobacteria/Oxyphotobacteria/Nostocales/Nostocales Incertae Sedis/Coleofasciculus CCY0602	0	0	0	0	0	0	0	0	0	0	0	0	0	0	0	0	0	0	0	0	0	0	0	0	0	0	0	0	0	0	0	0	0	0	0	0	0	0	0	0	0	0	0	0	0
Bacteria/Cyanobacteria/Oxyphotobacteria/Nostocales/Nostocales Incertae Sedis/Desertifilum KR2012-2	0	0	0	0	0	0	0	0	0	0	0	0	0	0	0	0	0	0	0	0	0	0	0	0	0	0	0	0	0	0	0	0	0	0	0	0	0	0	0	0	0	0	0	0	0
Bacteria/Cyanobacteria/Oxyphotobacteria/Nostocales/Nostocales Incertae Sedis/Hormoscilla SI04-45	0	0	0	0	0	0	0	0	0	0	0	0	0	0	0	0	0	0	0	0	0	0	0	0	0	0	0	0	0	0	0	0	0	0	0	0	0	0	0	0	0	0	0	0	0
Bacteria/Cyanobacteria/Oxyphotobacteria/Nostocales/Nostocales Incertae Sedis/Microseira Carmichael-Alabama	0	0	0	0	0	0	0	0	0	0	0	0	0	0	0	0	0	0	0	0	0	0	0	0	0	0	0	0	0	0	0	0	0	0	0	0	0	0	0	0	0	0	0	0	0
Bacteria/Cyanobacteria/Oxyphotobacteria/Nostocales/Nostocales Incertae Sedis/Oscillatoria SAG8.92	0	0	0	0	0	0	0	0	0	0	0	0	0	0	0	0	0	0	0	0	0	0	0	0	0	0	0	0	0	0	0	0	0	0	0	0	0	0	0	0	0	0	0	0	0
Bacteria/Cyanobacteria/Oxyphotobacteria/Nostocales/Nostocales Incertae Sedis/Roseofilum AO1-A	0	0	0	0	0	0	0	0	0	0	0	0	0	0	0	0	0	0	0	0	0	0	0	0	0	0	0	0	0	0	0	0	0	0	0	0	0	0	0	0	0	0	0	0	0
Bacteria/Cyanobacteria/Oxyphotobacteria/Nostocales/Oscillatoriaceae/Oscillatoria PCC-10802	0	0	0	0	0	0	0	0	0	0	0	0	0	0	0	0	0	0	0	0	0	0	0	0	0	0	0	0	0	0	0	0	0	0	0	0	0	0	0	0	0	0	0	0	0
Bacteria/Cyanobacteria/Oxyphotobacteria/Nostocales/Oscillatoriaceae/Oscillatoria PCC-6304	0	0	0	0	0	0	0	0	0	0	0	0	0	0	0	0	0	0	0	0	0	0	0	0	0	0	0	0	0	0	0	0	0	0	0	0	0	0	0	0	0	0	0	0	0
Bacteria/Cyanobacteria/Oxyphotobacteria/Nostocales/Oscillatoriaceae/Oxynema BDU 92071	0	0	0	0	0	0	0	0	0	0	0	0	0	0	0	0	0	0	0	0	0	0	0	0	0	0	0	0	0	0	0	0	0	0	0	0	0	0	0	0	0	0	0	0	0
Bacteria/Cyanobacteria/Oxyphotobacteria/Nostocales/Oscillatoriaceae/Phormidium ETS-05	0	0	0	0	0	0	0	0	0	0	0	0	0	0	0	0	0	0	0	0	0	0	0	0	0	0	0	0	0	0	0	0	0	0	0	0	0	0	0	0	0	0	0	0	0
Bacteria/Cyanobacteria/Oxyphotobacteria/Nostocales/Oscillatoriaceae/Planktothricoides SR001	0	0	0	0	0	0	0	0	0	0	0	0	0	0	0	0	0	0	0	0	0	0	0	0	0	0	0	0	0	0	0	0	0	0	0	0	0	0	0	0	0	0	0	0	0
Bacteria/Cyanobacteria/Oxyphotobacteria/Nostocales/Oscillatoriaceae/uncultured	0	0	0	0	0	0	0	0	0	0	0	0	0	0	0	0	0	0	0	0	0	0	0	0	0	0	0	0	0	0	0	0	0	0	0	0	0	0	0	0	0	0	0	0	0
Bacteria/Cyanobacteria/Oxyphotobacteria/Nostocales/Paraspirulinaceae/ESFC-1	0	0	0	0	0	0	0	0	0	0	0	0	0	0	0	0	0	0	0	0	0	0	0	0	0	0	0	0	0	0	0	0	0	0	0	0	0	0	0	0	0	0	0	0	0
Bacteria/Cyanobacteria/Oxyphotobacteria/Nostocales/Paraspirulinaceae/Halospirulina CCC Baja-95 Cl.2	0	0	0	0	0	0	0	0	0	0	0	0	0	0	0	0	0	0	0	0	0	0	0	0	0	0	0	0	0	0	0	0	0	0	0	0	0	0	0	0	0	0	0	0	0
Bacteria/Cyanobacteria/Oxyphotobacteria/Nostocales/Paraspirulinaceae/Spirulina CCC Snake P-Y-85	0	0	0	0	0	0	0	0	0	0	0	0	0	0	0	0	0	0	0	0	0	0	0	0	0	0	0	0	0	0	0	0	0	0	0	0	0	0	0	0	0	0	0	0	0
Bacteria/Cyanobacteria/Oxyphotobacteria/Nostocales/Paraspirulinaceae/Spirulina DRTO-55.2	0	0	0	0	0	0	0	0	0	0	0	0	0	0	0	0	0	0	0	0	0	0	0	0	0	0	0	0	0	0	0	0	0	0	0	0	0	0	0	0	0	0	0	0	0
Bacteria/Cyanobacteria/Oxyphotobacteria/Nostocales/Paraspirulinaceae/Spirulina P7	0	0	0	0	0	0	0	0	0	0	0	0	0	0	0	0	0	0	0	0	0	0	0	0	0	0	0	0	0	0	0	0	0	0	0	0	0	0	0	0	0	0	0	0	0
Bacteria/Cyanobacteria/Oxyphotobacteria/Nostocales/Paraspirulinaceae/Spirulina PCC-6313	0	0	0	0	0	0	0	0	0	0	0	0	0	0	0	0	0	0	0	0	0	0	0	0	0	0	0	0	0	0	0	0	0	0	0	0	0	0	0	0	0	0	0	0	0
Bacteria/Cyanobacteria/Oxyphotobacteria/Nostocales/Paraspirulinaceae/Spirulina PCC-9445	0	0	0	0	0	0	0	0	0	0	0	0	0	0	0	0	0	0	0	0	0	0	0	0	0	0	0	0	0	0	0	0	0	0	0	0	0	0	0	0	0	0	0	0	0
Bacteria/Cyanobacteria/Oxyphotobacteria/Nostocales/Paraspirulinaceae/uncultured	0	0	0	0	0	0	0	0	0	0	0	0	0	0	0	0	0	0	0	0	0	0	0	0	0	0	0	0	0	0	0	0	0	0	0	0	0	0	0	0	0	0	0	0	0
Bacteria/Cyanobacteria/Oxyphotobacteria/Nostocales/Phormidiaceae/Arthrospira PCC-7345	0	0	0	0	0	0	0	0	0	0	0	0	0	0	0	0	0	0	0	0	0	0	0	0	0	0	0	0	0	0	0	0	0	0	0	0	0	0	0	0	0	0	0	0	0
Bacteria/Cyanobacteria/Oxyphotobacteria/Nostocales/Phormidiaceae/Cephalothrix SAG 75.79	0	0	0	0	0	0	0	0	0	0	0	0	0	0	0	0	0	0	0	0	0	0	0	0	0	0	0	0	0	0	0	0	0	0	0	0	0	0	0	0	0	0	0	0	0
Bacteria/Cyanobacteria/Oxyphotobacteria/Nostocales/Phormidiaceae/Kamptonema PCC-6407	0	0	0	0	0	0	0	0	0	0	0	0	0	0	0	0	0	0	0	0	0	0	0	0	0	0	0	0	0	0	0	0	0	0	0	0	0	0	0	0	0	0	0	0	0
Bacteria/Cyanobacteria/Oxyphotobacteria/Nostocales/Phormidiaceae/Lyngbya PCC-7419	0	0	0	0	0	0	0	0	0	0	0	0	0	0	0	0	0	0	0	0	0	0	0	0	0	0	0	0	0	0	0	0	0	0	0	0	0	0	0	0	0	0	0	0	0
Bacteria/Cyanobacteria/Oxyphotobacteria/Nostocales/Phormidiaceae/Phormidium IAM M-71	0	0	0	0	0	0	0	0	0	0	0	0	0	0	0	0	0	0	0	0	0	0	0	0	0	0	0	0	0	0	0	0	0	0	0	0	0	0	0	0	0	0	0	0	0
Bacteria/Cyanobacteria/Oxyphotobacteria/Nostocales/Phormidiaceae/Planktothrix NIVA-CYA 15	0	0	0	0	0	0	0	0	0	0	0	0	0	0	0	0	0	0	0	0	0	0	0	0	0	0	0	0	0	0	0	0	0	0	0	0	0	0	0	0	0	0	0	0	0
Bacteria/Cyanobacteria/Oxyphotobacteria/Nostocales/Phormidiaceae/Trichocoleus SAG 26.92	0	0	0	0	0	0	0	0	0	0	0	0	0	0	0	0	0	0	0	0	0	0	0	0	0	0	0	0	0	0	0	0	0	0	0	0	0	0	0	0	0	0	0	0	0
Bacteria/Cyanobacteria/Oxyphotobacteria/Nostocales/Phormidiaceae/Trichodesmium IMS101	36	14	0	0	0	0	0	0	0	0	0	0	14	19	29	0	0	0	0	0	0	24	15	52	28	58	38	19	0	0	0	0	0	47	24	16	64	29	25	0	0	0	21	24	36
Bacteria/Cyanobacteria/Oxyphotobacteria/Nostocales/Phormidiaceae/Tychonema CCAP 1459-11B	0	0	0	0	0	0	0	0	0	0	0	0	0	0	0	0	0	0	0	0	0	0	0	0	0	0	0	0	0	0	0	0	0	0	0	0	0	0	0	0	0	0	0	0	0
Bacteria/Cyanobacteria/Oxyphotobacteria/Nostocales/Phormidiaceae/uncultured	0	0	0	0	0	0	0	0	0	0	0	0	0	0	0	0	0	0	0	0	0	0	0	0	0	0	0	0	0	0	0	0	0	0	0	0	0	0	0	0	0	0	0	0	0
Bacteria/Cyanobacteria/Oxyphotobacteria/Nostocales/Prochloraceae/Prochloron P1-Palau	0	0	0	0	0	0	0	0	0	0	0	0	0	0	0	0	0	0	0	0	0	0	0	0	0	0	0	0	0	0	0	0	0	0	0	0	0	0	0	0	0	0	0	0	0
Bacteria/Cyanobacteria/Oxyphotobacteria/Nostocales/Rubidibacteraceae/Dactylococcopsis PCC-8305	0	0	0	0	0	0	0	0	0	0	0	0	0	0	0	0	0	0	0	0	0	0	0	0	0	0	0	0	0	0	0	0	0	0	0	0	0	0	0	0	0	0	0	0	0
Bacteria/Cyanobacteria/Oxyphotobacteria/Nostocales/Rubidibacteraceae/Rubidibacter KORDI 51-2	0	0	0	0	0	0	0	0	0	0	0	0	0	0	0	0	0	0	0	0	0	0	0	0	0	0	0	0	0	0	0	0	0	0	0	0	0	0	0	0	0	0	0	0	0
Bacteria/Cyanobacteria/Oxyphotobacteria/Nostocales/Rubidibacteraceae/uncultured	0	0	0	0	0	0	0	0	0	0	0	0	0	0	0	0	0	0	0	0	0	0	0	0	0	0	0	0	0	0	0	0	0	0	0	0	0	0	0	0	0	0	0	0	0
Bacteria/Cyanobacteria/Oxyphotobacteria/Nostocales/Xenococcaceae/Chroococcidiopsis PCC-6712	0	0	0	0	0	0	0	0	0	0	0	0	0	0	0	0	0	0	0	0	0	0	0	0	0	0	0	0	0	0	0	0	0	0	0	0	0	0	0	0	0	0	0	0	0
Bacteria/Cyanobacteria/Oxyphotobacteria/Nostocales/Xenococcaceae/Gloeocapsopsis BDHKU 35101	0	0	0	0	0	0	0	0	0	0	0	0	0	0	0	0	0	0	0	0	0	0	0	0	0	0	0	0	0	0	0	0	0	0	0	0	0	0	0	0	0	0	0	0	0
Bacteria/Cyanobacteria/Oxyphotobacteria/Nostocales/Xenococcaceae/Pleurocapsa PCC-7319	0	0	0	0	0	0	0	0	0	0	0	0	0	0	0	0	0	0	0	0	0	0	0	0	0	0	0	0	0	0	0	0	0	0	0	0	0	0	0	0	0	0	0	0	0
Bacteria/Cyanobacteria/Oxyphotobacteria/Nostocales/Xenococcaceae/uncultured	0	0	0	0	0	0	0	0	0	0	0	0	0	0	0	0	0	0	0	0	0	0	0	0	0	0	0	0	0	0	0	0	0	0	0	0	0	0	0	0	0	0	0	0	0
Bacteria/Cyanobacteria/Oxyphotobacteria/Nostocales/Xenococcaceae/Xenococcus CRM	0	0	0	0	0	0	0	0	0	0	0	0	0	0	0	0	0	0	0	0	0	0	0	0	0	0	0	0	0	0	0	0	0	0	0	0	0	0	0	0	0	0	0	0	0
Bacteria/Cyanobacteria/Oxyphotobacteria/Nostocales/Xenococcaceae/Xenococcus PCC-7305	0	0	0	0	0	0	0	0	0	0	0	0	0	0	0	0	0	0	0	0	0	0	0	0	0	0	0	0	0	0	0	0	0	0	0	0	0	0	0	0	0	0	0	0	0
Bacteria/Cyanobacteria/Oxyphotobacteria/Oxyphotobacteria Incertae Sedis/Unknown Family/Calothrix KVSF5	0	0	0	0	0	0	0	0	0	0	0	0	0	0	0	0	0	0	0	0	0	0	0	0	0	0	0	0	0	0	0	0	0	0	0	0	0	0	0	0	0	0	0	0	0
Bacteria/Cyanobacteria/Oxyphotobacteria/Oxyphotobacteria Incertae Sedis/Unknown Family/CENA359	0	0	0	0	0	0	0	0	0	0	0	0	0	0	0	0	0	0	0	0	0	0	0	0	0	0	0	0	0	0	0	0	0	0	0	0	0	0	0	0	0	0	0	0	0
Bacteria/Cyanobacteria/Oxyphotobacteria/Oxyphotobacteria Incertae Sedis/Unknown Family/CENA518	0	0	0	0	0	0	0	0	0	0	0	0	0	0	0	0	0	0	0	0	0	0	0	0	0	0	0	0	0	0	0	0	0	0	0	0	0	0	0	0	0	0	0	0	0
Bacteria/Cyanobacteria/Oxyphotobacteria/Oxyphotobacteria Incertae Sedis/Unknown Family/Geitlerinema PCC-8501	0	0	0	0	0	0	0	0	0	0	0	0	0	0	0	0	0	0	0	0	0	0	0	0	0	0	0	0	0	0	0	0	0	0	0	0	0	0	0	0	0	0	0	0	0
Bacteria/Cyanobacteria/Oxyphotobacteria/Oxyphotobacteria Incertae Sedis/Unknown Family/Leptolyngbya ANT.L52.2	0	0	0	0	0	0	0	0	0	0	0	0	0	0	0	0	0	0	0	0	0	0	0	0	0	0	0	0	0	0	0	0	0	0	0	0	0	0	0	0	0	0	0	0	0
Bacteria/Cyanobacteria/Oxyphotobacteria/Oxyphotobacteria Incertae Sedis/Unknown Family/Leptolyngbya ANT.L67.1	0	0	0	0	0	0	0	0	0	0	0	0	0	0	0	0	0	0	0	0	0	0	0	0	0	0	0	0	0	0	0	0	0	0	0	0	0	0	0	0	0	0	0	0	0
Bacteria/Cyanobacteria/Oxyphotobacteria/Oxyphotobacteria Incertae Sedis/Unknown Family/Leptolyngbya EcFYyyy-00	0	0	0	0	0	0	0	0	0	0	0	0	0	0	0	0	0	0	0	0	0	0	0	0	0	0	0	0	0	0	0	0	0	0	0	0	0	0	0	0	0	0	0	0	0
Bacteria/Cyanobacteria/Oxyphotobacteria/Oxyphotobacteria Incertae Sedis/Unknown Family/Leptolyngbya LEGE-06070	0	0	0	0	0	0	0	0	0	0	0	0	0	0	0	0	0	0	0	0	0	0	0	0	0	0	0	0	0	0	0	0	0	0	0	0	0	0	0	0	0	0	0	0	0
Bacteria/Cyanobacteria/Oxyphotobacteria/Oxyphotobacteria Incertae Sedis/Unknown Family/Leptolyngbya VRUC 135	0	0	0	0	0	0	0	0	0	0	0	0	0	0	0	0	0	0	0	0	0	0	0	0	0	0	0	0	0	0	0	0	0	0	0	0	0	0	0	0	0	0	0	0	0
Bacteria/Cyanobacteria/Oxyphotobacteria/Oxyphotobacteria Incertae Sedis/Unknown Family/MTP1	0	0	0	0	0	0	0	0	0	0	0	0	0	0	0	0	0	0	0	0	0	0	0	0	0	0	0	0	0	0	0	0	0	0	0	0	0	0	0	0	0	0	0	0	0
Bacteria/Cyanobacteria/Oxyphotobacteria/Oxyphotobacteria Incertae Sedis/Unknown Family/Phormidium CYN64	0	0	0	0	0	0	0	0	0	0	0	0	0	0	0	0	0	0	0	0	0	0	0	0	0	0	0	0	0	0	0	0	0	0	0	0	0	0	0	0	0	0	0	0	0
Bacteria/Cyanobacteria/Oxyphotobacteria/Oxyphotobacteria Incertae Sedis/Unknown Family/Phormidium SAG 37.90	0	0	0	0	0	0	0	0	0	0	0	0	0	0	0	0	0	0	0	0	0	0	0	0	0	0	0	0	0	0	0	0	0	0	0	0	0	0	0	0	0	0	0	0	0
Bacteria/Cyanobacteria/Oxyphotobacteria/Oxyphotobacteria Incertae Sedis/Unknown Family/Pseudanabaena NgrPSln22	0	0	0	0	0	0	0	0	0	0	0	0	0	0	0	0	0	0	0	0	0	0	0	0	0	0	0	0	0	0	0	0	0	0	0	0	0	0	0	0	0	0	0	0	0
Bacteria/Cyanobacteria/Oxyphotobacteria/Oxyphotobacteria Incertae Sedis/Unknown Family/uncultured	0	0	0	0	0	0	0	0	0	0	0	0	0	0	0	0	0	0	0	0	0	0	0	0	0	0	0	0	0	0	0	0	0	0	0	0	0	0	0	0	0	0	0	0	0
Bacteria/Cyanobacteria/Oxyphotobacteria/Phormidesmiales/Nodosilineaceae/Halomicronema TFEP1	0	0	0	0	0	0	0	0	0	0	0	0	0	0	0	0	0	0	0	0	0	0	0	0	0	0	0	0	0	0	0	0	0	0	0	0	0	0	0	0	0	0	0	0	0
Bacteria/Cyanobacteria/Oxyphotobacteria/Phormidesmiales/Nodosilineaceae/Leptolyngbya PCC-6406	0	0	0	0	0	0	0	0	0	0	0	0	0	0	0	0	0	0	0	0	0	0	0	0	0	0	0	0	0	0	0	0	0	0	0	0	0	0	0	0	0	0	0	0	0
Bacteria/Cyanobacteria/Oxyphotobacteria/Phormidesmiales/Nodosilineaceae/Nodosilinea PCC-7104	0	0	0	0	0	0	0	0	0	0	0	0	0	0	0	0	0	0	0	0	0	0	0	0	0	0	0	0	0	0	0	0	0	0	0	0	0	0	0	0	0	0	0	0	0
Bacteria/Cyanobacteria/Oxyphotobacteria/Phormidesmiales/Nodosilineaceae/uncultured	0	0	0	0	0	0	0	0	0	0	0	0	0	0	0	0	0	0	0	0	0	0	0	0	0	0	0	0	0	0	0	0	0	0	0	0	0	0	0	0	0	0	0	0	0
Bacteria/Cyanobacteria/Oxyphotobacteria/Phormidesmiales/Phormidesmiaceae/Acrophormium PCC-7375	0	0	0	0	0	0	0	0	0	0	0	0	0	0	0	0	0	0	0	0	0	0	0	0	0	0	0	0	0	0	0	0	0	0	0	0	0	0	0	0	0	0	0	0	0
Bacteria/Cyanobacteria/Oxyphotobacteria/Phormidesmiales/Phormidesmiaceae/Phormidesmis ANT.LACV5.1	0	0	0	0	0	0	0	0	0	0	0	0	0	0	0	0	0	0	0	0	0	0	0	0	0	0	0	0	0	0	0	0	0	0	0	0	0	0	0	0	0	0	0	0	0
Bacteria/Cyanobacteria/Oxyphotobacteria/Phormidesmiales/Phormidesmiaceae/Phormidium MBIC10003	0	0	0	0	0	0	0	0	0	0	0	0	0	0	0	0	0	0	0	0	0	0	0	0	0	0	0	0	0	0	0	0	0	0	0	0	0	0	0	0	0	0	0	0	0
Bacteria/Cyanobacteria/Oxyphotobacteria/Phormidesmiales/Phormidesmiaceae/uncultured	0	0	0	0	0	0	0	0	0	0	0	0	0	0	0	0	0	0	0	0	0	0	0	0	0	0	0	0	0	0	0	0	0	0	0	0	0	0	0	0	0	0	0	0	0
Bacteria/Cyanobacteria/Oxyphotobacteria/Pseudanabaenales/Pseudanabaenaceae/Pseudanabaena PCC-6802	0	0	0	0	0	0	0	0	0	0	0	0	0	0	0	0	0	0	0	0	0	0	0	0	0	0	0	0	0	0	0	0	0	0	0	0	0	0	0	0	0	0	0	0	0
Bacteria/Cyanobacteria/Oxyphotobacteria/Pseudanabaenales/Pseudanabaenaceae/Pseudanabaena PCC-7367	0	0	0	0	0	0	0	0	0	0	0	0	0	0	0	0	0	0	0	0	0	0	0	0	0	0	0	0	0	0	0	0	0	0	0	0	0	0	0	0	0	0	0	0	0
Bacteria/Cyanobacteria/Oxyphotobacteria/Pseudanabaenales/Pseudanabaenaceae/Pseudanabaena PCC-7429	41	0	0	0	0	0	0	0	0	0	0	0	0	0	0	0	0	0	0	0	0	0	0	0	0	0	0	0	0	0	0	0	0	44	0	0	0	0	0	0	0	0	0	0	0
Bacteria/Cyanobacteria/Oxyphotobacteria/Pseudanabaenales/Pseudanabaenaceae/Synechococcus PCC-7502	0	0	0	0	0	0	0	0	0	0	0	0	0	0	0	0	0	0	0	0	0	0	0	0	0	0	0	0	0	0	0	0	0	0	0	0	0	0	0	0	0	0	0	0	0
Bacteria/Cyanobacteria/Oxyphotobacteria/Pseudanabaenales/Pseudanabaenaceae/uncultured	0	0	0	0	0	0	0	0	0	0	0	0	0	0	0	0	0	0	0	0	0	0	0	0	0	0	0	0	0	0	0	0	0	0	0	0	0	0	0	0	0	0	0	0	0
Bacteria/Cyanobacteria/Oxyphotobacteria/Synechococcales/Cyanobiaceae/[Synechococcus] spongiarum group	0	0	0	0	0	0	0	0	0	0	0	0	0	0	0	0	0	0	0	0	0	0	0	0	0	0	0	0	0	0	0	0	0	0	0	0	0	0	0	0	0	0	0	0	0
Bacteria/Cyanobacteria/Oxyphotobacteria/Synechococcales/Cyanobiaceae/Cyanobium PCC-6307	210	115	134	101	107	116	246	209	211	0	0	134	211	168	234	209	260	160	117	131	0	149	139	101	165	107	155	0	0	0	0	0	0	161	110	162	0	0	132	0	0	108	0	152	114
Bacteria/Cyanobacteria/Oxyphotobacteria/Synechococcales/Cyanobiaceae/Prochlorococcus MIT9313	0	0	0	0	0	0	0	0	0	0	0	0	0	0	0	0	0	0	0	0	0	0	0	0	0	0	0	0	0	0	0	0	0	0	0	0	0	0	0	0	0	0	0	0	0
Bacteria/Cyanobacteria/Oxyphotobacteria/Synechococcales/Cyanobiaceae/Synechococcus CC9902	0	0	0	0	0	0	0	0	0	0	0	0	0	0	0	0	0	0	0	0	0	0	0	0	0	0	0	0	0	0	0	0	0	0	0	0	0	0	0	0	0	0	0	0	0
Bacteria/Cyanobacteria/Oxyphotobacteria/Synechococcales/Cyanobiaceae/Synechococcus MBIC10613	0	0	0	0	0	0	0	0	0	0	0	0	0	0	0	0	0	0	0	0	0	0	0	0	0	0	0	0	0	0	0	0	0	0	0	0	0	0	0	0	0	0	0	0	0
Bacteria/Cyanobacteria/Oxyphotobacteria/Synechococcales/Prochlorotrichaceae/Prochlorothrix PCC-9006	0	0	0	0	0	0	0	0	0	0	0	0	0	0	0	0	0	0	0	0	0	0	0	0	0	0	0	0	0	0	0	0	0	0	0	0	0	0	0	0	0	0	0	0	0
Bacteria/Cyanobacteria/Oxyphotobacteria/Synechococcales/Synechococcaceae/Microcystis NIES42	0	0	0	0	0	0	0	0	0	0	0	0	0	0	0	0	0	0	0	0	0	0	0	0	0	0	0	0	0	0	0	0	0	0	0	0	0	0	0	0	0	0	0	0	0
Bacteria/Cyanobacteria/Oxyphotobacteria/Synechococcales/Synechococcaceae/Synechococcus PCC-7942	0	0	0	0	0	0	0	0	0	0	0	0	0	0	0	0	0	0	0	0	0	0	0	0	0	0	0	0	0	0	0	0	0	0	0	0	0	0	0	0	0	0	0	0	0
Bacteria/Cyanobacteria/Oxyphotobacteria/Synechococcales/Synechococcaceae/uncultured	0	0	0	0	0	0	0	0	0	0	0	0	0	0	0	0	0	0	0	0	0	0	0	0	0	0	0	0	0	0	0	0	0	0	0	0	0	0	0	0	0	0	0	0	0
Bacteria/Cyanobacteria/Oxyphotobacteria/Synechococcales/Synechococcales Incertae Sedis/Schizothrix LEGE 07164	0	0	0	0	0	0	0	0	0	0	0	0	0	0	0	0	0	0	0	0	0	0	0	0	0	0	0	0	0	0	0	0	0	0	0	0	0	0	0	0	0	0	0	0	0
Bacteria/Cyanobacteria/Oxyphotobacteria/Thermosynechococcales/Acaryochloridaceae/Acaryochloris MBIC11017	0	0	0	0	0	0	0	0	0	0	0	0	0	0	0	0	0	0	0	0	0	0	0	0	0	0	0	0	0	0	0	0	0	0	0	0	0	0	0	0	0	0	0	0	0
Bacteria/Cyanobacteria/Oxyphotobacteria/Thermosynechococcales/Thermosynechococcaceae/Cyanothece PCC 7425	0	0	0	0	0	0	0	0	0	0	0	0	0	0	0	0	0	0	0	0	0	0	0	0	0	0	0	0	0	0	0	0	0	0	0	0	0	0	0	0	0	0	0	0	0
Bacteria/Cyanobacteria/Oxyphotobacteria/Thermosynechococcales/Thermosynechococcaceae/Loriellopsis LF-B5	0	0	0	0	0	0	0	0	0	0	0	0	0	0	0	0	0	0	0	0	0	0	0	0	0	0	0	0	0	0	0	0	0	0	0	0	0	0	0	0	0	0	0	0	0
Bacteria/Cyanobacteria/Oxyphotobacteria/Thermosynechococcales/Thermosynechococcaceae/Synechococcus IR11	0	0	0	0	0	0	0	0	0	0	0	0	0	0	0	0	0	0	0	0	0	0	0	0	0	0	0	0	0	0	0	0	0	0	0	0	0	0	0	0	0	0	0	0	0
Bacteria/Cyanobacteria/Oxyphotobacteria/Thermosynechococcales/Thermosynechococcaceae/Thermosynechococcus BP-1	0	0	0	0	0	0	0	0	0	0	0	0	0	0	0	0	0	0	0	0	0	0	0	0	0	0	0	0	0	0	0	0	0	0	0	0	0	0	0	0	0	0	0	0	0
Bacteria/Cyanobacteria/Oxyphotobacteria/Thermosynechococcales/Thermosynechococcaceae/uncultured	0	0	0	0	0	0	0	0	0	0	0	0	0	0	0	0	0	0	0	0	0	0	0	0	0	0	0	0	0	0	0	0	0	0	0	0	0	0	0	0	0	0	0	0	0
Bacteria/Deferribacteres/Deferribacteres/Deferribacterales/Deferribacteraceae/Calditerrivibrio	0	0	0	0	0	0	0	0	0	0	0	0	0	0	0	0	0	0	0	0	0	0	0	0	0	0	0	0	0	0	0	0	0	0	0	0	0	0	0	0	0	0	0	0	0
Bacteria/Deferribacteres/Deferribacteres/Deferribacterales/Deferribacteraceae/Deferribacter	0	0	0	0	0	0	0	0	0	0	0	0	0	0	0	0	0	0	0	0	0	0	0	0	0	0	0	0	0	0	0	0	0	0	0	0	0	0	0	0	0	0	0	0	0
Bacteria/Deferribacteres/Deferribacteres/Deferribacterales/Deferribacteraceae/Denitrovibrio	0	0	0	0	0	0	0	0	0	0	0	0	0	0	0	0	0	0	0	0	0	0	0	0	0	0	0	0	0	0	0	0	0	0	0	0	0	0	0	0	0	0	0	0	0
Bacteria/Deferribacteres/Deferribacteres/Deferribacterales/Deferribacteraceae/Geovibrio	0	0	0	0	0	0	0	0	0	0	0	0	0	0	0	0	0	0	0	0	0	0	0	0	0	0	0	0	0	0	0	0	0	0	0	0	0	0	0	0	0	0	0	0	0
Bacteria/Deferribacteres/Deferribacteres/Deferribacterales/Deferribacteraceae/Mucispirillum	0	0	0	0	0	0	0	0	0	0	0	0	0	0	0	0	0	0	0	0	0	0	0	0	0	0	0	0	0	0	0	0	0	0	0	0	0	0	0	0	0	0	0	0	0
Bacteria/Deferribacteres/Deferribacteres/Deferribacterales/Deferribacteraceae/Seleniivibrio	0	0	0	0	0	0	0	0	0	0	0	0	0	0	0	0	0	0	0	0	0	0	0	0	0	0	0	0	0	0	0	0	0	0	0	0	0	0	0	0	0	0	0	0	0
Bacteria/Deferribacteres/Deferribacteres/Deferribacterales/Deferribacteraceae/uncultured	0	0	0	0	0	0	0	0	0	0	0	0	0	0	0	0	0	0	0	0	0	0	0	0	0	0	0	0	0	0	0	0	0	0	0	0	0	0	0	0	0	0	0	0	0
Bacteria/Deinococcus-Thermus/Deinococci/Deinococcales/Deinococcaceae/Deinobacterium	0	0	0	0	0	0	0	0	0	0	0	0	0	0	0	0	0	0	0	0	0	0	0	0	0	0	0	0	0	0	0	0	0	0	0	0	0	0	0	0	0	0	0	0	0
Bacteria/Deinococcus-Thermus/Deinococci/Deinococcales/Deinococcaceae/Deinococcus	0	0	0	0	0	0	0	0	0	0	0	0	0	0	0	0	0	0	0	0	0	0	0	0	0	0	0	0	0	0	0	0	0	0	0	0	0	0	0	0	0	0	0	0	0
Bacteria/Deinococcus-Thermus/Deinococci/Deinococcales/Deinococcaceae/uncultured	0	0	0	0	0	0	0	0	0	0	0	0	0	0	0	0	0	0	0	0	0	0	0	0	0	0	0	0	0	0	0	0	0	0	0	0	0	0	0	0	0	0	0	0	0
Bacteria/Deinococcus-Thermus/Deinococci/Deinococcales/Trueperaceae/Truepera	0	0	0	0	0	0	0	0	0	0	0	0	0	0	0	0	0	0	0	0	0	0	0	0	0	0	0	0	0	0	0	0	0	0	0	0	0	0	0	0	0	0	0	0	0
Bacteria/Deinococcus-Thermus/Deinococci/Thermales/Thermaceae/Meiothermus	0	0	0	0	0	0	0	0	0	0	0	0	0	0	0	0	0	0	0	0	0	0	0	0	0	0	0	0	0	0	0	0	0	0	0	0	0	0	0	0	0	0	0	0	0
Bacteria/Deinococcus-Thermus/Deinococci/Thermales/Thermaceae/Oceanithermus	0	0	0	0	0	0	0	0	0	0	0	0	0	0	0	0	0	0	0	0	0	0	0	0	0	0	0	0	0	0	0	0	0	0	0	0	0	0	0	0	0	0	0	0	0
Bacteria/Deinococcus-Thermus/Deinococci/Thermales/Thermaceae/Thermus	0	0	0	0	0	0	0	0	0	0	0	0	0	0	0	0	0	0	0	0	0	0	0	0	0	0	0	0	0	0	0	0	0	0	0	0	0	0	0	0	0	0	0	0	0
Bacteria/Dependentiae/Babeliae/Babeliales/Babeliaceae/Candidatus Babela	0	0	0	0	0	0	0	0	0	0	0	0	0	0	0	0	0	0	0	0	0	0	0	0	0	0	0	0	0	0	0	0	0	0	0	0	0	0	0	0	0	0	0	0	0
Bacteria/Elusimicrobia/Elusimicrobia/Elusimicrobiales/Elusimicrobiaceae/Elusimicrobium	0	0	0	0	0	0	0	0	0	0	0	0	0	0	0	0	0	0	0	0	0	0	0	0	0	0	0	0	0	0	0	0	0	0	0	0	0	0	0	0	0	0	0	0	0
Bacteria/Elusimicrobia/Endomicrobia/Endomicrobiales/Endomicrobiaceae/Candidatus Endomicrobium	43	16	15	14	11	20	35	17	38	0	0	0	17	0	15	24	13	0	28	16	18	16	12	15	12	17	10	20	0	17	17	10	0	25	12	18	19	14	16	23	14	18	16	29	18
Bacteria/Entotheonellaeota/Entotheonellia/Entotheonellales/Entotheonellaceae/Candidatus Entotheonella	0	0	0	0	0	0	0	0	0	0	0	0	0	0	0	0	0	0	0	0	0	0	0	0	0	0	0	0	0	0	0	0	0	0	0	0	0	0	0	0	0	0	0	0	0
Bacteria/Epsilonbacteraeota/Campylobacteria/Campylobacterales/Arcobacteraceae/Arcobacter	45	0	0	0	0	0	0	0	0	0	0	0	28	0	31	0	0	0	0	0	0	0	0	0	0	0	0	0	0	0	0	0	0	0	0	0	0	0	0	0	0	0	0	0	0
Bacteria/Epsilonbacteraeota/Campylobacteria/Campylobacterales/Campylobacteraceae/Campylobacter	0	0	0	0	0	0	0	0	0	0	0	0	0	0	0	0	0	0	0	0	0	0	0	0	0	0	0	0	0	0	0	0	0	0	0	0	0	0	0	0	0	0	0	0	0
Bacteria/Epsilonbacteraeota/Campylobacteria/Campylobacterales/Helicobacteraceae/Helicobacter	13	0	0	0	0	0	0	0	0	0	0	0	0	0	0	0	0	0	0	0	0	0	0	0	0	0	0	0	0	0	0	0	0	0	0	0	0	0	0	0	0	0	0	0	0
Bacteria/Epsilonbacteraeota/Campylobacteria/Campylobacterales/Helicobacteraceae/uncultured	0	0	0	0	0	0	0	0	0	0	0	0	0	0	0	0	0	0	0	0	0	0	0	0	0	0	0	0	0	0	0	0	0	0	0	0	0	0	0	0	0	0	0	0	0
Bacteria/Epsilonbacteraeota/Campylobacteria/Campylobacterales/Helicobacteraceae/Wolinella	0	0	0	0	0	0	0	0	0	0	0	0	0	0	0	0	0	0	0	0	0	0	0	0	0	0	0	0	0	0	0	0	0	0	0	0	0	0	0	0	0	0	0	0	0
Bacteria/Epsilonbacteraeota/Campylobacteria/Campylobacterales/Nitratiruptoraceae/Hydrogenimonas	0	0	0	0	0	0	0	0	0	0	0	0	0	0	0	0	0	0	0	0	0	0	0	0	0	0	0	0	0	0	0	0	0	0	0	0	0	0	0	0	0	0	0	0	0
Bacteria/Epsilonbacteraeota/Campylobacteria/Campylobacterales/Nitratiruptoraceae/Nitratiruptor	0	0	0	0	0	0	0	0	0	0	0	0	0	0	0	0	0	0	0	0	0	0	0	0	0	0	0	0	0	0	0	0	0	0	0	0	0	0	0	0	0	0	0	0	0
Bacteria/Epsilonbacteraeota/Campylobacteria/Campylobacterales/Sulfurospirillaceae/Sulfurospirillum	0	0	0	0	0	0	0	0	0	0	0	0	0	0	0	0	0	0	0	0	94	0	0	0	0	0	0	0	0	0	0	0	0	0	0	0	0	0	0	0	0	0	0	0	0
Bacteria/Epsilonbacteraeota/Campylobacteria/Campylobacterales/Sulfurovaceae/Nitratifractor	0	0	0	0	0	0	0	0	0	0	0	0	0	0	0	0	0	0	0	0	0	0	0	0	0	0	0	0	0	0	0	0	0	0	0	0	0	0	0	0	0	0	0	0	0
Bacteria/Epsilonbacteraeota/Campylobacteria/Campylobacterales/Sulfurovaceae/Sulfurovum	416	272	239	65	0	72	0	0	0	0	0	0	127	115	188	0	0	0	0	0	0	0	85	0	110	140	137	79	0	59	0	0	0	0	0	0	0	0	75	0	0	0	0	0	0
Bacteria/Epsilonbacteraeota/Campylobacteria/Campylobacterales/Thiovulaceae/Sulfuricurvum	0	0	0	0	0	0	0	0	0	0	0	0	0	0	0	0	0	0	0	0	0	0	0	0	0	0	0	0	0	0	0	0	0	0	0	0	0	0	0	0	0	0	0	0	0
Bacteria/Epsilonbacteraeota/Campylobacteria/Campylobacterales/Thiovulaceae/Sulfurimonas	465	211	225	87	105	201	0	0	0	0	0	0	317	277	364	0	0	0	0	0	120	0	70	61	139	204	216	0	0	71	0	0	0	0	0	0	0	0	71	0	0	0	0	0	0
Bacteria/Epsilonbacteraeota/Campylobacteria/Campylobacterales/Thiovulaceae/Thiovulum	0	0	0	0	0	0	0	0	0	0	0	0	0	0	0	0	0	0	0	0	0	0	0	0	0	0	0	0	0	0	0	0	0	0	0	0	0	0	0	0	0	0	0	0	0
Bacteria/Epsilonbacteraeota/Campylobacteria/Nautiliales/Nautiliaceae/Caminibacter	0	0	0	0	0	0	0	0	0	0	0	0	0	0	0	0	0	0	0	0	0	0	0	0	0	0	0	0	0	0	0	0	0	0	0	0	0	0	0	0	0	0	0	0	0
Bacteria/Epsilonbacteraeota/Campylobacteria/Nautiliales/Nautiliaceae/Thioreductor	0	0	0	0	0	0	0	0	0	0	0	0	0	0	0	0	0	0	0	0	0	0	0	0	0	0	0	0	0	0	0	0	0	0	0	0	0	0	0	0	0	0	0	0	0
Bacteria/Epsilonbacteraeota/Desulfurellia/Desulfurellales/Desulfurellaceae/Desulfurella	0	0	0	0	0	0	0	0	0	0	0	0	0	0	0	0	0	0	0	0	0	0	0	0	0	0	0	0	0	0	0	0	0	0	0	0	0	0	0	0	0	0	0	0	0
Bacteria/Epsilonbacteraeota/Desulfurellia/Desulfurellales/Hippeaceae/Hippea	0	0	0	0	0	0	0	0	0	0	0	0	0	0	0	0	0	0	0	0	0	0	0	0	0	0	0	0	0	0	0	0	0	0	0	0	0	0	0	0	0	0	0	0	0
Bacteria/Fibrobacteres/Chitinivibrionia/Chitinivibrionales/Chitinivibrionaceae/Chitinivibrio	0	0	0	0	0	0	0	0	0	0	0	0	0	0	0	0	0	0	0	0	0	0	0	0	0	0	0	0	0	0	0	0	0	0	0	0	0	0	0	0	0	0	0	0	0
Bacteria/Fibrobacteres/Chitinivibrionia/Chitinivibrionales/Chitinivibrionaceae/possible genus 03	21	0	0	0	0	0	0	0	0	0	0	0	27	0	0	0	0	0	0	0	0	0	0	0	0	0	0	0	0	0	0	0	0	0	0	0	0	0	0	0	0	0	0	0	0
Bacteria/Fibrobacteres/Chitinivibrionia/Chitinivibrionia Incertae Sedis/Unknown Family/possible genus 02	0	0	0	0	0	0	0	0	0	0	0	0	0	0	0	0	0	0	0	0	0	0	0	0	0	0	0	0	0	0	0	0	0	0	0	0	0	0	0	0	0	0	0	0	0
Bacteria/Fibrobacteres/Fibrobacteria/Fibrobacterales/Fibrobacteraceae/Fibrobacter	0	0	0	0	0	0	0	0	0	0	0	0	0	0	0	0	0	0	0	0	0	0	0	0	0	0	0	0	0	0	0	0	0	0	0	0	0	0	0	0	0	0	0	0	0
Bacteria/Fibrobacteres/Fibrobacteria/Fibrobacterales/Fibrobacteraceae/possible genus 04	0	0	0	0	0	0	0	0	0	0	0	0	0	0	0	0	0	0	0	0	0	0	0	0	0	0	0	0	0	0	0	0	0	0	0	0	0	0	0	0	0	0	0	0	0
Bacteria/Fibrobacteres/Fibrobacteria/Fibrobacterales/Fibrobacteraceae/possible genus 05	0	0	0	0	0	0	0	0	0	0	0	0	0	0	0	0	0	0	0	0	0	0	0	0	0	0	0	0	0	0	0	0	0	0	0	0	0	0	0	0	0	0	0	0	0
Bacteria/Fibrobacteres/Fibrobacteria/Fibrobacterales/Fibrobacteraceae/possible genus 06	0	0	0	0	0	0	0	0	0	0	0	0	0	0	0	0	0	0	0	0	0	0	0	0	0	0	0	0	0	0	0	0	0	0	0	0	0	0	0	0	0	0	0	0	0
Bacteria/Fibrobacteres/Fibrobacteria/Fibrobacterales/Fibrobacteraceae/uncultured	77	31	30	22	21	24	32	18	15	21	15	17	28	41	46	29	17	0	14	22	30	15	29	27	34	47	39	31	21	48	23	13	15	13	11	18	32	33	30	22	17	43	18	31	30
Bacteria/Firmicutes/Bacilli/Bacillales/Alicyclobacillaceae/Acidibacillus	0	0	0	0	0	0	0	0	0	0	0	0	0	0	0	0	0	0	0	0	0	0	0	0	0	0	0	0	0	0	0	0	0	0	0	0	0	0	0	0	0	0	0	0	0
Bacteria/Firmicutes/Bacilli/Bacillales/Alicyclobacillaceae/Alicyclobacillus	0	0	0	0	0	0	0	0	0	0	0	0	0	0	0	0	0	0	0	0	0	0	0	0	0	0	0	0	0	0	0	0	0	0	0	0	0	0	0	0	0	0	0	0	0
Bacteria/Firmicutes/Bacilli/Bacillales/Alicyclobacillaceae/Effusibacillus	0	0	0	0	0	0	0	0	0	0	0	0	0	0	0	0	0	0	0	0	0	0	0	0	0	0	0	0	0	0	0	0	0	0	0	0	0	0	0	0	0	0	0	0	0
Bacteria/Firmicutes/Bacilli/Bacillales/Alicyclobacillaceae/Tumebacillus	0	0	0	0	0	0	0	0	0	0	0	0	0	0	0	0	0	0	0	0	0	0	0	0	0	0	0	0	0	0	0	0	0	0	0	0	0	0	0	0	0	0	0	0	0
Bacteria/Firmicutes/Bacilli/Bacillales/Bacillaceae/Aeribacillus	0	0	0	0	0	0	0	0	0	0	0	0	0	0	0	0	0	0	0	0	0	0	0	0	0	0	0	0	0	0	0	0	0	0	0	0	0	0	0	0	0	0	0	0	0
Bacteria/Firmicutes/Bacilli/Bacillales/Bacillaceae/Alkalibacillus	0	0	0	0	0	0	0	0	0	0	0	0	0	0	0	0	0	0	0	0	0	0	0	0	0	0	0	0	0	0	0	0	0	0	0	0	0	0	0	0	0	0	0	0	0
Bacteria/Firmicutes/Bacilli/Bacillales/Bacillaceae/Allobacillus	0	0	0	0	0	0	0	0	0	0	0	0	0	0	0	0	0	0	0	0	0	0	0	0	0	0	0	0	0	0	0	0	0	0	0	0	0	0	0	0	0	0	0	0	0
Bacteria/Firmicutes/Bacilli/Bacillales/Bacillaceae/Anaerobacillus	0	0	0	0	0	0	0	0	0	0	0	0	0	0	0	0	0	0	0	0	0	0	0	0	0	0	0	0	0	0	0	0	0	0	0	0	0	0	0	0	0	0	0	0	0
Bacteria/Firmicutes/Bacilli/Bacillales/Bacillaceae/Anoxybacillus	0	0	0	0	0	0	0	0	0	0	0	0	0	0	0	0	0	0	0	0	0	0	0	0	0	0	0	0	0	0	0	0	0	0	0	0	0	0	0	0	0	0	0	0	0
Bacteria/Firmicutes/Bacilli/Bacillales/Bacillaceae/Bacillus	300	210	152	170	230	144	323	234	0	229	218	193	198	228	274	198	209	155	218	250	263	154	191	181	197	196	198	275	0	177	0	0	145	252	168	223	258	195	213	162	191	0	244	247	243
Bacteria/Firmicutes/Bacilli/Bacillales/Bacillaceae/Caldalkalibacillus	0	0	0	0	0	0	0	0	0	0	0	0	0	0	0	0	0	0	0	0	0	0	0	0	0	0	0	0	0	0	0	0	0	0	0	0	0	0	0	0	0	0	0	0	0
Bacteria/Firmicutes/Bacilli/Bacillales/Bacillaceae/Calditerricola	0	0	0	0	0	0	0	0	0	0	0	0	0	0	0	0	0	0	0	0	0	0	0	0	0	0	0	0	0	0	0	0	0	0	0	0	0	0	0	0	0	0	0	0	0
Bacteria/Firmicutes/Bacilli/Bacillales/Bacillaceae/Fictibacillus	0	0	0	0	0	0	0	0	0	0	0	0	0	0	0	0	0	0	0	0	0	0	0	0	0	0	0	0	0	0	0	0	0	0	0	0	0	0	0	0	0	0	0	0	0
Bacteria/Firmicutes/Bacilli/Bacillales/Bacillaceae/Geobacillus	0	0	0	0	0	0	0	0	0	0	0	0	0	0	0	0	0	0	0	0	0	0	0	0	0	0	0	0	0	0	0	0	0	0	0	0	0	0	0	0	0	0	0	0	0
Bacteria/Firmicutes/Bacilli/Bacillales/Bacillaceae/Halobacillus	0	0	0	0	0	0	0	0	0	0	0	0	0	0	0	0	0	0	0	0	0	0	0	0	0	0	0	0	0	0	0	0	0	0	0	0	0	0	0	0	0	0	0	0	0
Bacteria/Firmicutes/Bacilli/Bacillales/Bacillaceae/Halolactibacillus	0	0	0	0	0	0	0	0	0	0	0	0	0	0	0	0	0	0	0	0	0	0	0	0	0	0	0	0	0	0	0	0	0	0	0	0	0	0	0	0	0	0	0	0	0
Bacteria/Firmicutes/Bacilli/Bacillales/Bacillaceae/Lentibacillus	0	0	0	0	0	0	0	0	0	0	0	0	0	0	0	0	0	0	0	0	0	0	0	0	0	0	0	0	0	0	0	0	0	0	0	0	0	0	0	0	0	0	0	0	0
Bacteria/Firmicutes/Bacilli/Bacillales/Bacillaceae/Natronobacillus	0	0	0	0	0	0	0	0	0	0	0	0	0	0	0	0	0	0	0	0	0	0	0	0	0	0	0	0	0	0	0	0	0	0	0	0	0	0	0	0	0	0	0	0	0
Bacteria/Firmicutes/Bacilli/Bacillales/Bacillaceae/Oceanobacillus	0	0	0	0	0	0	0	0	0	0	0	0	0	0	0	0	0	0	0	0	0	0	0	0	0	0	0	0	0	0	0	0	0	0	0	0	0	0	0	0	0	0	0	0	0
Bacteria/Firmicutes/Bacilli/Bacillales/Bacillaceae/Pseudogracilibacillus	0	0	0	0	0	0	0	0	0	0	0	0	0	0	0	0	0	0	0	0	0	0	0	0	0	0	0	0	0	0	0	0	0	0	0	0	0	0	0	0	0	0	0	0	0
Bacteria/Firmicutes/Bacilli/Bacillales/Bacillaceae/Saliterribacillus	0	0	0	0	0	0	0	0	0	0	0	0	0	0	0	0	0	0	0	0	0	0	0	0	0	0	0	0	0	0	0	0	0	0	0	0	0	0	0	0	0	0	0	0	0
Bacteria/Firmicutes/Bacilli/Bacillales/Bacillaceae/Salsuginibacillus	0	0	0	0	0	0	0	0	0	0	0	0	0	0	0	0	0	0	0	0	0	0	0	0	0	0	0	0	0	0	0	0	0	0	0	0	0	0	0	0	0	0	0	0	0
Bacteria/Firmicutes/Bacilli/Bacillales/Bacillaceae/Thalassobacillus	0	0	0	0	0	0	0	0	0	0	0	0	0	0	0	0	0	0	0	0	0	0	0	0	0	0	0	0	0	0	0	0	0	0	0	0	0	0	0	0	0	0	0	0	0
Bacteria/Firmicutes/Bacilli/Bacillales/Bacillaceae/uncultured	0	0	0	0	0	0	0	0	0	0	0	0	0	0	0	0	0	0	0	0	0	0	0	0	0	0	0	0	0	0	0	0	0	0	0	0	0	0	0	0	0	0	0	0	0
Bacteria/Firmicutes/Bacilli/Bacillales/Bacillaceae/Virgibacillus	0	0	0	0	0	0	0	0	0	0	0	0	0	0	0	0	0	0	0	0	0	0	0	0	0	0	0	0	0	0	0	0	0	0	0	0	0	0	0	0	0	0	0	0	0
Bacteria/Firmicutes/Bacilli/Bacillales/Bacillaceae/Vulcanibacillus	0	0	0	0	0	0	0	0	0	0	0	0	0	0	0	0	0	0	0	0	0	0	0	0	0	0	0	0	0	0	0	0	0	0	0	0	0	0	0	0	0	0	0	0	0
Bacteria/Firmicutes/Bacilli/Bacillales/Family X/Thermicanus	0	0	0	0	0	0	0	0	0	0	0	0	0	0	0	0	0	0	0	0	0	0	0	0	0	0	0	0	0	0	0	0	0	0	0	0	0	0	0	0	0	0	0	0	0
Bacteria/Firmicutes/Bacilli/Bacillales/Family XI/Gemella	0	0	0	0	0	0	0	0	0	0	0	0	0	0	0	0	0	0	0	0	0	0	0	0	0	0	0	0	0	0	0	0	0	0	0	0	0	0	0	0	0	0	0	0	0
Bacteria/Firmicutes/Bacilli/Bacillales/Family XII/Exiguobacterium	0	0	0	0	0	0	0	0	0	0	0	0	0	0	0	0	0	0	0	0	0	0	0	0	0	0	0	0	0	0	0	0	0	0	0	0	0	0	0	0	0	0	0	0	0
Bacteria/Firmicutes/Bacilli/Bacillales/Listeriaceae/Listeria	0	0	0	0	0	0	0	0	0	0	0	0	0	0	0	0	0	0	0	0	0	0	0	0	0	0	0	0	0	0	0	0	0	0	0	0	0	0	0	0	0	0	0	0	0
Bacteria/Firmicutes/Bacilli/Bacillales/Paenibacillaceae/Ammoniphilus	0	0	0	0	0	0	0	0	0	0	0	0	0	0	0	0	0	0	0	0	0	0	0	0	0	0	0	0	0	0	0	0	0	0	0	0	0	0	0	0	0	0	0	0	0
Bacteria/Firmicutes/Bacilli/Bacillales/Paenibacillaceae/Aneurinibacillus	0	0	0	0	0	0	0	0	0	0	0	0	0	0	0	0	0	0	0	0	0	0	0	0	0	0	0	0	0	0	0	0	0	0	0	0	0	0	0	0	0	0	0	0	0
Bacteria/Firmicutes/Bacilli/Bacillales/Paenibacillaceae/Brevibacillus	0	0	0	0	0	0	0	0	0	0	0	0	0	0	0	0	0	0	0	0	0	0	0	0	0	0	0	0	0	0	0	0	0	0	0	0	0	0	0	0	0	0	0	0	0
Bacteria/Firmicutes/Bacilli/Bacillales/Paenibacillaceae/Cohnella	0	0	0	0	0	0	0	0	0	0	0	0	0	0	0	0	0	0	0	0	0	0	0	0	0	0	0	0	0	0	0	0	0	0	0	0	0	0	0	0	0	0	0	0	0
Bacteria/Firmicutes/Bacilli/Bacillales/Paenibacillaceae/Desulfuribacillus	0	0	0	0	0	0	0	0	0	0	0	0	0	0	0	0	0	0	0	0	0	0	0	0	0	0	0	0	0	0	0	0	0	0	0	0	0	0	0	0	0	0	0	0	0
Bacteria/Firmicutes/Bacilli/Bacillales/Paenibacillaceae/Paenibacillus	0	0	0	0	0	0	0	0	0	0	0	0	0	0	0	0	0	0	0	0	0	0	0	0	0	0	0	0	0	0	0	0	0	0	0	0	0	0	0	0	0	0	0	0	0
Bacteria/Firmicutes/Bacilli/Bacillales/Paenibacillaceae/Thermobacillus	0	0	0	0	0	0	0	0	0	0	0	0	0	0	0	0	0	0	0	0	0	0	0	0	0	0	0	0	0	0	0	0	0	0	0	0	0	0	0	0	0	0	0	0	0
Bacteria/Firmicutes/Bacilli/Bacillales/Paenibacillaceae/uncultured	0	0	0	0	0	0	0	0	0	0	0	0	0	0	0	0	0	0	0	0	0	0	0	0	0	0	0	0	0	0	0	0	0	0	0	0	0	0	0	0	0	0	0	0	0
Bacteria/Firmicutes/Bacilli/Bacillales/Pasteuriaceae/Pasteuria	0	0	0	0	0	0	0	0	0	0	0	0	0	0	0	0	0	0	0	0	0	0	0	0	0	0	0	0	0	0	0	0	0	0	0	0	0	0	0	0	0	0	0	0	0
Bacteria/Firmicutes/Bacilli/Bacillales/Planococcaceae/Kurthia	4735	1492	2032	1506	867	1030	1179	584	770	428	408	323	1514	1502	1657	2020	1242	1018	506	629	424	911	687	982	628	780	878	1119	409	642	527	444	408	861	537	878	983	865	716	572	416	537	490	749	534
Bacteria/Firmicutes/Bacilli/Bacillales/Planococcaceae/Lysinibacillus	0	0	0	0	0	0	0	0	0	0	0	0	0	0	0	0	0	0	0	0	0	0	0	0	0	0	0	0	0	0	0	0	0	0	0	0	0	0	0	0	0	0	0	0	0
Bacteria/Firmicutes/Bacilli/Bacillales/Planococcaceae/Planococcus	0	0	0	0	0	0	0	0	0	0	0	0	0	0	0	0	0	0	0	0	0	0	0	0	0	0	0	0	0	0	0	0	0	0	0	0	0	0	0	0	0	0	0	0	0
Bacteria/Firmicutes/Bacilli/Bacillales/Planococcaceae/Planomicrobium	0	0	0	0	0	0	0	0	0	0	0	0	0	0	0	0	0	0	0	0	0	0	0	0	0	0	0	0	0	0	0	0	0	0	0	0	0	0	0	0	0	0	0	0	0
Bacteria/Firmicutes/Bacilli/Bacillales/Planococcaceae/Rummeliibacillus	0	0	0	0	0	0	0	0	0	0	0	0	0	0	0	0	0	0	0	0	0	0	0	0	0	0	0	0	0	0	0	0	0	0	0	0	0	0	0	0	0	0	0	0	0
Bacteria/Firmicutes/Bacilli/Bacillales/Planococcaceae/Savagea	0	0	0	0	0	0	0	0	0	0	0	0	0	0	0	0	0	0	0	0	0	0	0	0	0	0	0	0	0	0	0	0	0	0	0	0	0	0	0	0	0	0	0	0	0
Bacteria/Firmicutes/Bacilli/Bacillales/Planococcaceae/Solibacillus	0	0	0	0	0	0	0	0	0	0	0	0	0	0	0	0	0	0	0	0	0	0	0	0	0	0	0	0	0	0	0	0	0	0	0	0	0	0	0	0	0	0	0	0	0
Bacteria/Firmicutes/Bacilli/Bacillales/Planococcaceae/Sporosarcina	0	0	0	0	0	0	0	0	0	0	0	0	0	0	0	0	0	0	0	0	0	0	0	0	0	0	0	0	0	0	0	0	0	0	0	0	0	0	0	0	0	0	0	0	0
Bacteria/Firmicutes/Bacilli/Bacillales/Planococcaceae/uncultured	0	0	0	0	0	0	0	0	0	0	0	0	0	0	0	0	0	0	0	0	0	0	0	0	0	0	0	0	0	0	0	0	0	0	0	0	0	0	0	0	0	0	0	0	0
Bacteria/Firmicutes/Bacilli/Bacillales/Sporolactobacillaceae/Alkalicoccus	0	0	0	0	0	0	0	0	0	0	0	0	0	0	0	0	0	0	0	0	0	0	0	0	0	0	0	0	0	0	0	0	0	0	0	0	0	0	0	0	0	0	0	0	0
Bacteria/Firmicutes/Bacilli/Bacillales/Sporolactobacillaceae/Salipaludibacillus	0	0	0	0	0	0	0	0	0	0	0	0	0	0	0	0	0	0	0	0	0	0	0	0	0	0	0	0	0	0	0	0	0	0	0	0	0	0	0	0	0	0	0	0	0
Bacteria/Firmicutes/Bacilli/Bacillales/Sporolactobacillaceae/Salisediminibacterium	0	0	0	0	0	0	0	0	0	0	0	0	0	0	0	0	0	0	0	0	0	0	0	0	0	0	0	0	0	0	0	0	0	0	0	0	0	0	0	0	0	0	0	0	0
Bacteria/Firmicutes/Bacilli/Bacillales/Sporolactobacillaceae/Sporolactobacillus	0	0	0	0	0	0	0	0	0	0	0	0	0	0	0	0	0	0	0	0	0	0	0	0	0	0	0	0	0	0	0	0	0	0	0	0	0	0	0	0	0	0	0	0	0
Bacteria/Firmicutes/Bacilli/Bacillales/Sporolactobacillaceae/Texcoconibacillus	0	0	0	0	0	0	0	0	0	0	0	0	0	0	0	0	0	0	0	0	0	0	0	0	0	0	0	0	0	0	0	0	0	0	0	0	0	0	0	0	0	0	0	0	0
Bacteria/Firmicutes/Bacilli/Bacillales/Staphylococcaceae/Jeotgalicoccus	0	0	0	0	0	0	0	0	0	0	0	0	0	0	0	0	0	0	0	0	0	0	0	0	0	0	0	0	0	0	0	0	0	0	0	0	0	0	0	0	0	0	0	0	0
Bacteria/Firmicutes/Bacilli/Bacillales/Staphylococcaceae/Salinicoccus	0	0	0	0	0	0	0	0	0	0	0	0	0	0	0	0	0	0	0	0	0	0	0	0	0	0	0	0	0	0	0	0	0	0	0	0	0	0	0	0	0	0	0	0	0
Bacteria/Firmicutes/Bacilli/Bacillales/Staphylococcaceae/Staphylococcus	0	0	0	0	0	0	0	0	0	0	0	0	0	0	0	0	0	0	0	0	0	0	0	0	0	0	0	0	0	0	0	0	0	0	0	0	0	0	0	0	0	0	0	0	0
Bacteria/Firmicutes/Bacilli/Bacillales/Thermoactinomycetaceae/Baia	0	0	0	0	0	0	0	0	0	0	0	0	0	0	0	0	0	0	0	0	0	0	0	0	0	0	0	0	0	0	0	0	0	0	0	0	0	0	0	0	0	0	0	0	0
Bacteria/Firmicutes/Bacilli/Bacillales/Thermoactinomycetaceae/Kroppenstedtia	0	0	0	0	0	0	0	0	0	0	0	0	0	0	0	0	0	0	0	0	0	0	0	0	0	0	0	0	0	0	0	0	0	0	0	0	0	0	0	0	0	0	0	0	0
Bacteria/Firmicutes/Bacilli/Bacillales/Thermoactinomycetaceae/Lihuaxuella	0	0	0	0	0	0	0	0	0	0	0	0	0	0	0	0	0	0	0	0	0	0	0	0	0	0	0	0	0	0	0	0	0	0	0	0	0	0	0	0	0	0	0	0	0
Bacteria/Firmicutes/Bacilli/Bacillales/Thermoactinomycetaceae/Melghirimyces	0	0	0	0	0	0	0	0	0	0	0	0	0	0	0	0	0	0	0	0	0	0	0	0	0	0	0	0	0	0	0	0	0	0	0	0	0	0	0	0	0	0	0	0	0
Bacteria/Firmicutes/Bacilli/Bacillales/Thermoactinomycetaceae/Planifilum	0	0	0	0	0	0	0	0	0	0	0	0	0	0	0	0	0	0	0	0	0	0	0	0	0	0	0	0	0	0	0	0	0	0	0	0	0	0	0	0	0	0	0	0	0
Bacteria/Firmicutes/Bacilli/Bacillales/Thermoactinomycetaceae/Risungbinella	0	0	0	0	0	0	0	0	0	0	0	0	0	0	0	0	0	0	0	0	0	0	0	0	0	0	0	0	0	0	0	0	0	0	0	0	0	0	0	0	0	0	0	0	0
Bacteria/Firmicutes/Bacilli/Bacillales/Thermoactinomycetaceae/Thermoactinomyces	0	0	0	0	0	0	0	0	0	0	0	0	0	0	0	0	0	0	0	0	0	0	0	0	0	0	0	0	0	0	0	0	0	0	0	0	0	0	0	0	0	0	0	0	0
Bacteria/Firmicutes/Bacilli/Bacillales/Thermoactinomycetaceae/Thermoflavimicrobium	0	0	0	0	0	0	0	0	0	0	0	0	0	0	0	0	0	0	0	0	0	0	0	0	0	0	0	0	0	0	0	0	0	0	0	0	0	0	0	0	0	0	0	0	0
Bacteria/Firmicutes/Bacilli/Bacillales/Thermoactinomycetaceae/uncultured	0	0	0	0	0	0	0	0	0	0	0	0	0	0	0	0	0	0	0	0	0	0	0	0	0	0	0	0	0	0	0	0	0	0	0	0	0	0	0	0	0	0	0	0	0
Bacteria/Firmicutes/Bacilli/Lactobacillales/Aerococcaceae/Abiotrophia	0	0	0	0	0	0	0	0	0	0	0	0	0	0	0	0	0	0	0	0	0	0	0	0	0	0	0	0	0	0	0	0	0	0	0	0	0	0	0	0	0	0	0	0	0
Bacteria/Firmicutes/Bacilli/Lactobacillales/Aerococcaceae/Aerococcus	0	0	0	0	0	0	0	0	0	0	0	0	0	0	0	0	0	0	0	0	0	0	0	0	0	0	0	0	0	0	0	0	0	0	0	0	0	0	0	0	0	0	0	0	0
Bacteria/Firmicutes/Bacilli/Lactobacillales/Carnobacteriaceae/Allofustis	0	0	0	0	0	0	0	0	0	0	0	0	0	0	0	0	0	0	0	0	0	0	0	0	0	0	0	0	0	0	0	0	0	0	0	0	0	0	0	0	0	0	0	0	0
Bacteria/Firmicutes/Bacilli/Lactobacillales/Carnobacteriaceae/Alloiococcus	0	0	0	0	0	0	0	0	0	0	0	0	0	0	0	0	0	0	0	0	0	0	0	0	0	0	0	0	0	0	0	0	0	0	0	0	0	0	0	0	0	0	0	0	0
Bacteria/Firmicutes/Bacilli/Lactobacillales/Carnobacteriaceae/Atopostipes	0	0	0	0	0	0	0	0	0	0	0	0	0	0	0	0	0	0	0	0	0	0	0	0	0	0	0	0	0	0	0	0	0	0	0	0	0	0	0	0	0	0	0	0	0
Bacteria/Firmicutes/Bacilli/Lactobacillales/Carnobacteriaceae/Carnobacterium	0	0	0	0	0	0	0	0	0	0	0	0	0	0	0	0	0	0	0	0	0	0	0	0	0	0	0	0	0	0	0	0	0	0	0	0	0	0	0	0	0	0	0	0	0
Bacteria/Firmicutes/Bacilli/Lactobacillales/Carnobacteriaceae/Desemzia	0	0	0	0	0	0	0	0	0	0	0	0	0	0	0	0	0	0	0	0	0	0	0	0	0	0	0	0	0	0	0	0	0	0	0	0	0	0	0	0	0	0	0	0	0
Bacteria/Firmicutes/Bacilli/Lactobacillales/Carnobacteriaceae/Dolosigranulum	0	0	0	0	0	0	0	0	0	0	0	0	0	0	0	0	0	0	0	0	0	0	0	0	0	0	0	0	0	0	0	0	0	0	0	0	0	0	0	0	0	0	0	0	0
Bacteria/Firmicutes/Bacilli/Lactobacillales/Carnobacteriaceae/Granulicatella	0	0	0	0	0	0	0	0	0	0	0	0	0	0	0	0	0	0	0	0	0	0	0	0	0	0	0	0	0	0	0	0	0	0	0	0	0	0	0	0	0	0	0	0	0
Bacteria/Firmicutes/Bacilli/Lactobacillales/Carnobacteriaceae/Jeotgalibaca	0	0	0	0	0	0	0	0	0	0	0	0	0	0	0	0	0	0	0	0	0	0	0	0	0	0	0	0	0	0	0	0	0	0	0	0	0	0	0	0	0	0	0	0	0
Bacteria/Firmicutes/Bacilli/Lactobacillales/Carnobacteriaceae/uncultured	0	0	0	0	0	0	0	0	0	0	0	0	0	0	0	0	0	0	0	0	0	0	0	0	0	0	0	0	0	0	0	0	0	0	0	0	0	0	0	0	0	0	0	0	0
Bacteria/Firmicutes/Bacilli/Lactobacillales/Enterococcaceae/Catellicoccus	0	0	0	0	0	0	0	0	0	0	0	0	0	0	0	0	0	0	0	0	0	0	0	0	0	0	0	0	0	0	0	0	0	0	0	0	0	0	0	0	0	0	0	0	0
Bacteria/Firmicutes/Bacilli/Lactobacillales/Enterococcaceae/Enterococcus	275	0	152	0	0	0	0	0	0	0	0	0	0	0	0	0	0	0	0	0	0	0	0	0	0	0	0	0	0	0	0	0	0	0	0	0	0	0	0	0	0	0	0	0	0
Bacteria/Firmicutes/Bacilli/Lactobacillales/Enterococcaceae/Tetragenococcus	0	0	0	0	0	0	0	0	0	0	0	0	0	0	0	0	0	0	0	0	0	0	0	0	0	0	0	0	0	0	0	0	0	0	0	0	0	0	0	0	0	0	0	0	0
Bacteria/Firmicutes/Bacilli/Lactobacillales/Lactobacillaceae/Lactobacillus	0	0	0	0	0	0	0	0	0	0	0	0	0	0	0	0	0	0	0	0	0	0	0	0	0	0	0	0	0	0	0	0	0	0	0	0	0	0	0	0	0	0	0	0	0
Bacteria/Firmicutes/Bacilli/Lactobacillales/Lactobacillaceae/Pediococcus	0	0	0	0	0	0	0	0	0	0	0	0	0	0	0	0	0	0	0	0	0	0	0	0	0	0	0	0	0	0	0	0	0	0	0	0	0	0	0	0	0	0	0	0	0
Bacteria/Firmicutes/Bacilli/Lactobacillales/Leuconostocaceae/Leuconostoc	0	0	0	0	0	0	0	0	0	0	0	0	0	0	0	0	0	0	0	0	0	0	0	0	0	0	0	0	0	0	0	0	0	0	0	0	0	0	0	0	0	0	0	0	0
Bacteria/Firmicutes/Bacilli/Lactobacillales/Leuconostocaceae/Oenococcus	0	0	0	0	0	0	0	0	0	0	0	0	0	0	0	0	0	0	0	0	0	0	0	0	0	0	0	0	0	0	0	0	0	0	0	0	0	0	0	0	0	0	0	0	0
Bacteria/Firmicutes/Bacilli/Lactobacillales/Leuconostocaceae/Weissella	0	0	0	0	0	0	0	0	0	0	0	0	0	0	0	0	0	0	0	0	0	0	0	0	0	0	0	0	0	0	0	0	0	0	0	0	0	0	0	0	0	0	0	0	0
Bacteria/Firmicutes/Bacilli/Lactobacillales/Streptococcaceae/Lactococcus	0	0	0	0	0	0	0	0	0	0	0	0	0	0	0	0	0	0	0	0	0	0	0	0	0	0	0	0	0	0	0	0	0	0	0	0	0	0	0	0	0	0	0	0	0
Bacteria/Firmicutes/Bacilli/Lactobacillales/Streptococcaceae/Lactovum	0	0	0	0	0	0	0	0	0	0	0	0	0	0	0	0	0	0	0	0	0	0	0	0	0	0	0	0	0	0	0	0	0	0	0	0	0	0	0	0	0	0	0	0	0
Bacteria/Firmicutes/Bacilli/Lactobacillales/Streptococcaceae/Streptococcus	210	0	0	0	0	0	0	0	0	0	0	0	0	0	0	0	0	0	0	0	0	0	0	0	0	0	0	0	0	0	0	0	0	0	0	0	0	0	0	0	0	0	0	0	0
Bacteria/Firmicutes/Clostridia/Clostridia Incertae Sedis/Unknown Family/Candidatus Desulforudis	0	0	0	0	0	0	0	0	0	0	0	0	0	0	0	0	0	0	0	0	0	0	0	0	0	0	0	0	0	0	0	0	0	0	0	0	0	0	0	0	0	0	0	0	0
Bacteria/Firmicutes/Clostridia/Clostridiales/Caldicoprobacteraceae/Caldicoprobacter	0	0	0	0	0	0	0	0	0	0	0	0	0	0	0	0	0	0	0	0	0	0	0	0	0	0	0	0	0	0	0	0	0	0	0	0	0	0	0	0	0	0	0	0	0
Bacteria/Firmicutes/Clostridia/Clostridiales/Christensenellaceae/Christensenellaceae R-7 group	0	0	0	0	0	0	0	0	0	0	0	0	0	0	0	0	0	0	0	0	0	0	0	0	0	0	0	0	0	0	0	0	0	0	0	0	0	0	0	0	0	0	0	0	0
Bacteria/Firmicutes/Clostridia/Clostridiales/Christensenellaceae/uncultured	0	0	0	0	0	0	0	0	0	0	0	0	0	0	0	0	0	0	0	0	0	0	0	0	0	0	0	0	0	0	0	0	0	0	0	0	0	0	0	0	0	0	0	0	0
Bacteria/Firmicutes/Clostridia/Clostridiales/Clostridiaceae 1/Caloramator	0	0	0	0	0	0	0	0	0	0	0	0	0	0	0	0	0	0	0	0	0	0	0	0	0	0	0	0	0	0	0	0	0	0	0	0	0	0	0	0	0	0	0	0	0
Bacteria/Firmicutes/Clostridia/Clostridiales/Clostridiaceae 1/Candidatus Arthromitus	0	0	0	0	0	0	0	0	0	0	0	0	0	0	0	0	0	0	0	0	0	0	0	0	0	0	0	0	0	0	0	0	0	0	0	0	0	0	0	0	0	0	0	0	0
Bacteria/Firmicutes/Clostridia/Clostridiales/Clostridiaceae 1/Clostridium sensu stricto 1	0	0	0	0	0	0	0	0	0	0	0	0	0	0	0	0	0	0	0	0	0	0	0	0	0	0	0	0	0	0	0	0	0	0	0	0	0	0	0	0	0	0	0	0	0
Bacteria/Firmicutes/Clostridia/Clostridiales/Clostridiaceae 1/Clostridium sensu stricto 10	0	0	0	0	0	0	0	0	0	0	0	0	0	0	0	0	0	0	0	0	0	0	0	0	0	0	0	0	0	0	0	0	0	0	0	0	0	0	0	0	0	0	0	0	0
Bacteria/Firmicutes/Clostridia/Clostridiales/Clostridiaceae 1/Clostridium sensu stricto 11	0	0	0	0	0	0	0	0	0	0	0	0	0	0	0	0	0	0	0	0	0	0	0	0	0	0	0	0	0	0	0	0	0	0	0	0	0	0	0	0	0	0	0	0	0
Bacteria/Firmicutes/Clostridia/Clostridiales/Clostridiaceae 1/Clostridium sensu stricto 12	0	0	0	0	0	0	0	0	0	0	0	0	0	0	0	0	0	0	0	0	0	0	0	0	0	0	0	0	0	0	0	0	0	0	0	0	0	0	0	0	0	0	0	0	0
Bacteria/Firmicutes/Clostridia/Clostridiales/Clostridiaceae 1/Clostridium sensu stricto 13	0	0	0	0	0	0	0	0	0	0	0	0	0	0	0	0	0	0	0	0	0	0	0	0	0	0	0	0	0	0	0	0	0	0	0	0	0	0	0	0	0	0	0	0	0
Bacteria/Firmicutes/Clostridia/Clostridiales/Clostridiaceae 1/Clostridium sensu stricto 14	0	0	0	0	0	0	0	0	0	0	0	0	0	0	0	0	0	0	0	0	0	0	0	0	0	0	0	0	0	0	0	0	0	0	0	0	0	0	0	0	0	0	0	0	0
Bacteria/Firmicutes/Clostridia/Clostridiales/Clostridiaceae 1/Clostridium sensu stricto 15	0	0	0	0	0	0	0	0	0	0	0	0	0	0	0	0	0	0	0	0	0	0	0	0	0	0	0	0	0	0	0	0	0	0	0	0	0	0	0	0	0	0	0	0	0
Bacteria/Firmicutes/Clostridia/Clostridiales/Clostridiaceae 1/Clostridium sensu stricto 16	0	0	0	0	0	0	0	0	0	0	0	0	0	0	0	0	0	0	0	0	0	0	0	0	0	0	0	0	0	0	0	0	0	0	0	0	0	0	0	0	0	0	0	0	0
Bacteria/Firmicutes/Clostridia/Clostridiales/Clostridiaceae 1/Clostridium sensu stricto 17	0	0	0	0	0	0	0	0	0	0	0	0	0	0	0	0	0	0	0	0	0	0	0	0	0	0	0	0	0	0	0	0	0	0	0	0	0	0	0	0	0	0	0	0	0
Bacteria/Firmicutes/Clostridia/Clostridiales/Clostridiaceae 1/Clostridium sensu stricto 18	0	0	0	0	0	0	0	0	0	0	0	0	0	0	0	0	0	0	0	0	0	0	0	0	0	0	0	0	0	0	0	0	0	0	0	0	0	0	0	0	0	0	0	0	0
Bacteria/Firmicutes/Clostridia/Clostridiales/Clostridiaceae 1/Clostridium sensu stricto 19	0	0	0	0	0	0	0	0	0	0	0	0	0	0	0	0	0	0	0	0	0	0	0	0	0	0	0	0	0	0	0	0	0	0	0	0	0	0	0	0	0	0	0	0	0
Bacteria/Firmicutes/Clostridia/Clostridiales/Clostridiaceae 1/Clostridium sensu stricto 2	0	0	0	0	0	0	0	0	0	0	0	0	0	0	0	0	0	0	0	0	0	0	0	0	0	0	0	0	0	0	0	0	0	0	0	0	0	0	0	0	0	0	0	0	0
Bacteria/Firmicutes/Clostridia/Clostridiales/Clostridiaceae 1/Clostridium sensu stricto 3	0	0	0	0	0	0	0	0	0	0	0	0	0	0	0	0	0	0	0	0	0	0	0	0	0	0	0	0	0	0	0	0	0	0	0	0	0	0	0	0	0	0	0	0	0
Bacteria/Firmicutes/Clostridia/Clostridiales/Clostridiaceae 1/Clostridium sensu stricto 5	0	0	0	0	0	0	0	0	0	0	0	0	0	0	0	0	0	0	0	0	0	0	0	0	0	0	0	0	0	0	0	0	0	0	0	0	0	0	0	0	0	0	0	0	0
Bacteria/Firmicutes/Clostridia/Clostridiales/Clostridiaceae 1/Clostridium sensu stricto 6	0	0	0	0	0	0	0	0	0	0	0	0	0	0	0	0	0	0	0	0	0	0	0	0	0	0	0	0	0	0	0	0	0	0	0	0	0	0	0	0	0	0	0	0	0
Bacteria/Firmicutes/Clostridia/Clostridiales/Clostridiaceae 1/Clostridium sensu stricto 7	0	0	0	0	0	0	0	0	0	0	0	0	0	0	0	0	0	0	0	0	0	0	0	0	0	0	0	0	0	0	0	0	0	0	0	0	0	0	0	0	0	0	0	0	0
Bacteria/Firmicutes/Clostridia/Clostridiales/Clostridiaceae 1/Clostridium sensu stricto 8	0	0	0	0	0	0	0	0	0	0	0	0	0	0	0	0	0	0	0	0	0	0	0	0	0	0	0	0	0	0	0	0	0	0	0	0	0	0	0	0	0	0	0	0	0
Bacteria/Firmicutes/Clostridia/Clostridiales/Clostridiaceae 1/Clostridium sensu stricto 9	0	0	0	0	0	0	0	0	0	0	0	0	0	0	0	0	0	0	0	0	0	0	0	0	0	0	0	0	0	0	0	0	0	0	0	0	0	0	0	0	0	0	0	0	0
Bacteria/Firmicutes/Clostridia/Clostridiales/Clostridiaceae 1/Fervidicella	0	0	0	0	0	0	0	0	0	0	0	0	0	0	0	0	0	0	0	0	0	0	0	0	0	0	0	0	0	0	0	0	0	0	0	0	0	0	0	0	0	0	0	0	0
Bacteria/Firmicutes/Clostridia/Clostridiales/Clostridiaceae 1/Fonticella	0	0	0	0	0	0	0	0	0	0	0	0	0	0	0	0	0	0	0	0	0	0	0	0	0	0	0	0	0	0	0	0	0	0	0	0	0	0	0	0	0	0	0	0	0
Bacteria/Firmicutes/Clostridia/Clostridiales/Clostridiaceae 1/Haloimpatiens	0	0	0	0	0	0	0	0	0	0	0	0	0	0	0	0	0	0	0	0	0	0	0	0	0	0	0	0	0	0	0	0	0	0	0	0	0	0	0	0	0	0	0	0	0
Bacteria/Firmicutes/Clostridia/Clostridiales/Clostridiaceae 1/Hathewaya	0	0	0	0	0	0	0	0	0	0	0	0	0	0	0	0	0	0	0	0	0	0	0	0	0	0	0	0	0	0	0	0	0	0	0	0	0	0	0	0	0	0	0	0	0
Bacteria/Firmicutes/Clostridia/Clostridiales/Clostridiaceae 1/Oceanirhabdus	0	0	0	0	0	0	0	0	0	0	0	0	0	0	0	0	0	0	0	0	0	0	0	0	0	0	0	0	0	0	0	0	0	0	0	0	0	0	0	0	0	0	0	0	0
Bacteria/Firmicutes/Clostridia/Clostridiales/Clostridiaceae 1/Oxobacter	0	0	0	0	0	0	0	0	0	0	0	0	0	0	0	0	0	0	0	0	0	0	0	0	0	0	0	0	0	0	0	0	0	0	0	0	0	0	0	0	0	0	0	0	0
Bacteria/Firmicutes/Clostridia/Clostridiales/Clostridiaceae 1/Proteiniclasticum	0	0	0	0	0	0	0	0	0	0	0	0	0	0	0	0	0	0	0	0	0	0	0	0	0	0	0	0	0	0	0	0	0	0	0	0	0	0	0	0	0	0	0	0	0
Bacteria/Firmicutes/Clostridia/Clostridiales/Clostridiaceae 1/Sarcina	0	0	0	0	0	0	0	0	0	0	0	0	0	0	0	0	0	0	0	0	0	0	0	0	0	0	0	0	0	0	0	0	0	0	0	0	0	0	0	0	0	0	0	0	0
Bacteria/Firmicutes/Clostridia/Clostridiales/Clostridiaceae 1/Thermobrachium	0	0	0	0	0	0	0	0	0	0	0	0	0	0	0	0	0	0	0	0	0	0	0	0	0	0	0	0	0	0	0	0	0	0	0	0	0	0	0	0	0	0	0	0	0
Bacteria/Firmicutes/Clostridia/Clostridiales/Clostridiaceae 1/uncultured	0	0	0	0	0	0	0	0	0	0	0	0	0	0	0	0	0	0	0	0	0	0	0	0	0	0	0	0	0	0	0	0	0	0	0	0	0	0	0	0	0	0	0	0	0
Bacteria/Firmicutes/Clostridia/Clostridiales/Clostridiaceae 2/Alkaliphilus	0	0	0	0	0	0	0	0	0	0	0	0	0	0	0	0	0	0	0	0	0	0	0	0	0	0	0	0	0	0	0	0	0	0	0	0	0	0	0	0	0	0	0	0	0
Bacteria/Firmicutes/Clostridia/Clostridiales/Clostridiaceae 2/Anoxynatronum	0	0	0	0	0	0	0	0	0	0	0	0	0	0	0	0	0	0	0	0	0	0	0	0	0	0	0	0	0	0	0	0	0	0	0	0	0	0	0	0	0	0	0	0	0
Bacteria/Firmicutes/Clostridia/Clostridiales/Clostridiaceae 2/Serpentinicella	0	0	0	0	0	0	0	0	0	0	0	0	0	0	0	0	0	0	0	0	0	0	0	0	0	0	0	0	0	0	0	0	0	0	0	0	0	0	0	0	0	0	0	0	0
Bacteria/Firmicutes/Clostridia/Clostridiales/Clostridiaceae 2/Tindallia	0	0	0	0	0	0	0	0	0	0	0	0	0	0	0	0	0	0	0	0	0	0	0	0	0	0	0	0	0	0	0	0	0	0	0	0	0	0	0	0	0	0	0	0	0
Bacteria/Firmicutes/Clostridia/Clostridiales/Clostridiaceae 3/Caloranaerobacter	0	0	0	0	0	0	0	0	0	0	0	0	0	0	0	0	0	0	0	0	0	0	0	0	0	0	0	0	0	0	0	0	0	0	0	0	0	0	0	0	0	0	0	0	0
Bacteria/Firmicutes/Clostridia/Clostridiales/Clostridiaceae 3/Clostridiisalibacter	0	0	0	0	0	0	0	0	0	0	0	0	0	0	0	0	0	0	0	0	0	0	0	0	0	0	0	0	0	0	0	0	0	0	0	0	0	0	0	0	0	0	0	0	0
Bacteria/Firmicutes/Clostridia/Clostridiales/Clostridiaceae 3/MCWD3	0	0	0	0	0	0	0	0	0	0	0	0	0	0	0	0	0	0	0	0	0	0	0	0	0	0	0	0	0	0	0	0	0	0	0	0	0	0	0	0	0	0	0	0	0
Bacteria/Firmicutes/Clostridia/Clostridiales/Clostridiaceae 3/Sporosalibacterium	0	0	0	0	0	0	0	0	0	0	0	0	0	0	0	0	0	0	0	0	0	0	0	0	0	0	0	0	0	0	0	0	0	0	0	0	0	0	0	0	0	0	0	0	0
Bacteria/Firmicutes/Clostridia/Clostridiales/Clostridiaceae 3/uncultured	0	0	0	0	0	0	0	0	0	0	0	0	0	0	0	0	0	0	0	0	0	0	0	0	0	0	0	0	0	0	0	0	0	0	0	0	0	0	0	0	0	0	0	0	0
Bacteria/Firmicutes/Clostridia/Clostridiales/Clostridiaceae 4/Anaerosolibacter	0	0	0	0	0	0	0	0	0	0	0	0	0	0	0	0	0	0	0	0	0	0	0	0	0	0	0	0	0	0	0	0	0	0	0	0	0	0	0	0	0	0	0	0	0
Bacteria/Firmicutes/Clostridia/Clostridiales/Clostridiaceae 4/Caminicella	0	0	0	0	0	0	0	0	0	0	0	0	0	0	0	0	0	0	0	0	0	0	0	0	0	0	0	0	0	0	0	0	0	0	0	0	0	0	0	0	0	0	0	0	0
Bacteria/Firmicutes/Clostridia/Clostridiales/Clostridiaceae 4/Crassaminicella	0	0	0	0	0	0	0	0	0	0	0	0	0	0	0	0	0	0	0	0	0	0	0	0	0	0	0	0	0	0	0	0	0	0	0	0	0	0	0	0	0	0	0	0	0
Bacteria/Firmicutes/Clostridia/Clostridiales/Clostridiaceae 4/Geosporobacter	0	0	0	0	0	0	0	0	0	0	0	0	0	0	0	0	0	0	0	0	0	0	0	0	0	0	0	0	0	0	0	0	0	0	0	0	0	0	0	0	0	0	0	0	0
Bacteria/Firmicutes/Clostridia/Clostridiales/Clostridiaceae 4/Paramaledivibacter	0	0	0	0	0	0	0	0	0	0	0	0	0	0	0	0	0	0	0	0	0	0	0	0	0	0	0	0	0	0	0	0	0	0	0	0	0	0	0	0	0	0	0	0	0
Bacteria/Firmicutes/Clostridia/Clostridiales/Clostridiaceae 4/Thermotalea	0	0	0	0	0	0	0	0	0	0	0	0	0	0	0	0	0	0	0	0	0	0	0	0	0	0	0	0	0	0	0	0	0	0	0	0	0	0	0	0	0	0	0	0	0
Bacteria/Firmicutes/Clostridia/Clostridiales/Clostridiaceae/Anaeromicrobium	0	0	0	0	0	0	0	0	0	0	0	0	0	0	0	0	0	0	0	0	0	0	0	0	0	0	0	0	0	0	0	0	0	0	0	0	0	0	0	0	0	0	0	0	0
Bacteria/Firmicutes/Clostridia/Clostridiales/Clostridiales Incertae Sedis/Dethiosulfatibacter	0	0	0	0	0	0	0	0	0	0	0	0	0	0	0	0	0	0	0	0	0	0	0	0	0	0	0	0	0	0	0	0	0	0	0	0	0	0	0	0	0	0	0	0	0
Bacteria/Firmicutes/Clostridia/Clostridiales/Clostridiales Incertae Sedis/Proteiniborus	0	0	0	0	0	0	0	0	0	0	0	0	0	0	0	0	0	0	0	0	0	0	0	0	0	0	0	0	0	0	0	0	0	0	0	0	0	0	0	0	0	0	0	0	0
Bacteria/Firmicutes/Clostridia/Clostridiales/Defluviitaleaceae/Defluviitalea	0	0	0	0	0	0	0	0	0	0	0	0	0	0	0	0	0	0	0	0	0	0	0	0	0	0	0	0	0	0	0	0	0	0	0	0	0	0	0	0	0	0	0	0	0
Bacteria/Firmicutes/Clostridia/Clostridiales/Defluviitaleaceae/Defluviitaleaceae UCG-011	0	0	0	0	0	0	0	0	0	0	0	0	25	0	0	0	0	0	0	0	0	0	0	0	0	0	0	0	0	0	0	0	0	0	0	0	0	0	0	0	0	0	0	0	0
Bacteria/Firmicutes/Clostridia/Clostridiales/Eubacteriaceae/Acetobacterium	0	0	0	0	0	0	0	0	0	0	0	0	0	0	0	0	0	0	0	0	0	0	0	0	0	0	0	0	0	0	0	0	0	0	0	0	0	0	0	0	0	0	0	0	0
Bacteria/Firmicutes/Clostridia/Clostridiales/Eubacteriaceae/Alkalibacter	0	0	0	0	0	0	0	0	0	0	0	0	0	0	0	0	0	0	0	0	0	0	0	0	0	0	0	0	0	0	0	0	0	0	0	0	0	0	0	0	0	0	0	0	0
Bacteria/Firmicutes/Clostridia/Clostridiales/Eubacteriaceae/Anaerofustis	0	0	0	0	0	0	0	0	0	0	0	0	0	0	0	0	0	0	0	0	0	0	0	0	0	0	0	0	0	0	0	0	0	0	0	0	0	0	0	0	0	0	0	0	0
Bacteria/Firmicutes/Clostridia/Clostridiales/Eubacteriaceae/Eubacterium	0	0	0	0	0	0	0	0	0	0	0	0	0	0	0	0	0	0	0	0	0	0	0	0	0	0	0	0	0	0	0	0	0	0	0	0	0	0	0	0	0	0	0	0	0
Bacteria/Firmicutes/Clostridia/Clostridiales/Eubacteriaceae/Garciella	0	0	0	0	0	0	0	0	0	0	0	0	0	0	0	0	0	0	0	0	0	0	0	0	0	0	0	0	0	0	0	0	0	0	0	0	0	0	0	0	0	0	0	0	0
Bacteria/Firmicutes/Clostridia/Clostridiales/Eubacteriaceae/Pseudoramibacter	0	0	0	0	0	0	0	0	0	0	0	0	0	0	0	0	0	0	0	0	0	0	0	0	0	0	0	0	0	0	0	0	0	0	0	0	0	0	0	0	0	0	0	0	0
Bacteria/Firmicutes/Clostridia/Clostridiales/Eubacteriaceae/uncultured	0	0	0	0	0	0	0	0	0	0	0	0	0	0	0	0	0	0	0	0	0	0	0	0	0	0	0	0	0	0	0	0	0	0	0	0	0	0	0	0	0	0	0	0	0
Bacteria/Firmicutes/Clostridia/Clostridiales/Family XI/Anaerococcus	0	0	0	0	0	0	0	0	0	0	0	0	0	0	0	0	0	0	0	0	0	0	0	0	0	0	0	0	0	0	0	0	0	0	0	0	0	0	0	0	0	0	0	0	0
Bacteria/Firmicutes/Clostridia/Clostridiales/Family XI/Ezakiella	0	0	0	0	0	0	0	0	0	0	0	0	0	0	0	0	0	0	0	0	0	0	0	0	0	0	0	0	0	0	0	0	0	0	0	0	0	0	0	0	0	0	0	0	0
Bacteria/Firmicutes/Clostridia/Clostridiales/Family XI/Finegoldia	0	0	0	0	0	0	0	0	0	0	0	0	0	0	0	0	0	0	0	0	0	0	0	0	0	0	0	0	0	0	0	0	0	0	0	0	0	0	0	0	0	0	0	0	0
Bacteria/Firmicutes/Clostridia/Clostridiales/Family XI/Gallicola	0	0	0	0	0	0	0	0	0	0	0	0	0	0	0	0	0	0	0	0	0	0	0	0	0	0	0	0	0	0	0	0	0	0	0	0	0	0	0	0	0	0	0	0	0
Bacteria/Firmicutes/Clostridia/Clostridiales/Family XI/Gottschalkia	0	0	0	0	0	0	0	0	0	0	0	0	0	0	0	0	0	0	0	0	0	0	0	0	0	0	0	0	0	0	0	0	0	0	0	0	0	0	0	0	0	0	0	0	0
Bacteria/Firmicutes/Clostridia/Clostridiales/Family XI/Helcococcus	0	0	0	0	0	0	0	0	0	0	0	0	0	0	0	0	0	0	0	0	0	0	0	0	0	0	0	0	0	0	0	0	0	0	0	0	0	0	0	0	0	0	0	0	0
Bacteria/Firmicutes/Clostridia/Clostridiales/Family XI/Murdochiella	0	0	0	0	0	0	0	0	0	0	0	0	0	0	0	0	0	0	0	0	0	0	0	0	0	0	0	0	0	0	0	0	0	0	0	0	0	0	0	0	0	0	0	0	0
Bacteria/Firmicutes/Clostridia/Clostridiales/Family XI/Parvimonas	0	0	0	0	0	0	0	0	0	0	0	0	0	0	0	0	0	0	0	0	0	0	0	0	0	0	0	0	0	0	0	0	0	0	0	0	0	0	0	0	0	0	0	0	0
Bacteria/Firmicutes/Clostridia/Clostridiales/Family XI/Peptoniphilus	0	0	0	0	0	0	0	0	0	0	0	0	0	0	0	0	0	0	0	0	0	0	0	0	0	0	0	0	0	0	0	0	0	0	0	0	0	0	0	0	0	0	0	0	0
Bacteria/Firmicutes/Clostridia/Clostridiales/Family XI/Sedimentibacter	0	0	0	0	0	0	0	0	0	0	0	0	0	0	0	0	0	0	0	0	0	0	0	0	0	0	0	0	0	0	0	0	0	0	0	0	0	0	0	0	0	0	0	0	0
Bacteria/Firmicutes/Clostridia/Clostridiales/Family XI/Soehngenia	0	0	0	0	0	0	0	0	0	0	0	0	0	0	0	0	0	0	0	0	0	0	0	0	0	0	0	0	0	0	0	0	0	0	0	0	0	0	0	0	0	0	0	0	0
Bacteria/Firmicutes/Clostridia/Clostridiales/Family XI/Sporanaerobacter	0	0	0	0	0	0	0	0	0	0	0	0	0	0	0	0	0	0	0	0	0	0	0	0	0	0	0	0	0	0	0	0	0	0	0	0	0	0	0	0	0	0	0	0	0
Bacteria/Firmicutes/Clostridia/Clostridiales/Family XI/Tepidimicrobium	0	0	0	0	0	0	0	0	0	0	0	0	0	0	0	0	0	0	0	0	0	0	0	0	0	0	0	0	0	0	0	0	0	0	0	0	0	0	0	0	0	0	0	0	0
Bacteria/Firmicutes/Clostridia/Clostridiales/Family XI/Tissierella	0	0	0	0	0	0	0	0	0	0	0	0	0	0	0	0	0	0	0	0	0	0	0	0	0	0	0	0	0	0	0	0	0	0	0	0	0	0	0	0	0	0	0	0	0
Bacteria/Firmicutes/Clostridia/Clostridiales/Family XI/uncultured	0	0	0	0	0	0	0	0	0	0	0	0	0	0	0	0	0	0	0	0	0	0	0	0	0	0	0	0	0	0	0	0	0	0	0	0	0	0	0	0	0	0	0	0	0
Bacteria/Firmicutes/Clostridia/Clostridiales/Family XI/W5053	0	0	0	0	0	0	0	0	0	0	0	0	0	0	0	0	0	0	0	0	0	0	0	0	0	0	0	0	0	0	0	0	0	0	0	0	0	0	0	0	0	0	0	0	0
Bacteria/Firmicutes/Clostridia/Clostridiales/Family XII/Acidaminobacter	0	0	0	0	0	0	0	0	0	0	0	0	0	0	0	0	0	0	0	0	0	0	0	0	0	0	0	0	0	0	0	0	0	0	0	0	0	0	0	0	0	0	0	0	0
Bacteria/Firmicutes/Clostridia/Clostridiales/Family XII/Fusibacter	32	0	0	0	0	0	0	0	0	44	41	0	77	42	76	0	0	0	55	68	43	0	0	0	0	0	0	0	0	0	0	0	0	0	0	0	0	0	0	0	0	0	0	0	0
Bacteria/Firmicutes/Clostridia/Clostridiales/Family XII/Guggenheimella	0	0	0	0	0	0	0	0	0	0	0	0	0	0	0	0	0	0	0	0	0	0	0	0	0	0	0	0	0	0	0	0	0	0	0	0	0	0	0	0	0	0	0	0	0
Bacteria/Firmicutes/Clostridia/Clostridiales/Family XII/uncultured	0	0	0	0	0	0	0	0	0	0	0	0	0	0	0	0	0	0	0	0	0	0	0	0	0	0	0	0	0	0	0	0	0	0	0	0	0	0	0	0	0	0	0	0	0
Bacteria/Firmicutes/Clostridia/Clostridiales/Family XIII/[Eubacterium] brachy group	0	0	0	0	0	0	0	0	0	0	0	0	0	0	0	0	0	0	0	0	0	0	0	0	0	0	0	0	0	0	0	0	0	0	0	0	0	0	0	0	0	0	0	0	0
Bacteria/Firmicutes/Clostridia/Clostridiales/Family XIII/[Eubacterium] nodatum group	0	0	0	0	0	0	0	0	0	0	0	0	0	0	0	0	0	0	0	0	0	0	0	0	0	0	0	0	0	0	0	0	0	0	0	0	0	0	0	0	0	0	0	0	0
Bacteria/Firmicutes/Clostridia/Clostridiales/Family XIII/Anaerovorax	0	0	0	0	0	0	0	0	0	0	0	0	0	0	0	0	0	0	0	0	0	0	0	0	0	0	0	0	0	0	0	0	0	0	0	0	0	0	0	0	0	0	0	0	0
Bacteria/Firmicutes/Clostridia/Clostridiales/Family XIII/Family XIII AD3011 group	0	0	0	0	0	0	0	0	0	0	0	0	0	0	0	0	0	0	0	0	0	0	0	0	0	0	0	0	0	0	0	0	0	0	0	0	0	0	0	0	0	0	0	0	0
Bacteria/Firmicutes/Clostridia/Clostridiales/Family XIII/Family XIII UCG-001	0	0	0	0	0	0	0	0	0	0	0	0	0	0	0	0	0	0	0	0	0	0	0	0	0	0	0	0	0	0	0	0	0	0	0	0	0	0	0	0	0	0	0	0	0
Bacteria/Firmicutes/Clostridia/Clostridiales/Family XIII/Mogibacterium	0	0	0	0	0	0	0	0	0	0	0	0	0	0	0	0	0	0	0	0	0	0	0	0	0	0	0	0	0	0	0	0	0	0	0	0	0	0	0	0	0	0	0	0	0
Bacteria/Firmicutes/Clostridia/Clostridiales/Family XIII/S5-A14a	0	0	0	0	0	0	0	0	0	0	0	0	0	0	0	0	0	0	0	0	0	0	0	0	0	0	0	0	0	0	0	0	0	0	0	0	0	0	0	0	0	0	0	0	0
Bacteria/Firmicutes/Clostridia/Clostridiales/Family XIII/uncultured	0	0	0	0	0	0	0	0	0	0	0	0	0	0	0	0	0	0	0	0	0	0	0	0	0	0	0	0	0	0	0	0	0	0	0	0	0	0	0	0	0	0	0	0	0
Bacteria/Firmicutes/Clostridia/Clostridiales/Family XIV/Anaerobranca	0	0	0	0	0	0	0	0	0	0	0	0	0	0	0	0	0	0	0	0	0	0	0	0	0	0	0	0	0	0	0	0	0	0	0	0	0	0	0	0	0	0	0	0	0
Bacteria/Firmicutes/Clostridia/Clostridiales/Family XIV/Proteinivorax	0	0	0	0	0	0	0	0	0	0	0	0	0	0	0	0	0	0	0	0	0	0	0	0	0	0	0	0	0	0	0	0	0	0	0	0	0	0	0	0	0	0	0	0	0
Bacteria/Firmicutes/Clostridia/Clostridiales/Family XIV/uncultured	0	0	0	0	0	0	0	0	0	0	0	0	0	0	0	0	0	0	0	0	0	0	0	0	0	0	0	0	0	0	0	0	0	0	0	0	0	0	0	0	0	0	0	0	0
Bacteria/Firmicutes/Clostridia/Clostridiales/Family XVI/Carboxydocella	0	0	0	0	0	0	0	0	0	0	0	0	0	0	0	0	0	0	0	0	0	0	0	0	0	0	0	0	0	0	0	0	0	0	0	0	0	0	0	0	0	0	0	0	0
Bacteria/Firmicutes/Clostridia/Clostridiales/Family XVII/Sulfobacillus	0	0	0	0	0	0	0	0	0	0	0	0	0	0	0	0	0	0	0	0	0	0	0	0	0	0	0	0	0	0	0	0	0	0	0	0	0	0	0	0	0	0	0	0	0
Bacteria/Firmicutes/Clostridia/Clostridiales/Family XVII/uncultured	0	0	0	0	0	0	0	0	0	0	0	0	0	0	0	0	0	0	0	0	0	0	0	0	0	0	0	0	0	0	0	0	0	0	0	0	0	0	0	0	0	0	0	0	0
Bacteria/Firmicutes/Clostridia/Clostridiales/Family XVIII/Caldinitratiruptor	0	0	0	0	0	0	0	0	0	0	0	0	0	0	0	0	0	0	0	0	0	0	0	0	0	0	0	0	0	0	0	0	0	0	0	0	0	0	0	0	0	0	0	0	0
Bacteria/Firmicutes/Clostridia/Clostridiales/Family XVIII/uncultured	0	0	0	0	0	0	0	0	0	0	0	0	0	0	0	0	0	0	0	0	0	0	0	0	0	0	0	0	0	0	0	0	0	0	0	0	0	0	0	0	0	0	0	0	0
Bacteria/Firmicutes/Clostridia/Clostridiales/Gracilibacteraceae/Gracilibacter	0	0	0	0	0	0	0	0	0	0	0	0	0	0	0	0	0	0	0	0	0	0	0	0	0	0	0	0	0	0	0	0	0	0	0	0	0	0	0	0	0	0	0	0	0
Bacteria/Firmicutes/Clostridia/Clostridiales/Gracilibacteraceae/Lutispora	0	0	0	0	0	0	0	0	0	0	0	0	0	0	0	0	0	0	0	0	0	0	0	0	0	0	0	0	0	0	0	0	0	0	0	0	0	0	0	0	0	0	0	0	0
Bacteria/Firmicutes/Clostridia/Clostridiales/Gracilibacteraceae/uncultured	0	0	0	0	0	0	0	0	0	0	0	0	0	0	0	0	0	0	0	0	0	0	0	0	0	0	0	0	0	0	0	0	0	0	0	0	0	0	0	0	0	0	0	0	0
Bacteria/Firmicutes/Clostridia/Clostridiales/Heliobacteriaceae/Heliobacterium	0	0	0	0	0	0	0	0	0	0	0	0	0	0	0	0	0	0	0	0	0	0	0	0	0	0	0	0	0	0	0	0	0	0	0	0	0	0	0	0	0	0	0	0	0
Bacteria/Firmicutes/Clostridia/Clostridiales/Heliobacteriaceae/Hydrogenispora	0	0	0	0	0	0	0	0	0	0	0	0	0	0	0	0	0	0	0	0	0	0	0	0	0	0	0	0	0	0	0	0	0	0	0	0	0	0	0	0	0	0	0	0	0
Bacteria/Firmicutes/Clostridia/Clostridiales/Heliobacteriaceae/uncultured	0	0	0	0	0	0	0	0	0	0	0	0	0	0	0	0	0	0	0	0	0	0	0	0	0	0	0	0	0	0	0	0	0	0	0	0	0	0	0	0	0	0	0	0	0
Bacteria/Firmicutes/Clostridia/Clostridiales/Lachnospiraceae/[Eubacterium] eligens group	0	0	0	0	0	0	0	0	0	0	0	0	0	0	0	0	0	0	0	0	0	0	0	0	0	0	0	0	0	0	0	0	0	0	0	0	0	0	0	0	0	0	0	0	0
Bacteria/Firmicutes/Clostridia/Clostridiales/Lachnospiraceae/[Eubacterium] fissicatena group	0	0	0	0	0	0	0	0	0	0	0	0	0	0	0	0	0	0	0	0	0	0	0	0	0	0	0	0	0	0	0	0	0	0	0	0	0	0	0	0	0	0	0	0	0
Bacteria/Firmicutes/Clostridia/Clostridiales/Lachnospiraceae/[Eubacterium] hallii group	0	0	0	0	0	0	0	0	0	0	0	0	0	0	0	0	0	0	0	0	0	0	0	0	0	0	0	0	0	0	0	0	0	0	0	0	0	0	0	0	0	0	0	0	0
Bacteria/Firmicutes/Clostridia/Clostridiales/Lachnospiraceae/[Eubacterium] oxidoreducens group	0	0	0	0	0	0	0	0	0	0	0	0	0	0	0	0	0	0	0	0	0	0	0	0	0	0	0	0	0	0	0	0	0	0	0	0	0	0	0	0	0	0	0	0	0
Bacteria/Firmicutes/Clostridia/Clostridiales/Lachnospiraceae/[Eubacterium] ruminantium group	0	0	0	0	0	0	0	0	0	0	0	0	0	0	0	0	0	0	0	0	0	0	0	0	0	0	0	0	0	0	0	0	0	0	0	0	0	0	0	0	0	0	0	0	0
Bacteria/Firmicutes/Clostridia/Clostridiales/Lachnospiraceae/[Eubacterium] ventriosum group	0	0	0	0	0	0	0	0	0	0	0	0	0	0	0	0	0	0	0	0	0	0	0	0	0	0	0	0	0	0	0	0	0	0	0	0	0	0	0	0	0	0	0	0	0
Bacteria/Firmicutes/Clostridia/Clostridiales/Lachnospiraceae/[Eubacterium] xylanophilum group	0	0	0	0	0	0	0	0	0	0	0	0	0	0	0	0	0	0	0	0	0	0	0	0	0	0	0	0	0	0	0	0	0	0	0	0	0	0	0	0	0	0	0	0	0
Bacteria/Firmicutes/Clostridia/Clostridiales/Lachnospiraceae/[Ruminococcus] gauvreauii group	0	0	0	0	0	0	0	0	0	0	0	0	0	0	0	0	0	0	0	0	0	0	0	0	0	0	0	0	0	0	0	0	0	0	0	0	0	0	0	0	0	0	0	0	0
Bacteria/Firmicutes/Clostridia/Clostridiales/Lachnospiraceae/[Ruminococcus] gnavus group	0	0	0	0	0	0	0	0	0	0	0	0	0	0	0	0	0	0	0	0	0	0	0	0	0	0	0	0	0	0	0	0	0	0	0	0	0	0	0	0	0	0	0	0	0
Bacteria/Firmicutes/Clostridia/Clostridiales/Lachnospiraceae/[Ruminococcus] torques group	0	0	0	0	0	0	0	0	0	0	0	0	0	0	0	0	0	0	0	0	0	0	0	0	0	0	0	0	0	0	0	0	0	0	0	0	0	0	0	0	0	0	0	0	0
Bacteria/Firmicutes/Clostridia/Clostridiales/Lachnospiraceae/A2	0	0	0	0	0	0	0	0	0	0	0	0	0	0	0	0	0	0	0	0	0	0	0	0	0	0	0	0	0	0	0	0	0	0	0	0	0	0	0	0	0	0	0	0	0
Bacteria/Firmicutes/Clostridia/Clostridiales/Lachnospiraceae/Abyssivirga	0	0	0	0	0	0	0	0	0	0	0	0	0	0	0	0	0	0	0	0	0	0	0	0	0	0	0	0	0	0	0	0	0	0	0	0	0	0	0	0	0	0	0	0	0
Bacteria/Firmicutes/Clostridia/Clostridiales/Lachnospiraceae/Acetitomaculum	0	0	0	0	0	0	0	0	0	0	0	0	0	0	0	0	0	0	0	0	0	0	0	0	0	0	0	0	0	0	0	0	0	0	0	0	0	0	0	0	0	0	0	0	0
Bacteria/Firmicutes/Clostridia/Clostridiales/Lachnospiraceae/Agathobacter	0	0	0	0	0	0	0	0	0	0	0	0	0	0	0	0	0	0	0	0	0	0	0	0	0	0	0	0	0	0	0	0	0	0	0	0	0	0	0	0	0	0	0	0	0
Bacteria/Firmicutes/Clostridia/Clostridiales/Lachnospiraceae/Anaerocolumna	0	0	0	0	0	0	0	0	0	0	0	0	0	0	0	0	0	0	0	0	0	0	0	0	0	0	0	0	0	0	0	0	0	0	0	0	0	0	0	0	0	0	0	0	0
Bacteria/Firmicutes/Clostridia/Clostridiales/Lachnospiraceae/Anaerosporobacter	0	0	0	0	0	0	0	0	0	0	0	0	0	0	0	0	0	0	0	0	0	0	0	0	0	0	0	0	0	0	0	0	0	0	0	0	0	0	0	0	0	0	0	0	0
Bacteria/Firmicutes/Clostridia/Clostridiales/Lachnospiraceae/Anaerostipes	0	0	0	0	0	0	0	0	0	0	0	0	0	0	0	0	0	0	0	0	0	0	0	0	0	0	0	0	0	0	0	0	0	0	0	0	0	0	0	0	0	0	0	0	0
Bacteria/Firmicutes/Clostridia/Clostridiales/Lachnospiraceae/Blautia	0	0	0	0	0	0	0	0	0	0	0	0	0	0	0	0	0	0	0	0	0	0	0	0	0	0	0	0	0	0	0	0	0	0	0	0	0	0	0	0	0	0	0	0	0
Bacteria/Firmicutes/Clostridia/Clostridiales/Lachnospiraceae/Butyrivibrio 2	0	0	0	0	0	0	0	0	0	0	0	0	0	0	0	0	0	0	0	0	0	0	0	0	0	0	0	0	0	0	0	0	0	0	0	0	0	0	0	0	0	0	0	0	0
Bacteria/Firmicutes/Clostridia/Clostridiales/Lachnospiraceae/Catonella	0	0	0	0	0	0	0	0	0	0	0	0	0	0	0	0	0	0	0	0	0	0	0	0	0	0	0	0	0	0	0	0	0	0	0	0	0	0	0	0	0	0	0	0	0
Bacteria/Firmicutes/Clostridia/Clostridiales/Lachnospiraceae/Cellulosilyticum	0	0	0	0	0	0	0	0	0	0	0	0	0	0	0	0	0	0	0	0	0	0	0	0	0	0	0	0	0	0	0	0	0	0	0	0	0	0	0	0	0	0	0	0	0
Bacteria/Firmicutes/Clostridia/Clostridiales/Lachnospiraceae/CHKCI001	0	0	0	0	0	0	0	0	0	0	0	0	0	0	0	0	0	0	0	0	0	0	0	0	0	0	0	0	0	0	0	0	0	0	0	0	0	0	0	0	0	0	0	0	0
Bacteria/Firmicutes/Clostridia/Clostridiales/Lachnospiraceae/Coprococcus 1	0	0	0	0	0	0	0	0	0	0	0	0	0	0	0	0	0	0	0	0	0	0	0	0	0	0	0	0	0	0	0	0	0	0	0	0	0	0	0	0	0	0	0	0	0
Bacteria/Firmicutes/Clostridia/Clostridiales/Lachnospiraceae/Coprococcus 2	0	0	0	0	0	0	0	0	0	0	0	0	0	0	0	0	0	0	0	0	0	0	0	0	0	0	0	0	0	0	0	0	0	0	0	0	0	0	0	0	0	0	0	0	0
Bacteria/Firmicutes/Clostridia/Clostridiales/Lachnospiraceae/Coprococcus 3	0	0	0	0	0	0	0	0	0	0	0	0	0	0	0	0	0	0	0	0	0	0	0	0	0	0	0	0	0	0	0	0	0	0	0	0	0	0	0	0	0	0	0	0	0
Bacteria/Firmicutes/Clostridia/Clostridiales/Lachnospiraceae/Dorea	0	0	0	0	0	0	0	0	0	0	0	0	0	0	0	0	0	0	0	0	0	0	0	0	0	0	0	0	0	0	0	0	0	0	0	0	0	0	0	0	0	0	0	0	0
Bacteria/Firmicutes/Clostridia/Clostridiales/Lachnospiraceae/Eisenbergiella	0	0	0	0	0	0	0	0	0	0	0	0	0	0	0	0	0	0	0	0	0	0	0	0	0	0	0	0	0	0	0	0	0	0	0	0	0	0	0	0	0	0	0	0	0
Bacteria/Firmicutes/Clostridia/Clostridiales/Lachnospiraceae/Epulopiscium	0	0	0	0	0	0	0	0	0	0	0	0	0	0	0	0	0	0	0	0	0	0	0	0	0	0	0	0	0	0	0	0	0	0	0	0	0	0	0	0	0	0	0	0	0
Bacteria/Firmicutes/Clostridia/Clostridiales/Lachnospiraceae/Fusicatenibacter	0	0	0	0	0	0	0	0	0	0	0	0	0	0	0	0	0	0	0	0	0	0	0	0	0	0	0	0	0	0	0	0	0	0	0	0	0	0	0	0	0	0	0	0	0
Bacteria/Firmicutes/Clostridia/Clostridiales/Lachnospiraceae/GCA-900066575	0	0	0	0	0	0	0	0	0	0	0	0	0	0	0	0	0	0	0	0	0	0	0	0	0	0	0	0	0	0	0	0	0	0	0	0	0	0	0	0	0	0	0	0	0
Bacteria/Firmicutes/Clostridia/Clostridiales/Lachnospiraceae/Herbinix	0	0	0	0	0	0	0	0	0	0	0	0	0	0	0	0	0	0	0	0	0	0	0	0	0	0	0	0	0	0	0	0	0	0	0	0	0	0	0	0	0	0	0	0	0
Bacteria/Firmicutes/Clostridia/Clostridiales/Lachnospiraceae/Incertae Sedis	0	0	0	0	0	0	0	0	0	0	0	0	0	0	0	0	0	0	0	0	0	0	0	0	0	0	0	0	0	0	0	0	0	0	0	0	0	0	0	0	0	0	0	0	0
Bacteria/Firmicutes/Clostridia/Clostridiales/Lachnospiraceae/Johnsonella	0	0	0	0	0	0	0	0	0	0	0	0	0	0	0	0	0	0	0	0	0	0	0	0	0	0	0	0	0	0	0	0	0	0	0	0	0	0	0	0	0	0	0	0	0
Bacteria/Firmicutes/Clostridia/Clostridiales/Lachnospiraceae/Lachnoanaerobaculum	0	0	0	0	0	0	0	0	0	0	0	0	0	0	0	0	0	0	0	0	0	0	0	0	0	0	0	0	0	0	0	0	0	0	0	0	0	0	0	0	0	0	0	0	0
Bacteria/Firmicutes/Clostridia/Clostridiales/Lachnospiraceae/Lachnoclostridium 10	0	0	0	0	0	0	0	0	0	0	0	0	0	0	0	0	0	0	0	0	0	0	0	0	0	0	0	0	0	0	0	0	0	0	0	0	0	0	0	0	0	0	0	0	0
Bacteria/Firmicutes/Clostridia/Clostridiales/Lachnospiraceae/Lachnoclostridium 12	0	0	0	0	0	0	0	0	0	0	0	0	0	0	0	0	0	0	0	0	0	0	0	0	0	0	0	0	0	0	0	0	0	0	0	0	0	0	0	0	0	0	0	0	0
Bacteria/Firmicutes/Clostridia/Clostridiales/Lachnospiraceae/Lachnoclostridium 5	0	0	0	0	0	0	0	0	0	0	0	0	0	0	0	0	0	0	0	0	0	0	0	0	0	0	0	0	0	0	0	0	0	0	0	0	0	0	0	0	0	0	0	0	0
Bacteria/Firmicutes/Clostridia/Clostridiales/Lachnospiraceae/Lachnoclostridium	0	0	0	0	0	0	0	0	0	0	0	0	0	0	0	0	0	0	0	0	0	0	0	0	0	0	0	0	0	0	0	0	0	0	0	0	0	0	0	0	0	0	0	0	0
Bacteria/Firmicutes/Clostridia/Clostridiales/Lachnospiraceae/Lachnospiraceae AC2044 group	0	0	0	0	0	0	0	0	0	0	0	0	0	0	0	0	0	0	0	0	0	0	0	0	0	0	0	0	0	0	0	0	0	0	0	0	0	0	0	0	0	0	0	0	0
Bacteria/Firmicutes/Clostridia/Clostridiales/Lachnospiraceae/Lachnospiraceae FCS020 group	0	0	0	0	0	0	0	0	0	0	0	0	0	0	0	0	0	0	0	0	0	0	0	0	0	0	0	0	0	0	0	0	0	0	0	0	0	0	0	0	0	0	0	0	0
Bacteria/Firmicutes/Clostridia/Clostridiales/Lachnospiraceae/Lachnospiraceae NC2004 group	0	0	0	0	0	0	0	0	0	0	0	0	0	0	0	0	0	0	0	0	0	0	0	0	0	0	0	0	0	0	0	0	0	0	0	0	0	0	0	0	0	0	0	0	0
Bacteria/Firmicutes/Clostridia/Clostridiales/Lachnospiraceae/Lachnospiraceae ND3007 group	0	0	0	0	0	0	0	0	0	0	0	0	0	0	0	0	0	0	0	0	0	0	0	0	0	0	0	0	0	0	0	0	0	0	0	0	0	0	0	0	0	0	0	0	0
Bacteria/Firmicutes/Clostridia/Clostridiales/Lachnospiraceae/Lachnospiraceae NK3A20 group	0	0	0	0	0	0	0	0	0	0	0	0	0	0	0	0	0	0	0	0	0	0	0	0	0	0	0	0	0	0	0	0	0	0	0	0	0	0	0	0	0	0	0	0	0
Bacteria/Firmicutes/Clostridia/Clostridiales/Lachnospiraceae/Lachnospiraceae NK4A136 group	0	0	0	0	0	0	0	0	0	0	0	0	0	0	0	0	0	0	0	0	0	0	0	0	0	0	0	0	0	0	0	0	0	0	0	0	0	0	0	0	0	0	0	0	0
Bacteria/Firmicutes/Clostridia/Clostridiales/Lachnospiraceae/Lachnospiraceae NK4B4 group	0	0	0	0	0	0	0	0	0	0	0	0	0	0	0	0	0	0	0	0	0	0	0	0	0	0	0	0	0	0	0	0	0	0	0	0	0	0	0	0	0	0	0	0	0
Bacteria/Firmicutes/Clostridia/Clostridiales/Lachnospiraceae/Lachnospiraceae UCG-001	0	0	0	0	0	0	0	0	0	0	0	0	0	0	0	0	0	0	0	0	0	0	0	0	0	0	0	0	0	0	0	0	0	0	0	0	0	0	0	0	0	0	0	0	0
Bacteria/Firmicutes/Clostridia/Clostridiales/Lachnospiraceae/Lachnospiraceae UCG-002	0	0	0	0	0	0	0	0	0	0	0	0	0	0	0	0	0	0	0	0	0	0	0	0	0	0	0	0	0	0	0	0	0	0	0	0	0	0	0	0	0	0	0	0	0
Bacteria/Firmicutes/Clostridia/Clostridiales/Lachnospiraceae/Lachnospiraceae UCG-004	0	0	0	0	0	0	0	0	0	0	0	0	0	0	0	0	0	0	0	0	0	0	0	0	0	0	0	0	0	0	0	0	0	0	0	0	0	0	0	0	0	0	0	0	0
Bacteria/Firmicutes/Clostridia/Clostridiales/Lachnospiraceae/Lachnospiraceae UCG-006	0	0	0	0	0	0	0	0	0	0	0	0	0	0	0	0	0	0	0	0	0	0	0	0	0	0	0	0	0	0	0	0	0	0	0	0	0	0	0	0	0	0	0	0	0
Bacteria/Firmicutes/Clostridia/Clostridiales/Lachnospiraceae/Lachnospiraceae UCG-008	0	0	0	0	0	0	0	0	0	0	0	0	0	0	0	0	0	0	0	0	0	0	0	0	0	0	0	0	0	0	0	0	0	0	0	0	0	0	0	0	0	0	0	0	0
Bacteria/Firmicutes/Clostridia/Clostridiales/Lachnospiraceae/Lachnospiraceae UCG-010	0	0	0	0	0	0	0	0	0	0	0	0	0	0	0	0	0	0	0	0	0	0	0	0	0	0	0	0	0	0	0	0	0	0	0	0	0	0	0	0	0	0	0	0	0
Bacteria/Firmicutes/Clostridia/Clostridiales/Lachnospiraceae/Lachnospiraceae XPB1014 group	0	0	0	0	0	0	0	0	0	0	0	0	0	0	0	0	0	0	0	0	0	0	0	0	0	0	0	0	0	0	0	0	0	0	0	0	0	0	0	0	0	0	0	0	0
Bacteria/Firmicutes/Clostridia/Clostridiales/Lachnospiraceae/Lachnotalea	0	0	0	0	0	0	0	0	0	0	0	0	0	0	0	0	0	0	0	0	0	0	0	0	0	0	0	0	0	0	0	0	0	0	0	0	0	0	0	0	0	0	0	0	0
Bacteria/Firmicutes/Clostridia/Clostridiales/Lachnospiraceae/Marvinbryantia	0	0	0	0	0	0	0	0	0	0	0	0	0	0	0	0	0	0	0	0	0	0	0	0	0	0	0	0	0	0	0	0	0	0	0	0	0	0	0	0	0	0	0	0	0
Bacteria/Firmicutes/Clostridia/Clostridiales/Lachnospiraceae/Mobilitalea	0	0	0	0	0	0	0	0	0	0	0	0	0	0	0	0	0	0	0	0	0	0	0	0	0	0	0	0	0	0	0	0	0	0	0	0	0	0	0	0	0	0	0	0	0
Bacteria/Firmicutes/Clostridia/Clostridiales/Lachnospiraceae/Moryella	0	0	0	0	0	0	0	0	0	0	0	0	0	0	0	0	0	0	0	0	0	0	0	0	0	0	0	0	0	0	0	0	0	0	0	0	0	0	0	0	0	0	0	0	0
Bacteria/Firmicutes/Clostridia/Clostridiales/Lachnospiraceae/Natranaerovirga	0	0	0	0	0	0	0	0	0	0	0	0	0	0	0	0	0	0	0	0	0	0	0	0	0	0	0	0	0	0	0	0	0	0	0	0	0	0	0	0	0	0	0	0	0
Bacteria/Firmicutes/Clostridia/Clostridiales/Lachnospiraceae/Oribacterium	0	0	0	0	0	0	0	0	0	0	0	0	0	0	0	0	0	0	0	0	0	0	0	0	0	0	0	0	0	0	0	0	0	0	0	0	0	0	0	0	0	0	0	0	0
Bacteria/Firmicutes/Clostridia/Clostridiales/Lachnospiraceae/possible genus Sk003-Sk004	0	0	0	0	0	0	0	0	0	0	0	0	0	0	0	0	0	0	0	0	0	0	0	0	0	0	0	0	0	0	0	0	0	0	0	0	0	0	0	0	0	0	0	0	0
Bacteria/Firmicutes/Clostridia/Clostridiales/Lachnospiraceae/probable genus 10	0	0	0	0	0	0	0	0	0	0	0	0	0	0	0	0	0	0	0	0	0	0	0	0	0	0	0	0	0	0	0	0	0	0	0	0	0	0	0	0	0	0	0	0	0
Bacteria/Firmicutes/Clostridia/Clostridiales/Lachnospiraceae/Pseudobutyrivibrio	0	0	0	0	0	0	0	0	0	0	0	0	0	0	0	0	0	0	0	0	0	0	0	0	0	0	0	0	0	0	0	0	0	0	0	0	0	0	0	0	0	0	0	0	0
Bacteria/Firmicutes/Clostridia/Clostridiales/Lachnospiraceae/Roseburia	0	0	0	0	0	0	0	0	0	0	0	0	0	0	0	0	0	0	0	0	0	0	0	0	0	0	0	0	0	0	0	0	0	0	0	0	0	0	0	0	0	0	0	0	0
Bacteria/Firmicutes/Clostridia/Clostridiales/Lachnospiraceae/Shuttleworthia	0	0	0	0	0	0	0	0	0	0	0	0	0	0	0	0	0	0	0	0	0	0	0	0	0	0	0	0	0	0	0	0	0	0	0	0	0	0	0	0	0	0	0	0	0
Bacteria/Firmicutes/Clostridia/Clostridiales/Lachnospiraceae/Stomatobaculum	0	0	0	0	0	0	0	0	0	0	0	0	0	0	0	0	0	0	0	0	0	0	0	0	0	0	0	0	0	0	0	0	0	0	0	0	0	0	0	0	0	0	0	0	0
Bacteria/Firmicutes/Clostridia/Clostridiales/Lachnospiraceae/Tyzzerella 3	0	0	0	0	0	0	0	0	0	0	0	0	0	0	0	0	0	0	0	0	0	0	0	0	0	0	0	0	0	0	0	0	0	0	0	0	0	0	0	0	0	0	0	0	0
Bacteria/Firmicutes/Clostridia/Clostridiales/Lachnospiraceae/Tyzzerella 4	0	0	0	0	0	0	0	0	0	0	0	0	0	0	0	0	0	0	0	0	0	0	0	0	0	0	0	0	0	0	0	0	0	0	0	0	0	0	0	0	0	0	0	0	0
Bacteria/Firmicutes/Clostridia/Clostridiales/Lachnospiraceae/Tyzzerella	0	0	0	0	0	0	0	0	0	0	0	0	0	0	0	0	0	0	0	0	0	0	0	0	0	0	0	0	0	0	0	0	0	0	0	0	0	0	0	0	0	0	0	0	0
Bacteria/Firmicutes/Clostridia/Clostridiales/Lachnospiraceae/uncultured	0	0	0	0	0	0	0	0	0	0	0	0	145	0	0	0	0	0	0	0	0	0	0	0	0	0	0	0	0	0	0	0	0	0	0	0	0	0	0	0	0	0	0	0	0
Bacteria/Firmicutes/Clostridia/Clostridiales/Lachnospiraceae/Vallitalea	0	0	0	0	0	0	0	0	0	0	0	0	0	0	0	0	0	0	0	0	0	0	0	0	0	0	0	0	0	0	0	0	0	0	0	0	0	0	0	0	0	0	0	0	0
Bacteria/Firmicutes/Clostridia/Clostridiales/Peptococcaceae/BRH-c8a	0	0	0	0	0	0	0	0	0	0	0	0	0	0	0	0	0	0	0	0	0	0	0	0	0	0	0	0	0	0	0	0	0	0	0	0	0	0	0	0	0	0	0	0	0
Bacteria/Firmicutes/Clostridia/Clostridiales/Peptococcaceae/Candidatus Dichloromethanomonas	0	0	0	0	0	0	0	0	0	0	0	0	0	0	0	0	0	0	0	0	0	0	0	0	0	0	0	0	0	0	0	0	0	0	0	0	0	0	0	0	0	0	0	0	0
Bacteria/Firmicutes/Clostridia/Clostridiales/Peptococcaceae/Cryptanaerobacter	0	0	0	0	0	0	0	0	0	0	0	0	0	0	0	0	0	0	0	0	0	0	0	0	0	0	0	0	0	0	0	0	0	0	0	0	0	0	0	0	0	0	0	0	0
Bacteria/Firmicutes/Clostridia/Clostridiales/Peptococcaceae/Dehalobacter	0	0	0	0	0	0	0	0	0	0	0	0	0	0	0	0	0	0	0	0	0	0	0	0	0	0	0	0	0	0	0	0	0	0	0	0	0	0	0	0	0	0	0	0	0
Bacteria/Firmicutes/Clostridia/Clostridiales/Peptococcaceae/Dehalobacterium	0	0	0	0	0	0	0	0	0	0	0	0	0	0	0	0	0	0	0	0	0	0	0	0	0	0	0	0	0	0	0	0	0	0	0	0	0	0	0	0	0	0	0	0	0
Bacteria/Firmicutes/Clostridia/Clostridiales/Peptococcaceae/Desulfitibacter	0	0	0	0	0	0	0	0	0	0	0	0	0	0	0	0	0	0	0	0	0	0	0	0	0	0	0	0	0	0	0	0	0	0	0	0	0	0	0	0	0	0	0	0	0
Bacteria/Firmicutes/Clostridia/Clostridiales/Peptococcaceae/Desulfitispora	0	0	0	0	0	0	0	0	0	0	0	0	0	0	0	0	0	0	0	0	0	0	0	0	0	0	0	0	0	0	0	0	0	0	0	0	0	0	0	0	0	0	0	0	0
Bacteria/Firmicutes/Clostridia/Clostridiales/Peptococcaceae/Desulfitobacterium	0	0	0	0	0	0	0	0	0	0	0	0	0	0	0	0	0	0	0	0	0	0	0	0	0	0	0	0	0	0	0	0	0	0	0	0	0	0	0	0	0	0	0	0	0
Bacteria/Firmicutes/Clostridia/Clostridiales/Peptococcaceae/Desulfonispora	0	0	0	0	0	0	0	0	0	0	0	0	0	0	0	0	0	0	0	0	0	0	0	0	0	0	0	0	0	0	0	0	0	0	0	0	0	0	0	0	0	0	0	0	0
Bacteria/Firmicutes/Clostridia/Clostridiales/Peptococcaceae/Desulfosporosinus	262	133	150	115	112	86	82	81	78	0	0	59	107	84	104	174	110	80	57	61	49	62	0	70	0	60	94	59	39	47	0	0	0	71	44	58	68	47	0	79	0	84	0	0	84
Bacteria/Firmicutes/Clostridia/Clostridiales/Peptococcaceae/Desulfotomaculum	0	0	0	0	0	0	0	0	0	0	0	0	0	0	0	0	0	0	0	0	0	0	0	0	0	0	0	0	0	0	0	0	0	0	0	0	0	0	0	0	0	0	0	0	0
Bacteria/Firmicutes/Clostridia/Clostridiales/Peptococcaceae/Desulfurispora	0	0	0	0	0	0	0	0	0	0	0	0	0	0	0	0	0	0	0	0	0	0	0	0	0	0	0	0	0	0	0	0	0	0	0	0	0	0	0	0	0	0	0	0	0
Bacteria/Firmicutes/Clostridia/Clostridiales/Peptococcaceae/Pelotomaculum	0	0	0	0	0	0	0	0	0	0	0	0	0	0	0	0	0	0	0	0	0	0	0	0	0	0	0	0	0	0	0	0	0	0	0	0	0	0	0	0	0	0	0	0	0
Bacteria/Firmicutes/Clostridia/Clostridiales/Peptococcaceae/Peptococcus	0	0	0	0	0	0	0	0	0	0	0	0	0	0	0	0	0	0	0	0	0	0	0	0	0	0	0	0	0	0	0	0	0	0	0	0	0	0	0	0	0	0	0	0	0
Bacteria/Firmicutes/Clostridia/Clostridiales/Peptococcaceae/SCADC1-2-3	0	0	0	0	0	0	0	0	0	0	0	0	0	0	0	0	0	0	0	0	0	0	0	0	0	0	0	0	0	0	0	0	0	0	0	0	0	0	0	0	0	0	0	0	0
Bacteria/Firmicutes/Clostridia/Clostridiales/Peptococcaceae/Thermincola	0	0	0	0	0	0	0	0	0	0	0	0	0	0	0	0	0	0	0	0	0	0	0	0	0	0	0	0	0	0	0	0	0	0	0	0	0	0	0	0	0	0	0	0	0
Bacteria/Firmicutes/Clostridia/Clostridiales/Peptococcaceae/uncultured	0	0	0	0	0	0	0	0	0	0	0	0	0	0	0	0	0	0	0	0	0	0	0	0	0	0	0	0	0	0	0	0	0	0	0	0	0	0	0	0	0	0	0	0	0
Bacteria/Firmicutes/Clostridia/Clostridiales/Peptostreptococcaceae/[Eubacterium] yurii group	0	0	0	0	0	0	0	0	0	0	0	0	0	0	0	0	0	0	0	0	0	0	0	0	0	0	0	0	0	0	0	0	0	0	0	0	0	0	0	0	0	0	0	0	0
Bacteria/Firmicutes/Clostridia/Clostridiales/Peptostreptococcaceae/Acetoanaerobium	0	0	0	0	0	0	0	0	0	0	0	0	0	0	0	0	0	0	0	0	0	0	0	0	0	0	0	0	0	0	0	0	0	0	0	0	0	0	0	0	0	0	0	0	0
Bacteria/Firmicutes/Clostridia/Clostridiales/Peptostreptococcaceae/Clostridioides	0	0	0	0	0	0	0	0	0	0	0	0	0	0	0	0	0	0	0	0	0	0	0	0	0	0	0	0	0	0	0	0	0	0	0	0	0	0	0	0	0	0	0	0	0
Bacteria/Firmicutes/Clostridia/Clostridiales/Peptostreptococcaceae/Filifactor	0	0	0	0	0	0	0	0	0	0	0	0	0	0	0	0	0	0	0	0	0	0	0	0	0	0	0	0	0	0	0	0	0	0	0	0	0	0	0	0	0	0	0	0	0
Bacteria/Firmicutes/Clostridia/Clostridiales/Peptostreptococcaceae/Intestinibacter	0	0	0	0	0	0	0	0	0	0	0	0	0	0	0	0	0	0	0	0	0	0	0	0	0	0	0	0	0	0	0	0	0	0	0	0	0	0	0	0	0	0	0	0	0
Bacteria/Firmicutes/Clostridia/Clostridiales/Peptostreptococcaceae/Paeniclostridium	0	0	0	0	0	0	0	0	0	0	0	0	0	0	0	0	0	0	0	0	0	0	0	0	0	0	0	0	0	0	0	0	0	0	0	0	0	0	0	0	0	0	0	0	0
Bacteria/Firmicutes/Clostridia/Clostridiales/Peptostreptococcaceae/Paraclostridium	0	0	0	0	0	0	0	0	0	0	0	0	0	0	0	0	0	0	0	0	0	0	0	0	0	0	0	0	0	0	0	0	0	0	0	0	0	0	0	0	0	0	0	0	0
Bacteria/Firmicutes/Clostridia/Clostridiales/Peptostreptococcaceae/Peptoclostridium	0	0	0	0	0	0	0	0	0	0	0	0	0	0	0	0	0	0	0	0	0	0	0	0	0	0	0	0	0	0	0	0	0	0	0	0	0	0	0	0	0	0	0	0	0
Bacteria/Firmicutes/Clostridia/Clostridiales/Peptostreptococcaceae/Peptostreptococcus	0	0	0	0	0	0	0	0	0	0	0	0	0	0	0	0	0	0	0	0	0	0	0	0	0	0	0	0	0	0	0	0	0	0	0	0	0	0	0	0	0	0	0	0	0
Bacteria/Firmicutes/Clostridia/Clostridiales/Peptostreptococcaceae/Proteocatella	0	0	0	0	0	0	0	0	0	0	0	0	0	0	0	0	0	0	0	0	0	0	0	0	0	0	0	0	0	0	0	0	0	0	0	0	0	0	0	0	0	0	0	0	0
Bacteria/Firmicutes/Clostridia/Clostridiales/Peptostreptococcaceae/Romboutsia	0	0	0	0	0	0	0	0	0	0	0	0	0	0	0	0	0	0	0	0	0	0	0	0	0	0	0	0	0	0	0	0	0	0	0	0	0	0	0	0	0	0	0	0	0
Bacteria/Firmicutes/Clostridia/Clostridiales/Peptostreptococcaceae/Sporacetigenium	0	0	0	0	0	0	0	0	0	0	0	0	0	0	0	0	0	0	0	0	0	0	0	0	0	0	0	0	0	0	0	0	0	0	0	0	0	0	0	0	0	0	0	0	0
Bacteria/Firmicutes/Clostridia/Clostridiales/Peptostreptococcaceae/Tepidibacter	0	0	0	0	0	0	0	0	0	0	0	0	0	0	0	0	0	0	0	0	0	0	0	0	0	0	0	0	0	0	0	0	0	0	0	0	0	0	0	0	0	0	0	0	0
Bacteria/Firmicutes/Clostridia/Clostridiales/Peptostreptococcaceae/Terrisporobacter	0	0	0	0	0	0	0	0	0	0	0	0	0	0	0	0	0	0	0	0	0	0	0	0	0	0	0	0	0	0	0	0	0	0	0	0	0	0	0	0	0	0	0	0	0
Bacteria/Firmicutes/Clostridia/Clostridiales/Peptostreptococcaceae/uncultured	0	0	0	0	0	0	0	0	0	0	0	0	0	0	0	0	0	0	0	0	0	0	0	0	0	0	0	0	0	0	0	0	0	0	0	0	0	0	0	0	0	0	0	0	0
Bacteria/Firmicutes/Clostridia/Clostridiales/Ruminococcaceae/[Eubacterium] coprostanoligenes group	0	0	0	0	0	0	0	0	0	0	0	0	0	0	0	0	0	0	0	0	0	0	0	0	0	0	0	0	0	0	0	0	0	0	0	0	0	0	0	0	0	0	0	0	0
Bacteria/Firmicutes/Clostridia/Clostridiales/Ruminococcaceae/Acetivibrio	0	0	0	0	0	0	0	0	0	0	0	0	0	0	0	0	0	0	0	0	0	0	0	0	0	0	0	0	0	0	0	0	0	0	0	0	0	0	0	0	0	0	0	0	0
Bacteria/Firmicutes/Clostridia/Clostridiales/Ruminococcaceae/Anaerobacterium	0	0	0	0	0	0	0	0	0	0	0	0	0	0	0	0	0	0	0	0	0	0	0	0	0	0	0	0	0	0	0	0	0	0	0	0	0	0	0	0	0	0	0	0	0
Bacteria/Firmicutes/Clostridia/Clostridiales/Ruminococcaceae/Anaerotruncus	0	0	0	0	0	0	0	0	0	0	0	0	0	0	0	0	0	0	0	0	0	0	0	0	0	0	0	0	0	0	0	0	0	0	0	0	0	0	0	0	0	0	0	0	0
Bacteria/Firmicutes/Clostridia/Clostridiales/Ruminococcaceae/Butyricicoccus	0	0	0	0	0	0	0	0	0	0	0	0	0	0	0	0	0	0	0	0	0	0	0	0	0	0	0	0	0	0	0	0	0	0	0	0	0	0	0	0	0	0	0	0	0
Bacteria/Firmicutes/Clostridia/Clostridiales/Ruminococcaceae/CAG-352	0	0	0	0	0	0	0	0	0	0	0	0	0	0	0	0	0	0	0	0	0	0	0	0	0	0	0	0	0	0	0	0	0	0	0	0	0	0	0	0	0	0	0	0	0
Bacteria/Firmicutes/Clostridia/Clostridiales/Ruminococcaceae/Candidatus Soleaferrea	0	0	0	0	0	0	0	0	0	0	0	0	0	0	0	0	0	0	0	0	0	0	0	0	0	0	0	0	0	0	0	0	0	0	0	0	0	0	0	0	0	0	0	0	0
Bacteria/Firmicutes/Clostridia/Clostridiales/Ruminococcaceae/Caproiciproducens	0	0	0	0	0	0	0	0	0	0	0	0	0	0	0	0	0	0	0	0	0	0	0	0	0	0	0	0	0	0	0	0	0	0	0	0	0	0	0	0	0	0	0	0	0
Bacteria/Firmicutes/Clostridia/Clostridiales/Ruminococcaceae/Ercella	0	0	0	0	0	0	0	0	0	0	0	0	0	0	0	0	0	0	0	0	0	0	0	0	0	0	0	0	0	0	0	0	0	0	0	0	0	0	0	0	0	0	0	0	0
Bacteria/Firmicutes/Clostridia/Clostridiales/Ruminococcaceae/Faecalibacterium	0	0	0	0	0	0	0	0	0	0	0	0	0	0	0	0	0	0	0	0	0	0	0	0	0	0	0	0	0	0	0	0	0	0	0	0	0	0	0	0	0	0	0	0	0
Bacteria/Firmicutes/Clostridia/Clostridiales/Ruminococcaceae/Fastidiosipila	0	0	0	0	0	0	0	0	0	0	0	0	0	0	0	0	0	0	0	0	0	0	0	0	0	0	0	0	0	0	0	0	0	0	0	0	0	0	0	0	0	0	0	0	0
Bacteria/Firmicutes/Clostridia/Clostridiales/Ruminococcaceae/Flavonifractor	0	0	0	0	0	0	0	0	0	0	0	0	0	0	0	0	0	0	0	0	0	0	0	0	0	0	0	0	0	0	0	0	0	0	0	0	0	0	0	0	0	0	0	0	0
Bacteria/Firmicutes/Clostridia/Clostridiales/Ruminococcaceae/GCA-900066225	0	0	0	0	0	0	0	0	0	0	0	0	0	0	0	0	0	0	0	0	0	0	0	0	0	0	0	0	0	0	0	0	0	0	0	0	0	0	0	0	0	0	0	0	0
Bacteria/Firmicutes/Clostridia/Clostridiales/Ruminococcaceae/Hydrogenoanaerobacterium	0	0	0	0	0	0	0	0	0	0	0	0	0	0	0	0	0	0	0	0	0	0	0	0	0	0	0	0	0	0	0	0	0	0	0	0	0	0	0	0	0	0	0	0	0
Bacteria/Firmicutes/Clostridia/Clostridiales/Ruminococcaceae/Intestinimonas	0	0	0	0	0	0	0	0	0	0	0	0	0	0	0	0	0	0	0	0	0	0	0	0	0	0	0	0	0	0	0	0	0	0	0	0	0	0	0	0	0	0	0	0	0
Bacteria/Firmicutes/Clostridia/Clostridiales/Ruminococcaceae/Negativibacillus	0	0	0	0	0	0	0	0	0	0	0	0	0	0	0	0	0	0	0	0	0	0	0	0	0	0	0	0	0	0	0	0	0	0	0	0	0	0	0	0	0	0	0	0	0
Bacteria/Firmicutes/Clostridia/Clostridiales/Ruminococcaceae/Oscillibacter	0	0	0	0	0	0	0	0	0	0	0	0	0	0	0	0	0	0	0	0	0	0	0	0	0	0	0	0	0	0	0	0	0	0	0	0	0	0	0	0	0	0	0	0	0
Bacteria/Firmicutes/Clostridia/Clostridiales/Ruminococcaceae/Papillibacter	0	0	0	0	0	0	0	0	0	0	0	0	0	0	0	0	0	0	0	0	0	0	0	0	0	0	0	0	0	0	0	0	0	0	0	0	0	0	0	0	0	0	0	0	0
Bacteria/Firmicutes/Clostridia/Clostridiales/Ruminococcaceae/Pseudobacteroides	0	0	0	0	0	0	0	0	0	0	0	0	0	0	0	0	0	0	0	0	0	0	0	0	0	0	0	0	0	0	0	0	0	0	0	0	0	0	0	0	0	0	0	0	0
Bacteria/Firmicutes/Clostridia/Clostridiales/Ruminococcaceae/Pygmaiobacter	0	0	0	0	0	0	0	0	0	0	0	0	0	0	0	0	0	0	0	0	0	0	0	0	0	0	0	0	0	0	0	0	0	0	0	0	0	0	0	0	0	0	0	0	0
Bacteria/Firmicutes/Clostridia/Clostridiales/Ruminococcaceae/Ruminiclostridium 1	0	0	0	0	0	0	0	0	0	0	0	0	0	0	0	0	0	0	0	0	0	0	0	0	0	0	0	0	0	0	0	0	0	0	0	0	0	0	0	0	0	0	0	0	0
Bacteria/Firmicutes/Clostridia/Clostridiales/Ruminococcaceae/Ruminiclostridium 5	0	0	0	0	0	0	0	0	0	0	0	0	0	0	0	0	0	0	0	0	0	0	0	0	0	0	0	0	0	0	0	0	0	0	0	0	0	0	0	0	0	0	0	0	0
Bacteria/Firmicutes/Clostridia/Clostridiales/Ruminococcaceae/Ruminiclostridium 6	0	0	0	0	0	0	0	0	0	0	0	0	0	0	0	0	0	0	0	0	0	0	0	0	0	0	0	0	0	0	0	0	0	0	0	0	0	0	0	0	0	0	0	0	0
Bacteria/Firmicutes/Clostridia/Clostridiales/Ruminococcaceae/Ruminiclostridium 9	0	0	0	0	0	0	0	0	0	0	0	0	0	0	0	0	0	0	0	0	0	0	0	0	0	0	0	0	0	0	0	0	0	0	0	0	0	0	0	0	0	0	0	0	0
Bacteria/Firmicutes/Clostridia/Clostridiales/Ruminococcaceae/Ruminiclostridium	0	0	0	0	0	0	0	0	0	0	0	0	0	0	0	0	0	0	0	0	0	0	0	0	0	0	0	0	0	0	0	0	0	0	0	0	0	0	0	0	0	0	0	0	0
Bacteria/Firmicutes/Clostridia/Clostridiales/Ruminococcaceae/Ruminococcaceae NK4A214 group	0	0	0	0	0	0	0	0	0	0	0	0	0	0	0	0	0	0	0	0	0	0	0	0	0	0	0	0	0	0	0	0	0	0	0	0	0	0	0	0	0	0	0	0	0
Bacteria/Firmicutes/Clostridia/Clostridiales/Ruminococcaceae/Ruminococcaceae UCG-002	0	0	0	0	0	0	0	0	0	0	0	0	0	0	0	0	0	0	0	0	0	0	0	0	0	0	0	0	0	0	0	0	0	0	0	0	0	0	0	0	0	0	0	0	0
Bacteria/Firmicutes/Clostridia/Clostridiales/Ruminococcaceae/Ruminococcaceae UCG-004	0	0	0	0	0	0	0	0	0	0	0	0	0	0	0	0	0	0	0	0	0	0	0	0	0	0	0	0	0	0	0	0	0	0	0	0	0	0	0	0	0	0	0	0	0
Bacteria/Firmicutes/Clostridia/Clostridiales/Ruminococcaceae/Ruminococcaceae UCG-005	0	0	0	0	0	0	0	0	0	0	0	0	0	0	0	0	0	0	0	0	0	0	0	0	0	0	0	0	0	0	0	0	0	0	0	0	0	0	0	0	0	0	0	0	0
Bacteria/Firmicutes/Clostridia/Clostridiales/Ruminococcaceae/Ruminococcaceae UCG-008	0	0	0	0	0	0	0	0	0	0	0	0	0	0	0	0	0	0	0	0	0	0	0	0	0	0	0	0	0	0	0	0	0	0	0	0	0	0	0	0	0	0	0	0	0
Bacteria/Firmicutes/Clostridia/Clostridiales/Ruminococcaceae/Ruminococcaceae UCG-009	0	0	0	0	0	0	0	0	0	0	0	0	0	0	0	0	0	0	0	0	0	0	0	0	0	0	0	0	0	0	0	0	0	0	0	0	0	0	0	0	0	0	0	0	0
Bacteria/Firmicutes/Clostridia/Clostridiales/Ruminococcaceae/Ruminococcaceae UCG-010	0	0	0	0	0	0	0	0	0	0	0	0	0	0	0	0	0	0	0	0	0	0	0	0	0	0	0	0	0	0	0	0	0	0	0	0	0	0	0	0	0	0	0	0	0
Bacteria/Firmicutes/Clostridia/Clostridiales/Ruminococcaceae/Ruminococcaceae UCG-011	0	0	0	0	0	0	0	0	0	0	0	0	0	0	0	0	0	0	0	0	0	0	0	0	0	0	0	0	0	0	0	0	0	0	0	0	0	0	0	0	0	0	0	0	0
Bacteria/Firmicutes/Clostridia/Clostridiales/Ruminococcaceae/Ruminococcaceae UCG-012	0	0	0	0	0	0	0	0	0	0	0	0	0	0	0	0	0	0	0	0	0	0	0	0	0	0	0	0	0	0	0	0	0	0	0	0	0	0	0	0	0	0	0	0	0
Bacteria/Firmicutes/Clostridia/Clostridiales/Ruminococcaceae/Ruminococcaceae UCG-013	0	0	0	0	0	0	0	0	0	0	0	0	0	0	0	0	0	0	0	0	0	0	0	0	0	0	0	0	0	0	0	0	0	0	0	0	0	0	0	0	0	0	0	0	0
Bacteria/Firmicutes/Clostridia/Clostridiales/Ruminococcaceae/Ruminococcaceae UCG-014	0	0	0	0	0	0	0	0	0	0	0	0	0	0	0	0	0	0	0	0	0	0	0	0	0	0	0	0	0	0	0	0	0	0	0	0	0	0	0	0	0	0	0	0	0
Bacteria/Firmicutes/Clostridia/Clostridiales/Ruminococcaceae/Ruminococcus 1	0	0	0	0	0	0	0	0	0	0	0	0	0	0	0	0	0	0	0	0	0	0	0	0	0	0	0	0	0	0	0	0	0	0	0	0	0	0	0	0	0	0	0	0	0
Bacteria/Firmicutes/Clostridia/Clostridiales/Ruminococcaceae/Ruminococcus 2	0	0	0	0	0	0	0	0	0	0	0	0	0	0	0	0	0	0	0	0	0	0	0	0	0	0	0	0	0	0	0	0	0	0	0	0	0	0	0	0	0	0	0	0	0
Bacteria/Firmicutes/Clostridia/Clostridiales/Ruminococcaceae/Saccharofermentans	0	0	0	0	0	0	0	0	0	0	0	0	0	0	0	0	0	0	0	0	0	0	0	0	0	0	0	0	0	0	0	0	0	0	0	0	0	0	0	0	0	0	0	0	0
Bacteria/Firmicutes/Clostridia/Clostridiales/Ruminococcaceae/Subdoligranulum	0	0	0	0	0	0	0	0	0	0	0	0	0	0	0	0	0	0	0	0	0	0	0	0	0	0	0	0	0	0	0	0	0	0	0	0	0	0	0	0	0	0	0	0	0
Bacteria/Firmicutes/Clostridia/Clostridiales/Ruminococcaceae/UBA1819	0	0	0	0	0	0	0	0	0	0	0	0	0	0	0	0	0	0	0	0	0	0	0	0	0	0	0	0	0	0	0	0	0	0	0	0	0	0	0	0	0	0	0	0	0
Bacteria/Firmicutes/Clostridia/Clostridiales/Ruminococcaceae/uncultured	122	97	93	0	0	0	0	0	51	0	0	0	54	58	60	0	42	0	0	0	0	89	91	75	92	72	91	42	0	0	0	0	0	0	0	0	0	59	37	0	0	0	0	0	0
Bacteria/Firmicutes/Clostridia/Clostridiales/Syntrophomonadaceae/Candidatus Contubernalis	0	0	0	0	0	0	0	0	0	0	0	0	0	0	0	0	0	0	0	0	0	0	0	0	0	0	0	0	0	0	0	0	0	0	0	0	0	0	0	0	0	0	0	0	0
Bacteria/Firmicutes/Clostridia/Clostridiales/Syntrophomonadaceae/Dethiobacter	0	0	0	0	0	0	0	0	0	0	0	0	0	0	0	0	0	0	0	0	0	0	0	0	0	0	0	0	0	0	0	0	0	0	0	0	0	0	0	0	0	0	0	0	0
Bacteria/Firmicutes/Clostridia/Clostridiales/Syntrophomonadaceae/Pelospora	0	0	0	0	0	0	0	0	0	0	0	0	0	0	0	0	0	0	0	0	0	0	0	0	0	0	0	0	0	0	0	0	0	0	0	0	0	0	0	0	0	0	0	0	0
Bacteria/Firmicutes/Clostridia/Clostridiales/Syntrophomonadaceae/Syntrophomonas	0	0	0	0	0	0	0	0	0	0	0	0	0	0	0	0	0	0	0	0	0	0	0	0	0	0	0	0	0	0	0	0	0	0	0	0	0	0	0	0	0	0	0	0	0
Bacteria/Firmicutes/Clostridia/Clostridiales/Syntrophomonadaceae/Thermosyntropha	0	0	0	0	0	0	0	0	0	0	0	0	0	0	0	0	0	0	0	0	0	0	0	0	0	0	0	0	0	0	0	0	0	0	0	0	0	0	0	0	0	0	0	0	0
Bacteria/Firmicutes/Clostridia/Clostridiales/Syntrophomonadaceae/uncultured	0	0	0	0	0	0	0	0	0	0	0	0	0	0	0	0	0	0	0	0	0	0	0	0	0	0	0	0	0	0	0	0	0	0	0	0	0	0	0	0	0	0	0	0	0
Bacteria/Firmicutes/Clostridia/Natranaerobiales/Natranaerobiaceae/Natranaerobius	0	0	0	0	0	0	0	0	0	0	0	0	0	0	0	0	0	0	0	0	0	0	0	0	0	0	0	0	0	0	0	0	0	0	0	0	0	0	0	0	0	0	0	0	0
Bacteria/Firmicutes/Clostridia/Natranaerobiales/Natranaerobiaceae/Natronovirga	0	0	0	0	0	0	0	0	0	0	0	0	0	0	0	0	0	0	0	0	0	0	0	0	0	0	0	0	0	0	0	0	0	0	0	0	0	0	0	0	0	0	0	0	0
Bacteria/Firmicutes/Clostridia/Thermoanaerobacterales/Family III/Caldicellulosiruptor	0	0	0	0	0	0	0	0	0	0	0	0	0	0	0	0	0	0	0	0	0	0	0	0	0	0	0	0	0	0	0	0	0	0	0	0	0	0	0	0	0	0	0	0	0
Bacteria/Firmicutes/Clostridia/Thermoanaerobacterales/Family III/Tepidanaerobacter	0	0	0	0	0	0	0	0	0	0	0	0	0	0	0	0	0	0	0	0	0	0	0	0	0	0	0	0	0	0	0	0	0	0	0	0	0	0	0	0	0	0	0	0	0
Bacteria/Firmicutes/Clostridia/Thermoanaerobacterales/Family III/Thermoanaerobacterium	0	0	0	0	0	0	0	0	0	0	0	0	0	0	0	0	0	0	0	0	0	0	0	0	0	0	0	0	0	0	0	0	0	0	0	0	0	0	0	0	0	0	0	0	0
Bacteria/Firmicutes/Clostridia/Thermoanaerobacterales/Family III/uncultured	0	0	0	0	0	0	0	0	0	0	0	0	0	0	0	0	0	0	0	0	0	0	0	0	0	0	0	0	0	0	0	0	0	0	0	0	0	0	0	0	0	0	0	0	0
Bacteria/Firmicutes/Clostridia/Thermoanaerobacterales/Family IV/Mahella	0	0	0	0	0	0	0	0	0	0	0	0	0	0	0	0	0	0	0	0	0	0	0	0	0	0	0	0	0	0	0	0	0	0	0	0	0	0	0	0	0	0	0	0	0
Bacteria/Firmicutes/Clostridia/Thermoanaerobacterales/Thermoanaerobacteraceae/Caldanaerobacter	0	0	0	0	0	0	0	0	0	0	0	0	0	0	0	0	0	0	0	0	0	0	0	0	0	0	0	0	0	0	0	0	0	0	0	0	0	0	0	0	0	0	0	0	0
Bacteria/Firmicutes/Clostridia/Thermoanaerobacterales/Thermoanaerobacteraceae/Caldanaerobius	0	0	0	0	0	0	0	0	0	0	0	0	0	0	0	0	0	0	0	0	0	0	0	0	0	0	0	0	0	0	0	0	0	0	0	0	0	0	0	0	0	0	0	0	0
Bacteria/Firmicutes/Clostridia/Thermoanaerobacterales/Thermoanaerobacteraceae/Calderihabitans	0	0	0	0	0	0	0	0	0	0	0	0	0	0	0	0	0	0	0	0	0	0	0	0	0	0	0	0	0	0	0	0	0	0	0	0	0	0	0	0	0	0	0	0	0
Bacteria/Firmicutes/Clostridia/Thermoanaerobacterales/Thermoanaerobacteraceae/Caloribacterium	0	0	0	0	0	0	0	0	0	0	0	0	0	0	0	0	0	0	0	0	0	0	0	0	0	0	0	0	0	0	0	0	0	0	0	0	0	0	0	0	0	0	0	0	0
Bacteria/Firmicutes/Clostridia/Thermoanaerobacterales/Thermoanaerobacteraceae/Carboxydothermus	0	0	0	0	0	0	0	0	0	0	0	0	0	0	0	0	0	0	0	0	0	0	0	0	0	0	0	0	0	0	0	0	0	0	0	0	0	0	0	0	0	0	0	0	0
Bacteria/Firmicutes/Clostridia/Thermoanaerobacterales/Thermoanaerobacteraceae/Gelria	0	0	0	0	0	0	0	0	0	0	0	0	0	0	0	0	0	0	0	0	0	0	0	0	0	0	0	0	0	0	0	0	0	0	0	0	0	0	0	0	0	0	0	0	0
Bacteria/Firmicutes/Clostridia/Thermoanaerobacterales/Thermoanaerobacteraceae/Moorella	0	0	0	0	0	0	0	0	0	0	0	0	0	0	0	0	0	0	0	0	0	0	0	0	0	0	0	0	0	0	0	0	0	0	0	0	0	0	0	0	0	0	0	0	0
Bacteria/Firmicutes/Clostridia/Thermoanaerobacterales/Thermoanaerobacteraceae/Syntrophaceticus	0	0	0	0	0	0	0	0	0	0	0	0	0	0	0	0	0	0	0	0	0	0	0	0	0	0	0	0	0	0	0	0	0	0	0	0	0	0	0	0	0	0	0	0	0
Bacteria/Firmicutes/Clostridia/Thermoanaerobacterales/Thermoanaerobacteraceae/Thermoanaerobacter	0	0	0	0	0	0	0	0	0	0	0	0	0	0	0	0	0	0	0	0	0	0	0	0	0	0	0	0	0	0	0	0	0	0	0	0	0	0	0	0	0	0	0	0	0
Bacteria/Firmicutes/Clostridia/Thermoanaerobacterales/Thermoanaerobacteraceae/uncultured	0	0	0	0	0	0	0	0	0	0	0	0	0	0	0	0	0	0	0	0	0	0	0	0	0	0	0	0	0	0	0	0	0	0	0	0	0	0	0	0	0	0	0	0	0
Bacteria/Firmicutes/Clostridia/Thermoanaerobacterales/Thermodesulfobiaceae/Thermodesulfobium	0	0	0	0	0	0	0	0	0	0	0	0	0	0	0	0	0	0	0	0	0	0	0	0	0	0	0	0	0	0	0	0	0	0	0	0	0	0	0	0	0	0	0	0	0
Bacteria/Firmicutes/Erysipelotrichia/Erysipelotrichales/Erysipelotrichaceae/[Anaerorhabdus] furcosa group	0	0	0	0	0	0	0	0	0	0	0	0	0	0	0	0	0	0	0	0	0	0	0	0	0	0	0	0	0	0	0	0	0	0	0	0	0	0	0	0	0	0	0	0	0
Bacteria/Firmicutes/Erysipelotrichia/Erysipelotrichales/Erysipelotrichaceae/[Clostridium] innocuum group	0	0	0	0	0	0	0	0	0	0	0	0	0	0	0	0	0	0	0	0	0	0	0	0	0	0	0	0	0	0	0	0	0	0	0	0	0	0	0	0	0	0	0	0	0
Bacteria/Firmicutes/Erysipelotrichia/Erysipelotrichales/Erysipelotrichaceae/Allobaculum	0	0	0	0	0	0	0	0	0	0	0	0	0	0	0	0	0	0	0	0	0	0	0	0	0	0	0	0	0	0	0	0	0	0	0	0	0	0	0	0	0	0	0	0	0
Bacteria/Firmicutes/Erysipelotrichia/Erysipelotrichales/Erysipelotrichaceae/Asteroleplasma	0	0	0	0	0	0	0	0	0	0	0	0	0	0	0	0	0	0	0	0	0	0	0	0	0	0	0	0	0	0	0	0	0	0	0	0	0	0	0	0	0	0	0	0	0
Bacteria/Firmicutes/Erysipelotrichia/Erysipelotrichales/Erysipelotrichaceae/Candidatus Stoquefichus	0	0	0	0	0	0	0	0	0	0	0	0	0	0	0	0	0	0	0	0	0	0	0	0	0	0	0	0	0	0	0	0	0	0	0	0	0	0	0	0	0	0	0	0	0
Bacteria/Firmicutes/Erysipelotrichia/Erysipelotrichales/Erysipelotrichaceae/Catenibacterium	0	0	0	0	0	0	0	0	0	0	0	0	0	0	0	0	0	0	0	0	0	0	0	0	0	0	0	0	0	0	0	0	0	0	0	0	0	0	0	0	0	0	0	0	0
Bacteria/Firmicutes/Erysipelotrichia/Erysipelotrichales/Erysipelotrichaceae/Catenisphaera	0	0	0	0	0	0	0	0	0	0	0	0	0	0	0	0	0	0	0	0	0	0	0	0	0	0	0	0	0	0	0	0	0	0	0	0	0	0	0	0	0	0	0	0	0
Bacteria/Firmicutes/Erysipelotrichia/Erysipelotrichales/Erysipelotrichaceae/Dielma	0	0	0	0	0	0	0	0	0	0	0	0	0	0	0	0	0	0	0	0	0	0	0	0	0	0	0	0	0	0	0	0	0	0	0	0	0	0	0	0	0	0	0	0	0
Bacteria/Firmicutes/Erysipelotrichia/Erysipelotrichales/Erysipelotrichaceae/Dubosiella	0	0	0	0	0	0	0	0	0	0	0	0	0	0	0	0	0	0	0	0	0	0	0	0	0	0	0	0	0	0	0	0	0	0	0	0	0	0	0	0	0	0	0	0	0
Bacteria/Firmicutes/Erysipelotrichia/Erysipelotrichales/Erysipelotrichaceae/Erysipelatoclostridium	0	0	0	0	0	0	0	0	0	0	0	0	0	0	0	0	0	0	0	0	0	0	0	0	0	0	0	0	0	0	0	0	0	0	0	0	0	0	0	0	0	0	0	0	0
Bacteria/Firmicutes/Erysipelotrichia/Erysipelotrichales/Erysipelotrichaceae/Erysipelothrix	0	0	0	0	0	0	0	0	0	0	0	0	0	0	0	0	0	0	0	0	0	0	0	0	0	0	0	0	0	0	0	0	0	0	0	0	0	0	0	0	0	0	0	0	0
Bacteria/Firmicutes/Erysipelotrichia/Erysipelotrichales/Erysipelotrichaceae/Erysipelotrichaceae UCG-002	0	0	0	0	0	0	0	0	0	0	0	0	0	0	0	0	0	0	0	0	0	0	0	0	0	0	0	0	0	0	0	0	0	0	0	0	0	0	0	0	0	0	0	0	0
Bacteria/Firmicutes/Erysipelotrichia/Erysipelotrichales/Erysipelotrichaceae/Erysipelotrichaceae UCG-003	0	0	0	0	0	0	0	0	0	0	0	0	0	0	0	0	0	0	0	0	0	0	0	0	0	0	0	0	0	0	0	0	0	0	0	0	0	0	0	0	0	0	0	0	0
Bacteria/Firmicutes/Erysipelotrichia/Erysipelotrichales/Erysipelotrichaceae/Erysipelotrichaceae UCG-004	0	0	0	0	0	0	0	0	0	0	0	0	0	0	0	0	0	0	0	0	0	0	0	0	0	0	0	0	0	0	0	0	0	0	0	0	0	0	0	0	0	0	0	0	0
Bacteria/Firmicutes/Erysipelotrichia/Erysipelotrichales/Erysipelotrichaceae/Erysipelotrichaceae UCG-006	0	0	0	0	0	0	0	0	0	0	0	0	0	0	0	0	0	0	0	0	0	0	0	0	0	0	0	0	0	0	0	0	0	0	0	0	0	0	0	0	0	0	0	0	0
Bacteria/Firmicutes/Erysipelotrichia/Erysipelotrichales/Erysipelotrichaceae/Erysipelotrichaceae UCG-008	0	0	0	0	0	0	0	0	0	0	0	0	0	0	0	0	0	0	0	0	0	0	0	0	0	0	0	0	0	0	0	0	0	0	0	0	0	0	0	0	0	0	0	0	0
Bacteria/Firmicutes/Erysipelotrichia/Erysipelotrichales/Erysipelotrichaceae/Faecalibaculum	0	0	0	0	0	0	0	0	0	0	0	0	0	0	0	0	0	0	0	0	0	0	0	0	0	0	0	0	0	0	0	0	0	0	0	0	0	0	0	0	0	0	0	0	0
Bacteria/Firmicutes/Erysipelotrichia/Erysipelotrichales/Erysipelotrichaceae/Faecalitalea	0	0	0	0	0	0	0	0	0	0	0	0	0	0	0	0	0	0	0	0	0	0	0	0	0	0	0	0	0	0	0	0	0	0	0	0	0	0	0	0	0	0	0	0	0
Bacteria/Firmicutes/Erysipelotrichia/Erysipelotrichales/Erysipelotrichaceae/Holdemanella	0	0	0	0	0	0	0	0	0	0	0	0	0	0	0	0	0	0	0	0	0	0	0	0	0	0	0	0	0	0	0	0	0	0	0	0	0	0	0	0	0	0	0	0	0
Bacteria/Firmicutes/Erysipelotrichia/Erysipelotrichales/Erysipelotrichaceae/Ileibacterium	0	0	0	0	0	0	0	0	0	0	0	0	0	0	0	0	0	0	0	0	0	0	0	0	0	0	0	0	0	0	0	0	0	0	0	0	0	0	0	0	0	0	0	0	0
Bacteria/Firmicutes/Erysipelotrichia/Erysipelotrichales/Erysipelotrichaceae/Merdibacter	0	0	0	0	0	0	0	0	0	0	0	0	0	0	0	0	0	0	0	0	0	0	0	0	0	0	0	0	0	0	0	0	0	0	0	0	0	0	0	0	0	0	0	0	0
Bacteria/Firmicutes/Erysipelotrichia/Erysipelotrichales/Erysipelotrichaceae/Solobacterium	0	0	0	0	0	0	0	0	0	0	0	0	0	0	0	0	0	0	0	0	0	0	0	0	0	0	0	0	0	0	0	0	0	0	0	0	0	0	0	0	0	0	0	0	0
Bacteria/Firmicutes/Erysipelotrichia/Erysipelotrichales/Erysipelotrichaceae/Turicibacter	0	0	0	0	0	0	0	0	0	0	0	0	0	0	0	0	0	0	0	0	0	0	0	0	0	0	0	0	0	0	0	0	0	0	0	0	0	0	0	0	0	0	0	0	0
Bacteria/Firmicutes/Erysipelotrichia/Erysipelotrichales/Erysipelotrichaceae/uncultured	0	0	0	0	0	0	0	0	0	0	0	0	0	0	0	0	0	0	0	0	0	0	0	0	0	0	0	0	0	0	0	0	0	0	0	0	0	0	0	0	0	0	0	0	0
Bacteria/Firmicutes/Erysipelotrichia/Erysipelotrichales/Erysipelotrichaceae/ZOR0006	0	0	0	0	0	0	0	0	0	0	0	0	0	0	0	0	0	0	0	0	0	0	0	0	0	0	0	0	0	0	0	0	0	0	0	0	0	0	0	0	0	0	0	0	0
Bacteria/Firmicutes/Limnochordia/Limnochordales/Limnochordaceae/Limnochorda	0	0	0	0	0	0	0	0	0	0	0	0	0	0	0	0	0	0	0	0	0	0	0	0	0	0	0	0	0	0	0	0	0	0	0	0	0	0	0	0	0	0	0	0	0
Bacteria/Firmicutes/Negativicutes/Selenomonadales/Acidaminococcaceae/Acidaminococcus	0	0	0	0	0	0	0	0	0	0	0	0	0	0	0	0	0	0	0	0	0	0	0	0	0	0	0	0	0	0	0	0	0	0	0	0	0	0	0	0	0	0	0	0	0
Bacteria/Firmicutes/Negativicutes/Selenomonadales/Acidaminococcaceae/Phascolarctobacterium	0	0	0	0	0	0	0	0	0	0	0	0	0	0	0	0	0	0	0	0	0	0	0	0	0	0	0	0	0	0	0	0	0	0	0	0	0	0	0	0	0	0	0	0	0
Bacteria/Firmicutes/Negativicutes/Selenomonadales/Acidaminococcaceae/Succiniclasticum	0	0	0	0	0	0	0	0	0	0	0	0	0	0	0	0	0	0	0	0	0	0	0	0	0	0	0	0	0	0	0	0	0	0	0	0	0	0	0	0	0	0	0	0	0
Bacteria/Firmicutes/Negativicutes/Selenomonadales/Acidaminococcaceae/Succinispira	0	0	0	0	0	0	0	0	0	0	0	0	0	0	0	0	0	0	0	0	0	0	0	0	0	0	0	0	0	0	0	0	0	0	0	0	0	0	0	0	0	0	0	0	0
Bacteria/Firmicutes/Negativicutes/Selenomonadales/Acidaminococcaceae/uncultured	0	0	0	0	0	0	0	0	0	0	0	0	0	0	0	0	0	0	0	0	0	0	0	0	0	0	0	0	0	0	0	0	0	0	0	0	0	0	0	0	0	0	0	0	0
Bacteria/Firmicutes/Negativicutes/Selenomonadales/Veillonellaceae/Anaeroglobus	0	0	0	0	0	0	0	0	0	0	0	0	0	0	0	0	0	0	0	0	0	0	0	0	0	0	0	0	0	0	0	0	0	0	0	0	0	0	0	0	0	0	0	0	0
Bacteria/Firmicutes/Negativicutes/Selenomonadales/Veillonellaceae/Anaerosinus	0	0	0	0	0	0	0	0	0	0	0	0	0	0	0	0	0	0	0	0	0	0	0	0	0	0	0	0	0	0	0	0	0	0	0	0	0	0	0	0	0	0	0	0	0
Bacteria/Firmicutes/Negativicutes/Selenomonadales/Veillonellaceae/Anaerospora	0	0	0	0	0	0	0	0	0	0	0	0	0	0	0	0	0	0	0	0	0	0	0	0	0	0	0	0	0	0	0	0	0	0	0	0	0	0	0	0	0	0	0	0	0
Bacteria/Firmicutes/Negativicutes/Selenomonadales/Veillonellaceae/Anaerovibrio	0	0	0	0	0	0	0	0	0	0	0	0	0	0	0	0	0	0	0	0	0	0	0	0	0	0	0	0	0	0	0	0	0	0	0	0	0	0	0	0	0	0	0	0	0
Bacteria/Firmicutes/Negativicutes/Selenomonadales/Veillonellaceae/Dendrosporobacter	0	0	0	0	0	0	0	0	0	0	0	0	0	0	0	0	0	0	0	0	0	0	0	0	0	0	0	0	0	0	0	0	0	0	0	0	0	0	0	0	0	0	0	0	0
Bacteria/Firmicutes/Negativicutes/Selenomonadales/Veillonellaceae/Dialister	0	0	0	0	0	0	0	0	0	0	0	0	0	0	0	0	0	0	0	0	0	0	0	0	0	0	0	0	0	0	0	0	0	0	0	0	0	0	0	0	0	0	0	0	0
Bacteria/Firmicutes/Negativicutes/Selenomonadales/Veillonellaceae/Megamonas	0	0	0	0	0	0	0	0	0	0	0	0	0	0	0	0	0	0	0	0	0	0	0	0	0	0	0	0	0	0	0	0	0	0	0	0	0	0	0	0	0	0	0	0	0
Bacteria/Firmicutes/Negativicutes/Selenomonadales/Veillonellaceae/Megasphaera	0	0	0	0	0	0	0	0	0	0	0	0	0	0	0	0	0	0	0	0	0	0	0	0	0	0	0	0	0	0	0	0	0	0	0	0	0	0	0	0	0	0	0	0	0
Bacteria/Firmicutes/Negativicutes/Selenomonadales/Veillonellaceae/Negativicoccus	0	0	0	0	0	0	0	0	0	0	0	0	0	0	0	0	0	0	0	0	0	0	0	0	0	0	0	0	0	0	0	0	0	0	0	0	0	0	0	0	0	0	0	0	0
Bacteria/Firmicutes/Negativicutes/Selenomonadales/Veillonellaceae/Pelosinus	0	0	0	0	0	0	0	0	0	0	0	0	0	0	0	0	0	0	0	0	0	0	0	0	0	0	0	0	0	0	0	0	0	0	0	0	0	0	0	0	0	0	0	0	0
Bacteria/Firmicutes/Negativicutes/Selenomonadales/Veillonellaceae/Quinella	0	0	0	0	0	0	0	0	0	0	0	0	0	0	0	0	0	0	0	0	0	0	0	0	0	0	0	0	0	0	0	0	0	0	0	0	0	0	0	0	0	0	0	0	0
Bacteria/Firmicutes/Negativicutes/Selenomonadales/Veillonellaceae/Selenomonas 1	0	0	0	0	0	0	0	0	0	0	0	0	0	0	0	0	0	0	0	0	0	0	0	0	0	0	0	0	0	0	0	0	0	0	0	0	0	0	0	0	0	0	0	0	0
Bacteria/Firmicutes/Negativicutes/Selenomonadales/Veillonellaceae/Selenomonas 3	0	0	0	0	0	0	0	0	0	0	0	0	0	0	0	0	0	0	0	0	0	0	0	0	0	0	0	0	0	0	0	0	0	0	0	0	0	0	0	0	0	0	0	0	0
Bacteria/Firmicutes/Negativicutes/Selenomonadales/Veillonellaceae/Selenomonas 4	0	0	0	0	0	0	0	0	0	0	0	0	0	0	0	0	0	0	0	0	0	0	0	0	0	0	0	0	0	0	0	0	0	0	0	0	0	0	0	0	0	0	0	0	0
Bacteria/Firmicutes/Negativicutes/Selenomonadales/Veillonellaceae/Selenomonas	0	0	0	0	0	0	0	0	0	0	0	0	0	0	0	0	0	0	0	0	0	0	0	0	0	0	0	0	0	0	0	0	0	0	0	0	0	0	0	0	0	0	0	0	0
Bacteria/Firmicutes/Negativicutes/Selenomonadales/Veillonellaceae/Sporomusa	0	0	0	0	0	0	0	0	0	0	0	0	0	0	0	0	0	0	0	0	0	0	0	0	0	0	0	0	0	0	0	0	0	0	0	0	0	0	0	0	0	0	0	0	0
Bacteria/Firmicutes/Negativicutes/Selenomonadales/Veillonellaceae/uncultured	0	0	0	0	0	0	0	0	0	0	0	0	0	0	0	0	0	0	0	0	0	0	0	0	0	0	0	0	0	0	0	0	0	0	0	0	0	0	0	0	0	0	0	0	0
Bacteria/Firmicutes/Negativicutes/Selenomonadales/Veillonellaceae/Veillonella	0	0	0	0	0	0	0	0	0	0	0	0	0	0	0	0	0	0	0	0	0	0	0	0	0	0	0	0	0	0	0	0	0	0	0	0	0	0	0	0	0	0	0	0	0
Bacteria/Fusobacteria/Fusobacteriia/Fusobacteriales/Fusobacteriaceae/Cetobacterium	0	0	0	0	0	0	0	0	0	0	0	0	0	0	0	0	0	0	0	0	0	0	0	0	0	0	0	0	0	0	0	0	0	0	0	0	0	0	0	0	0	0	0	0	0
Bacteria/Fusobacteria/Fusobacteriia/Fusobacteriales/Fusobacteriaceae/Fusobacterium	0	0	0	0	0	0	0	0	0	0	0	0	0	0	0	0	0	0	0	0	0	0	0	0	0	0	0	0	0	0	0	0	0	0	0	0	0	0	0	0	0	0	0	0	0
Bacteria/Fusobacteria/Fusobacteriia/Fusobacteriales/Fusobacteriaceae/Ilyobacter	0	0	0	0	0	0	0	0	0	0	0	0	0	0	0	0	0	0	0	0	0	0	0	0	0	0	0	0	0	0	0	0	0	0	0	0	0	0	0	0	0	0	0	0	0
Bacteria/Fusobacteria/Fusobacteriia/Fusobacteriales/Fusobacteriaceae/Propionigenium	0	0	0	0	0	0	0	0	0	0	0	0	0	0	0	0	0	0	0	0	0	0	0	0	0	0	0	0	0	0	0	0	0	0	0	0	0	0	0	0	0	0	0	0	0
Bacteria/Fusobacteria/Fusobacteriia/Fusobacteriales/Fusobacteriaceae/Psychrilyobacter	0	0	0	0	0	0	0	0	0	0	0	0	0	0	0	0	0	0	0	0	0	0	0	0	0	0	0	0	0	0	0	0	0	0	0	0	0	0	0	0	0	0	0	0	0
Bacteria/Fusobacteria/Fusobacteriia/Fusobacteriales/Leptotrichiaceae/Hypnocyclicus	0	0	0	0	0	0	0	0	0	0	0	0	0	0	0	0	0	0	0	0	0	0	0	0	0	0	0	0	0	0	0	0	0	0	0	0	0	0	0	0	0	0	0	0	0
Bacteria/Fusobacteria/Fusobacteriia/Fusobacteriales/Leptotrichiaceae/Leptotrichia	0	0	0	0	0	0	0	0	0	0	0	0	0	0	0	0	0	0	0	0	0	0	0	0	0	0	0	0	0	0	0	0	0	0	0	0	0	0	0	0	0	0	0	0	0
Bacteria/Fusobacteria/Fusobacteriia/Fusobacteriales/Leptotrichiaceae/Oceanivirga	0	0	0	0	0	0	0	0	0	0	0	0	0	0	0	0	0	0	0	0	0	0	0	0	0	0	0	0	0	0	0	0	0	0	0	0	0	0	0	0	0	0	0	0	0
Bacteria/Fusobacteria/Fusobacteriia/Fusobacteriales/Leptotrichiaceae/Sebaldella	0	0	0	0	0	0	0	0	0	0	0	0	0	0	0	0	0	0	0	0	0	0	0	0	0	0	0	0	0	0	0	0	0	0	0	0	0	0	0	0	0	0	0	0	0
Bacteria/Fusobacteria/Fusobacteriia/Fusobacteriales/Leptotrichiaceae/Streptobacillus	0	0	0	0	0	0	0	0	0	0	0	0	0	0	0	0	0	0	0	0	0	0	0	0	0	0	0	0	0	0	0	0	0	0	0	0	0	0	0	0	0	0	0	0	0
Bacteria/Fusobacteria/Fusobacteriia/Fusobacteriales/Leptotrichiaceae/uncultured	0	0	0	0	0	0	0	0	0	0	0	0	0	0	0	0	0	0	0	0	0	0	0	0	0	0	0	0	0	0	0	0	0	0	0	0	0	0	0	0	0	0	0	0	0
Bacteria/Gemmatimonadetes/Gemmatimonadetes/Gemmatimonadales/Gemmatimonadaceae/Gemmatimonas	0	0	0	0	0	0	0	0	0	0	0	0	0	0	0	0	0	0	0	0	0	0	0	0	0	0	0	0	0	0	0	0	0	0	0	0	0	0	0	0	0	0	0	0	0
Bacteria/Gemmatimonadetes/Gemmatimonadetes/Gemmatimonadales/Gemmatimonadaceae/Gemmatirosa	0	0	0	0	0	0	0	0	0	0	0	0	0	0	0	0	0	0	0	0	0	0	0	0	0	0	0	0	0	0	0	0	0	0	0	0	0	0	0	0	0	0	0	0	0
Bacteria/Gemmatimonadetes/Gemmatimonadetes/Gemmatimonadales/Gemmatimonadaceae/uncultured	312	162	140	190	169	182	478	275	414	199	206	172	284	266	310	284	315	237	261	315	308	198	241	214	202	240	228	303	179	269	249	252	238	437	276	273	238	315	279	303	285	245	316	399	403
Bacteria/Halanaerobiaeota/Halanaerobiia/Halanaerobiales/Halanaerobiaceae/Halanaerobium	0	0	0	0	0	0	0	0	0	0	0	0	0	0	0	0	0	0	0	0	0	0	0	0	0	0	0	0	0	0	0	0	0	0	0	0	0	0	0	0	0	0	0	0	0
Bacteria/Halanaerobiaeota/Halanaerobiia/Halanaerobiales/Halanaerobiaceae/Halarsenatibacter	0	0	0	0	0	0	0	0	0	0	0	0	0	0	0	0	0	0	0	0	0	0	0	0	0	0	0	0	0	0	0	0	0	0	0	0	0	0	0	0	0	0	0	0	0
Bacteria/Halanaerobiaeota/Halanaerobiia/Halanaerobiales/Halanaerobiaceae/Halocella	0	0	0	0	0	0	0	0	0	0	0	0	0	0	0	0	0	0	0	0	0	0	0	0	0	0	0	0	0	0	0	0	0	0	0	0	0	0	0	0	0	0	0	0	0
Bacteria/Halanaerobiaeota/Halanaerobiia/Halanaerobiales/Halobacteroidaceae/Halanaerobacter	0	0	0	0	0	0	0	0	0	0	0	0	0	0	0	0	0	0	0	0	0	0	0	0	0	0	0	0	0	0	0	0	0	0	0	0	0	0	0	0	0	0	0	0	0
Bacteria/Halanaerobiaeota/Halanaerobiia/Halanaerobiales/Halobacteroidaceae/Halanaerobaculum	0	0	0	0	0	0	0	0	0	0	0	0	0	0	0	0	0	0	0	0	0	0	0	0	0	0	0	0	0	0	0	0	0	0	0	0	0	0	0	0	0	0	0	0	0
Bacteria/Halanaerobiaeota/Halanaerobiia/Halanaerobiales/Halobacteroidaceae/Halonatronum	0	0	0	0	0	0	0	0	0	0	0	0	0	0	0	0	0	0	0	0	0	0	0	0	0	0	0	0	0	0	0	0	0	0	0	0	0	0	0	0	0	0	0	0	0
Bacteria/Halanaerobiaeota/Halanaerobiia/Halanaerobiales/Halobacteroidaceae/Natroniella	0	0	0	0	0	0	0	0	0	0	0	0	0	0	0	0	0	0	0	0	0	0	0	0	0	0	0	0	0	0	0	0	0	0	0	0	0	0	0	0	0	0	0	0	0
Bacteria/Halanaerobiaeota/Halanaerobiia/Halanaerobiales/Halobacteroidaceae/Orenia	0	0	0	0	0	0	0	0	0	0	0	0	0	0	0	0	0	0	0	0	0	0	0	0	0	0	0	0	0	0	0	0	0	0	0	0	0	0	0	0	0	0	0	0	0
Bacteria/Halanaerobiaeota/Halanaerobiia/Halanaerobiales/Halobacteroidaceae/Selenihalanaerobacter	0	0	0	0	0	0	0	0	0	0	0	0	0	0	0	0	0	0	0	0	0	0	0	0	0	0	0	0	0	0	0	0	0	0	0	0	0	0	0	0	0	0	0	0	0
Bacteria/Halanaerobiaeota/Halanaerobiia/Halanaerobiales/Halobacteroidaceae/uncultured	0	0	0	0	0	0	0	0	0	0	0	0	0	0	0	0	0	0	0	0	0	0	0	0	0	0	0	0	0	0	0	0	0	0	0	0	0	0	0	0	0	0	0	0	0
Bacteria/Hydrogenedentes/Hydrogenedentia/Hydrogenedentiales/Hydrogenedensaceae/Candidatus Hydrogenedens	0	0	0	0	0	0	0	0	0	0	0	0	0	0	0	0	0	0	0	0	0	0	0	0	0	0	0	0	0	0	0	0	0	0	0	0	0	0	0	0	0	0	0	0	0
Bacteria/Kiritimatiellaeota/Kiritimatiellae/Kiritimatiellales/Kiritimatiellaceae/Kiritimatiella	0	0	0	0	0	0	0	0	0	0	0	0	0	0	0	0	0	0	0	0	0	0	0	0	0	0	0	0	0	0	0	0	0	0	0	0	0	0	0	0	0	0	0	0	0
Bacteria/Kiritimatiellaeota/Kiritimatiellae/Kiritimatiellales/Kiritimatiellaceae/MSBL3	127	60	62	31	59	27	32	15	12	12	0	0	57	54	57	16	14	0	13	13	39	44	60	69	62	77	72	51	26	62	12	15	0	17	23	18	52	51	57	12	11	0	16	25	21
Bacteria/Kiritimatiellaeota/Kiritimatiellae/Kiritimatiellales/Kiritimatiellaceae/R76-B128	188	81	73	82	67	56	71	50	61	33	22	18	169	119	166	46	38	21	46	45	43	49	77	66	68	105	82	79	51	48	24	19	33	33	35	28	58	78	87	18	29	31	34	39	38
Bacteria/Latescibacteria/Latescibacteria/Latescibacterales/Latescibacteraceae/Candidatus Latescibacter	113	50	0	0	0	0	111	0	0	0	0	0	0	0	0	0	0	0	0	0	128	0	0	0	0	0	0	75	0	0	0	0	0	0	0	0	0	82	0	0	0	0	0	116	84
Bacteria/Lentisphaerae/Lentisphaeria/Lentisphaerales/Lentisphaeraceae/Lentisphaera	0	0	0	0	0	0	0	0	0	0	0	0	0	0	0	0	0	0	0	0	0	0	0	0	0	0	0	0	0	0	0	0	0	0	0	0	0	0	0	0	0	0	0	0	0
Bacteria/Lentisphaerae/Lentisphaeria/Victivallales/Victivallaceae/Victivallis	0	0	0	0	0	0	0	0	0	0	0	0	0	0	0	0	0	0	0	0	0	0	0	0	0	0	0	0	0	0	0	0	0	0	0	0	0	0	0	0	0	0	0	0	0
Bacteria/Lentisphaerae/Oligosphaeria/Oligosphaerales/Oligosphaeraceae/ADurb.Bin063-2	0	0	0	0	0	0	0	0	0	0	0	0	0	0	0	0	0	0	0	0	0	0	0	0	0	0	0	0	0	0	0	0	0	0	0	0	0	0	0	0	0	0	0	0	0
Bacteria/Lentisphaerae/Oligosphaeria/Oligosphaerales/Oligosphaeraceae/horsej-a03	0	0	0	0	0	0	0	0	0	0	0	0	0	0	0	0	0	0	0	0	0	0	0	0	0	0	0	0	0	0	0	0	0	0	0	0	0	0	0	0	0	0	0	0	0
Bacteria/Lentisphaerae/Oligosphaeria/Oligosphaerales/Oligosphaeraceae/Oligosphaera	0	0	0	0	0	0	0	0	0	0	0	0	0	0	0	0	0	0	0	0	0	0	0	0	0	0	0	0	0	0	0	0	0	0	0	0	0	0	0	0	0	0	0	0	0
Bacteria/Lentisphaerae/Oligosphaeria/Oligosphaerales/Oligosphaeraceae/SBZC-1223	25	0	22	0	0	0	0	0	0	0	0	0	0	22	0	0	0	0	0	0	0	0	0	0	0	0	0	0	0	0	0	0	0	0	0	0	0	0	0	0	0	0	0	0	0
Bacteria/Lentisphaerae/Oligosphaeria/Oligosphaerales/Oligosphaeraceae/Z20	0	0	0	0	0	0	0	0	0	0	0	0	0	0	0	0	0	0	0	0	0	0	0	0	0	0	0	0	0	0	0	0	0	0	0	0	0	0	0	0	0	0	0	0	0
Bacteria/Modulibacteria/Moduliflexia/Moduliflexales/Moduliflexaceae/Candidatus Moduliflexus	0	0	0	0	0	0	0	0	0	0	0	0	0	0	0	0	0	0	0	0	0	0	0	0	0	0	0	0	0	0	0	0	0	0	0	0	0	0	0	0	0	0	0	0	0
Bacteria/Nitrospinae/Nitrospinia/Nitrospinales/Nitrospinaceae/LS-NOB	0	0	0	0	0	0	0	0	0	0	0	0	0	0	0	0	0	0	0	0	0	0	0	0	0	0	0	0	0	0	0	0	0	0	0	0	0	0	0	0	0	0	0	0	0
Bacteria/Nitrospinae/Nitrospinia/Nitrospinales/Nitrospinaceae/Nitrospina	83	69	39	35	33	44	67	56	51	46	34	30	68	57	63	42	33	0	39	59	70	37	43	33	33	44	42	57	33	35	36	41	25	56	39	58	38	35	44	28	36	41	49	67	62
Bacteria/Nitrospinae/Nitrospinia/Nitrospinales/Nitrospinaceae/uncultured	0	0	0	0	0	0	0	0	0	0	0	0	0	0	0	0	0	0	0	0	0	0	0	0	0	0	0	0	0	0	0	0	0	0	0	0	0	0	0	0	0	0	0	0	0
Bacteria/Nitrospirae/Nitrospira/Nitrospirales/Nitrospiraceae/Leptospirillum	0	0	0	0	0	0	0	0	0	0	0	0	0	0	0	0	0	0	0	0	0	0	0	0	0	0	0	0	0	0	0	0	0	0	0	0	0	0	0	0	0	0	0	0	0
Bacteria/Nitrospirae/Nitrospira/Nitrospirales/Nitrospiraceae/Nitrospira	189	129	101	65	96	97	225	185	198	108	103	97	111	108	85	178	175	105	208	175	146	132	154	137	125	208	150	208	134	147	149	164	179	255	152	148	187	179	124	243	223	249	176	172	201
Bacteria/Nitrospirae/Thermodesulfovibrionia/Magnetobacteriales/Magnetobacteriaceae/Candidatus Magnetobacterium	0	0	0	0	0	0	0	0	0	0	0	0	0	0	0	0	0	0	0	0	0	0	0	0	0	0	0	0	0	0	0	0	0	0	0	0	0	0	0	0	0	0	0	0	0
Bacteria/Nitrospirae/Thermodesulfovibrionia/Magnetobacteriales/Magnetobacteriaceae/Candidatus Magnetoovum	0	0	0	0	0	0	0	0	0	0	0	0	0	0	0	0	0	0	0	0	0	0	0	0	0	0	0	0	0	0	0	0	0	0	0	0	0	0	0	0	0	0	0	0	0
Bacteria/Nitrospirae/Thermodesulfovibrionia/Thermodesulfovibrionales/Thermodesulfovibrionaceae/Thermodesulfovibrio	0	0	0	0	0	0	0	0	0	0	0	0	0	0	0	0	0	0	0	0	0	0	0	0	0	0	0	0	0	0	0	0	0	0	0	0	0	0	0	0	0	0	0	0	0
Bacteria/Omnitrophicaeota/Omnitrophia/Omnitrophales/Omnitrophaceae/Candidatus Omnitrophus	375	161	146	108	132	185	184	134	142	122	105	142	186	189	193	97	85	0	172	121	172	88	137	118	134	175	133	212	133	177	131	90	81	207	158	163	233	213	233	124	119	171	169	192	189
Bacteria/Patescibacteria/Parcubacteria/Paceibacterales/Paceibacteraceae/Candidatus Paceibacter	0	0	0	0	0	0	0	0	0	0	0	0	0	0	0	0	0	0	0	0	0	0	0	0	0	0	0	0	0	0	0	0	0	0	0	0	0	0	0	0	0	0	0	0	0
Bacteria/Patescibacteria/Saccharimonadia/Saccharimonadales/Saccharimonadaceae/Candidatus Saccharimonas	0	0	0	0	0	0	0	0	0	0	0	0	0	0	0	0	0	0	0	0	0	0	0	0	0	0	0	0	0	0	0	0	0	0	0	0	0	0	0	0	0	0	0	0	0
Bacteria/Planctomycetes/Brocadiae/Brocadiales/Brocadiaceae/Candidatus Brocadia	0	0	0	0	0	0	0	0	0	0	0	0	0	0	0	0	0	0	0	0	0	0	0	0	0	0	0	0	0	0	0	0	0	0	0	0	0	0	0	0	0	0	0	0	0
Bacteria/Planctomycetes/Brocadiae/Brocadiales/Brocadiaceae/Candidatus Jettenia	0	0	0	0	0	0	0	0	0	0	0	0	0	0	0	0	0	0	0	0	0	0	0	0	0	0	0	0	0	0	0	0	0	0	0	0	0	0	0	0	0	0	0	0	0
Bacteria/Planctomycetes/Brocadiae/Brocadiales/Brocadiaceae/Candidatus Kuenenia	0	0	0	0	0	0	0	0	0	0	0	0	0	0	0	0	0	0	0	0	0	0	0	0	0	0	0	0	0	0	0	0	0	0	0	0	0	0	0	0	0	0	0	0	0
Bacteria/Planctomycetes/Brocadiae/Brocadiales/Scalinduaceae/Candidatus Scalindua	0	0	0	0	0	0	0	0	0	0	0	0	0	0	0	0	0	0	0	0	0	0	0	0	0	0	0	0	0	0	0	0	0	0	0	0	0	0	0	0	0	0	0	0	0
Bacteria/Planctomycetes/Phycisphaerae/Phycisphaerales/Phycisphaeraceae/AKYG587	0	0	0	0	0	0	0	0	0	0	0	0	0	0	0	0	0	0	0	0	0	0	0	0	0	0	0	0	0	0	0	0	0	0	0	0	0	0	0	0	0	0	0	0	0
Bacteria/Planctomycetes/Phycisphaerae/Phycisphaerales/Phycisphaeraceae/Algisphaera	0	0	0	0	0	0	0	0	0	0	0	0	0	0	0	0	0	0	0	0	0	0	0	0	0	0	0	0	0	0	0	0	0	0	0	0	0	0	0	0	0	0	0	0	0
Bacteria/Planctomycetes/Phycisphaerae/Phycisphaerales/Phycisphaeraceae/CL500-3	59	25	35	23	0	0	17	0	18	26	29	19	32	25	36	0	26	0	31	17	0	0	0	17	0	0	0	0	0	0	0	0	0	0	0	0	16	0	0	0	0	0	0	0	0
Bacteria/Planctomycetes/Phycisphaerae/Phycisphaerales/Phycisphaeraceae/FS140-16B-02 marine group	0	0	0	0	0	0	0	0	0	0	0	0	0	0	0	0	0	0	0	0	0	0	0	0	0	0	0	0	0	0	0	0	0	0	0	0	0	0	0	0	0	0	0	0	0
Bacteria/Planctomycetes/Phycisphaerae/Phycisphaerales/Phycisphaeraceae/I-8	0	0	0	0	0	0	0	0	0	0	0	0	0	0	0	0	0	0	0	0	0	0	0	0	0	0	0	0	0	0	0	0	0	0	0	0	0	0	0	0	0	0	0	0	0
Bacteria/Planctomycetes/Phycisphaerae/Phycisphaerales/Phycisphaeraceae/JL-ETNP-F27	0	0	0	0	0	0	0	0	0	0	0	0	0	0	0	0	0	0	0	0	0	0	0	0	0	0	0	0	0	0	0	0	0	0	0	0	0	0	0	0	0	0	0	0	0
Bacteria/Planctomycetes/Phycisphaerae/Phycisphaerales/Phycisphaeraceae/Phycisphaera	0	0	0	0	0	0	0	0	0	0	0	0	0	0	0	0	0	0	0	0	0	0	0	0	0	0	0	0	0	0	0	0	0	0	0	0	0	0	0	0	0	0	0	0	0
Bacteria/Planctomycetes/Phycisphaerae/Phycisphaerales/Phycisphaeraceae/SM1A02	45	21	20	0	0	29	22	19	38	0	21	29	21	24	27	24	27	23	29	28	28	0	0	12	0	0	0	0	21	0	0	0	0	20	0	20	15	0	15	13	0	21	24	18	19
Bacteria/Planctomycetes/Phycisphaerae/Phycisphaerales/Phycisphaeraceae/uncultured	26	14	0	15	0	0	43	29	23	0	19	13	16	0	0	19	0	0	0	14	0	27	23	20	0	28	24	26	0	0	30	0	26	30	25	17	0	0	22	15	21	32	26	48	36
Bacteria/Planctomycetes/Phycisphaerae/Phycisphaerales/Phycisphaeraceae/Urania-1B-19 marine sediment group	0	0	0	0	0	0	16	0	0	0	0	0	18	0	0	0	15	0	0	0	0	0	0	0	0	0	0	0	0	0	0	0	0	0	0	0	0	0	0	17	0	0	0	0	0
Bacteria/Planctomycetes/Phycisphaerae/Phycisphaerales/Phycisphaeraceae/Z195MB87	0	0	0	0	0	0	0	0	0	0	0	0	0	0	0	0	0	0	0	0	0	0	0	0	0	0	0	0	0	0	0	0	0	0	0	0	0	0	0	0	0	0	0	0	0
Bacteria/Planctomycetes/Phycisphaerae/Tepidisphaerales/Tepidisphaeraceae/Tepidisphaera	0	0	0	0	0	0	0	0	0	0	0	0	0	0	0	0	0	0	0	0	0	0	0	0	0	0	0	0	0	0	0	0	0	0	0	0	0	0	0	0	0	0	0	0	0
Bacteria/Planctomycetes/Planctomycetacia/Gemmatales/Gemmataceae/Fimbriiglobus	0	0	0	0	0	0	0	0	0	0	0	0	0	0	0	0	0	0	0	0	0	0	0	0	0	0	0	0	0	0	0	0	0	0	0	0	0	0	0	0	0	0	0	0	0
Bacteria/Planctomycetes/Planctomycetacia/Gemmatales/Gemmataceae/Gemmata	0	0	0	0	0	0	0	0	0	0	0	0	0	0	0	0	0	0	0	0	0	0	0	0	0	0	0	0	0	0	0	0	0	0	0	0	0	0	0	0	0	0	0	0	0
Bacteria/Planctomycetes/Planctomycetacia/Gemmatales/Gemmataceae/Telmatocola	0	0	0	0	0	0	0	0	0	0	0	0	0	0	0	0	0	0	0	0	0	0	0	0	0	0	0	0	0	0	0	0	0	0	0	0	0	0	0	0	0	0	0	0	0
Bacteria/Planctomycetes/Planctomycetacia/Gemmatales/Gemmataceae/uncultured	13	0	0	0	0	0	0	0	0	0	0	0	0	0	0	0	0	0	0	0	0	0	0	0	0	0	0	0	0	0	0	0	0	0	0	0	0	0	0	0	0	0	0	0	0
Bacteria/Planctomycetes/Planctomycetacia/Isosphaerales/Isosphaeraceae/Aquisphaera	0	0	0	0	0	0	0	0	0	0	0	0	0	0	0	0	0	0	0	0	0	0	0	0	0	0	0	0	0	0	0	0	0	0	0	0	0	0	0	0	0	0	0	0	0
Bacteria/Planctomycetes/Planctomycetacia/Isosphaerales/Isosphaeraceae/Candidatus Nostocoida	0	0	0	0	0	0	0	0	0	0	0	0	0	0	0	0	0	0	0	0	0	0	0	0	0	0	0	0	0	0	0	0	0	0	0	0	0	0	0	0	0	0	0	0	0
Bacteria/Planctomycetes/Planctomycetacia/Isosphaerales/Isosphaeraceae/Isosphaera	0	0	0	0	0	0	0	0	0	0	0	0	0	0	0	0	0	0	0	0	0	0	0	0	0	0	0	0	0	0	0	0	0	0	0	0	0	0	0	0	0	0	0	0	0
Bacteria/Planctomycetes/Planctomycetacia/Isosphaerales/Isosphaeraceae/Paludisphaera	0	0	0	0	0	0	0	0	0	0	0	0	0	0	0	0	0	0	0	0	0	0	0	0	0	0	0	0	0	0	0	0	0	0	0	0	0	0	0	0	0	0	0	0	0
Bacteria/Planctomycetes/Planctomycetacia/Isosphaerales/Isosphaeraceae/Singulisphaera	0	0	0	0	0	0	0	0	0	0	0	0	0	0	0	0	0	0	0	0	0	0	0	0	0	0	0	0	0	0	0	0	0	0	0	0	0	0	0	0	0	0	0	0	0
Bacteria/Planctomycetes/Planctomycetacia/Isosphaerales/Isosphaeraceae/uncultured	0	0	0	0	0	0	11	0	0	0	0	0	0	0	0	0	0	0	0	0	0	0	0	0	0	0	0	0	0	0	0	0	0	0	0	0	0	0	0	0	0	0	0	0	0
Bacteria/Planctomycetes/Planctomycetacia/Pirellulales/Pirellulaceae/Blastopirellula	0	18	0	17	0	0	35	0	25	0	0	23	0	17	20	23	18	15	0	23	0	16	0	21	0	0	21	32	24	0	26	0	0	30	34	27	0	19	0	32	29	0	19	0	36
Bacteria/Planctomycetes/Planctomycetacia/Pirellulales/Pirellulaceae/Bythopirellula	0	0	0	0	0	0	0	0	0	0	0	0	0	0	0	0	0	0	0	0	0	0	0	0	0	0	0	0	0	0	0	0	0	0	0	0	0	0	0	0	0	0	0	0	0
Bacteria/Planctomycetes/Planctomycetacia/Pirellulales/Pirellulaceae/Candidatus Anammoximicrobium	0	0	0	0	0	0	0	0	0	0	0	0	0	0	0	0	0	0	0	0	0	0	0	0	0	0	0	0	0	0	0	0	13	13	0	0	0	0	0	0	0	0	0	0	0
Bacteria/Planctomycetes/Planctomycetacia/Pirellulales/Pirellulaceae/CPla-4 termite group	0	0	0	0	0	0	0	0	0	0	0	0	0	0	0	0	0	0	0	0	0	0	0	0	0	0	0	0	0	0	0	0	0	0	0	0	0	0	0	0	0	0	0	0	0
Bacteria/Planctomycetes/Planctomycetacia/Pirellulales/Pirellulaceae/p-1088-a5 gut group	0	0	0	0	0	0	0	0	0	0	0	0	0	0	0	0	0	0	0	0	0	0	0	0	0	0	0	0	0	0	0	0	0	0	0	0	0	0	0	0	0	0	0	0	0
Bacteria/Planctomycetes/Planctomycetacia/Pirellulales/Pirellulaceae/Pir1 lineage	0	0	0	0	0	0	0	0	0	0	0	0	0	0	0	0	0	0	0	0	0	0	0	0	0	0	0	0	0	0	0	0	0	0	0	0	0	0	0	0	0	0	0	0	0
Bacteria/Planctomycetes/Planctomycetacia/Pirellulales/Pirellulaceae/Pir2 lineage	0	0	0	0	0	0	0	0	0	0	0	0	0	0	0	0	0	0	0	0	0	0	0	0	0	0	0	0	0	0	0	0	0	0	0	0	0	0	0	0	0	0	0	0	0
Bacteria/Planctomycetes/Planctomycetacia/Pirellulales/Pirellulaceae/Pir3 lineage	0	0	0	0	0	0	0	0	0	0	0	0	0	0	0	0	0	0	0	0	0	0	0	0	0	0	0	0	0	0	0	0	0	0	0	0	0	0	0	0	0	0	0	0	0
Bacteria/Planctomycetes/Planctomycetacia/Pirellulales/Pirellulaceae/Pir4 lineage	76	0	56	0	0	93	92	50	93	0	0	54	120	0	116	61	0	0	64	70	72	0	0	102	57	68	0	80	57	77	41	0	40	65	68	61	68	78	0	0	42	38	56	52	60
Bacteria/Planctomycetes/Planctomycetacia/Pirellulales/Pirellulaceae/Pirellula	0	0	0	0	0	18	24	17	22	17	17	0	0	0	0	0	0	0	15	32	21	0	20	19	15	0	0	0	14	0	23	0	0	39	20	32	17	0	18	0	0	29	16	18	0
Bacteria/Planctomycetes/Planctomycetacia/Pirellulales/Pirellulaceae/Rhodopirellula	81	40	30	32	40	38	100	60	83	57	33	34	44	46	54	73	84	45	50	61	56	48	68	54	44	71	91	52	46	66	29	63	36	85	63	72	40	57	44	71	74	53	67	68	68
Bacteria/Planctomycetes/Planctomycetacia/Pirellulales/Pirellulaceae/Roseimaritima	0	0	0	0	0	0	0	0	0	0	0	0	0	0	0	0	0	0	0	0	0	0	0	0	0	0	0	0	0	0	0	0	0	0	0	0	0	0	0	0	0	0	0	0	0
Bacteria/Planctomycetes/Planctomycetacia/Pirellulales/Pirellulaceae/Rubripirellula	0	0	0	0	0	0	0	0	0	0	0	0	0	0	0	0	0	0	0	0	0	0	0	0	0	0	0	0	0	0	0	0	0	0	0	0	0	0	0	0	0	0	0	0	0
Bacteria/Planctomycetes/Planctomycetacia/Pirellulales/Pirellulaceae/Termite planctomycete cluster	0	0	0	0	0	0	0	0	0	0	0	0	0	0	0	0	0	0	0	0	0	0	0	0	0	0	0	0	0	0	0	0	0	0	0	0	0	0	0	0	0	0	0	0	0
Bacteria/Planctomycetes/Planctomycetacia/Pirellulales/Pirellulaceae/Thermogutta	0	0	0	0	0	0	0	0	0	0	0	0	0	0	0	0	0	0	0	0	0	0	0	0	0	0	0	0	0	0	0	0	0	0	0	0	0	0	0	0	0	0	0	0	0
Bacteria/Planctomycetes/Planctomycetacia/Pirellulales/Pirellulaceae/Thermostilla	0	0	0	0	0	0	0	0	0	0	0	0	0	0	0	0	0	0	0	0	0	0	0	0	0	0	0	0	0	0	0	0	0	0	0	0	0	0	0	0	0	0	0	0	0
Bacteria/Planctomycetes/Planctomycetacia/Pirellulales/Pirellulaceae/uncultured	51	29	23	17	0	0	56	31	43	0	26	32	29	46	39	36	39	25	35	38	30	23	29	26	26	25	42	42	14	15	36	30	32	56	30	53	23	21	18	19	26	33	31	36	38
Bacteria/Planctomycetes/Planctomycetacia/Planctomycetales/Gimesiaceae/Gimesia	0	0	0	0	0	0	0	0	0	0	0	0	0	0	0	0	0	0	0	0	0	0	0	0	0	0	0	0	0	0	0	0	0	0	0	0	0	0	0	0	0	0	0	0	0
Bacteria/Planctomycetes/Planctomycetacia/Planctomycetales/Gimesiaceae/uncultured	0	0	0	0	0	0	0	0	0	0	0	0	0	0	0	0	0	0	0	0	0	0	0	0	0	0	0	0	0	0	0	0	0	0	0	0	0	0	0	0	0	0	0	0	0
Bacteria/Planctomycetes/Planctomycetacia/Planctomycetales/Rubinisphaeraceae/Fuerstia	0	0	0	0	0	0	0	0	0	0	0	0	0	0	0	0	0	0	0	0	0	0	0	0	0	0	0	0	0	0	0	0	0	0	0	0	0	0	0	0	0	0	0	0	0
Bacteria/Planctomycetes/Planctomycetacia/Planctomycetales/Rubinisphaeraceae/Planctomicrobium	0	0	0	0	0	0	0	0	0	0	0	0	0	0	0	0	0	0	0	0	0	0	0	0	0	0	0	0	0	0	0	0	0	0	0	0	0	0	0	0	0	0	0	0	0
Bacteria/Planctomycetes/Planctomycetacia/Planctomycetales/Rubinisphaeraceae/Rubinisphaera	0	0	0	0	0	0	0	0	0	0	0	0	0	0	0	0	0	0	0	0	0	0	0	0	0	0	0	0	0	0	0	0	0	0	0	0	0	0	0	0	0	0	0	0	0
Bacteria/Planctomycetes/Planctomycetacia/Planctomycetales/Rubinisphaeraceae/SH-PL14	0	0	0	0	0	0	0	0	0	0	0	0	0	0	0	0	0	0	0	0	0	0	0	0	0	0	0	0	0	0	0	0	0	0	0	0	0	0	0	0	0	0	0	0	0
Bacteria/Planctomycetes/Planctomycetacia/Planctomycetales/Rubinisphaeraceae/uncultured	0	0	0	0	0	0	0	0	20	0	0	0	0	0	0	0	0	0	0	0	0	0	22	0	0	23	0	19	0	0	0	0	0	28	0	0	21	0	0	0	22	0	21	0	0
Bacteria/Planctomycetes/Planctomycetacia/Planctomycetales/Schlesneriaceae/Planctopirus	0	0	0	0	0	0	0	0	0	0	0	0	0	0	0	0	0	0	0	0	0	0	0	0	0	0	0	0	0	0	0	0	0	0	0	0	0	0	0	0	0	0	0	0	0
Bacteria/Planctomycetes/Planctomycetacia/Planctomycetales/Schlesneriaceae/Schlesneria	0	0	0	0	0	0	0	0	0	0	0	0	0	0	0	0	0	0	0	0	0	0	0	0	0	0	0	0	0	0	0	0	0	0	0	0	0	0	0	0	0	0	0	0	0
Bacteria/Proteobacteria/Alphaproteobacteria/Acetobacterales/Acetobacteraceae/Acetobacter	0	0	0	0	0	0	0	0	0	0	0	0	0	0	0	0	0	0	0	0	0	0	0	0	0	0	0	0	0	0	0	0	0	0	0	0	0	0	0	0	0	0	0	0	0
Bacteria/Proteobacteria/Alphaproteobacteria/Acetobacterales/Acetobacteraceae/Acidiphilium	0	0	0	0	0	0	0	0	0	0	0	0	0	0	0	0	0	0	0	0	0	0	0	0	0	0	0	0	0	0	0	0	0	0	0	0	0	0	0	0	0	0	0	0	0
Bacteria/Proteobacteria/Alphaproteobacteria/Acetobacterales/Acetobacteraceae/Acidocella	0	0	0	0	0	0	0	0	0	0	0	0	0	0	0	0	0	0	0	0	0	0	0	0	0	0	0	0	0	0	0	0	0	0	0	0	0	0	0	0	0	0	0	0	0
Bacteria/Proteobacteria/Alphaproteobacteria/Acetobacterales/Acetobacteraceae/Asaia	0	0	0	0	0	0	0	0	0	0	0	0	0	0	0	0	0	0	0	0	0	0	0	0	0	0	0	0	0	0	0	0	0	0	0	0	0	0	0	0	0	0	0	0	0
Bacteria/Proteobacteria/Alphaproteobacteria/Acetobacterales/Acetobacteraceae/Belnapia	0	0	0	0	0	0	0	0	0	0	0	0	0	0	0	0	0	0	0	0	0	0	0	0	0	0	0	0	0	0	0	0	0	0	0	0	0	0	0	0	0	0	0	0	0
Bacteria/Proteobacteria/Alphaproteobacteria/Acetobacterales/Acetobacteraceae/Bombella	0	0	0	0	0	0	0	0	0	0	0	0	0	0	0	0	0	0	0	0	0	0	0	0	0	0	0	0	0	0	0	0	0	0	0	0	0	0	0	0	0	0	0	0	0
Bacteria/Proteobacteria/Alphaproteobacteria/Acetobacterales/Acetobacteraceae/Craurococcus	0	0	0	0	0	0	0	0	0	0	0	0	0	0	0	0	0	0	0	0	0	0	0	0	0	0	0	0	0	0	0	0	0	0	0	0	0	0	0	0	0	0	0	0	0
Bacteria/Proteobacteria/Alphaproteobacteria/Acetobacterales/Acetobacteraceae/Endobacter	0	0	0	0	0	0	0	0	0	0	0	0	0	0	0	0	0	0	0	0	0	0	0	0	0	0	0	0	0	0	0	0	0	0	0	0	0	0	0	0	0	0	0	0	0
Bacteria/Proteobacteria/Alphaproteobacteria/Acetobacterales/Acetobacteraceae/Gluconobacter	0	0	0	0	0	0	0	0	0	0	0	0	0	0	0	0	0	0	0	0	0	0	0	0	0	0	0	0	0	0	0	0	0	0	0	0	0	0	0	0	0	0	0	0	0
Bacteria/Proteobacteria/Alphaproteobacteria/Acetobacterales/Acetobacteraceae/Humitalea	0	0	0	0	0	0	0	0	0	0	0	0	0	0	0	0	0	0	0	0	0	0	0	0	0	0	0	0	0	0	0	0	0	0	0	0	0	0	0	0	0	0	0	0	0
Bacteria/Proteobacteria/Alphaproteobacteria/Acetobacterales/Acetobacteraceae/Komagataeibacter	0	0	0	0	0	0	0	0	0	0	0	0	0	0	0	0	0	0	0	0	0	0	0	0	0	0	0	0	0	0	0	0	0	0	0	0	0	0	0	0	0	0	0	0	0
Bacteria/Proteobacteria/Alphaproteobacteria/Acetobacterales/Acetobacteraceae/Neokomagataea	0	0	0	0	0	0	0	0	0	0	0	0	0	0	0	0	0	0	0	0	0	0	0	0	0	0	0	0	0	0	0	0	0	0	0	0	0	0	0	0	0	0	0	0	0
Bacteria/Proteobacteria/Alphaproteobacteria/Acetobacterales/Acetobacteraceae/Nguyenibacter	0	0	0	0	0	0	0	0	0	0	0	0	0	0	0	0	0	0	0	0	0	0	0	0	0	0	0	0	0	0	0	0	0	0	0	0	0	0	0	0	0	0	0	0	0
Bacteria/Proteobacteria/Alphaproteobacteria/Acetobacterales/Acetobacteraceae/Rhodopila	0	0	0	0	0	0	0	0	0	0	0	0	0	0	0	0	0	0	0	0	0	0	0	0	0	0	0	0	0	0	0	0	0	0	0	0	0	0	0	0	0	0	0	0	0
Bacteria/Proteobacteria/Alphaproteobacteria/Acetobacterales/Acetobacteraceae/Rhodovastum	0	0	0	0	0	0	0	0	0	0	0	0	0	0	0	0	0	0	0	0	0	0	0	0	0	0	0	0	0	0	0	0	0	0	0	0	0	0	0	0	0	0	0	0	0
Bacteria/Proteobacteria/Alphaproteobacteria/Acetobacterales/Acetobacteraceae/Roseococcus	0	0	0	0	0	0	0	0	0	0	0	0	0	0	0	0	0	0	0	0	0	0	0	0	0	0	0	0	0	0	0	0	0	0	0	0	0	0	0	0	0	0	0	0	0
Bacteria/Proteobacteria/Alphaproteobacteria/Acetobacterales/Acetobacteraceae/Roseomonas	0	0	0	0	0	0	0	0	0	0	0	0	0	0	0	0	0	0	0	0	0	0	0	0	0	0	0	0	0	0	0	0	0	0	0	0	0	0	0	0	0	0	0	0	0
Bacteria/Proteobacteria/Alphaproteobacteria/Acetobacterales/Acetobacteraceae/Rubritepida	0	0	0	0	0	0	0	0	0	0	0	0	0	0	0	0	0	0	0	0	0	0	0	0	0	0	0	0	0	0	0	0	0	0	0	0	0	0	0	0	0	0	0	0	0
Bacteria/Proteobacteria/Alphaproteobacteria/Acetobacterales/Acetobacteraceae/uncultured	0	0	0	0	0	0	0	0	0	0	0	0	0	0	0	0	0	0	0	0	0	0	0	0	0	0	0	0	0	0	0	0	0	0	0	0	0	0	0	0	0	0	0	0	0
Bacteria/Proteobacteria/Alphaproteobacteria/Acetobacterales/Acetobacterales Incertae Sedis/uncultured	0	0	0	0	0	0	0	0	0	0	0	0	0	0	0	0	0	0	0	0	0	0	0	0	0	0	0	0	0	0	0	0	0	0	0	0	0	0	0	0	0	0	0	0	0
Bacteria/Proteobacteria/Alphaproteobacteria/Alphaproteobacteria Incertae Sedis/Unknown Family/Meganema	0	0	0	0	0	0	0	0	0	0	0	0	0	0	0	0	0	0	0	0	0	0	0	0	0	0	0	0	0	0	0	0	0	0	0	0	0	0	0	0	0	0	0	0	0
Bacteria/Proteobacteria/Alphaproteobacteria/Alphaproteobacteria Incertae Sedis/Unknown Family/uncultured	0	0	0	0	0	0	0	0	0	0	0	0	0	0	0	0	0	0	0	0	0	0	0	0	0	0	0	0	0	0	0	0	0	0	0	0	0	0	0	0	0	0	0	0	0
Bacteria/Proteobacteria/Alphaproteobacteria/Azospirillales/Azospirillaceae/Azospirillum	0	0	0	0	0	0	0	0	0	0	0	0	0	0	0	0	0	0	0	0	0	0	0	0	0	0	0	0	0	0	0	0	0	0	0	0	0	0	0	0	0	0	0	0	0
Bacteria/Proteobacteria/Alphaproteobacteria/Azospirillales/Azospirillaceae/Desertibacter	0	0	0	0	0	0	0	0	0	0	0	0	0	0	0	0	0	0	0	0	0	0	0	0	0	0	0	0	0	0	0	0	0	0	0	0	0	0	0	0	0	0	0	0	0
Bacteria/Proteobacteria/Alphaproteobacteria/Azospirillales/Azospirillaceae/Niveispirillum	0	0	0	0	0	0	0	0	0	0	0	0	0	0	0	0	0	0	0	0	0	0	0	0	0	0	0	0	0	0	0	0	0	0	0	0	0	0	0	0	0	0	0	0	0
Bacteria/Proteobacteria/Alphaproteobacteria/Azospirillales/Azospirillaceae/Skermanella	0	0	0	0	0	0	0	0	0	0	0	0	0	0	0	0	0	0	0	0	0	0	0	0	0	0	0	0	0	0	0	0	0	0	0	0	0	0	0	0	0	0	0	0	0
Bacteria/Proteobacteria/Alphaproteobacteria/Azospirillales/Azospirillaceae/uncultured	0	0	0	0	0	0	0	0	0	0	0	0	0	0	0	0	0	0	0	0	0	0	0	0	0	0	0	0	0	0	0	0	0	0	0	0	0	0	0	0	0	0	0	0	0
Bacteria/Proteobacteria/Alphaproteobacteria/Azospirillales/Azospirillales Incertae Sedis/Stella	0	0	0	0	0	0	0	0	0	0	0	0	0	0	0	0	0	0	0	0	0	0	0	0	0	0	0	0	0	0	0	0	0	0	0	0	0	0	0	0	0	0	0	0	0
Bacteria/Proteobacteria/Alphaproteobacteria/Azospirillales/Inquilinaceae/Inquilinus	0	0	0	0	0	0	0	0	0	0	0	0	0	0	0	0	0	0	0	0	0	0	0	0	0	0	0	0	0	0	0	0	0	0	0	0	0	0	0	0	0	0	0	0	0
Bacteria/Proteobacteria/Alphaproteobacteria/Caedibacterales/Caedibacteraceae/Caedibacter	0	0	0	0	0	0	0	0	0	0	0	0	0	0	0	0	0	0	0	0	0	0	0	0	0	0	0	0	0	0	0	0	0	0	0	0	0	0	0	0	0	0	0	0	0
Bacteria/Proteobacteria/Alphaproteobacteria/Caedibacterales/Caedibacteraceae/Candidatus Nucleicultrix	0	0	0	0	0	0	0	0	0	0	0	0	0	0	0	0	0	0	0	0	0	0	0	0	0	0	0	0	0	0	0	0	0	0	0	0	0	0	0	0	0	0	0	0	0
Bacteria/Proteobacteria/Alphaproteobacteria/Caedibacterales/Caedibacteraceae/uncultured	0	0	0	0	0	0	0	0	0	0	0	0	0	0	0	0	0	0	0	0	0	0	0	0	0	0	0	0	0	0	0	0	0	0	0	0	0	0	0	0	0	0	0	0	0
Bacteria/Proteobacteria/Alphaproteobacteria/Caulobacterales/Caulobacteraceae/Asticcacaulis	0	0	0	0	0	0	0	0	0	0	0	0	0	0	0	0	0	0	0	0	0	0	0	0	0	0	0	0	0	0	0	0	0	0	0	0	0	0	0	0	0	0	0	0	0
Bacteria/Proteobacteria/Alphaproteobacteria/Caulobacterales/Caulobacteraceae/Brevundimonas	0	0	0	0	0	0	0	0	0	0	0	0	0	0	0	0	0	0	0	0	0	0	0	0	0	0	0	0	0	0	0	0	0	0	0	0	0	0	0	0	0	0	0	0	0
Bacteria/Proteobacteria/Alphaproteobacteria/Caulobacterales/Caulobacteraceae/Caulobacter	0	0	0	0	0	0	0	0	0	0	0	0	0	0	0	0	0	0	0	0	0	0	0	0	0	0	0	0	0	0	0	0	0	0	0	0	0	0	0	0	0	0	0	0	0
Bacteria/Proteobacteria/Alphaproteobacteria/Caulobacterales/Caulobacteraceae/Phenylobacterium	0	0	0	0	0	0	0	0	0	0	0	0	0	0	0	0	0	0	0	0	0	0	0	0	0	0	0	0	0	0	0	0	0	0	0	0	0	0	0	0	0	0	0	0	0
Bacteria/Proteobacteria/Alphaproteobacteria/Caulobacterales/Caulobacteraceae/PMMR1	0	0	0	0	0	0	0	0	0	0	0	0	0	0	0	0	0	0	0	0	0	0	0	0	0	0	0	0	0	0	0	0	0	0	0	0	0	0	0	0	0	0	0	0	0
Bacteria/Proteobacteria/Alphaproteobacteria/Caulobacterales/Caulobacteraceae/uncultured	0	0	0	0	0	0	0	0	0	0	0	0	0	0	0	0	0	0	0	0	0	0	0	0	0	0	0	0	0	0	0	0	0	0	0	0	0	0	0	0	0	0	0	0	0
Bacteria/Proteobacteria/Alphaproteobacteria/Caulobacterales/Hyphomonadaceae/Euryhalocaulis	0	0	0	0	0	0	0	0	0	0	0	0	0	0	0	0	0	0	0	0	0	0	0	0	0	0	0	0	0	0	0	0	0	0	0	0	0	0	0	0	0	0	0	0	0
Bacteria/Proteobacteria/Alphaproteobacteria/Caulobacterales/Hyphomonadaceae/Henriciella	0	0	0	0	0	0	0	0	0	0	0	0	0	0	0	0	0	0	0	0	0	0	0	0	0	0	0	0	0	0	0	0	0	0	0	0	0	0	0	0	0	0	0	0	0
Bacteria/Proteobacteria/Alphaproteobacteria/Caulobacterales/Hyphomonadaceae/Hirschia	0	0	0	0	0	0	0	0	0	0	0	0	0	0	0	0	0	0	0	0	0	0	0	0	0	0	0	0	0	0	0	0	0	0	0	0	0	0	0	0	0	0	0	0	0
Bacteria/Proteobacteria/Alphaproteobacteria/Caulobacterales/Hyphomonadaceae/Hyphobacterium	0	0	0	0	0	0	0	0	0	0	0	0	0	0	0	0	0	0	0	0	0	0	0	0	0	0	0	0	0	0	0	0	0	0	0	0	0	0	0	0	0	0	0	0	0
Bacteria/Proteobacteria/Alphaproteobacteria/Caulobacterales/Hyphomonadaceae/Hyphomonas	29	0	0	0	0	0	0	0	0	44	0	0	0	0	0	0	0	0	0	0	0	0	0	0	0	0	0	0	0	0	0	0	0	0	0	0	0	0	0	0	0	0	0	0	0
Bacteria/Proteobacteria/Alphaproteobacteria/Caulobacterales/Hyphomonadaceae/Litorimonas	0	0	0	0	0	0	0	0	0	0	0	0	0	0	0	0	0	0	0	0	0	0	0	0	0	0	0	0	0	0	0	0	0	0	0	0	0	0	0	0	0	0	0	0	0
Bacteria/Proteobacteria/Alphaproteobacteria/Caulobacterales/Hyphomonadaceae/Maricaulis	0	0	0	0	0	0	0	0	0	0	0	0	0	0	0	0	0	0	0	0	0	0	0	0	0	0	0	0	0	0	0	0	0	0	0	0	0	0	0	0	0	0	0	0	0
Bacteria/Proteobacteria/Alphaproteobacteria/Caulobacterales/Hyphomonadaceae/Oceanicaulis	0	0	0	0	0	0	0	0	0	0	0	0	0	0	0	0	0	0	0	0	0	0	0	0	0	0	0	0	0	0	0	0	0	0	0	0	0	0	0	0	0	0	0	0	0
Bacteria/Proteobacteria/Alphaproteobacteria/Caulobacterales/Hyphomonadaceae/Ponticaulis	0	0	0	0	0	0	0	0	0	0	0	0	0	0	0	0	0	0	0	0	0	0	0	0	0	0	0	0	0	0	0	0	0	0	0	0	0	0	0	0	0	0	0	0	0
Bacteria/Proteobacteria/Alphaproteobacteria/Caulobacterales/Hyphomonadaceae/Robiginitomaculum	0	0	0	0	0	0	0	0	0	0	0	0	0	0	0	0	0	0	0	0	0	0	0	0	0	0	0	0	0	0	0	0	0	0	0	0	0	0	0	0	0	0	0	0	0
Bacteria/Proteobacteria/Alphaproteobacteria/Caulobacterales/Hyphomonadaceae/SWB02	0	0	0	0	0	0	0	0	0	0	0	0	0	0	0	0	0	0	0	0	0	0	0	0	0	0	0	0	0	0	0	0	0	0	0	0	0	0	0	0	0	0	0	0	0
Bacteria/Proteobacteria/Alphaproteobacteria/Caulobacterales/Hyphomonadaceae/UKL13-1	0	0	0	0	0	0	0	0	0	0	0	0	0	0	0	0	0	0	0	0	0	0	0	0	0	0	0	0	0	0	0	0	0	0	0	0	0	0	0	0	0	0	0	0	0
Bacteria/Proteobacteria/Alphaproteobacteria/Caulobacterales/Hyphomonadaceae/uncultured	0	0	0	0	0	0	0	0	0	0	0	0	0	0	0	0	0	0	0	0	0	0	0	0	0	0	0	0	0	0	0	0	0	0	0	0	0	0	0	0	0	0	0	0	0
Bacteria/Proteobacteria/Alphaproteobacteria/Caulobacterales/Hyphomonadaceae/Woodsholea	0	0	0	0	0	0	0	0	0	0	0	0	0	0	0	0	0	0	0	0	0	0	0	0	0	0	0	0	0	0	0	0	0	0	0	0	0	0	0	0	0	0	0	0	0
Bacteria/Proteobacteria/Alphaproteobacteria/Caulobacterales/Parvularculaceae/Amphiplicatus	0	0	0	0	0	0	0	0	0	0	0	0	0	0	0	0	0	0	0	0	0	0	0	0	0	0	0	0	0	0	0	0	0	0	0	0	0	0	0	0	0	0	0	0	0
Bacteria/Proteobacteria/Alphaproteobacteria/Caulobacterales/Parvularculaceae/Parvularcula	0	0	0	0	0	0	0	0	0	0	0	0	0	0	0	0	0	0	0	0	0	0	0	0	0	0	0	0	0	0	0	0	0	0	0	0	0	0	0	0	0	0	0	0	0
Bacteria/Proteobacteria/Alphaproteobacteria/Caulobacterales/Parvularculaceae/uncultured	0	0	0	0	0	0	0	0	0	0	0	0	0	0	0	0	0	0	0	0	0	0	0	0	0	0	0	0	0	0	0	0	0	0	0	0	0	0	0	0	0	0	0	0	0
Bacteria/Proteobacteria/Alphaproteobacteria/Dongiales/Dongiaceae/Dongia	0	0	0	0	0	0	0	0	0	0	0	0	0	0	0	0	0	0	0	0	0	0	0	0	0	0	0	0	0	0	0	0	0	0	0	0	0	0	0	0	0	0	0	0	0
Bacteria/Proteobacteria/Alphaproteobacteria/Elsterales/Elsteraceae/Elstera	0	0	0	0	0	0	0	0	0	0	0	0	0	0	0	0	0	0	0	0	0	0	0	0	0	0	0	0	0	0	0	0	0	0	0	0	0	0	0	0	0	0	0	0	0
Bacteria/Proteobacteria/Alphaproteobacteria/Elsterales/Elsteraceae/Lacibacterium	0	0	0	0	0	0	0	0	0	0	0	0	0	0	0	0	0	0	0	0	0	0	0	0	0	0	0	0	0	0	0	0	0	0	0	0	0	0	0	0	0	0	0	0	0
Bacteria/Proteobacteria/Alphaproteobacteria/Elsterales/Elsteraceae/uncultured	0	0	0	0	0	0	0	0	0	0	0	0	0	0	0	0	0	0	0	0	0	0	0	0	0	0	0	0	0	0	0	0	0	0	0	0	0	0	0	0	0	0	0	0	0
Bacteria/Proteobacteria/Alphaproteobacteria/Holosporales/Holosporaceae/Candidatus Bealeia	0	0	0	0	0	0	0	0	0	0	0	0	0	0	0	0	0	0	0	0	0	0	0	0	0	0	0	0	0	0	0	0	0	0	0	0	0	0	0	0	0	0	0	0	0
Bacteria/Proteobacteria/Alphaproteobacteria/Holosporales/Holosporaceae/Candidatus Gortzia	0	0	0	0	0	0	0	0	0	0	0	0	0	0	0	0	0	0	0	0	0	0	0	0	0	0	0	0	0	0	0	0	0	0	0	0	0	0	0	0	0	0	0	0	0
Bacteria/Proteobacteria/Alphaproteobacteria/Holosporales/Holosporaceae/Candidatus Paraholospora	0	0	0	0	0	0	0	0	0	0	0	0	0	0	0	0	0	0	0	0	0	0	0	0	0	0	0	0	0	0	0	0	0	0	0	0	0	0	0	0	0	0	0	0	0
Bacteria/Proteobacteria/Alphaproteobacteria/Holosporales/Holosporaceae/Holospora	0	0	0	0	0	0	0	0	0	0	0	0	0	0	0	0	0	0	0	0	0	0	0	0	0	0	0	0	0	0	0	0	0	0	0	0	0	0	0	0	0	0	0	0	0
Bacteria/Proteobacteria/Alphaproteobacteria/Holosporales/Holosporaceae/uncultured	0	0	0	0	0	0	0	0	0	0	0	0	0	0	0	0	0	0	0	0	0	0	0	0	0	0	0	0	0	0	0	0	0	0	0	0	0	0	0	0	0	0	0	0	0
Bacteria/Proteobacteria/Alphaproteobacteria/Kordiimonadales/Kordiimonadaceae/Kordiimonas	0	0	0	0	0	0	0	0	0	0	0	0	0	0	0	0	0	0	0	0	0	0	0	0	0	0	0	0	0	0	0	0	0	0	0	0	0	0	0	0	0	0	0	0	0
Bacteria/Proteobacteria/Alphaproteobacteria/Kordiimonadales/Kordiimonadales Incertae Sedis/Eilatimonas	0	0	0	0	0	0	0	0	0	0	0	0	0	0	0	0	0	0	0	0	0	0	0	0	0	0	0	0	0	0	0	0	0	0	0	0	0	0	0	0	0	0	0	0	0
Bacteria/Proteobacteria/Alphaproteobacteria/Kordiimonadales/Temperatibacteraceae/Temperatibacter	0	0	0	0	0	0	0	0	0	0	0	0	0	0	0	0	0	0	0	0	0	0	0	0	0	0	0	0	0	0	0	0	0	0	0	0	0	0	0	0	0	0	0	0	0
Bacteria/Proteobacteria/Alphaproteobacteria/Micavibrionales/Micavibrionaceae/Micavibrio	0	0	0	0	0	0	0	0	0	0	0	0	0	0	0	0	0	0	0	0	0	0	0	0	0	0	0	0	0	0	0	0	0	0	0	0	0	0	0	0	0	0	0	0	0
Bacteria/Proteobacteria/Alphaproteobacteria/Micavibrionales/Micavibrionaceae/uncultured	0	0	0	0	0	0	0	0	0	0	0	0	0	0	0	0	0	0	0	0	0	0	0	0	0	0	0	0	0	0	0	0	0	0	0	0	0	0	0	0	0	0	0	0	0
Bacteria/Proteobacteria/Alphaproteobacteria/Micropepsales/Micropepsaceae/Rhizomicrobium	0	0	0	0	0	0	0	0	0	0	0	0	0	0	0	0	0	0	0	0	0	0	0	0	0	0	0	0	0	0	0	0	0	0	0	0	0	0	0	0	0	0	0	0	0
Bacteria/Proteobacteria/Alphaproteobacteria/Micropepsales/Micropepsaceae/uncultured	0	0	0	0	0	0	0	0	0	0	0	0	0	0	0	0	0	0	0	0	0	0	0	0	0	0	0	0	0	0	0	0	0	0	0	0	0	0	0	0	0	0	0	0	0
Bacteria/Proteobacteria/Alphaproteobacteria/Paracaedibacterales/Paracaedibacteraceae/Candidatus Captivus	0	0	0	0	0	0	0	0	0	0	0	0	0	0	0	0	0	0	0	0	0	0	0	0	0	0	0	0	0	0	0	0	0	0	0	0	0	0	0	0	0	0	0	0	0
Bacteria/Proteobacteria/Alphaproteobacteria/Paracaedibacterales/Paracaedibacteraceae/Candidatus Finniella	0	0	0	0	0	0	0	0	0	0	0	0	0	0	0	0	0	0	0	0	0	0	0	0	0	0	0	0	0	0	0	0	0	0	0	0	0	0	0	0	0	0	0	0	0
Bacteria/Proteobacteria/Alphaproteobacteria/Paracaedibacterales/Paracaedibacteraceae/Candidatus Paracaedibacter	0	0	0	0	0	0	0	0	0	0	0	0	0	0	0	0	0	0	0	0	0	0	0	0	0	0	0	0	0	0	0	0	0	0	0	0	0	0	0	0	0	0	0	0	0
Bacteria/Proteobacteria/Alphaproteobacteria/Paracaedibacterales/Paracaedibacteraceae/uncultured	0	0	0	0	0	0	0	0	0	0	0	0	0	0	0	0	0	0	0	0	0	0	0	0	0	0	0	0	0	0	0	0	0	0	0	0	0	0	0	0	0	0	0	0	0
Bacteria/Proteobacteria/Alphaproteobacteria/Parvibaculales/Parvibaculaceae/Mf105b01	0	0	0	0	0	0	0	0	0	0	0	0	0	0	0	0	0	0	0	0	0	0	0	0	0	0	0	0	0	0	0	0	0	0	0	0	0	0	0	0	0	0	0	0	0
Bacteria/Proteobacteria/Alphaproteobacteria/Parvibaculales/Parvibaculaceae/Parvibaculum	0	0	0	0	0	0	0	0	0	0	0	0	0	0	0	0	0	0	0	0	0	0	0	0	0	0	0	0	0	0	0	0	0	0	0	0	0	0	0	0	0	0	0	0	0
Bacteria/Proteobacteria/Alphaproteobacteria/Parvibaculales/Parvibaculaceae/Tepidicaulis	0	0	0	0	0	0	0	0	0	0	0	0	0	0	0	0	0	0	0	0	0	0	0	0	0	0	0	0	0	0	0	0	0	0	0	0	0	0	0	0	0	0	0	0	0
Bacteria/Proteobacteria/Alphaproteobacteria/Parvibaculales/Parvibaculaceae/uncultured	0	0	0	0	0	0	0	0	0	0	0	0	0	0	0	0	0	0	0	0	0	0	0	0	0	0	0	0	0	0	0	0	0	0	0	0	0	0	0	0	0	0	0	0	0
Bacteria/Proteobacteria/Alphaproteobacteria/Puniceispirillales/Puniceispirillales Incertae Sedis/Constrictibacter	0	0	0	0	0	0	0	0	0	0	0	0	0	0	0	0	0	0	0	0	0	0	0	0	0	0	0	0	0	0	0	0	0	0	0	0	0	0	0	0	0	0	0	0	0
Bacteria/Proteobacteria/Alphaproteobacteria/Reyranellales/Reyranellaceae/Reyranella	0	0	0	0	0	0	0	0	0	0	0	0	0	0	0	0	0	0	0	0	0	0	0	0	0	0	0	0	0	0	0	0	0	0	0	0	0	0	0	0	0	0	0	0	0
Bacteria/Proteobacteria/Alphaproteobacteria/Reyranellales/Reyranellaceae/uncultured	0	0	0	0	0	0	0	0	0	0	0	0	0	0	0	0	0	0	0	0	0	0	0	0	0	0	0	0	0	0	0	0	0	0	0	0	0	0	0	0	0	0	0	0	0
Bacteria/Proteobacteria/Alphaproteobacteria/Rhizobiales/Beijerinckiaceae/1174-901-12	0	0	0	0	0	0	0	0	0	0	0	0	0	0	0	0	0	0	0	0	0	0	0	0	0	0	0	0	0	0	0	0	0	0	0	0	0	0	0	0	0	0	0	0	0
Bacteria/Proteobacteria/Alphaproteobacteria/Rhizobiales/Beijerinckiaceae/alphaI cluster	0	0	0	0	0	0	0	0	0	0	0	0	0	0	0	0	0	0	0	0	0	0	0	0	0	0	0	0	0	0	0	0	0	0	0	0	0	0	0	0	0	0	0	0	0
Bacteria/Proteobacteria/Alphaproteobacteria/Rhizobiales/Beijerinckiaceae/Bosea	0	0	0	0	0	0	0	0	0	0	0	0	0	0	0	0	0	0	0	0	0	0	0	0	0	0	0	0	0	0	0	0	0	0	0	0	0	0	0	0	0	0	0	0	0
Bacteria/Proteobacteria/Alphaproteobacteria/Rhizobiales/Beijerinckiaceae/Methylobacterium	0	0	0	0	0	0	0	0	0	0	0	0	0	0	0	0	0	0	0	0	0	0	0	0	0	0	0	0	0	0	0	0	0	0	0	0	0	0	0	0	0	0	0	0	0
Bacteria/Proteobacteria/Alphaproteobacteria/Rhizobiales/Beijerinckiaceae/Methylocystis	0	0	0	0	0	0	0	0	0	0	0	0	0	0	0	0	0	0	0	0	0	0	0	0	0	0	0	0	0	0	0	0	0	0	0	0	0	0	0	0	0	0	0	0	0
Bacteria/Proteobacteria/Alphaproteobacteria/Rhizobiales/Beijerinckiaceae/Methylorosula	0	0	0	0	0	0	0	0	0	0	0	0	0	0	0	0	0	0	0	0	0	0	0	0	0	0	0	0	0	0	0	0	0	0	0	0	0	0	0	0	0	0	0	0	0
Bacteria/Proteobacteria/Alphaproteobacteria/Rhizobiales/Beijerinckiaceae/Methylovirgula	0	0	0	0	0	0	0	0	0	0	0	0	0	0	0	0	0	0	0	0	0	0	0	0	0	0	0	0	0	0	0	0	0	0	0	0	0	0	0	0	0	0	0	0	0
Bacteria/Proteobacteria/Alphaproteobacteria/Rhizobiales/Beijerinckiaceae/Microvirga	0	0	0	0	0	0	0	0	0	0	0	0	0	0	0	0	0	0	0	0	0	0	0	0	0	0	0	0	0	0	0	0	0	0	0	0	0	0	0	0	0	0	0	0	0
Bacteria/Proteobacteria/Alphaproteobacteria/Rhizobiales/Beijerinckiaceae/Pseudochelatococcus	0	0	0	0	0	0	0	0	0	0	0	0	0	0	0	0	0	0	0	0	0	0	0	0	0	0	0	0	0	0	0	0	0	0	0	0	0	0	0	0	0	0	0	0	0
Bacteria/Proteobacteria/Alphaproteobacteria/Rhizobiales/Beijerinckiaceae/Psychroglaciecola	0	0	0	0	0	0	0	0	0	0	0	0	0	0	0	0	0	0	0	0	0	0	0	0	0	0	0	0	0	0	0	0	0	0	0	0	0	0	0	0	0	0	0	0	0
Bacteria/Proteobacteria/Alphaproteobacteria/Rhizobiales/Beijerinckiaceae/Rhodoblastus	0	0	0	0	0	0	0	0	0	0	0	0	0	0	0	0	0	0	0	0	0	0	0	0	0	0	0	0	0	0	0	0	0	0	0	0	0	0	0	0	0	0	0	0	0
Bacteria/Proteobacteria/Alphaproteobacteria/Rhizobiales/Beijerinckiaceae/Roseiarcus	0	0	0	0	0	0	0	0	0	0	0	0	0	0	0	0	0	0	0	0	0	0	0	0	0	0	0	0	0	0	0	0	0	0	0	0	0	0	0	0	0	0	0	0	0
Bacteria/Proteobacteria/Alphaproteobacteria/Rhizobiales/Beijerinckiaceae/Salinarimonas	0	0	0	0	0	0	0	0	0	0	0	0	0	0	0	0	0	0	0	0	0	0	0	0	0	0	0	0	0	0	0	0	0	0	0	0	0	0	0	0	0	0	0	0	0
Bacteria/Proteobacteria/Alphaproteobacteria/Rhizobiales/Beijerinckiaceae/uncultured	0	0	0	0	0	0	0	0	0	0	0	0	0	0	0	0	0	0	0	0	0	0	0	0	0	0	0	0	0	0	0	0	0	0	0	0	0	0	0	0	0	0	0	0	0
Bacteria/Proteobacteria/Alphaproteobacteria/Rhizobiales/Devosiaceae/Arsenicitalea	0	0	0	0	0	0	0	0	0	0	0	0	0	0	0	0	0	0	0	0	0	0	0	0	0	0	0	0	0	0	0	0	0	0	0	0	0	0	0	0	0	0	0	0	0
Bacteria/Proteobacteria/Alphaproteobacteria/Rhizobiales/Devosiaceae/Cucumibacter	0	0	0	0	0	0	0	0	0	0	0	0	0	0	0	0	0	0	0	0	0	0	0	0	0	0	0	0	0	0	0	0	0	0	0	0	0	0	0	0	0	0	0	0	0
Bacteria/Proteobacteria/Alphaproteobacteria/Rhizobiales/Devosiaceae/Devosia	0	0	0	0	0	0	0	0	0	0	0	0	0	0	0	0	0	0	0	0	0	0	0	0	0	0	0	0	0	0	0	0	0	0	0	0	0	0	0	0	0	0	0	0	0
Bacteria/Proteobacteria/Alphaproteobacteria/Rhizobiales/Devosiaceae/Maritalea	0	0	0	0	0	0	0	0	0	0	0	0	0	0	0	0	0	0	0	0	0	0	0	0	0	0	0	0	0	0	0	0	0	0	0	0	0	0	0	0	0	0	0	0	0
Bacteria/Proteobacteria/Alphaproteobacteria/Rhizobiales/Devosiaceae/Pelagibacterium	0	0	0	0	0	0	0	0	0	0	0	0	0	0	0	0	0	0	0	0	0	0	0	0	0	0	0	0	0	0	0	0	0	0	0	0	0	0	0	0	0	0	0	0	0
Bacteria/Proteobacteria/Alphaproteobacteria/Rhizobiales/Devosiaceae/uncultured	0	0	0	0	0	0	0	0	0	0	0	0	0	0	0	0	0	0	0	0	0	0	0	0	0	0	0	0	0	0	0	0	0	0	0	0	0	0	0	0	0	0	0	0	0
Bacteria/Proteobacteria/Alphaproteobacteria/Rhizobiales/Hyphomicrobiaceae/Filomicrobium	0	0	0	0	0	0	0	0	0	0	0	0	0	0	0	0	0	0	0	0	0	0	0	0	0	0	0	0	0	0	0	0	0	0	0	0	0	0	0	0	0	0	0	0	0
Bacteria/Proteobacteria/Alphaproteobacteria/Rhizobiales/Hyphomicrobiaceae/Hyphomicrobium	0	0	0	0	0	0	0	0	0	0	0	0	0	0	0	0	0	0	0	0	0	0	0	0	0	0	0	0	0	0	0	0	0	0	0	0	0	0	0	0	0	0	0	0	0
Bacteria/Proteobacteria/Alphaproteobacteria/Rhizobiales/Hyphomicrobiaceae/Pedomicrobium	0	0	0	0	0	0	0	0	0	0	0	0	0	0	0	0	0	0	0	0	0	0	0	0	0	0	0	0	0	0	0	0	0	0	0	0	0	0	0	0	0	0	0	0	0
Bacteria/Proteobacteria/Alphaproteobacteria/Rhizobiales/Hyphomicrobiaceae/uncultured	0	0	0	0	0	0	0	0	0	0	0	0	0	0	0	0	0	0	0	0	0	0	0	0	0	0	0	0	0	0	0	0	0	0	0	0	0	0	0	0	0	0	0	0	0
Bacteria/Proteobacteria/Alphaproteobacteria/Rhizobiales/Kaistiaceae/Kaistia	0	0	0	0	0	0	0	0	0	0	0	0	0	0	0	0	0	0	0	0	0	0	0	0	0	0	0	0	0	0	0	0	0	0	0	0	0	0	0	0	0	0	0	0	0
Bacteria/Proteobacteria/Alphaproteobacteria/Rhizobiales/Labraceae/Labrys	0	0	0	0	0	0	0	0	0	0	0	0	0	0	0	0	0	0	0	0	0	0	0	0	0	0	0	0	0	0	0	0	0	0	0	0	0	0	0	0	0	0	0	0	0
Bacteria/Proteobacteria/Alphaproteobacteria/Rhizobiales/Methyloligellaceae/Methyloceanibacter	0	0	0	0	0	0	0	0	0	0	0	0	0	0	0	0	0	0	0	0	0	0	0	0	0	0	0	0	0	0	0	0	0	0	0	0	0	0	0	0	0	0	0	0	0
Bacteria/Proteobacteria/Alphaproteobacteria/Rhizobiales/Methyloligellaceae/uncultured	0	0	0	0	0	0	0	0	0	0	0	0	0	0	0	0	0	0	0	0	0	0	0	0	0	0	0	0	0	0	0	0	0	0	0	0	0	0	0	0	0	0	0	0	0
Bacteria/Proteobacteria/Alphaproteobacteria/Rhizobiales/Pleomorphomonadaceae/Ancalomicrobium	0	0	0	0	0	0	0	0	0	0	0	0	0	0	0	0	0	0	0	0	0	0	0	0	0	0	0	0	0	0	0	0	0	0	0	0	0	0	0	0	0	0	0	0	0
Bacteria/Proteobacteria/Alphaproteobacteria/Rhizobiales/Pleomorphomonadaceae/Chthonobacter	0	0	0	0	0	0	0	0	0	0	0	0	0	0	0	0	0	0	0	0	0	0	0	0	0	0	0	0	0	0	0	0	0	0	0	0	0	0	0	0	0	0	0	0	0
Bacteria/Proteobacteria/Alphaproteobacteria/Rhizobiales/Pleomorphomonadaceae/Pleomorphomonas	0	0	0	0	0	0	0	0	0	0	0	0	0	0	0	0	0	0	0	0	0	0	0	0	0	0	0	0	0	0	0	0	0	0	0	0	0	0	0	0	0	0	0	0	0
Bacteria/Proteobacteria/Alphaproteobacteria/Rhizobiales/Pleomorphomonadaceae/uncultured	0	0	0	0	0	0	0	0	0	0	0	0	0	0	0	0	0	0	0	0	0	0	0	0	0	0	0	0	0	0	0	0	0	0	0	0	0	0	0	0	0	0	0	0	0
Bacteria/Proteobacteria/Alphaproteobacteria/Rhizobiales/Rhizobiaceae/Ahrensia	0	0	0	0	0	0	0	0	0	0	0	0	0	0	0	0	0	0	0	0	0	0	0	0	0	0	0	0	0	0	0	0	0	0	0	0	0	0	0	0	0	0	0	0	0
Bacteria/Proteobacteria/Alphaproteobacteria/Rhizobiales/Rhizobiaceae/Aliihoeflea	0	0	0	0	0	0	0	0	0	0	0	0	0	0	0	0	0	0	0	0	0	0	0	0	0	0	0	0	0	0	0	0	0	0	0	0	0	0	0	0	0	0	0	0	0
Bacteria/Proteobacteria/Alphaproteobacteria/Rhizobiales/Rhizobiaceae/Allorhizobium-Neorhizobium-Pararhizobium-Rhizobium	0	0	0	0	0	0	0	0	0	0	0	0	0	0	0	0	0	0	0	0	0	0	0	0	0	0	0	0	0	0	0	0	0	0	0	0	0	0	0	0	0	0	0	0	0
Bacteria/Proteobacteria/Alphaproteobacteria/Rhizobiales/Rhizobiaceae/Aminobacter	0	0	0	0	0	0	0	0	0	0	0	0	0	0	0	0	0	0	0	0	0	0	0	0	0	0	0	0	0	0	0	0	0	0	0	0	0	0	0	0	0	0	0	0	0
Bacteria/Proteobacteria/Alphaproteobacteria/Rhizobiales/Rhizobiaceae/Aurantimonas	0	0	0	0	0	0	0	0	0	0	0	0	0	0	0	0	0	0	0	0	0	0	0	0	0	0	0	0	0	0	0	0	0	0	0	0	0	0	0	0	0	0	0	0	0
Bacteria/Proteobacteria/Alphaproteobacteria/Rhizobiales/Rhizobiaceae/Aureimonas	0	0	0	0	0	0	0	0	0	0	0	0	0	0	0	0	0	0	0	0	0	0	0	0	0	0	0	0	0	0	0	0	0	0	0	0	0	0	0	0	0	0	0	0	0
Bacteria/Proteobacteria/Alphaproteobacteria/Rhizobiales/Rhizobiaceae/Bartonella	0	0	0	0	0	0	0	0	0	0	0	0	0	0	0	0	0	0	0	0	0	0	0	0	0	0	0	0	0	0	0	0	0	0	0	0	0	0	0	0	0	0	0	0	0
Bacteria/Proteobacteria/Alphaproteobacteria/Rhizobiales/Rhizobiaceae/Brucella	0	0	0	0	0	0	0	0	0	0	0	0	0	0	0	0	0	0	0	0	0	0	0	0	0	0	0	0	0	0	0	0	0	0	0	0	0	0	0	0	0	0	0	0	0
Bacteria/Proteobacteria/Alphaproteobacteria/Rhizobiales/Rhizobiaceae/Candidatus Hodgkinia	0	0	0	0	0	0	0	0	0	0	0	0	0	0	0	0	0	0	0	0	0	0	0	0	0	0	0	0	0	0	0	0	0	0	0	0	0	0	0	0	0	0	0	0	0
Bacteria/Proteobacteria/Alphaproteobacteria/Rhizobiales/Rhizobiaceae/Candidatus Liberibacter	0	0	0	0	0	0	0	0	0	0	0	0	0	0	0	0	0	0	0	0	0	0	0	0	0	0	0	0	0	0	0	0	0	0	0	0	0	0	0	0	0	0	0	0	0
Bacteria/Proteobacteria/Alphaproteobacteria/Rhizobiales/Rhizobiaceae/Chelativorans	0	0	0	0	0	0	0	0	0	0	0	0	0	0	0	0	0	0	0	0	0	0	0	0	0	0	0	0	0	0	0	0	0	0	0	0	0	0	0	0	0	0	0	0	0
Bacteria/Proteobacteria/Alphaproteobacteria/Rhizobiales/Rhizobiaceae/Cohaesibacter	0	0	0	0	0	0	0	0	0	0	0	0	0	0	0	0	0	0	0	0	0	0	0	0	0	0	0	0	0	0	0	0	0	0	0	0	0	0	0	0	0	0	0	0	0
Bacteria/Proteobacteria/Alphaproteobacteria/Rhizobiales/Rhizobiaceae/Ensifer	0	0	0	0	0	0	0	0	0	0	0	0	0	0	0	0	0	0	0	0	0	0	0	0	0	0	0	0	0	0	0	0	0	0	0	0	0	0	0	0	0	0	0	0	0
Bacteria/Proteobacteria/Alphaproteobacteria/Rhizobiales/Rhizobiaceae/Hoeflea	0	0	0	0	0	0	0	0	0	0	0	0	0	0	0	0	0	0	0	0	0	0	0	0	0	0	0	0	0	0	0	0	0	0	0	0	0	0	0	0	0	0	0	0	0
Bacteria/Proteobacteria/Alphaproteobacteria/Rhizobiales/Rhizobiaceae/Mesorhizobium	0	0	0	0	0	0	0	0	0	0	0	0	0	0	0	0	0	0	0	0	0	0	0	0	0	0	0	0	0	0	0	0	0	0	0	0	0	0	0	0	0	0	0	0	0
Bacteria/Proteobacteria/Alphaproteobacteria/Rhizobiales/Rhizobiaceae/Nitratireductor	0	0	0	0	0	0	0	0	0	0	0	0	0	0	0	0	0	0	0	0	0	0	0	0	0	0	0	0	0	0	0	0	0	0	0	0	0	0	0	0	0	0	0	0	0
Bacteria/Proteobacteria/Alphaproteobacteria/Rhizobiales/Rhizobiaceae/Ochrobactrum	0	0	0	0	0	0	0	0	0	0	0	0	0	0	0	0	0	0	0	0	0	0	0	0	0	0	0	0	0	0	0	0	0	0	0	0	0	0	0	0	0	0	0	0	0
Bacteria/Proteobacteria/Alphaproteobacteria/Rhizobiales/Rhizobiaceae/Oricola	0	0	0	0	0	0	0	0	0	0	0	0	0	0	0	0	0	0	0	0	0	0	0	0	0	0	0	0	0	0	0	0	0	0	0	0	0	0	0	0	0	0	0	0	0
Bacteria/Proteobacteria/Alphaproteobacteria/Rhizobiales/Rhizobiaceae/Paenochrobactrum	0	0	0	0	0	0	0	0	0	0	0	0	0	0	0	0	0	0	0	0	0	0	0	0	0	0	0	0	0	0	0	0	0	0	0	0	0	0	0	0	0	0	0	0	0
Bacteria/Proteobacteria/Alphaproteobacteria/Rhizobiales/Rhizobiaceae/Phyllobacterium	0	0	0	0	0	0	0	0	0	0	0	0	0	0	0	0	0	0	0	0	0	0	0	0	0	0	0	0	0	0	0	0	0	0	0	0	0	0	0	0	0	0	0	0	0
Bacteria/Proteobacteria/Alphaproteobacteria/Rhizobiales/Rhizobiaceae/Pseudahrensia	0	0	0	0	0	0	0	0	0	0	0	0	0	0	0	0	0	0	0	0	0	0	0	0	0	0	0	0	0	0	0	0	0	0	0	0	0	0	0	0	0	0	0	0	0
Bacteria/Proteobacteria/Alphaproteobacteria/Rhizobiales/Rhizobiaceae/Pseudaminobacter	0	0	0	0	0	0	0	0	0	0	0	0	0	0	0	0	0	0	0	0	0	0	0	0	0	0	0	0	0	0	0	0	0	0	0	0	0	0	0	0	0	0	0	0	0
Bacteria/Proteobacteria/Alphaproteobacteria/Rhizobiales/Rhizobiaceae/Pseudochrobactrum	0	0	0	0	0	0	0	0	0	0	0	0	0	0	0	0	0	0	0	0	0	0	0	0	0	0	0	0	0	0	0	0	0	0	0	0	0	0	0	0	0	0	0	0	0
Bacteria/Proteobacteria/Alphaproteobacteria/Rhizobiales/Rhizobiaceae/Pseudohoeflea	0	0	0	0	0	0	0	0	0	0	0	0	0	0	0	0	0	0	0	0	0	0	0	0	0	0	0	0	0	0	0	0	0	0	0	0	0	0	0	0	0	0	0	0	0
Bacteria/Proteobacteria/Alphaproteobacteria/Rhizobiales/Rhizobiaceae/Roseitalea	0	0	0	0	0	0	0	0	0	0	0	0	0	0	0	0	0	0	0	0	0	0	0	0	0	0	0	0	0	0	0	0	0	0	0	0	0	0	0	0	0	0	0	0	0
Bacteria/Proteobacteria/Alphaproteobacteria/Rhizobiales/Rhizobiaceae/Shinella	0	0	0	0	0	0	0	0	0	0	0	0	0	0	0	0	0	0	0	0	0	0	0	0	0	0	0	0	0	0	0	0	0	0	0	0	0	0	0	0	0	0	0	0	0
Bacteria/Proteobacteria/Alphaproteobacteria/Rhizobiales/Rhizobiaceae/uncultured	0	0	0	0	0	0	0	0	0	0	0	0	0	0	0	0	0	0	0	0	0	0	0	0	0	0	0	0	0	0	0	0	0	0	0	0	0	0	0	0	0	0	0	0	0
Bacteria/Proteobacteria/Alphaproteobacteria/Rhizobiales/Rhizobiales Incertae Sedis/Anderseniella	0	0	0	0	0	0	0	0	0	0	0	0	0	0	0	0	0	0	0	0	0	0	0	0	0	0	0	0	0	0	0	0	0	0	0	0	0	0	0	0	0	0	0	0	0
Bacteria/Proteobacteria/Alphaproteobacteria/Rhizobiales/Rhizobiales Incertae Sedis/Bauldia	0	0	0	0	0	0	0	0	0	0	0	0	0	0	0	0	0	0	0	0	0	0	0	0	0	0	0	0	0	0	0	0	0	0	0	0	0	0	0	0	0	0	0	0	0
Bacteria/Proteobacteria/Alphaproteobacteria/Rhizobiales/Rhizobiales Incertae Sedis/Dichotomicrobium	0	0	0	0	0	0	0	0	0	0	0	0	0	0	0	0	0	0	0	0	0	0	0	0	0	0	0	0	0	0	0	0	0	0	0	0	0	0	0	0	0	0	0	0	0
Bacteria/Proteobacteria/Alphaproteobacteria/Rhizobiales/Rhizobiales Incertae Sedis/Nordella	0	0	0	0	0	0	0	0	0	0	0	0	0	0	0	0	0	0	0	0	0	0	0	0	0	0	0	0	0	0	0	0	0	0	0	0	0	0	0	0	0	0	0	0	0
Bacteria/Proteobacteria/Alphaproteobacteria/Rhizobiales/Rhizobiales Incertae Sedis/Phreatobacter	0	0	0	0	0	0	0	0	0	0	0	0	0	0	0	0	0	0	0	0	0	0	0	0	0	0	0	0	0	0	0	0	0	0	0	0	0	0	0	0	0	0	0	0	0
Bacteria/Proteobacteria/Alphaproteobacteria/Rhizobiales/Rhizobiales Incertae Sedis/uncultured	0	0	0	0	0	0	0	0	0	0	0	0	0	0	0	0	0	0	0	0	0	0	0	0	0	0	0	0	0	0	0	0	0	0	0	0	0	0	0	0	0	0	0	0	0
Bacteria/Proteobacteria/Alphaproteobacteria/Rhizobiales/Rhodobiaceae/Afifella	0	0	0	0	0	0	0	0	0	0	0	0	0	0	0	0	0	0	0	0	0	0	0	0	0	0	0	0	0	0	0	0	0	0	0	0	0	0	0	0	0	0	0	0	0
Bacteria/Proteobacteria/Alphaproteobacteria/Rhizobiales/Rhodobiaceae/Amorphus	0	0	0	0	0	0	0	0	0	0	0	0	0	0	0	0	0	0	0	0	0	0	0	0	0	0	0	0	0	0	0	0	0	0	0	0	0	0	0	0	0	0	0	0	0
Bacteria/Proteobacteria/Alphaproteobacteria/Rhizobiales/Rhodobiaceae/Tepidamorphus	0	0	0	0	0	0	0	0	0	0	0	0	0	0	0	0	0	0	0	0	0	0	0	0	0	0	0	0	0	0	0	0	0	0	0	0	0	0	0	0	0	0	0	0	0
Bacteria/Proteobacteria/Alphaproteobacteria/Rhizobiales/Rhodomicrobiaceae/Rhodomicrobium	0	0	0	0	0	0	0	0	0	0	0	0	0	0	0	0	0	0	0	0	0	0	0	0	0	0	0	0	0	0	0	0	0	0	0	0	0	0	0	0	0	0	0	0	0
Bacteria/Proteobacteria/Alphaproteobacteria/Rhizobiales/Stappiaceae/Breoghania	0	0	0	0	0	0	0	0	0	0	0	0	0	0	0	0	0	0	0	0	0	0	0	0	0	0	0	0	0	0	0	0	0	0	0	0	0	0	0	0	0	0	0	0	0
Bacteria/Proteobacteria/Alphaproteobacteria/Rhizobiales/Stappiaceae/Labrenzia	0	0	0	0	0	0	0	0	0	0	0	0	0	0	0	0	0	0	0	0	0	0	0	0	0	0	0	0	0	0	0	0	0	0	0	0	0	0	0	0	0	0	0	0	0
Bacteria/Proteobacteria/Alphaproteobacteria/Rhizobiales/Stappiaceae/Pannonibacter	0	0	0	0	0	0	0	0	0	0	0	0	0	0	0	0	0	0	0	0	0	0	0	0	0	0	0	0	0	0	0	0	0	0	0	0	0	0	0	0	0	0	0	0	0
Bacteria/Proteobacteria/Alphaproteobacteria/Rhizobiales/Stappiaceae/Pseudovibrio	0	0	0	0	0	0	0	0	0	0	0	0	0	0	0	0	0	0	0	0	0	0	0	0	0	0	0	0	0	0	0	0	0	0	0	0	0	0	0	0	0	0	0	0	0
Bacteria/Proteobacteria/Alphaproteobacteria/Rhizobiales/Stappiaceae/Rhodothalassium	0	0	0	0	0	0	0	0	0	0	0	0	0	0	0	0	0	0	0	0	0	0	0	0	0	0	0	0	0	0	0	0	0	0	0	0	0	0	0	0	0	0	0	0	0
Bacteria/Proteobacteria/Alphaproteobacteria/Rhizobiales/Stappiaceae/uncultured	0	0	0	0	0	0	0	0	0	0	0	0	0	0	0	0	0	0	0	0	0	0	0	0	0	0	0	0	0	0	0	0	0	0	0	0	0	0	0	0	0	0	0	0	0
Bacteria/Proteobacteria/Alphaproteobacteria/Rhizobiales/Thermopetrobacteraceae/Thermopetrobacter	0	0	0	0	0	0	0	0	0	0	0	0	0	0	0	0	0	0	0	0	0	0	0	0	0	0	0	0	0	0	0	0	0	0	0	0	0	0	0	0	0	0	0	0	0
Bacteria/Proteobacteria/Alphaproteobacteria/Rhizobiales/Xanthobacteraceae/Afipia	0	0	0	0	0	0	0	0	0	0	0	0	0	0	0	0	0	0	0	0	0	0	0	0	0	0	0	0	0	0	0	0	0	0	0	0	0	0	0	0	0	0	0	0	0
Bacteria/Proteobacteria/Alphaproteobacteria/Rhizobiales/Xanthobacteraceae/Azorhizobium	0	0	0	0	0	0	0	0	0	0	0	0	0	0	0	0	0	0	0	0	0	0	0	0	0	0	0	0	0	0	0	0	0	0	0	0	0	0	0	0	0	0	0	0	0
Bacteria/Proteobacteria/Alphaproteobacteria/Rhizobiales/Xanthobacteraceae/Blastochloris	0	0	0	0	0	0	0	0	0	0	0	0	0	0	0	0	0	0	0	0	0	0	0	0	0	0	0	0	0	0	0	0	0	0	0	0	0	0	0	0	0	0	0	0	0
Bacteria/Proteobacteria/Alphaproteobacteria/Rhizobiales/Xanthobacteraceae/Bradyrhizobium	0	0	0	0	0	0	0	0	0	0	0	0	0	0	0	0	0	0	0	0	0	0	0	0	0	0	0	0	0	0	0	0	0	0	0	0	0	0	0	0	0	0	0	0	0
Bacteria/Proteobacteria/Alphaproteobacteria/Rhizobiales/Xanthobacteraceae/Nitrobacter	0	0	0	0	0	0	0	0	0	0	0	0	0	0	0	0	0	0	0	0	0	0	0	0	0	0	0	0	0	0	0	0	0	0	0	0	0	0	0	0	0	0	0	0	0
Bacteria/Proteobacteria/Alphaproteobacteria/Rhizobiales/Xanthobacteraceae/Pseudolabrys	0	0	0	0	0	0	0	0	0	0	0	0	0	0	0	0	0	0	0	0	0	0	0	0	0	0	0	0	0	0	0	0	0	0	0	0	0	0	0	0	0	0	0	0	0
Bacteria/Proteobacteria/Alphaproteobacteria/Rhizobiales/Xanthobacteraceae/Pseudorhodoplanes	0	0	0	0	0	0	0	0	0	0	0	0	0	0	0	0	0	0	0	0	0	0	0	0	0	0	0	0	0	0	0	0	0	0	0	0	0	0	0	0	0	0	0	0	0
Bacteria/Proteobacteria/Alphaproteobacteria/Rhizobiales/Xanthobacteraceae/Pseudoxanthobacter	0	0	0	0	0	0	0	0	0	0	0	0	0	0	0	0	0	0	0	0	0	0	0	0	0	0	0	0	0	0	0	0	0	0	0	0	0	0	0	0	0	0	0	0	0
Bacteria/Proteobacteria/Alphaproteobacteria/Rhizobiales/Xanthobacteraceae/Rhodoplanes	0	0	0	0	0	0	0	0	0	0	0	0	0	0	0	0	0	0	0	0	0	0	0	0	0	0	0	0	0	0	0	0	0	0	0	0	0	0	0	0	0	0	0	0	0
Bacteria/Proteobacteria/Alphaproteobacteria/Rhizobiales/Xanthobacteraceae/Rhodopseudomonas	0	0	0	0	0	0	0	0	0	0	0	0	0	0	0	0	0	0	0	0	0	0	0	0	0	0	0	0	0	0	0	0	0	0	0	0	0	0	0	0	0	0	0	0	0
Bacteria/Proteobacteria/Alphaproteobacteria/Rhizobiales/Xanthobacteraceae/uncultured	0	0	0	0	0	0	0	0	0	0	0	0	0	0	0	0	0	0	0	0	0	0	0	0	0	0	0	0	0	0	0	0	0	0	0	0	0	0	0	0	0	0	0	0	0
Bacteria/Proteobacteria/Alphaproteobacteria/Rhizobiales/Xanthobacteraceae/Xanthobacter	0	0	0	0	0	0	0	0	0	0	0	0	0	0	0	0	0	0	0	0	0	0	0	0	0	0	0	0	0	0	0	0	0	0	0	0	0	0	0	0	0	0	0	0	0
Bacteria/Proteobacteria/Alphaproteobacteria/Rhodobacterales/Rhodobacteraceae/Actibacterium	0	0	0	0	0	0	0	0	0	0	0	0	0	0	0	0	0	0	0	0	0	0	0	0	0	0	0	0	0	0	0	0	0	0	0	0	0	0	0	0	0	0	0	0	0
Bacteria/Proteobacteria/Alphaproteobacteria/Rhodobacterales/Rhodobacteraceae/Aestuariivita	0	0	0	0	0	0	0	0	0	0	0	0	0	0	0	0	0	0	0	0	0	0	0	0	0	0	0	0	0	0	0	0	0	0	0	0	0	0	0	0	0	0	0	0	0
Bacteria/Proteobacteria/Alphaproteobacteria/Rhodobacterales/Rhodobacteraceae/Albidovulum	0	0	0	0	0	0	0	0	0	0	0	0	0	0	0	0	0	0	0	0	0	0	0	0	0	0	0	0	0	0	0	0	0	0	0	0	0	0	0	0	0	0	0	0	0
Bacteria/Proteobacteria/Alphaproteobacteria/Rhodobacterales/Rhodobacteraceae/Albimonas	0	0	0	0	0	0	0	0	0	0	0	0	0	0	0	0	0	0	0	0	0	0	0	0	0	0	0	0	0	0	0	0	0	0	0	0	0	0	0	0	0	0	0	0	0
Bacteria/Proteobacteria/Alphaproteobacteria/Rhodobacterales/Rhodobacteraceae/Albirhodobacter	0	0	0	0	0	0	0	0	0	0	0	0	0	0	0	0	0	0	0	0	0	0	0	0	0	0	0	0	0	0	0	0	0	0	0	0	0	0	0	0	0	0	0	0	0
Bacteria/Proteobacteria/Alphaproteobacteria/Rhodobacterales/Rhodobacteraceae/Aliiroseovarius	0	0	0	0	0	0	0	0	0	0	0	0	0	0	0	0	0	0	0	0	0	0	0	0	0	0	0	0	0	0	0	0	0	0	0	0	0	0	0	0	0	0	0	0	0
Bacteria/Proteobacteria/Alphaproteobacteria/Rhodobacterales/Rhodobacteraceae/Amaricoccus	0	0	0	0	0	0	0	0	0	0	0	0	0	0	0	0	0	0	0	0	0	0	0	0	0	0	0	0	0	0	0	0	0	0	0	0	0	0	0	0	0	0	0	0	0
Bacteria/Proteobacteria/Alphaproteobacteria/Rhodobacterales/Rhodobacteraceae/Amylibacter	0	0	0	0	0	0	0	0	0	0	0	0	0	0	0	0	0	0	0	0	0	0	0	0	0	0	0	0	0	0	0	0	0	0	0	0	0	0	0	0	0	0	0	0	0
Bacteria/Proteobacteria/Alphaproteobacteria/Rhodobacterales/Rhodobacteraceae/Aquimixticola	0	0	0	0	0	0	0	0	0	0	0	0	0	0	0	0	0	0	0	0	0	0	0	0	0	0	0	0	0	0	0	0	0	0	0	0	0	0	0	0	0	0	0	0	0
Bacteria/Proteobacteria/Alphaproteobacteria/Rhodobacterales/Rhodobacteraceae/Ascidiaceihabitans	0	0	0	0	0	0	0	0	0	0	0	0	0	0	0	0	0	0	0	0	0	0	0	0	0	0	0	0	0	0	0	0	0	0	0	0	0	0	0	0	0	0	0	0	0
Bacteria/Proteobacteria/Alphaproteobacteria/Rhodobacterales/Rhodobacteraceae/Boseongicola	0	0	0	0	0	0	0	0	0	0	0	0	0	0	0	0	0	0	0	0	0	0	0	0	0	0	0	0	0	0	0	0	0	0	0	0	0	0	0	0	0	0	0	0	0
Bacteria/Proteobacteria/Alphaproteobacteria/Rhodobacterales/Rhodobacteraceae/Celeribacter	0	0	0	0	0	0	0	0	0	0	0	0	0	0	0	0	0	0	0	0	0	0	0	0	0	0	0	0	0	0	0	0	0	0	0	0	0	0	0	0	0	0	0	0	0
Bacteria/Proteobacteria/Alphaproteobacteria/Rhodobacterales/Rhodobacteraceae/Cereibacter	0	0	0	0	0	0	0	0	0	0	0	0	0	0	0	0	0	0	0	0	0	0	0	0	0	0	0	0	0	0	0	0	0	0	0	0	0	0	0	0	0	0	0	0	0
Bacteria/Proteobacteria/Alphaproteobacteria/Rhodobacterales/Rhodobacteraceae/Defluviimonas	0	0	0	0	0	0	0	0	0	0	0	0	0	0	0	0	0	0	0	0	0	0	0	0	0	0	0	0	0	0	0	0	0	0	0	0	0	0	0	0	0	0	0	0	0
Bacteria/Proteobacteria/Alphaproteobacteria/Rhodobacterales/Rhodobacteraceae/Donghicola	0	0	0	0	0	0	0	0	0	0	0	0	0	0	0	0	0	0	0	0	0	0	0	0	0	0	0	0	0	0	0	0	0	0	0	0	0	0	0	0	0	0	0	0	0
Bacteria/Proteobacteria/Alphaproteobacteria/Rhodobacterales/Rhodobacteraceae/Falsirhodobacter	0	0	0	0	0	0	0	0	0	0	0	0	0	0	0	0	0	0	0	0	0	0	0	0	0	0	0	0	0	0	0	0	0	0	0	0	0	0	0	0	0	0	0	0	0
Bacteria/Proteobacteria/Alphaproteobacteria/Rhodobacterales/Rhodobacteraceae/Gemmobacter	0	0	0	0	0	0	0	0	0	0	0	0	0	0	0	0	0	0	0	0	0	0	0	0	0	0	0	0	0	0	0	0	0	0	0	0	0	0	0	0	0	0	0	0	0
Bacteria/Proteobacteria/Alphaproteobacteria/Rhodobacterales/Rhodobacteraceae/Haematobacter	0	0	0	0	0	0	0	0	0	0	0	0	0	0	0	0	0	0	0	0	0	0	0	0	0	0	0	0	0	0	0	0	0	0	0	0	0	0	0	0	0	0	0	0	0
Bacteria/Proteobacteria/Alphaproteobacteria/Rhodobacterales/Rhodobacteraceae/Halocynthiibacter	0	0	0	0	0	0	0	0	0	0	0	0	0	0	0	0	0	0	0	0	0	0	0	0	0	0	0	0	0	0	0	0	0	0	0	0	0	0	0	0	0	0	0	0	0
Bacteria/Proteobacteria/Alphaproteobacteria/Rhodobacterales/Rhodobacteraceae/Halodurantibacterium	0	0	0	0	0	0	0	0	0	0	0	0	0	0	0	0	0	0	0	0	0	0	0	0	0	0	0	0	0	0	0	0	0	0	0	0	0	0	0	0	0	0	0	0	0
Bacteria/Proteobacteria/Alphaproteobacteria/Rhodobacterales/Rhodobacteraceae/Halovulum	0	0	0	0	0	0	0	0	0	0	0	0	0	0	0	0	0	0	0	0	0	0	0	0	0	0	0	0	0	0	0	0	0	0	0	0	0	0	0	0	0	0	0	0	0
Bacteria/Proteobacteria/Alphaproteobacteria/Rhodobacterales/Rhodobacteraceae/HIMB11	0	0	0	0	0	0	0	0	0	0	0	0	0	0	0	0	0	0	0	0	0	0	0	0	0	0	0	0	0	0	0	0	0	0	0	0	0	0	0	0	0	0	0	0	0
Bacteria/Proteobacteria/Alphaproteobacteria/Rhodobacterales/Rhodobacteraceae/Jannaschia	0	0	0	0	0	0	0	0	0	0	0	0	0	0	0	0	0	0	0	0	0	0	0	0	0	0	0	0	0	0	0	0	0	0	0	0	0	0	0	0	0	0	0	0	0
Bacteria/Proteobacteria/Alphaproteobacteria/Rhodobacterales/Rhodobacteraceae/Jhaorihella	0	0	0	0	0	0	0	0	0	0	0	0	0	0	0	0	0	0	0	0	0	0	0	0	0	0	0	0	0	0	0	0	0	0	0	0	0	0	0	0	0	0	0	0	0
Bacteria/Proteobacteria/Alphaproteobacteria/Rhodobacterales/Rhodobacteraceae/Ketogulonicigenium	0	0	0	0	0	0	0	0	0	0	0	0	0	0	0	0	0	0	0	0	0	0	0	0	0	0	0	0	0	0	0	0	0	0	0	0	0	0	0	0	0	0	0	0	0
Bacteria/Proteobacteria/Alphaproteobacteria/Rhodobacterales/Rhodobacteraceae/Leisingera	0	0	0	0	0	0	0	0	0	0	0	0	0	0	0	0	0	0	0	0	0	0	0	0	0	0	0	0	0	0	0	0	0	0	0	0	0	0	0	0	0	0	0	0	0
Bacteria/Proteobacteria/Alphaproteobacteria/Rhodobacterales/Rhodobacteraceae/Lentibacter	0	0	0	0	0	0	0	0	0	0	0	0	0	0	0	0	0	0	0	0	0	0	0	0	0	0	0	0	0	0	0	0	0	0	0	0	0	0	0	0	0	0	0	0	0
Bacteria/Proteobacteria/Alphaproteobacteria/Rhodobacterales/Rhodobacteraceae/Litorimicrobium	0	0	0	0	0	0	0	0	0	0	0	0	0	0	0	0	0	0	0	0	0	0	0	0	0	0	0	0	0	0	0	0	0	0	0	0	0	0	0	0	0	0	0	0	0
Bacteria/Proteobacteria/Alphaproteobacteria/Rhodobacterales/Rhodobacteraceae/Loktanella	0	0	0	0	0	0	0	0	0	0	0	0	0	0	0	0	0	0	0	0	0	0	0	0	0	0	0	0	0	0	0	0	0	0	0	0	0	0	0	0	0	0	0	0	0
Bacteria/Proteobacteria/Alphaproteobacteria/Rhodobacterales/Rhodobacteraceae/Mameliella	0	0	0	0	0	0	0	0	0	0	0	0	0	0	0	0	0	0	0	0	0	0	0	0	0	0	0	0	0	0	0	0	0	0	0	0	0	0	0	0	0	0	0	0	0
Bacteria/Proteobacteria/Alphaproteobacteria/Rhodobacterales/Rhodobacteraceae/Marinibacterium	0	0	0	0	0	0	0	0	0	0	0	0	0	0	0	0	0	0	0	0	0	0	0	0	0	0	0	0	0	0	0	0	0	0	0	0	0	0	0	0	0	0	0	0	0
Bacteria/Proteobacteria/Alphaproteobacteria/Rhodobacterales/Rhodobacteraceae/Marinovum	0	0	0	0	0	0	0	0	0	0	0	0	0	0	0	0	0	0	0	0	0	0	0	0	0	0	0	0	0	0	0	0	0	0	0	0	0	0	0	0	0	0	0	0	0
Bacteria/Proteobacteria/Alphaproteobacteria/Rhodobacterales/Rhodobacteraceae/Maritimibacter	0	0	0	0	0	0	0	0	0	0	0	0	0	0	0	0	0	0	0	0	0	0	0	0	0	0	0	0	0	0	0	0	0	0	0	0	0	0	0	0	0	0	0	0	0
Bacteria/Proteobacteria/Alphaproteobacteria/Rhodobacterales/Rhodobacteraceae/Marivita	0	0	0	0	0	0	0	0	0	0	0	0	0	0	0	0	0	0	0	0	0	0	0	0	0	0	0	0	0	0	0	0	0	0	0	0	0	0	0	0	0	0	0	0	0
Bacteria/Proteobacteria/Alphaproteobacteria/Rhodobacterales/Rhodobacteraceae/Nioella	0	0	0	0	0	0	0	0	0	0	0	0	0	0	0	0	0	0	0	0	0	0	0	0	0	0	0	0	0	0	0	0	0	0	0	0	0	0	0	0	0	0	0	0	0
Bacteria/Proteobacteria/Alphaproteobacteria/Rhodobacterales/Rhodobacteraceae/Oceanicella	0	0	0	0	0	0	0	0	0	0	0	0	0	0	0	0	0	0	0	0	0	0	0	0	0	0	0	0	0	0	0	0	0	0	0	0	0	0	0	0	0	0	0	0	0
Bacteria/Proteobacteria/Alphaproteobacteria/Rhodobacterales/Rhodobacteraceae/Oceanicola	0	0	0	0	0	0	0	0	0	0	0	0	0	0	0	0	0	0	0	0	0	0	0	0	0	0	0	0	0	0	0	0	0	0	0	0	0	0	0	0	0	0	0	0	0
Bacteria/Proteobacteria/Alphaproteobacteria/Rhodobacterales/Rhodobacteraceae/Octadecabacter	0	0	0	0	0	0	0	0	0	0	0	0	0	0	0	0	0	0	0	0	0	0	0	0	0	0	0	0	0	0	0	0	0	0	0	0	0	0	0	0	0	0	0	0	0
Bacteria/Proteobacteria/Alphaproteobacteria/Rhodobacterales/Rhodobacteraceae/Paenirhodobacter	0	0	0	0	0	0	0	0	0	0	0	0	0	0	0	0	0	0	0	0	0	0	0	0	0	0	0	0	0	0	0	0	0	0	0	0	0	0	0	0	0	0	0	0	0
Bacteria/Proteobacteria/Alphaproteobacteria/Rhodobacterales/Rhodobacteraceae/Palleronia	0	0	0	0	0	0	0	0	0	0	0	0	0	0	0	0	0	0	0	0	0	0	0	0	0	0	0	0	0	0	0	0	0	0	0	0	0	0	0	0	0	0	0	0	0
Bacteria/Proteobacteria/Alphaproteobacteria/Rhodobacterales/Rhodobacteraceae/Paracoccus	0	0	0	0	0	0	0	0	0	0	0	0	0	0	0	0	0	0	0	0	0	0	0	0	0	0	0	0	0	0	0	0	0	0	0	0	0	0	0	0	0	0	0	0	0
Bacteria/Proteobacteria/Alphaproteobacteria/Rhodobacterales/Rhodobacteraceae/Pelagimonas	0	0	0	0	0	0	0	0	0	0	0	0	0	0	0	0	0	0	0	0	0	0	0	0	0	0	0	0	0	0	0	0	0	0	0	0	0	0	0	0	0	0	0	0	0
Bacteria/Proteobacteria/Alphaproteobacteria/Rhodobacterales/Rhodobacteraceae/Planktomarina	0	0	0	0	0	0	0	0	0	0	0	0	0	0	0	0	0	0	0	0	0	0	0	0	0	0	0	0	0	0	0	0	0	0	0	0	0	0	0	0	0	0	0	0	0
Bacteria/Proteobacteria/Alphaproteobacteria/Rhodobacterales/Rhodobacteraceae/Planktotalea	0	0	0	0	0	0	0	0	0	0	0	0	0	0	0	0	0	0	0	0	0	0	0	0	0	0	0	0	0	0	0	0	0	0	0	0	0	0	0	0	0	0	0	0	0
Bacteria/Proteobacteria/Alphaproteobacteria/Rhodobacterales/Rhodobacteraceae/Pontivivens	0	0	0	0	0	0	0	0	0	0	0	0	0	0	0	0	0	0	0	0	0	0	0	0	0	0	0	0	0	0	0	0	0	0	0	0	0	0	0	0	0	0	0	0	0
Bacteria/Proteobacteria/Alphaproteobacteria/Rhodobacterales/Rhodobacteraceae/Pseudooceanicola	0	0	0	0	0	0	0	0	0	0	0	0	0	0	0	0	0	0	0	0	0	0	0	0	0	0	0	0	0	0	0	0	0	0	0	0	0	0	0	0	0	0	0	0	0
Bacteria/Proteobacteria/Alphaproteobacteria/Rhodobacterales/Rhodobacteraceae/Pseudophaeobacter	0	0	0	0	0	0	0	0	0	0	0	0	0	0	0	0	0	0	0	0	0	0	0	0	0	0	0	0	0	0	0	0	0	0	0	0	0	0	0	0	0	0	0	0	0
Bacteria/Proteobacteria/Alphaproteobacteria/Rhodobacterales/Rhodobacteraceae/Pseudorhodobacter	0	0	0	0	0	0	0	0	0	0	0	0	0	0	0	0	0	0	0	0	0	0	0	0	0	0	0	0	0	0	0	0	0	0	0	0	0	0	0	0	0	0	0	0	0
Bacteria/Proteobacteria/Alphaproteobacteria/Rhodobacterales/Rhodobacteraceae/Puniceibacterium	0	0	0	0	0	0	0	0	0	0	0	0	0	0	0	0	0	0	0	0	0	0	0	0	0	0	0	0	0	0	0	0	0	0	0	0	0	0	0	0	0	0	0	0	0
Bacteria/Proteobacteria/Alphaproteobacteria/Rhodobacterales/Rhodobacteraceae/Rhodobaca	0	0	0	0	0	0	0	0	0	0	0	0	0	0	0	0	0	0	0	0	0	0	0	0	0	0	0	0	0	0	0	0	0	0	0	0	0	0	0	0	0	0	0	0	0
Bacteria/Proteobacteria/Alphaproteobacteria/Rhodobacterales/Rhodobacteraceae/Rhodobacter	0	0	0	0	0	0	0	0	0	0	0	0	0	0	0	0	0	0	0	0	0	0	0	0	0	0	0	0	0	0	0	0	0	0	0	0	0	0	0	0	0	0	0	0	0
Bacteria/Proteobacteria/Alphaproteobacteria/Rhodobacterales/Rhodobacteraceae/Rhodobaculum	0	0	0	0	0	0	0	0	0	0	0	0	0	0	0	0	0	0	0	0	0	0	0	0	0	0	0	0	0	0	0	0	0	0	0	0	0	0	0	0	0	0	0	0	0
Bacteria/Proteobacteria/Alphaproteobacteria/Rhodobacterales/Rhodobacteraceae/Rhodovulum	0	0	0	0	0	0	0	0	0	0	0	0	0	0	0	0	0	0	0	0	0	0	0	0	0	0	0	0	0	0	0	0	0	0	0	0	0	0	0	0	0	0	0	0	0
Bacteria/Proteobacteria/Alphaproteobacteria/Rhodobacterales/Rhodobacteraceae/Roseibacterium	0	0	0	0	0	0	0	0	0	0	0	0	0	0	0	0	0	0	0	0	0	0	0	0	0	0	0	0	0	0	0	0	0	0	0	0	0	0	0	0	0	0	0	0	0
Bacteria/Proteobacteria/Alphaproteobacteria/Rhodobacterales/Rhodobacteraceae/Roseicitreum	0	0	0	0	0	0	0	0	0	0	0	0	0	0	0	0	0	0	0	0	0	0	0	0	0	0	0	0	0	0	0	0	0	0	0	0	0	0	0	0	0	0	0	0	0
Bacteria/Proteobacteria/Alphaproteobacteria/Rhodobacterales/Rhodobacteraceae/Roseicyclus	0	0	0	0	0	0	0	0	0	0	0	0	0	0	0	0	0	0	0	0	0	0	0	0	0	0	0	0	0	0	0	0	0	0	0	0	0	0	0	0	0	0	0	0	0
Bacteria/Proteobacteria/Alphaproteobacteria/Rhodobacterales/Rhodobacteraceae/Roseinatronobacter	0	0	0	0	0	0	0	0	0	0	0	0	0	0	0	0	0	0	0	0	0	0	0	0	0	0	0	0	0	0	0	0	0	0	0	0	0	0	0	0	0	0	0	0	0
Bacteria/Proteobacteria/Alphaproteobacteria/Rhodobacterales/Rhodobacteraceae/Roseivivax	0	0	0	0	0	0	0	0	0	0	0	0	0	0	0	0	0	0	0	0	0	0	0	0	0	0	0	0	0	0	0	0	0	0	0	0	0	0	0	0	0	0	0	0	0
Bacteria/Proteobacteria/Alphaproteobacteria/Rhodobacterales/Rhodobacteraceae/Roseobacter clade CHAB-I-5 lineage	0	0	0	0	0	0	0	0	0	0	0	0	0	0	0	0	0	0	0	0	0	0	0	0	0	0	0	0	0	0	0	0	0	0	0	0	0	0	0	0	0	0	0	0	0
Bacteria/Proteobacteria/Alphaproteobacteria/Rhodobacterales/Rhodobacteraceae/Roseobacter clade NAC11-7 lineage	211	72	97	93	78	79	58	0	0	0	0	0	95	59	81	101	70	79	0	76	0	68	0	0	0	47	0	67	43	53	50	0	0	0	52	65	0	55	0	55	0	63	0	0	0
Bacteria/Proteobacteria/Alphaproteobacteria/Rhodobacterales/Rhodobacteraceae/Roseobacter	0	0	0	0	0	0	0	0	0	0	0	0	0	0	0	0	0	0	0	0	0	0	0	0	0	0	0	0	0	0	0	0	0	0	0	0	0	0	0	0	0	0	0	0	0
Bacteria/Proteobacteria/Alphaproteobacteria/Rhodobacterales/Rhodobacteraceae/Roseovarius	0	0	0	0	0	0	0	0	0	0	0	0	0	0	0	0	0	0	0	0	0	0	0	0	0	0	0	0	0	0	0	0	0	0	0	0	0	0	0	0	0	0	0	0	0
Bacteria/Proteobacteria/Alphaproteobacteria/Rhodobacterales/Rhodobacteraceae/Rubellimicrobium	0	0	0	0	0	0	0	0	0	0	0	0	0	0	0	0	0	0	0	0	0	0	0	0	0	0	0	0	0	0	0	0	0	0	0	0	0	0	0	0	0	0	0	0	0
Bacteria/Proteobacteria/Alphaproteobacteria/Rhodobacterales/Rhodobacteraceae/Rubribacterium	0	0	0	0	0	0	0	0	0	0	0	0	0	0	0	0	0	0	0	0	0	0	0	0	0	0	0	0	0	0	0	0	0	0	0	0	0	0	0	0	0	0	0	0	0
Bacteria/Proteobacteria/Alphaproteobacteria/Rhodobacterales/Rhodobacteraceae/Rubrimonas	0	0	0	0	0	0	0	0	0	0	0	0	0	0	0	0	0	0	0	0	0	0	0	0	0	0	0	0	0	0	0	0	0	0	0	0	0	0	0	0	0	0	0	0	0
Bacteria/Proteobacteria/Alphaproteobacteria/Rhodobacterales/Rhodobacteraceae/Ruegeria	0	0	0	0	0	0	0	0	0	0	0	0	0	0	0	0	0	0	0	0	0	0	0	0	0	0	0	0	0	0	0	0	0	0	0	0	0	0	0	0	0	0	0	0	0
Bacteria/Proteobacteria/Alphaproteobacteria/Rhodobacterales/Rhodobacteraceae/Sagittula	0	0	0	0	0	0	0	0	0	0	0	0	0	0	0	0	0	0	0	0	0	0	0	0	0	0	0	0	0	0	0	0	0	0	0	0	0	0	0	0	0	0	0	0	0
Bacteria/Proteobacteria/Alphaproteobacteria/Rhodobacterales/Rhodobacteraceae/Salinihabitans	0	0	0	0	0	0	0	0	0	0	0	0	0	0	0	0	0	0	0	0	0	0	0	0	0	0	0	0	0	0	0	0	0	0	0	0	0	0	0	0	0	0	0	0	0
Bacteria/Proteobacteria/Alphaproteobacteria/Rhodobacterales/Rhodobacteraceae/Sedimentitalea	0	0	0	0	0	0	0	0	0	0	0	0	0	0	0	0	0	0	0	0	0	0	0	0	0	0	0	0	0	0	0	0	0	0	0	0	0	0	0	0	0	0	0	0	0
Bacteria/Proteobacteria/Alphaproteobacteria/Rhodobacterales/Rhodobacteraceae/Sediminimonas	0	0	0	0	0	0	0	0	0	0	0	0	0	0	0	0	0	0	0	0	0	0	0	0	0	0	0	0	0	0	0	0	0	0	0	0	0	0	0	0	0	0	0	0	0
Bacteria/Proteobacteria/Alphaproteobacteria/Rhodobacterales/Rhodobacteraceae/Seohaeicola	0	0	0	0	0	0	0	0	0	0	0	0	0	0	0	0	0	0	0	0	0	0	0	0	0	0	0	0	0	0	0	0	0	0	0	0	0	0	0	0	0	0	0	0	0
Bacteria/Proteobacteria/Alphaproteobacteria/Rhodobacterales/Rhodobacteraceae/Shimia	0	0	0	0	0	0	0	0	0	0	0	0	0	0	0	0	0	0	0	0	0	0	0	0	0	0	0	0	0	0	0	0	0	0	0	0	0	0	0	0	0	0	0	0	0
Bacteria/Proteobacteria/Alphaproteobacteria/Rhodobacterales/Rhodobacteraceae/Silicimonas	0	0	0	0	0	0	0	0	0	0	0	0	0	0	0	0	0	0	0	0	0	0	0	0	0	0	0	0	0	0	0	0	0	0	0	0	0	0	0	0	0	0	0	0	0
Bacteria/Proteobacteria/Alphaproteobacteria/Rhodobacterales/Rhodobacteraceae/Sulfitobacter	0	0	0	0	0	0	0	0	0	0	0	0	0	0	0	0	0	0	0	0	0	0	0	0	0	0	0	0	0	0	0	0	0	0	0	0	0	0	0	0	0	0	0	0	0
Bacteria/Proteobacteria/Alphaproteobacteria/Rhodobacterales/Rhodobacteraceae/Tabrizicola	0	0	0	0	0	0	0	0	0	0	0	0	0	0	0	0	0	0	0	0	0	0	0	0	0	0	0	0	0	0	0	0	0	0	0	0	0	0	0	0	0	0	0	0	0
Bacteria/Proteobacteria/Alphaproteobacteria/Rhodobacterales/Rhodobacteraceae/Tateyamaria	0	0	0	0	0	0	0	0	0	0	0	0	0	0	0	0	0	0	0	0	0	0	0	0	0	0	0	0	0	0	0	0	0	0	0	0	0	0	0	0	0	0	0	0	0
Bacteria/Proteobacteria/Alphaproteobacteria/Rhodobacterales/Rhodobacteraceae/Thalassobius	0	0	0	0	0	0	0	0	0	0	0	0	0	0	0	0	0	0	0	0	0	0	0	0	0	0	0	0	0	0	0	0	0	0	0	0	0	0	0	0	0	0	0	0	0
Bacteria/Proteobacteria/Alphaproteobacteria/Rhodobacterales/Rhodobacteraceae/Thioclava	0	0	0	0	0	0	0	0	0	0	0	0	0	0	0	0	0	0	0	0	0	0	0	0	0	0	0	0	0	0	0	0	0	0	0	0	0	0	0	0	0	0	0	0	0
Bacteria/Proteobacteria/Alphaproteobacteria/Rhodobacterales/Rhodobacteraceae/Tropicibacter	0	0	0	0	0	0	0	0	0	0	0	0	0	0	0	0	0	0	0	0	0	0	0	0	0	0	0	0	0	0	0	0	0	0	0	0	0	0	0	0	0	0	0	0	0
Bacteria/Proteobacteria/Alphaproteobacteria/Rhodobacterales/Rhodobacteraceae/Tropicimonas	0	0	0	0	0	0	0	0	0	0	0	0	0	0	0	0	0	0	0	0	0	0	0	0	0	0	0	0	0	0	0	0	0	0	0	0	0	0	0	0	0	0	0	0	0
Bacteria/Proteobacteria/Alphaproteobacteria/Rhodobacterales/Rhodobacteraceae/uncultured	393	309	311	253	0	184	559	421	355	139	175	0	317	354	272	396	481	318	243	213	208	315	441	405	350	328	360	266	216	353	301	228	262	411	254	306	356	244	330	378	315	224	361	279	358
Bacteria/Proteobacteria/Alphaproteobacteria/Rhodobacterales/Rhodobacteraceae/Xuhuaishuia	0	0	0	0	0	0	0	0	0	0	0	0	0	0	0	0	0	0	0	0	0	0	0	0	0	0	0	0	0	0	0	0	0	0	0	0	0	0	0	0	0	0	0	0	0
Bacteria/Proteobacteria/Alphaproteobacteria/Rhodospirillales/Magnetospiraceae/Magnetospira	0	0	0	0	0	0	0	0	0	0	0	0	0	0	0	0	0	0	0	0	0	0	0	0	0	0	0	0	0	0	0	0	0	0	0	0	0	0	0	0	0	0	0	0	0
Bacteria/Proteobacteria/Alphaproteobacteria/Rhodospirillales/Magnetospiraceae/Magnetovibrio	0	0	0	0	0	0	0	0	0	0	0	0	0	0	0	0	0	0	0	0	0	0	0	0	0	0	0	0	0	0	0	0	0	0	0	0	0	0	0	0	0	0	0	0	0
Bacteria/Proteobacteria/Alphaproteobacteria/Rhodospirillales/Magnetospiraceae/uncultured	0	0	0	0	0	0	0	0	0	0	0	0	0	0	0	0	0	0	0	0	0	0	0	0	0	0	0	0	0	0	0	0	0	46	0	0	0	0	0	0	50	0	0	0	0
Bacteria/Proteobacteria/Alphaproteobacteria/Rhodospirillales/Magnetospiraceae/Varunaivibrio	0	0	0	0	0	0	0	0	0	0	0	0	0	0	0	0	0	0	0	0	0	0	0	0	0	0	0	0	0	0	0	0	0	0	0	0	0	0	0	0	0	0	0	0	0
Bacteria/Proteobacteria/Alphaproteobacteria/Rhodospirillales/Magnetospirillaceae/Magnetospirillum	0	0	0	0	0	0	0	0	0	0	0	0	0	0	0	0	0	0	0	0	0	0	0	0	0	0	0	0	0	0	0	0	0	0	0	0	0	0	0	0	0	0	0	0	0
Bacteria/Proteobacteria/Alphaproteobacteria/Rhodospirillales/Magnetospirillaceae/Phaeospirillum	0	0	0	0	0	0	0	0	0	0	0	0	0	0	0	0	0	0	0	0	0	0	0	0	0	0	0	0	0	0	0	0	0	0	0	0	0	0	0	0	0	0	0	0	0
Bacteria/Proteobacteria/Alphaproteobacteria/Rhodospirillales/Magnetospirillaceae/Telmatospirillum	0	0	0	0	0	0	0	0	0	0	0	0	0	0	0	0	0	0	0	0	0	0	0	0	0	0	0	0	0	0	0	0	0	0	0	0	0	0	0	0	0	0	0	0	0
Bacteria/Proteobacteria/Alphaproteobacteria/Rhodospirillales/Magnetospirillaceae/uncultured	0	0	0	0	0	0	0	0	0	0	0	0	0	0	0	0	0	0	0	0	0	0	0	0	0	0	0	0	0	0	0	0	0	0	0	0	0	0	0	0	0	0	0	0	0
Bacteria/Proteobacteria/Alphaproteobacteria/Rhodospirillales/Rhodopirillaceae/Defluviicoccus	30	18	0	0	0	0	29	21	0	17	21	0	0	0	0	0	17	0	0	23	19	0	0	0	0	0	0	28	0	19	0	0	0	34	35	55	16	17	20	0	0	0	39	35	27
Bacteria/Proteobacteria/Alphaproteobacteria/Rhodospirillales/Rhodospirillaceae/BRH-c57	0	0	0	0	0	0	0	0	0	0	0	0	0	0	0	0	0	0	0	0	0	0	0	0	0	0	0	0	0	0	0	0	0	0	0	0	0	0	0	0	0	0	0	0	0
Bacteria/Proteobacteria/Alphaproteobacteria/Rhodospirillales/Rhodospirillaceae/Candidatus Riegeria	0	0	0	0	0	0	0	0	0	0	0	0	0	0	0	0	0	0	0	0	0	0	0	0	0	0	0	0	0	0	0	0	0	0	0	0	0	0	0	0	0	0	0	0	0
Bacteria/Proteobacteria/Alphaproteobacteria/Rhodospirillales/Rhodospirillaceae/Haematospirillum	0	0	0	0	0	0	0	0	0	0	0	0	0	0	0	0	0	0	0	0	0	0	0	0	0	0	0	0	0	0	0	0	0	0	0	0	0	0	0	0	0	0	0	0	0
Bacteria/Proteobacteria/Alphaproteobacteria/Rhodospirillales/Rhodospirillaceae/Marispirillum	0	0	0	0	0	0	0	0	0	0	0	0	0	0	0	0	0	0	0	0	0	0	0	0	0	0	0	0	0	0	0	0	0	0	0	0	0	0	0	0	0	0	0	0	0
Bacteria/Proteobacteria/Alphaproteobacteria/Rhodospirillales/Rhodospirillaceae/Novispirillum	0	0	0	0	0	0	0	0	0	0	0	0	0	0	0	0	0	0	0	0	0	0	0	0	0	0	0	0	0	0	0	0	0	0	0	0	0	0	0	0	0	0	0	0	0
Bacteria/Proteobacteria/Alphaproteobacteria/Rhodospirillales/Rhodospirillaceae/Pararhodospirillum	0	0	0	0	0	0	0	0	0	0	0	0	0	0	0	0	0	0	0	0	0	0	0	0	0	0	0	0	0	0	0	0	0	0	0	0	0	0	0	0	0	0	0	0	0
Bacteria/Proteobacteria/Alphaproteobacteria/Rhodospirillales/Rhodospirillaceae/Roseospira	0	0	0	0	0	0	0	0	0	0	0	0	0	0	0	0	0	0	0	0	0	0	0	0	0	0	0	0	0	0	0	0	0	0	0	0	0	0	0	0	0	0	0	0	0
Bacteria/Proteobacteria/Alphaproteobacteria/Rhodospirillales/Rhodospirillaceae/Roseospirillum	0	0	0	0	0	0	0	0	0	0	0	0	0	0	0	0	0	0	0	0	0	0	0	0	0	0	0	0	0	0	0	0	0	0	0	0	0	0	0	0	0	0	0	0	0
Bacteria/Proteobacteria/Alphaproteobacteria/Rhodospirillales/Rhodospirillaceae/uncultured	0	0	0	0	0	0	0	0	0	0	0	0	0	0	0	0	0	0	0	0	0	0	0	0	0	0	0	0	0	0	0	0	0	0	0	0	0	0	0	0	0	0	0	0	0
Bacteria/Proteobacteria/Alphaproteobacteria/Rhodospirillales/Terasakiellaceae/Terasakiella	0	0	0	0	0	0	0	0	0	0	0	0	0	0	0	0	0	0	0	0	0	0	0	0	0	0	0	0	0	0	0	0	0	0	0	0	0	0	0	0	0	0	0	0	0
Bacteria/Proteobacteria/Alphaproteobacteria/Rhodospirillales/Terasakiellaceae/uncultured	0	0	0	0	0	0	0	0	0	0	0	0	0	0	0	0	0	0	0	0	0	0	0	0	0	0	0	0	0	0	0	0	0	0	0	0	0	0	0	0	0	0	0	0	0
Bacteria/Proteobacteria/Alphaproteobacteria/Rhodospirillales/Thalassospiraceae/Thalassospira	0	0	0	0	0	0	0	0	0	0	0	0	0	0	0	0	0	0	0	0	0	0	0	0	0	0	0	0	0	0	0	0	0	0	0	0	0	0	0	0	0	0	0	0	0
Bacteria/Proteobacteria/Alphaproteobacteria/Rhodovibrionales/Fodinicurvataceae/Fodinicurvata	0	0	0	0	0	0	0	0	0	0	0	0	0	0	0	0	0	0	0	0	0	0	0	0	0	0	0	0	0	0	0	0	0	0	0	0	0	0	0	0	0	0	0	0	0
Bacteria/Proteobacteria/Alphaproteobacteria/Rhodovibrionales/Fodinicurvataceae/Limimonas	0	0	0	0	0	0	0	0	0	0	0	0	0	0	0	0	0	0	0	0	0	0	0	0	0	0	0	0	0	0	0	0	0	0	0	0	0	0	0	0	0	0	0	0	0
Bacteria/Proteobacteria/Alphaproteobacteria/Rhodovibrionales/Fodinicurvataceae/Rhodovibrio	0	0	0	0	0	0	0	0	0	0	0	0	0	0	0	0	0	0	0	0	0	0	0	0	0	0	0	0	0	0	0	0	0	0	0	0	0	0	0	0	0	0	0	0	0
Bacteria/Proteobacteria/Alphaproteobacteria/Rhodovibrionales/Fodinicurvataceae/uncultured	0	0	0	0	0	0	0	0	0	0	0	0	0	0	0	0	0	0	0	0	0	0	0	0	0	0	0	0	0	0	0	0	0	0	0	0	0	0	0	0	0	0	0	0	0
Bacteria/Proteobacteria/Alphaproteobacteria/Rhodovibrionales/Kiloniellaceae/Kiloniella	0	0	0	0	0	0	0	0	0	0	0	0	0	0	0	0	0	0	0	0	0	0	0	0	0	0	0	0	0	0	0	0	0	0	0	0	0	0	0	0	0	0	0	0	0
Bacteria/Proteobacteria/Alphaproteobacteria/Rhodovibrionales/Kiloniellaceae/Limibacillus	0	0	0	0	0	0	0	0	0	0	0	0	0	0	0	0	0	0	0	0	0	0	0	0	0	0	0	0	0	0	0	0	0	0	0	0	0	0	0	0	0	0	0	0	0
Bacteria/Proteobacteria/Alphaproteobacteria/Rhodovibrionales/Kiloniellaceae/Pelagibius	0	0	0	0	0	0	0	0	0	0	0	0	0	0	0	0	0	0	0	0	0	0	0	0	0	0	0	0	0	0	0	0	0	0	0	0	0	0	0	0	0	0	0	0	0
Bacteria/Proteobacteria/Alphaproteobacteria/Rhodovibrionales/Kiloniellaceae/Tagaea	0	0	0	0	0	0	0	0	0	0	0	0	0	0	0	0	0	0	0	0	0	0	0	0	0	0	0	0	0	0	0	0	0	0	0	0	0	0	0	0	0	0	0	0	0
Bacteria/Proteobacteria/Alphaproteobacteria/Rhodovibrionales/Kiloniellaceae/Tistlia	0	0	0	0	0	0	0	0	0	0	0	0	0	0	0	0	0	0	0	0	0	0	0	0	0	0	0	0	0	0	0	0	0	0	0	0	0	0	0	0	0	0	0	0	0
Bacteria/Proteobacteria/Alphaproteobacteria/Rhodovibrionales/Kiloniellaceae/uncultured	0	0	0	0	0	0	0	57	0	0	0	0	0	0	0	0	0	0	0	0	0	0	0	0	0	0	0	0	0	0	0	0	0	0	0	0	0	0	0	0	0	0	0	0	0
Bacteria/Proteobacteria/Alphaproteobacteria/Rickettsiales/Anaplasmataceae/Anaplasma	0	0	0	0	0	0	0	0	0	0	0	0	0	0	0	0	0	0	0	0	0	0	0	0	0	0	0	0	0	0	0	0	0	0	0	0	0	0	0	0	0	0	0	0	0
Bacteria/Proteobacteria/Alphaproteobacteria/Rickettsiales/Anaplasmataceae/Candidatus Neoehrlichia	0	0	0	0	0	0	0	0	0	0	0	0	0	0	0	0	0	0	0	0	0	0	0	0	0	0	0	0	0	0	0	0	0	0	0	0	0	0	0	0	0	0	0	0	0
Bacteria/Proteobacteria/Alphaproteobacteria/Rickettsiales/Anaplasmataceae/Candidatus Xenohaliotis	0	0	0	0	0	0	0	0	0	0	0	0	0	0	0	0	0	0	0	0	0	0	0	0	0	0	0	0	0	0	0	0	0	0	0	0	0	0	0	0	0	0	0	0	0
Bacteria/Proteobacteria/Alphaproteobacteria/Rickettsiales/Anaplasmataceae/Ehrlichia	0	0	0	0	0	0	0	0	0	0	0	0	0	0	0	0	0	0	0	0	0	0	0	0	0	0	0	0	0	0	0	0	0	0	0	0	0	0	0	0	0	0	0	0	0
Bacteria/Proteobacteria/Alphaproteobacteria/Rickettsiales/Anaplasmataceae/Neorickettsia	0	0	0	0	0	0	0	0	0	0	0	0	0	0	0	0	0	0	0	0	0	0	0	0	0	0	0	0	0	0	0	0	0	0	0	0	0	0	0	0	0	0	0	0	0
Bacteria/Proteobacteria/Alphaproteobacteria/Rickettsiales/Anaplasmataceae/uncultured	0	0	0	0	0	0	0	0	0	0	0	0	0	0	0	0	0	0	0	0	0	0	0	0	0	0	0	0	0	0	0	0	0	0	0	0	0	0	0	0	0	0	0	0	0
Bacteria/Proteobacteria/Alphaproteobacteria/Rickettsiales/Anaplasmataceae/Wolbachia	0	0	0	0	0	0	0	0	0	0	0	0	0	0	0	0	0	0	0	0	0	0	0	0	0	0	0	0	0	0	0	0	0	0	0	0	0	0	0	0	0	0	0	0	0
Bacteria/Proteobacteria/Alphaproteobacteria/Rickettsiales/Midichloriaceae/Candidatus Anadelfobacter	0	0	0	0	0	0	0	0	0	0	0	0	0	0	0	0	0	0	0	0	0	0	0	0	0	0	0	0	0	0	0	0	0	0	0	0	0	0	0	0	0	0	0	0	0
Bacteria/Proteobacteria/Alphaproteobacteria/Rickettsiales/Midichloriaceae/Candidatus Cyrtobacter	0	0	0	0	0	0	0	0	0	0	0	0	0	0	0	0	0	0	0	0	0	0	0	0	0	0	0	0	0	0	0	0	0	0	0	0	0	0	0	0	0	0	0	0	0
Bacteria/Proteobacteria/Alphaproteobacteria/Rickettsiales/Midichloriaceae/Candidatus Defluviella	0	0	0	0	0	0	0	0	0	0	0	0	0	0	0	0	0	0	0	0	0	0	0	0	0	0	0	0	0	0	0	0	0	0	0	0	0	0	0	0	0	0	0	0	0
Bacteria/Proteobacteria/Alphaproteobacteria/Rickettsiales/Midichloriaceae/Candidatus Fokinia	0	0	0	0	0	0	0	0	0	0	0	0	0	0	0	0	0	0	0	0	0	0	0	0	0	0	0	0	0	0	0	0	0	0	0	0	0	0	0	0	0	0	0	0	0
Bacteria/Proteobacteria/Alphaproteobacteria/Rickettsiales/Midichloriaceae/Candidatus Jidaibacter	0	0	0	0	0	0	0	0	0	0	0	0	0	0	0	0	0	0	0	0	0	0	0	0	0	0	0	0	0	0	0	0	0	0	0	0	0	0	0	0	0	0	0	0	0
Bacteria/Proteobacteria/Alphaproteobacteria/Rickettsiales/Midichloriaceae/Candidatus Lariskella	0	0	0	0	0	0	0	0	0	0	0	0	0	0	0	0	0	0	0	0	0	0	0	0	0	0	0	0	0	0	0	0	0	0	0	0	0	0	0	0	0	0	0	0	0
Bacteria/Proteobacteria/Alphaproteobacteria/Rickettsiales/Midichloriaceae/Candidatus Midichloria	0	0	0	0	0	0	0	0	0	0	0	0	0	0	0	0	0	0	0	0	0	0	0	0	0	0	0	0	0	0	0	0	0	0	0	0	0	0	0	0	0	0	0	0	0
Bacteria/Proteobacteria/Alphaproteobacteria/Rickettsiales/Midichloriaceae/MD3-55	0	0	0	0	0	0	0	0	0	0	0	0	0	0	0	0	0	0	0	0	0	0	0	0	0	0	0	0	0	0	0	0	0	0	0	0	0	0	0	0	0	0	0	0	0
Bacteria/Proteobacteria/Alphaproteobacteria/Rickettsiales/Midichloriaceae/uncultured	0	0	0	0	0	0	0	0	0	0	0	0	0	0	0	0	0	0	0	0	0	0	0	0	0	0	0	0	0	0	0	0	0	0	0	0	0	0	0	0	0	0	0	0	0
Bacteria/Proteobacteria/Alphaproteobacteria/Rickettsiales/Rickettsiaceae/Ac37b	0	0	0	0	0	0	0	0	0	0	0	0	0	0	0	0	0	0	0	0	0	0	0	0	0	0	0	0	0	0	0	0	0	0	0	0	0	0	0	0	0	0	0	0	0
Bacteria/Proteobacteria/Alphaproteobacteria/Rickettsiales/Rickettsiaceae/Candidatus Arcanobacter	0	0	0	0	0	0	0	0	0	0	0	0	0	0	0	0	0	0	0	0	0	0	0	0	0	0	0	0	0	0	0	0	0	0	0	0	0	0	0	0	0	0	0	0	0
Bacteria/Proteobacteria/Alphaproteobacteria/Rickettsiales/Rickettsiaceae/Candidatus Cryptoprodotis	0	0	0	0	0	0	0	0	0	0	0	0	0	0	0	0	0	0	0	0	0	0	0	0	0	0	0	0	0	0	0	0	0	0	0	0	0	0	0	0	0	0	0	0	0
Bacteria/Proteobacteria/Alphaproteobacteria/Rickettsiales/Rickettsiaceae/Candidatus Gigarickettsia	0	0	0	0	0	0	0	0	0	0	0	0	0	0	0	0	0	0	0	0	0	0	0	0	0	0	0	0	0	0	0	0	0	0	0	0	0	0	0	0	0	0	0	0	0
Bacteria/Proteobacteria/Alphaproteobacteria/Rickettsiales/Rickettsiaceae/Candidatus Hemipteriphilus	0	0	0	0	0	0	0	0	0	0	0	0	0	0	0	0	0	0	0	0	0	0	0	0	0	0	0	0	0	0	0	0	0	0	0	0	0	0	0	0	0	0	0	0	0
Bacteria/Proteobacteria/Alphaproteobacteria/Rickettsiales/Rickettsiaceae/Candidatus Megaira	0	0	0	0	0	0	0	0	0	0	0	0	0	0	0	0	0	0	0	0	0	0	0	0	0	0	0	0	0	0	0	0	0	0	0	0	0	0	0	0	0	0	0	0	0
Bacteria/Proteobacteria/Alphaproteobacteria/Rickettsiales/Rickettsiaceae/Candidatus Trichorickettsia	0	0	0	0	0	0	0	0	0	0	0	0	0	0	0	0	0	0	0	0	0	0	0	0	0	0	0	0	0	0	0	0	0	0	0	0	0	0	0	0	0	0	0	0	0
Bacteria/Proteobacteria/Alphaproteobacteria/Rickettsiales/Rickettsiaceae/Orientia	0	0	0	0	0	0	0	0	0	0	0	0	0	0	0	0	0	0	0	0	0	0	0	0	0	0	0	0	0	0	0	0	0	0	0	0	0	0	0	0	0	0	0	0	0
Bacteria/Proteobacteria/Alphaproteobacteria/Rickettsiales/Rickettsiaceae/Rickettsia	0	0	0	0	0	0	0	0	0	0	0	0	0	0	0	0	0	0	0	0	0	0	0	0	0	0	0	0	0	0	0	0	0	0	0	0	0	0	0	0	0	0	0	0	0
Bacteria/Proteobacteria/Alphaproteobacteria/Rickettsiales/Rickettsiaceae/uncultured	0	0	0	0	0	0	0	0	0	0	0	0	0	0	0	0	0	0	0	0	0	0	0	0	0	0	0	0	0	0	0	0	0	0	0	0	0	0	0	0	0	0	0	0	0
Bacteria/Proteobacteria/Alphaproteobacteria/Rickettsiales/Rickettsiales Incertae Sedis/Candidatus Hepatincola	0	0	0	0	0	0	0	0	0	0	0	0	0	0	0	0	0	0	0	0	0	0	0	0	0	0	0	0	0	0	0	0	0	0	0	0	0	0	0	0	0	0	0	0	0
Bacteria/Proteobacteria/Alphaproteobacteria/SAR11 clade/Clade I/Clade Ia	0	0	0	0	0	0	0	0	0	0	0	0	0	0	0	0	0	0	0	0	0	0	0	0	0	0	0	0	0	0	0	0	0	0	0	0	0	0	0	0	0	0	0	0	0
Bacteria/Proteobacteria/Alphaproteobacteria/SAR11 clade/Clade I/Clade Ib	0	0	0	0	0	0	0	0	0	0	0	0	0	0	0	0	0	0	0	0	0	0	0	0	0	0	0	0	0	0	0	0	0	0	0	0	0	0	0	0	0	0	0	0	0
Bacteria/Proteobacteria/Alphaproteobacteria/SAR11 clade/Clade I/uncultured	0	0	0	0	0	0	0	0	0	0	0	0	0	0	0	0	0	0	0	0	0	0	0	0	0	0	0	0	0	0	0	0	0	0	0	0	0	0	0	0	0	0	0	0	0
Bacteria/Proteobacteria/Alphaproteobacteria/Sneathiellales/Sneathiellaceae/AT-s3-44	0	0	0	0	0	0	0	0	0	0	0	0	0	0	0	0	0	0	0	0	0	0	0	0	0	0	0	0	0	0	0	0	0	0	0	0	0	0	0	0	0	0	0	0	0
Bacteria/Proteobacteria/Alphaproteobacteria/Sneathiellales/Sneathiellaceae/Ferrovibrio	0	0	0	0	0	0	0	0	0	0	0	0	0	0	0	0	0	0	0	0	0	0	0	0	0	0	0	0	0	0	0	0	0	0	0	0	0	0	0	0	0	0	0	0	0
Bacteria/Proteobacteria/Alphaproteobacteria/Sneathiellales/Sneathiellaceae/Sneathiella	0	0	0	0	0	0	0	0	0	0	0	0	0	0	0	0	0	0	0	0	0	0	0	0	0	0	0	0	0	0	0	0	0	0	0	0	0	0	0	0	0	0	0	0	0
Bacteria/Proteobacteria/Alphaproteobacteria/Sneathiellales/Sneathiellaceae/Taonella	0	0	0	0	0	0	0	0	0	0	0	0	0	0	0	0	0	0	0	0	0	0	0	0	0	0	0	0	0	0	0	0	0	0	0	0	0	0	0	0	0	0	0	0	0
Bacteria/Proteobacteria/Alphaproteobacteria/Sneathiellales/Sneathiellaceae/uncultured	0	0	0	0	0	0	0	0	0	0	0	0	0	0	0	0	0	0	0	0	0	0	0	0	0	0	0	0	0	0	0	0	0	0	0	0	0	0	0	0	0	0	0	0	0
Bacteria/Proteobacteria/Alphaproteobacteria/Sphingomonadales/Sphingomonadaceae/Altererythrobacter	0	0	0	0	0	0	0	0	0	0	0	0	0	0	0	0	0	0	0	0	0	0	0	0	0	0	0	0	0	0	0	0	0	0	0	0	0	0	0	0	0	0	0	0	0
Bacteria/Proteobacteria/Alphaproteobacteria/Sphingomonadales/Sphingomonadaceae/DSSF69	0	0	0	0	0	0	0	0	0	0	0	0	0	0	0	0	0	0	0	0	0	0	0	0	0	0	0	0	0	0	0	0	0	0	0	0	0	0	0	0	0	0	0	0	0
Bacteria/Proteobacteria/Alphaproteobacteria/Sphingomonadales/Sphingomonadaceae/Ellin6055	0	0	0	0	0	0	0	0	0	0	0	0	0	0	0	0	0	0	0	0	0	0	0	0	0	0	0	0	0	0	0	0	0	0	0	0	0	0	0	0	0	0	0	0	0
Bacteria/Proteobacteria/Alphaproteobacteria/Sphingomonadales/Sphingomonadaceae/Erythrobacter	0	0	0	0	0	0	0	0	0	0	0	0	0	0	0	0	0	0	0	0	0	0	0	0	0	0	0	0	0	0	0	0	0	0	0	0	0	0	0	0	0	0	0	0	0
Bacteria/Proteobacteria/Alphaproteobacteria/Sphingomonadales/Sphingomonadaceae/Novosphingobium	0	0	0	0	0	0	0	0	0	0	0	0	0	0	0	0	0	0	0	0	0	0	0	0	0	0	0	0	0	0	0	0	0	0	0	0	0	0	0	0	0	0	0	0	0
Bacteria/Proteobacteria/Alphaproteobacteria/Sphingomonadales/Sphingomonadaceae/Plot4-2H12	0	0	0	0	0	0	0	0	0	0	0	0	0	0	0	0	0	0	0	0	0	0	0	0	0	0	0	0	0	0	0	0	0	0	0	0	0	0	0	0	0	0	0	0	0
Bacteria/Proteobacteria/Alphaproteobacteria/Sphingomonadales/Sphingomonadaceae/Polymorphobacter	0	0	0	0	0	0	0	0	0	0	0	0	0	0	0	0	0	0	0	0	0	0	0	0	0	0	0	0	0	0	0	0	0	0	0	0	0	0	0	0	0	0	0	0	0
Bacteria/Proteobacteria/Alphaproteobacteria/Sphingomonadales/Sphingomonadaceae/Porphyrobacter	0	0	0	0	0	0	0	0	0	0	0	0	0	0	0	0	0	0	0	0	0	0	0	0	0	0	0	0	0	0	0	0	0	0	0	0	0	0	0	0	0	0	0	0	0
Bacteria/Proteobacteria/Alphaproteobacteria/Sphingomonadales/Sphingomonadaceae/Qipengyuania	0	0	0	0	0	0	0	0	0	0	0	0	0	0	0	0	0	0	0	0	0	0	0	0	0	0	0	0	0	0	0	0	0	0	0	0	0	0	0	0	0	0	0	0	0
Bacteria/Proteobacteria/Alphaproteobacteria/Sphingomonadales/Sphingomonadaceae/Rhizorhapis	0	0	0	0	0	0	0	0	0	0	0	0	0	0	0	0	0	0	0	0	0	0	0	0	0	0	0	0	0	0	0	0	0	0	0	0	0	0	0	0	0	0	0	0	0
Bacteria/Proteobacteria/Alphaproteobacteria/Sphingomonadales/Sphingomonadaceae/Sandaracinobacter	0	0	0	0	0	0	0	0	0	0	0	0	0	0	0	0	0	0	0	0	0	0	0	0	0	0	0	0	0	0	0	0	0	0	0	0	0	0	0	0	0	0	0	0	0
Bacteria/Proteobacteria/Alphaproteobacteria/Sphingomonadales/Sphingomonadaceae/Sandarakinorhabdus	0	0	0	0	0	0	0	0	0	0	0	0	0	0	0	0	0	0	0	0	0	0	0	0	0	0	0	0	0	0	0	0	0	0	0	0	0	0	0	0	0	0	0	0	0
Bacteria/Proteobacteria/Alphaproteobacteria/Sphingomonadales/Sphingomonadaceae/Sphingoaurantiacus	0	0	0	0	0	0	0	0	0	0	0	0	0	0	0	0	0	0	0	0	0	0	0	0	0	0	0	0	0	0	0	0	0	0	0	0	0	0	0	0	0	0	0	0	0
Bacteria/Proteobacteria/Alphaproteobacteria/Sphingomonadales/Sphingomonadaceae/Sphingobium	0	0	0	0	0	0	0	0	0	0	0	0	0	0	0	0	0	0	0	0	0	0	0	0	0	0	0	0	0	0	0	0	0	0	0	0	0	0	0	0	0	0	0	0	0
Bacteria/Proteobacteria/Alphaproteobacteria/Sphingomonadales/Sphingomonadaceae/Sphingomicrobium	0	0	0	0	0	0	0	0	0	0	0	0	0	0	0	0	0	0	0	0	0	0	0	0	0	0	0	0	0	0	0	0	0	0	0	0	0	0	0	0	0	0	0	0	0
Bacteria/Proteobacteria/Alphaproteobacteria/Sphingomonadales/Sphingomonadaceae/Sphingomonas	0	0	0	0	0	0	0	0	0	0	0	0	0	0	0	0	0	0	0	0	0	0	0	0	0	0	0	0	0	0	0	0	0	0	0	0	0	0	0	0	0	0	0	0	0
Bacteria/Proteobacteria/Alphaproteobacteria/Sphingomonadales/Sphingomonadaceae/Sphingopyxis	0	0	0	0	0	0	0	0	0	0	0	0	0	0	0	0	0	0	0	0	0	0	0	0	0	0	0	0	0	0	0	0	0	0	0	0	0	0	0	0	0	0	0	0	0
Bacteria/Proteobacteria/Alphaproteobacteria/Sphingomonadales/Sphingomonadaceae/Sphingorhabdus	0	0	0	0	0	0	0	0	0	0	0	0	0	0	0	0	0	0	0	0	0	0	0	0	0	0	0	0	0	0	0	0	0	0	0	0	0	0	0	0	0	0	0	0	0
Bacteria/Proteobacteria/Alphaproteobacteria/Sphingomonadales/Sphingomonadaceae/uncultured	0	0	0	0	0	0	0	0	0	0	0	0	0	0	0	0	0	0	0	0	0	0	0	0	0	0	0	0	0	0	0	0	0	0	0	0	0	0	0	0	0	0	0	0	0
Bacteria/Proteobacteria/Alphaproteobacteria/Sphingomonadales/Sphingomonadaceae/Zymomonas	0	0	0	0	0	0	0	0	0	0	0	0	0	0	0	0	0	0	0	0	0	0	0	0	0	0	0	0	0	0	0	0	0	0	0	0	0	0	0	0	0	0	0	0	0
Bacteria/Proteobacteria/Alphaproteobacteria/Thalassobaculales/Nisaeaceae/Nisaea	0	0	0	0	0	0	0	0	0	0	0	0	0	0	0	0	0	0	0	0	0	0	0	0	0	0	0	0	0	0	0	0	0	0	0	0	0	0	0	0	0	0	0	0	0
Bacteria/Proteobacteria/Alphaproteobacteria/Thalassobaculales/Nisaeaceae/OM75 clade	0	0	0	0	0	0	0	0	0	0	0	0	0	0	0	0	0	0	0	0	0	0	0	0	0	0	0	0	0	0	0	0	0	0	0	0	0	0	0	0	0	0	0	0	0
Bacteria/Proteobacteria/Alphaproteobacteria/Thalassobaculales/Oceanibaculaceae/Oceanibaculum	0	0	0	0	0	0	0	0	0	0	0	0	0	0	0	0	0	0	0	0	0	0	0	0	0	0	0	0	0	0	0	0	0	0	0	0	0	0	0	0	0	0	0	0	0
Bacteria/Proteobacteria/Alphaproteobacteria/Thalassobaculales/Thalassobaculaceae/Candidatus Endolissoclinum	0	0	0	0	0	0	0	0	0	0	0	0	0	0	0	0	0	0	0	0	0	0	0	0	0	0	0	0	0	0	0	0	0	0	0	0	0	0	0	0	0	0	0	0	0
Bacteria/Proteobacteria/Alphaproteobacteria/Thalassobaculales/Thalassobaculaceae/Thalassobaculum	0	0	0	0	0	0	0	0	0	0	0	0	0	0	0	0	0	0	0	0	0	0	0	0	0	0	0	0	0	0	0	0	0	0	0	0	0	0	0	0	0	0	0	0	0
Bacteria/Proteobacteria/Alphaproteobacteria/Tistrellales/Geminicoccaceae/Candidatus Alysiosphaera	37	0	0	22	0	0	39	0	0	0	0	0	0	0	0	0	0	0	0	0	0	0	37	39	0	44	0	40	0	0	0	0	0	0	0	0	0	0	0	0	0	0	0	0	0
Bacteria/Proteobacteria/Alphaproteobacteria/Tistrellales/Geminicoccaceae/Geminicoccus	0	0	0	0	0	0	0	0	0	0	0	0	0	0	0	0	0	0	0	0	0	0	0	0	0	0	0	0	0	0	0	0	0	0	0	0	0	0	0	0	0	0	0	0	0
Bacteria/Proteobacteria/Alphaproteobacteria/Tistrellales/Geminicoccaceae/uncultured	0	0	0	0	0	0	0	0	0	0	0	0	0	0	0	0	0	0	0	0	0	0	0	0	0	0	0	0	0	0	0	0	0	0	0	0	0	0	0	0	0	0	0	0	0
Bacteria/Proteobacteria/Alphaproteobacteria/Tistrellales/Tistrellaceae/Tistrella	0	0	0	0	0	0	0	0	0	0	0	0	0	0	0	0	0	0	0	0	0	0	0	0	0	0	0	0	0	0	0	0	0	0	0	0	0	0	0	0	0	0	0	0	0
Bacteria/Proteobacteria/Deltaproteobacteria/Bdellovibrionales/Bacteriovoracaceae/Bacteriovorax	0	0	0	0	0	0	0	0	0	0	0	0	0	0	0	0	0	0	0	0	0	0	0	0	0	0	0	0	0	0	0	0	0	0	0	0	0	0	0	0	0	0	0	0	0
Bacteria/Proteobacteria/Deltaproteobacteria/Bdellovibrionales/Bacteriovoracaceae/Halobacteriovorax	0	0	0	0	0	0	0	0	0	0	0	0	0	0	0	0	0	0	0	0	0	0	0	0	0	0	0	0	0	0	0	0	0	0	0	0	0	0	0	0	0	0	0	0	0
Bacteria/Proteobacteria/Deltaproteobacteria/Bdellovibrionales/Bacteriovoracaceae/Peredibacter	25	11	19	0	17	0	17	0	0	0	0	16	19	0	19	0	0	0	0	26	0	0	13	0	16	16	20	0	0	14	0	0	0	0	0	0	14	13	18	0	0	0	0	0	0
Bacteria/Proteobacteria/Deltaproteobacteria/Bdellovibrionales/Bacteriovoracaceae/uncultured	0	0	0	0	0	0	0	12	0	0	0	0	15	0	0	16	0	0	0	0	0	0	0	0	0	0	0	0	0	16	0	20	0	0	0	0	0	0	0	0	0	0	13	0	0
Bacteria/Proteobacteria/Deltaproteobacteria/Bdellovibrionales/Bdellovibrionaceae/Bdellovibrio	24	26	0	0	0	19	21	0	19	0	0	25	41	22	24	24	0	19	0	30	0	16	31	19	0	0	21	30	22	23	22	28	0	18	20	0	32	0	28	22	0	23	0	19	19
Bacteria/Proteobacteria/Deltaproteobacteria/Bdellovibrionales/Bdellovibrionaceae/OM27 clade	49	23	22	18	33	18	50	37	38	38	30	28	41	29	19	42	38	16	48	57	39	14	0	24	15	0	33	27	0	21	14	21	15	46	18	30	18	20	23	26	21	29	33	28	44
Bacteria/Proteobacteria/Deltaproteobacteria/Bdellovibrionales/Bdellovibrionaceae/uncultured	0	0	0	0	0	0	0	0	0	0	0	0	0	0	0	0	0	0	0	0	0	0	0	0	0	0	0	0	0	0	0	0	0	0	0	0	0	0	0	0	0	0	0	0	0
Bacteria/Proteobacteria/Deltaproteobacteria/Bradymonadales/Bradymonadaceae/Bradymonas	0	0	0	0	0	0	0	0	0	0	0	0	0	0	0	0	0	0	0	0	0	0	0	0	0	0	0	0	0	0	0	0	0	0	0	0	0	0	0	0	0	0	0	0	0
Bacteria/Proteobacteria/Deltaproteobacteria/Deltaproteobacteria Incertae Sedis/Syntrophorhabdaceae/Syntrophorhabdus	0	0	0	0	0	0	0	0	0	0	0	0	0	0	0	0	0	0	0	0	0	0	0	0	0	0	0	0	0	0	0	0	0	0	0	0	0	0	0	0	0	0	0	0	0
Bacteria/Proteobacteria/Deltaproteobacteria/Deltaproteobacteria Incertae Sedis/Unknown Family/Deferrisoma	11	0	0	0	0	0	0	0	0	25	12	0	0	0	0	0	0	0	0	15	22	0	0	0	0	0	0	13	0	0	0	0	0	21	0	0	0	0	0	0	0	0	18	0	23
Bacteria/Proteobacteria/Deltaproteobacteria/Desulfarculales/Desulfarculaceae/Desulfarculus	0	0	0	0	0	0	0	0	0	0	0	0	0	0	0	0	0	0	0	0	0	0	0	0	0	0	0	0	0	0	0	0	0	0	0	0	0	0	0	0	0	0	0	0	0
Bacteria/Proteobacteria/Deltaproteobacteria/Desulfarculales/Desulfarculaceae/Desulfatiglans	300	176	184	82	85	75	144	83	141	103	110	127	160	190	277	62	82	43	123	141	233	123	161	145	182	182	209	111	56	89	78	55	70	180	160	173	96	146	115	50	75	147	191	174	170
Bacteria/Proteobacteria/Deltaproteobacteria/Desulfarculales/Desulfarculaceae/Desulfocarbo	0	0	0	0	0	0	0	0	0	0	0	0	0	0	0	0	0	0	0	0	0	0	0	0	0	0	0	0	0	0	0	0	0	0	0	0	0	0	0	0	0	0	0	0	0
Bacteria/Proteobacteria/Deltaproteobacteria/Desulfarculales/Desulfarculaceae/Dethiosulfatarculus	0	0	0	0	0	0	0	0	0	0	0	0	0	0	0	0	0	0	0	0	0	0	0	0	0	0	0	0	0	0	0	0	0	0	0	0	0	0	0	0	0	0	0	0	0
Bacteria/Proteobacteria/Deltaproteobacteria/Desulfarculales/Desulfarculaceae/uncultured	18	0	0	0	0	0	44	21	55	0	0	0	0	21	32	20	19	0	0	17	0	0	15	0	0	0	15	21	0	19	0	24	19	19	0	0	0	0	0	48	32	31	29	23	27
Bacteria/Proteobacteria/Deltaproteobacteria/Desulfobacterales/Desulfobacteraceae/Algorimarina	0	0	0	0	0	0	0	0	0	0	0	0	0	0	0	0	0	0	0	0	0	0	0	0	0	0	0	0	0	0	0	0	0	0	0	0	0	0	0	0	0	0	0	0	0
Bacteria/Proteobacteria/Deltaproteobacteria/Desulfobacterales/Desulfobacteraceae/Candidatus Desulfamplus	0	0	0	0	0	0	0	0	0	0	0	0	0	0	0	0	0	0	0	0	0	0	0	0	0	0	0	0	0	0	0	0	0	0	0	0	0	0	0	0	0	0	0	0	0
Bacteria/Proteobacteria/Deltaproteobacteria/Desulfobacterales/Desulfobacteraceae/Candidatus Magnetananas	42	0	12	0	0	0	14	0	0	0	0	0	0	14	12	0	0	0	0	0	0	12	11	0	12	16	12	20	0	21	0	0	0	17	12	0	0	0	21	0	0	0	0	0	16
Bacteria/Proteobacteria/Deltaproteobacteria/Desulfobacterales/Desulfobacteraceae/Candidatus Magnetoglobus	0	0	0	0	0	0	0	0	0	0	0	0	0	0	0	0	0	0	0	0	0	0	0	0	0	0	0	0	0	0	0	0	0	0	0	0	0	0	0	0	0	0	0	0	0
Bacteria/Proteobacteria/Deltaproteobacteria/Desulfobacterales/Desulfobacteraceae/Candidatus Magnetomorum	0	0	0	0	0	0	0	0	0	0	0	0	0	0	0	0	0	0	0	0	0	0	0	0	0	0	0	0	0	0	0	0	0	0	0	0	0	0	0	0	0	0	0	0	0
Bacteria/Proteobacteria/Deltaproteobacteria/Desulfobacterales/Desulfobacteraceae/Desulfatibacillum	0	0	0	0	0	0	0	0	0	0	0	0	0	0	0	0	0	0	0	0	0	0	0	0	0	0	0	0	0	0	0	0	0	0	0	0	0	0	0	0	0	0	0	0	0
Bacteria/Proteobacteria/Deltaproteobacteria/Desulfobacterales/Desulfobacteraceae/Desulfatiferula	34	0	0	0	18	0	0	0	0	0	0	0	23	0	20	0	0	0	0	0	0	16	14	26	0	0	0	0	0	0	0	0	0	0	0	0	0	0	17	0	0	0	0	0	0
Bacteria/Proteobacteria/Deltaproteobacteria/Desulfobacterales/Desulfobacteraceae/Desulfatirhabdium	0	0	0	0	0	0	0	0	0	0	0	0	0	0	0	0	0	0	0	0	0	0	0	0	0	0	0	0	0	0	0	0	0	0	0	0	0	0	0	0	0	0	0	0	0
Bacteria/Proteobacteria/Deltaproteobacteria/Desulfobacterales/Desulfobacteraceae/Desulfatitalea	0	0	0	0	0	0	0	0	0	0	0	0	0	0	0	0	0	0	0	0	0	0	0	0	0	0	0	0	0	0	0	0	0	0	0	0	0	0	0	0	0	0	0	0	0
Bacteria/Proteobacteria/Deltaproteobacteria/Desulfobacterales/Desulfobacteraceae/Desulfobacter	18	0	0	0	0	0	0	0	0	0	0	0	0	0	0	0	0	0	0	0	0	0	0	0	0	0	21	0	0	0	0	0	0	0	0	0	0	0	0	0	0	0	0	0	0
Bacteria/Proteobacteria/Deltaproteobacteria/Desulfobacterales/Desulfobacteraceae/Desulfobacterium	60	29	44	0	0	0	0	0	0	0	0	0	82	0	85	0	0	0	0	0	22	44	28	19	34	60	30	0	0	0	0	0	0	0	0	0	0	22	0	0	0	0	0	0	0
Bacteria/Proteobacteria/Deltaproteobacteria/Desulfobacterales/Desulfobacteraceae/Desulfobacula	0	0	0	0	0	0	0	0	0	0	0	0	0	0	0	0	0	0	0	0	0	0	33	0	0	0	0	0	0	0	0	0	0	0	0	0	0	0	0	0	0	0	0	0	0
Bacteria/Proteobacteria/Deltaproteobacteria/Desulfobacterales/Desulfobacteraceae/Desulfobotulus	0	0	0	0	0	0	0	0	0	0	0	0	0	0	0	0	0	0	0	0	0	0	0	0	0	0	0	0	0	0	0	0	0	0	0	0	0	0	0	0	0	0	0	0	0
Bacteria/Proteobacteria/Deltaproteobacteria/Desulfobacterales/Desulfobacteraceae/Desulfocella	0	0	0	0	0	0	0	0	0	0	0	0	0	0	0	0	0	0	0	0	0	0	0	0	0	0	0	0	0	0	0	0	0	0	0	0	0	0	0	0	0	0	0	0	0
Bacteria/Proteobacteria/Deltaproteobacteria/Desulfobacterales/Desulfobacteraceae/Desulfococcus	45	0	0	0	0	0	0	0	0	22	0	24	21	0	18	0	0	0	0	21	20	0	31	24	17	0	34	0	0	0	0	0	0	19	0	0	0	0	26	0	0	0	19	0	31
Bacteria/Proteobacteria/Deltaproteobacteria/Desulfobacterales/Desulfobacteraceae/Desulfoconvexum	145	117	93	0	0	21	0	0	0	0	0	0	152	56	162	0	0	0	23	24	47	87	77	78	80	89	93	24	0	0	0	0	0	0	0	0	0	0	0	0	0	27	0	0	0
Bacteria/Proteobacteria/Deltaproteobacteria/Desulfobacterales/Desulfobacteraceae/Desulfofaba	0	0	0	0	0	0	0	0	0	0	0	0	0	0	0	0	0	0	0	0	0	0	0	0	0	0	0	0	0	0	0	0	0	0	0	0	0	0	0	0	0	0	0	0	0
Bacteria/Proteobacteria/Deltaproteobacteria/Desulfobacterales/Desulfobacteraceae/Desulfofrigus	0	0	0	0	0	0	0	0	0	0	0	0	18	0	18	0	0	0	0	0	0	0	0	0	0	0	0	0	0	0	0	0	0	0	0	0	0	0	0	0	0	0	0	0	0
Bacteria/Proteobacteria/Deltaproteobacteria/Desulfobacterales/Desulfobacteraceae/Desulfoluna	0	0	0	0	0	0	0	0	0	0	0	0	0	0	0	0	0	0	0	0	0	0	0	0	0	0	0	0	0	0	0	0	0	0	0	0	0	0	0	0	0	0	0	0	0
Bacteria/Proteobacteria/Deltaproteobacteria/Desulfobacterales/Desulfobacteraceae/Desulfonatronobacter	0	0	0	0	0	0	0	0	0	0	0	0	0	0	0	0	0	0	0	0	0	0	0	0	0	0	0	0	0	0	0	0	0	0	0	0	0	0	0	0	0	0	0	0	0
Bacteria/Proteobacteria/Deltaproteobacteria/Desulfobacterales/Desulfobacteraceae/Desulfonema	227	0	131	0	0	0	0	0	0	131	120	0	217	165	227	107	0	0	165	179	197	139	108	116	129	181	132	0	0	0	0	0	0	0	0	0	0	0	117	0	0	0	0	0	0
Bacteria/Proteobacteria/Deltaproteobacteria/Desulfobacterales/Desulfobacteraceae/Desulforegula	0	0	0	0	0	0	0	0	0	0	0	0	0	0	0	0	0	0	0	0	0	0	0	0	0	0	0	0	0	0	0	0	0	0	0	0	0	0	0	0	0	0	0	0	0
Bacteria/Proteobacteria/Deltaproteobacteria/Desulfobacterales/Desulfobacteraceae/Desulfosalsimonas	0	0	0	0	0	0	0	0	0	0	0	0	0	0	0	0	0	0	0	0	0	0	0	0	0	0	0	0	0	0	0	0	0	0	0	0	0	0	0	0	0	0	0	0	0
Bacteria/Proteobacteria/Deltaproteobacteria/Desulfobacterales/Desulfobacteraceae/Desulfosarcina	60	28	31	0	0	0	0	35	0	36	35	39	0	44	39	0	0	0	45	47	52	0	39	0	39	44	41	0	0	0	0	0	0	49	0	0	0	0	0	0	0	0	0	32	37
Bacteria/Proteobacteria/Deltaproteobacteria/Desulfobacterales/Desulfobacteraceae/Desulfospira	0	0	0	0	0	0	0	0	0	0	0	0	0	0	0	0	0	0	0	0	0	0	0	0	0	0	0	0	0	0	0	0	0	0	0	0	0	0	0	0	0	0	0	0	0
Bacteria/Proteobacteria/Deltaproteobacteria/Desulfobacterales/Desulfobacteraceae/Desulfotignum	0	0	0	0	0	0	0	0	0	0	0	0	0	0	0	0	0	0	0	0	0	0	0	0	0	0	0	0	0	0	0	0	0	0	0	0	0	0	0	0	0	0	0	0	0
Bacteria/Proteobacteria/Deltaproteobacteria/Desulfobacterales/Desulfobacteraceae/SEEP-SRB1	515	226	180	159	121	207	397	224	282	256	347	329	261	214	321	271	251	183	314	283	421	189	246	236	222	196	236	249	182	171	240	162	159	337	354	274	288	352	328	191	227	398	379	428	349
Bacteria/Proteobacteria/Deltaproteobacteria/Desulfobacterales/Desulfobacteraceae/Sva0081 sediment group	383	179	169	176	218	198	421	228	330	218	182	223	351	355	327	187	177	95	208	279	255	194	265	230	224	232	250	350	190	292	226	224	172	357	285	331	302	310	325	184	196	199	239	252	275
Bacteria/Proteobacteria/Deltaproteobacteria/Desulfobacterales/Desulfobacteraceae/uncultured	854	522	476	263	217	299	379	210	272	216	241	218	579	450	577	169	162	125	385	389	455	328	460	421	358	521	514	287	161	248	127	91	83	197	224	260	228	288	280	102	175	219	264	260	225
Bacteria/Proteobacteria/Deltaproteobacteria/Desulfobacterales/Desulfobulbaceae/[Desulfobacterium] catecholicum group	208	96	116	0	0	0	0	48	0	0	0	0	275	185	290	0	0	0	0	52	84	136	165	94	120	163	152	110	0	50	0	0	0	0	0	0	95	73	55	0	0	0	0	0	0
Bacteria/Proteobacteria/Deltaproteobacteria/Desulfobacterales/Desulfobulbaceae/Candidatus Electronema	0	0	0	0	0	0	0	0	0	0	0	0	0	0	0	0	0	0	0	0	0	0	0	0	0	0	0	0	0	0	0	0	0	0	0	0	0	0	0	0	0	0	0	0	0
Bacteria/Proteobacteria/Deltaproteobacteria/Desulfobacterales/Desulfobulbaceae/Candidatus Electrothrix	0	0	0	0	0	0	0	0	0	0	0	0	25	0	21	0	0	0	0	20	0	23	33	38	0	0	0	26	17	24	0	0	0	0	0	0	33	75	59	0	0	0	0	0	0
Bacteria/Proteobacteria/Deltaproteobacteria/Desulfobacterales/Desulfobulbaceae/Desulfobulbus	0	0	0	0	0	0	0	0	0	0	0	0	0	0	0	0	0	0	0	0	0	0	0	0	0	0	0	0	0	0	0	0	0	0	0	0	0	0	0	0	0	0	0	0	0
Bacteria/Proteobacteria/Deltaproteobacteria/Desulfobacterales/Desulfobulbaceae/Desulfocapsa	0	36	0	0	0	0	0	0	32	0	0	0	0	40	0	0	30	0	0	0	0	0	0	0	0	0	0	0	0	0	0	0	0	0	0	0	0	0	0	0	0	0	0	0	0
Bacteria/Proteobacteria/Deltaproteobacteria/Desulfobacterales/Desulfobulbaceae/Desulfofustis	0	0	0	0	0	0	0	0	0	0	0	0	0	0	0	0	0	0	0	0	0	0	0	0	0	0	0	0	0	0	0	0	0	0	0	0	0	0	0	0	0	0	0	0	0
Bacteria/Proteobacteria/Deltaproteobacteria/Desulfobacterales/Desulfobulbaceae/Desulfopila	51	0	0	0	0	0	0	0	0	33	35	30	38	0	42	0	0	0	60	103	47	35	36	28	30	27	0	0	0	27	0	0	0	0	0	0	0	0	0	0	0	0	0	0	0
Bacteria/Proteobacteria/Deltaproteobacteria/Desulfobacterales/Desulfobulbaceae/Desulfoprunum	0	0	0	0	0	0	0	0	0	0	0	0	0	0	0	0	0	0	0	0	0	0	0	0	0	0	0	0	0	0	0	0	0	0	0	0	0	0	0	0	0	0	0	0	0
Bacteria/Proteobacteria/Deltaproteobacteria/Desulfobacterales/Desulfobulbaceae/Desulforhopalus	52	0	25	0	0	0	0	0	0	0	0	0	53	0	63	0	0	0	23	0	20	48	37	32	66	45	67	19	0	0	0	0	0	0	0	0	28	0	0	0	0	0	0	0	0
Bacteria/Proteobacteria/Deltaproteobacteria/Desulfobacterales/Desulfobulbaceae/Desulfotalea	64	49	32	0	0	0	0	0	0	0	0	0	128	75	127	0	0	0	35	35	28	43	52	52	0	35	43	20	0	0	0	0	0	0	0	0	19	24	0	0	0	0	0	0	0
Bacteria/Proteobacteria/Deltaproteobacteria/Desulfobacterales/Desulfobulbaceae/Desulfurivibrio	0	0	0	0	0	0	0	0	0	0	0	0	0	0	0	0	0	0	0	0	0	0	0	0	0	0	0	0	0	0	0	0	0	0	0	0	0	0	0	0	0	0	0	0	0
Bacteria/Proteobacteria/Deltaproteobacteria/Desulfobacterales/Desulfobulbaceae/Dissulfuribacter	0	0	0	0	0	0	0	0	0	0	0	0	0	0	0	0	0	0	0	0	0	0	0	0	0	0	0	0	0	0	0	0	0	0	0	0	0	0	0	0	0	0	0	0	0
Bacteria/Proteobacteria/Deltaproteobacteria/Desulfobacterales/Desulfobulbaceae/Dissulfurimicrobium	0	0	0	0	0	0	0	0	0	0	0	0	0	0	0	0	0	0	0	0	0	0	0	0	0	0	0	0	0	0	0	0	0	0	0	0	0	0	0	0	0	0	0	0	0
Bacteria/Proteobacteria/Deltaproteobacteria/Desulfobacterales/Desulfobulbaceae/Dissulfurirhabdus	0	0	0	0	0	0	0	0	0	0	0	0	0	0	0	0	0	0	0	0	0	0	0	0	0	0	0	0	0	0	0	0	0	0	0	0	0	0	0	0	0	0	0	0	0
Bacteria/Proteobacteria/Deltaproteobacteria/Desulfobacterales/Desulfobulbaceae/MSBL7	0	0	0	0	0	0	0	0	0	0	0	0	0	0	0	0	0	0	0	0	0	0	0	0	0	0	0	0	0	0	0	0	0	0	0	0	0	0	0	0	0	0	0	0	0
Bacteria/Proteobacteria/Deltaproteobacteria/Desulfobacterales/Desulfobulbaceae/SEEP-SRB2	0	0	0	0	0	0	0	0	0	0	0	0	0	0	0	0	0	0	0	0	0	0	0	0	0	0	0	0	0	0	0	0	0	0	0	0	0	0	0	0	0	0	0	0	0
Bacteria/Proteobacteria/Deltaproteobacteria/Desulfobacterales/Desulfobulbaceae/SEEP-SRB4	0	0	0	0	0	0	0	0	0	0	0	0	0	0	49	0	0	0	0	0	0	0	0	0	0	0	0	0	0	0	0	0	0	0	0	0	0	0	0	0	0	0	0	0	0
Bacteria/Proteobacteria/Deltaproteobacteria/Desulfobacterales/Desulfobulbaceae/uncultured	382	200	231	390	353	396	658	463	512	455	370	384	644	584	655	328	410	193	448	488	586	292	401	404	249	426	460	525	259	449	262	276	238	459	382	420	527	555	566	261	290	273	496	472	555
Bacteria/Proteobacteria/Deltaproteobacteria/Desulfofervidales/Desulfofervidaceae/Candidatus Desulfofervidus	0	0	0	0	0	0	0	0	0	0	0	0	0	0	0	0	0	0	0	0	0	0	0	0	0	0	0	0	0	0	0	0	0	0	0	0	0	0	0	0	0	0	0	0	0
Bacteria/Proteobacteria/Deltaproteobacteria/Desulfovibrionales/Desulfohalobiaceae/Desulfohalobium	0	0	0	0	0	0	0	0	0	0	0	0	0	0	0	0	0	0	0	0	0	0	0	0	0	0	0	0	0	0	0	0	0	0	0	0	0	0	0	0	0	0	0	0	0
Bacteria/Proteobacteria/Deltaproteobacteria/Desulfovibrionales/Desulfohalobiaceae/Desulfonatronospira	0	0	0	0	0	0	0	0	0	0	0	0	0	0	0	0	0	0	0	0	0	0	0	0	0	0	0	0	0	0	0	0	0	0	0	0	0	0	0	0	0	0	0	0	0
Bacteria/Proteobacteria/Deltaproteobacteria/Desulfovibrionales/Desulfohalobiaceae/Desulfonatronovibrio	0	0	0	0	0	0	0	0	0	0	0	0	0	0	0	0	0	0	0	0	0	0	0	0	0	0	0	0	0	0	0	0	0	0	0	0	0	0	0	0	0	0	0	0	0
Bacteria/Proteobacteria/Deltaproteobacteria/Desulfovibrionales/Desulfohalobiaceae/Desulfonauticus	0	0	0	0	0	0	0	0	0	0	0	0	0	0	0	0	0	0	0	0	0	0	0	0	0	0	0	0	0	0	0	0	0	0	0	0	0	0	0	0	0	0	0	0	0
Bacteria/Proteobacteria/Deltaproteobacteria/Desulfovibrionales/Desulfohalobiaceae/Desulfothermus	0	0	0	0	0	0	0	0	0	0	0	0	0	0	0	0	0	0	0	0	0	0	0	0	0	0	0	0	0	0	0	0	0	0	0	0	0	0	0	0	0	0	0	0	0
Bacteria/Proteobacteria/Deltaproteobacteria/Desulfovibrionales/Desulfohalobiaceae/Desulfovermiculus	0	0	0	0	0	0	0	0	0	0	0	0	0	0	0	0	0	0	0	0	0	0	0	0	0	0	0	0	0	0	0	0	0	0	0	0	0	0	0	0	0	0	0	0	0
Bacteria/Proteobacteria/Deltaproteobacteria/Desulfovibrionales/Desulfohalobiaceae/uncultured	0	0	0	0	0	0	0	0	0	0	0	0	0	0	0	0	0	0	0	0	0	0	0	0	0	0	0	0	0	0	0	0	0	0	0	0	0	0	0	0	0	0	0	0	0
Bacteria/Proteobacteria/Deltaproteobacteria/Desulfovibrionales/Desulfomicrobiaceae/Desulfomicrobium	0	0	0	0	0	0	0	0	0	0	0	0	0	0	0	0	0	0	0	0	0	0	0	0	0	0	0	0	0	0	0	0	0	0	0	0	0	0	0	0	0	0	0	0	0
Bacteria/Proteobacteria/Deltaproteobacteria/Desulfovibrionales/Desulfomicrobiaceae/Desulfoplanes	0	0	0	0	0	0	0	0	0	0	0	0	0	0	0	0	0	0	0	0	0	0	0	0	0	0	0	0	0	0	0	0	0	0	0	0	0	0	0	0	0	0	0	0	0
Bacteria/Proteobacteria/Deltaproteobacteria/Desulfovibrionales/Desulfonatronaceae/Desulfonatronum	0	0	0	0	0	0	0	0	0	0	0	0	0	0	0	0	0	0	0	0	0	0	0	0	0	0	0	0	0	0	0	0	0	0	0	0	0	0	0	0	0	0	0	0	0
Bacteria/Proteobacteria/Deltaproteobacteria/Desulfovibrionales/Desulfovibrionaceae/Bilophila	0	0	0	0	0	0	0	0	0	0	0	0	0	0	0	0	0	0	0	0	0	0	0	0	0	0	0	0	0	0	0	0	0	0	0	0	0	0	0	0	0	0	0	0	0
Bacteria/Proteobacteria/Deltaproteobacteria/Desulfovibrionales/Desulfovibrionaceae/Desulfobaculum	0	0	0	0	0	0	0	0	0	0	0	0	0	0	0	0	0	0	0	0	0	0	0	0	0	0	0	0	0	0	0	0	0	0	0	0	0	0	0	0	0	0	0	0	0
Bacteria/Proteobacteria/Deltaproteobacteria/Desulfovibrionales/Desulfovibrionaceae/Desulfocurvus	0	0	0	0	0	0	0	0	0	0	0	0	0	0	0	0	0	0	0	0	0	0	0	0	0	0	0	0	0	0	0	0	0	0	0	0	0	0	0	0	0	0	0	0	0
Bacteria/Proteobacteria/Deltaproteobacteria/Desulfovibrionales/Desulfovibrionaceae/Desulfovibrio	0	0	0	0	0	0	0	0	0	0	0	0	0	0	0	0	0	0	16	0	0	0	0	0	0	0	0	0	0	0	0	0	0	0	0	0	0	0	0	0	0	0	0	0	0
Bacteria/Proteobacteria/Deltaproteobacteria/Desulfovibrionales/Desulfovibrionaceae/Halodesulfovibrio	0	0	0	0	0	0	0	0	0	0	0	0	0	0	0	0	0	0	0	0	0	0	0	0	0	0	0	0	0	0	0	0	0	0	0	0	0	0	0	0	0	0	0	0	0
Bacteria/Proteobacteria/Deltaproteobacteria/Desulfovibrionales/Desulfovibrionaceae/Lawsonia	0	0	0	0	0	0	0	0	0	0	0	0	0	0	0	0	0	0	0	0	0	0	0	0	0	0	0	0	0	0	0	0	0	0	0	0	0	0	0	0	0	0	0	0	0
Bacteria/Proteobacteria/Deltaproteobacteria/Desulfovibrionales/Desulfovibrionaceae/Mailhella	0	0	0	0	0	0	0	0	0	0	0	0	0	0	0	0	0	0	0	0	0	0	0	0	0	0	0	0	0	0	0	0	0	0	0	0	0	0	0	0	0	0	0	0	0
Bacteria/Proteobacteria/Deltaproteobacteria/Desulfovibrionales/Desulfovibrionaceae/uncultured	0	0	0	0	0	0	0	0	0	0	0	0	0	0	0	0	0	0	0	0	0	0	0	0	0	0	0	0	0	0	0	0	0	0	0	0	0	0	0	0	0	0	0	0	0
Bacteria/Proteobacteria/Deltaproteobacteria/Desulfuromonadales/Desulfuromonadaceae/Desulfuromonas	0	0	0	0	0	0	174	0	0	95	0	0	82	0	85	0	0	0	164	0	119	0	0	0	0	0	0	0	0	0	0	0	0	0	0	0	0	0	0	0	0	0	0	0	0
Bacteria/Proteobacteria/Deltaproteobacteria/Desulfuromonadales/Desulfuromonadaceae/Desulfuromusa	43	0	0	0	0	0	0	0	0	0	0	0	0	0	0	0	0	0	0	0	0	0	0	0	0	0	0	0	0	0	0	0	0	0	0	0	0	0	0	0	0	0	0	0	0
Bacteria/Proteobacteria/Deltaproteobacteria/Desulfuromonadales/Desulfuromonadaceae/Malonomonas	0	0	0	0	0	0	0	0	0	0	0	0	0	0	0	0	0	0	0	0	0	0	0	0	0	0	0	0	0	0	0	0	0	0	0	0	0	0	0	0	0	0	0	0	0
Bacteria/Proteobacteria/Deltaproteobacteria/Desulfuromonadales/Desulfuromonadaceae/Pelobacter	0	0	0	0	0	0	0	0	0	0	0	0	115	0	0	0	0	0	0	0	0	0	0	0	0	0	0	0	0	0	0	0	0	0	0	0	0	0	0	0	0	0	0	0	0
Bacteria/Proteobacteria/Deltaproteobacteria/Desulfuromonadales/Geobacteraceae/Geoalkalibacter	0	0	0	0	0	0	0	0	0	0	0	0	0	0	0	0	0	0	0	0	0	0	0	0	0	0	0	0	0	0	0	0	0	0	0	0	0	0	0	0	0	0	0	0	0
Bacteria/Proteobacteria/Deltaproteobacteria/Desulfuromonadales/Geobacteraceae/Geobacter	161	0	55	0	0	0	116	0	0	0	119	0	120	230	146	0	0	0	90	118	0	0	0	0	0	0	0	0	0	0	0	0	0	0	0	0	0	0	0	0	0	0	0	0	0
Bacteria/Proteobacteria/Deltaproteobacteria/Desulfuromonadales/Geobacteraceae/Geopsychrobacter	72	0	47	0	0	0	0	0	0	0	0	0	73	55	77	0	0	0	0	0	0	0	0	0	0	0	0	0	0	0	0	0	0	0	0	0	0	0	0	0	0	0	0	0	0
Bacteria/Proteobacteria/Deltaproteobacteria/Desulfuromonadales/Geobacteraceae/Geothermobacter	0	0	0	0	0	0	0	0	0	0	0	0	0	0	0	0	0	0	60	0	0	0	0	0	0	0	0	0	0	0	0	0	0	0	0	0	0	0	0	0	0	0	0	0	0
Bacteria/Proteobacteria/Deltaproteobacteria/Myxococcales/Archangiaceae/Anaeromyxobacter	0	0	0	0	0	0	0	0	0	0	0	0	0	0	0	0	0	0	0	0	0	0	0	0	0	0	0	0	0	0	0	0	0	0	0	0	0	0	0	0	0	0	0	0	0
Bacteria/Proteobacteria/Deltaproteobacteria/Myxococcales/Archangiaceae/Archangium	0	0	0	0	0	0	0	0	0	0	0	0	0	0	0	0	0	0	0	0	0	0	0	0	0	0	0	0	0	0	0	0	0	0	0	0	0	0	0	0	0	0	0	0	0
Bacteria/Proteobacteria/Deltaproteobacteria/Myxococcales/Archangiaceae/Cystobacter	0	0	0	0	0	0	0	0	0	0	0	0	0	0	0	0	0	0	0	0	0	0	0	0	0	0	0	0	0	0	0	0	0	0	0	0	0	0	0	0	0	0	0	0	0
Bacteria/Proteobacteria/Deltaproteobacteria/Myxococcales/Archangiaceae/Stigmatella	0	0	0	0	0	0	0	0	0	0	0	0	0	0	0	0	0	0	0	0	0	0	0	0	0	0	0	0	0	0	0	0	0	0	0	0	0	0	0	0	0	0	0	0	0
Bacteria/Proteobacteria/Deltaproteobacteria/Myxococcales/Archangiaceae/uncultured	0	0	0	0	0	0	0	0	0	0	0	0	0	0	0	0	0	0	0	0	0	0	0	0	0	0	0	0	0	0	0	0	0	0	0	0	0	0	0	0	0	0	0	0	0
Bacteria/Proteobacteria/Deltaproteobacteria/Myxococcales/Haliangiaceae/Haliangium	106	40	48	35	48	43	97	71	59	66	43	43	53	70	62	54	50	37	57	53	70	35	53	47	72	57	65	65	60	79	59	69	60	79	67	57	76	90	88	96	92	82	70	109	111
Bacteria/Proteobacteria/Deltaproteobacteria/Myxococcales/Myxococcaceae/Aggregicoccus	0	0	0	0	0	0	0	0	0	0	0	0	0	0	0	0	0	0	0	0	0	0	0	0	0	0	0	0	0	0	0	0	0	0	0	0	0	0	0	0	0	0	0	0	0
Bacteria/Proteobacteria/Deltaproteobacteria/Myxococcales/Myxococcaceae/Corallococcus	0	0	0	0	0	0	0	0	0	0	0	0	0	0	0	0	0	0	0	0	0	0	0	0	0	0	0	0	0	0	0	0	0	0	0	0	0	0	0	0	0	0	0	0	0
Bacteria/Proteobacteria/Deltaproteobacteria/Myxococcales/Myxococcaceae/Myxococcus	0	0	0	0	0	0	0	0	0	0	0	0	0	0	0	0	0	0	0	0	0	0	0	0	0	0	0	0	0	0	0	0	0	0	0	0	0	0	0	0	0	0	0	0	0
Bacteria/Proteobacteria/Deltaproteobacteria/Myxococcales/Myxococcaceae/uncultured	0	0	0	0	0	0	0	0	0	0	0	0	0	0	0	0	0	0	0	0	0	0	0	0	0	0	0	0	0	0	0	0	0	0	0	0	0	0	0	0	0	0	0	0	0
Bacteria/Proteobacteria/Deltaproteobacteria/Myxococcales/Nannocystaceae/Enhygromyxa	0	0	0	0	0	0	0	0	0	0	0	0	0	0	0	0	0	0	0	0	0	0	0	0	0	0	0	0	0	0	0	0	0	0	0	0	0	0	0	0	0	0	0	0	0
Bacteria/Proteobacteria/Deltaproteobacteria/Myxococcales/Nannocystaceae/Nannocystis	0	0	0	0	0	0	0	0	0	0	0	0	0	0	0	0	0	0	0	0	0	0	0	0	0	0	0	0	0	0	0	0	0	0	0	0	0	0	0	0	0	0	0	0	0
Bacteria/Proteobacteria/Deltaproteobacteria/Myxococcales/Nannocystaceae/Plesiocystis	0	0	0	0	0	0	0	0	0	0	0	0	0	0	0	0	0	0	0	0	0	0	0	0	0	0	0	0	0	0	0	0	0	0	0	0	0	0	0	0	0	0	0	0	0
Bacteria/Proteobacteria/Deltaproteobacteria/Myxococcales/Nannocystaceae/Pseudenhygromyxa	0	0	0	0	0	0	0	0	0	0	0	0	0	0	0	0	0	0	0	0	0	0	0	0	0	0	0	0	0	0	0	0	0	0	0	0	0	0	0	0	0	0	0	0	0
Bacteria/Proteobacteria/Deltaproteobacteria/Myxococcales/Nannocystaceae/uncultured	18	0	0	0	0	0	0	0	0	0	0	0	0	0	0	0	0	0	0	0	0	0	0	0	0	0	0	0	0	0	0	19	0	17	26	0	0	0	16	24	0	0	0	18	21
Bacteria/Proteobacteria/Deltaproteobacteria/Myxococcales/Phaselicystidaceae/Phaselicystis	30	0	0	0	0	0	0	0	0	0	0	0	0	0	0	0	0	0	22	0	0	21	0	0	0	0	0	0	0	0	0	0	0	25	0	0	0	0	0	0	0	0	0	0	0
Bacteria/Proteobacteria/Deltaproteobacteria/Myxococcales/Polyangiaceae/Aetherobacter	0	0	0	0	0	0	0	0	0	0	0	0	0	0	0	0	0	0	0	0	0	0	0	0	0	0	0	0	0	0	0	0	0	0	0	0	0	0	0	0	0	0	0	0	0
Bacteria/Proteobacteria/Deltaproteobacteria/Myxococcales/Polyangiaceae/Chondromyces	0	0	0	0	0	0	0	0	0	0	0	0	0	0	0	0	0	0	0	0	0	0	0	0	0	0	0	0	0	0	0	0	0	0	0	0	0	0	0	0	0	0	0	0	0
Bacteria/Proteobacteria/Deltaproteobacteria/Myxococcales/Polyangiaceae/Jahnella	0	0	0	0	0	0	0	0	0	0	0	0	0	0	0	0	0	0	0	0	0	0	0	0	0	0	0	0	0	0	0	0	0	0	0	0	0	0	0	0	0	0	0	0	0
Bacteria/Proteobacteria/Deltaproteobacteria/Myxococcales/Polyangiaceae/Labilithrix	0	0	0	0	0	0	0	0	0	0	0	0	0	0	0	0	0	0	0	0	0	0	0	0	0	0	0	0	0	0	0	0	0	0	0	0	0	0	0	0	0	0	0	0	0
Bacteria/Proteobacteria/Deltaproteobacteria/Myxococcales/Polyangiaceae/Minicystis	0	0	0	0	0	0	0	0	0	0	0	0	0	0	0	0	0	0	0	0	0	0	0	0	0	0	0	0	0	0	0	0	0	0	0	0	0	0	0	0	0	0	0	0	0
Bacteria/Proteobacteria/Deltaproteobacteria/Myxococcales/Polyangiaceae/Pajaroellobacter	0	0	0	0	0	0	0	0	0	0	0	0	0	0	0	0	0	0	0	0	0	0	0	0	0	0	0	0	0	0	0	0	0	24	0	0	0	0	0	0	0	0	0	0	0
Bacteria/Proteobacteria/Deltaproteobacteria/Myxococcales/Polyangiaceae/Polyangium	0	0	0	0	0	0	0	0	0	0	0	0	0	0	0	0	0	0	0	0	0	0	0	0	0	0	0	0	0	0	0	0	0	0	0	0	0	0	0	0	0	0	0	0	0
Bacteria/Proteobacteria/Deltaproteobacteria/Myxococcales/Polyangiaceae/Sorangium	0	0	0	0	0	0	0	0	0	0	0	0	0	0	0	0	0	0	0	0	0	0	0	0	0	0	0	0	0	0	0	0	0	0	0	0	0	0	0	0	0	0	0	0	0
Bacteria/Proteobacteria/Deltaproteobacteria/Myxococcales/Polyangiaceae/uncultured	0	0	0	0	0	0	0	0	0	0	0	0	0	0	0	0	0	0	0	0	0	0	0	0	0	0	0	0	0	0	0	0	0	0	0	0	0	0	0	0	0	0	0	0	0
Bacteria/Proteobacteria/Deltaproteobacteria/Myxococcales/Sandaracinaceae/Sandaracinus	0	0	0	0	0	0	0	0	0	0	0	0	0	0	0	0	0	0	0	0	0	0	0	0	0	0	0	0	0	0	0	0	0	0	0	0	0	0	0	0	0	0	0	0	0
Bacteria/Proteobacteria/Deltaproteobacteria/Myxococcales/Sandaracinaceae/uncultured	89	35	30	35	20	25	61	55	51	35	21	26	40	39	45	61	73	52	43	42	47	26	33	48	48	62	37	76	29	49	40	49	45	63	61	63	45	36	31	80	46	33	51	61	42
Bacteria/Proteobacteria/Deltaproteobacteria/Myxococcales/Vulgatibacteraceae/Vulgatibacter	0	0	0	0	0	0	0	0	0	0	0	0	0	0	0	0	0	0	0	0	0	0	0	0	0	0	0	0	0	0	0	0	0	0	0	0	0	0	0	0	0	0	0	0	0
Bacteria/Proteobacteria/Deltaproteobacteria/Oligoflexales/Oligoflexaceae/Candidatus Turbabacter	0	0	0	0	0	0	0	0	0	0	0	0	0	0	0	0	0	0	0	0	0	0	0	0	0	0	0	0	0	0	0	0	0	0	0	0	0	0	0	0	0	0	0	0	0
Bacteria/Proteobacteria/Deltaproteobacteria/Oligoflexales/Oligoflexaceae/Oligoflexus	0	0	0	0	0	0	0	0	0	0	0	0	0	0	0	0	0	0	0	0	0	0	0	0	0	0	0	0	0	0	0	0	0	0	0	0	0	0	0	0	0	0	0	0	0
Bacteria/Proteobacteria/Deltaproteobacteria/Oligoflexales/Oligoflexaceae/Pseudobacteriovorax	0	0	0	0	0	0	0	0	0	0	0	0	0	0	0	0	0	0	0	0	0	0	0	0	0	0	0	0	0	0	0	0	0	0	0	0	0	0	0	0	0	0	0	0	0
Bacteria/Proteobacteria/Deltaproteobacteria/Oligoflexales/Oligoflexaceae/Silvanigrella	0	0	0	0	0	0	0	0	0	0	0	0	0	0	0	0	0	0	0	0	0	0	0	0	0	0	0	0	0	0	0	0	0	0	0	0	0	0	0	0	0	0	0	0	0
Bacteria/Proteobacteria/Deltaproteobacteria/Oligoflexales/Oligoflexaceae/uncultured	26	0	28	13	0	12	0	0	0	12	0	0	24	0	27	0	17	0	0	12	14	16	16	17	18	18	27	17	0	15	0	0	11	0	16	11	0	18	0	0	0	0	13	0	0
Bacteria/Proteobacteria/Deltaproteobacteria/Syntrophobacterales/Syntrophaceae/Desulfobacca	16	0	0	0	0	24	14	0	0	0	0	0	0	17	0	0	17	0	0	14	0	15	0	12	0	14	22	19	0	14	0	0	0	0	0	14	13	14	19	0	15	0	14	0	0
Bacteria/Proteobacteria/Deltaproteobacteria/Syntrophobacterales/Syntrophaceae/Desulfomonile	0	0	0	0	0	0	0	0	0	0	0	0	0	0	0	0	0	0	0	0	0	0	0	0	0	0	0	0	0	0	0	0	0	0	0	0	0	0	0	0	0	0	0	0	0
Bacteria/Proteobacteria/Deltaproteobacteria/Syntrophobacterales/Syntrophaceae/Smithella	0	0	0	0	0	0	0	0	0	0	0	0	0	0	0	0	0	0	0	0	0	0	0	0	0	0	0	0	0	0	0	0	0	0	0	0	0	0	0	0	0	0	0	0	0
Bacteria/Proteobacteria/Deltaproteobacteria/Syntrophobacterales/Syntrophaceae/Syntrophus	67	0	0	0	0	0	61	0	0	0	36	0	82	43	60	0	0	33	53	40	47	34	47	0	0	33	42	60	0	0	0	0	0	0	0	37	50	67	0	0	48	0	52	46	50
Bacteria/Proteobacteria/Deltaproteobacteria/Syntrophobacterales/Syntrophaceae/uncultured	0	0	0	0	0	0	0	0	0	0	0	0	0	0	0	0	0	0	0	0	0	0	0	0	0	0	0	0	0	0	0	0	0	0	0	0	0	0	0	0	0	0	0	0	0
Bacteria/Proteobacteria/Deltaproteobacteria/Syntrophobacterales/Syntrophobacteraceae/Desulfacinum	0	0	0	0	0	0	0	0	0	0	0	0	0	0	0	0	0	0	0	0	0	0	0	0	0	0	0	0	0	0	0	0	0	0	0	0	0	0	0	0	0	0	0	0	0
Bacteria/Proteobacteria/Deltaproteobacteria/Syntrophobacterales/Syntrophobacteraceae/Desulforhabdus	0	0	0	0	0	0	0	0	0	0	0	0	0	0	0	0	0	0	0	0	0	0	0	0	0	0	0	0	0	0	0	0	0	0	0	0	0	0	0	0	0	0	0	0	0
Bacteria/Proteobacteria/Deltaproteobacteria/Syntrophobacterales/Syntrophobacteraceae/Desulfovirga	0	0	0	0	0	0	0	0	0	0	0	0	0	0	0	0	0	0	0	0	0	0	0	0	0	0	0	0	0	0	0	0	0	0	0	0	0	0	0	0	0	0	0	0	0
Bacteria/Proteobacteria/Deltaproteobacteria/Syntrophobacterales/Syntrophobacteraceae/Syntrophobacter	0	0	0	0	0	0	0	0	0	0	0	0	0	0	0	0	0	0	0	0	0	0	0	0	0	0	0	0	0	0	0	0	0	0	0	0	0	0	0	0	0	0	0	0	0
Bacteria/Proteobacteria/Deltaproteobacteria/Syntrophobacterales/Syntrophobacteraceae/Thermodesulforhabdus	0	0	0	0	0	0	0	0	0	0	0	0	0	0	0	0	0	0	0	0	0	0	0	0	0	0	0	0	0	0	0	0	0	0	0	0	0	0	0	0	0	0	0	0	0
Bacteria/Proteobacteria/Deltaproteobacteria/Syntrophobacterales/Syntrophobacteraceae/uncultured	0	0	0	0	0	0	0	0	0	18	15	23	0	0	0	0	0	0	36	29	29	0	0	0	0	0	0	0	0	0	0	0	0	40	25	38	0	0	0	0	0	0	35	19	44
Bacteria/Proteobacteria/Deltaproteobacteria/Thermodesulfobacteriales/Thermodesulfobacteriaceae/Caldimicrobium	0	0	0	0	0	0	0	0	0	0	0	0	0	0	0	0	0	0	0	0	0	0	0	0	0	0	0	0	0	0	0	0	0	0	0	0	0	0	0	0	0	0	0	0	0
Bacteria/Proteobacteria/Deltaproteobacteria/Thermodesulfobacteriales/Thermodesulfobacteriaceae/Thermodesulfatator	0	0	0	0	0	0	0	0	0	0	0	0	0	0	0	0	0	0	0	0	0	0	0	0	0	0	0	0	0	0	0	0	0	0	0	0	0	0	0	0	0	0	0	0	0
Bacteria/Proteobacteria/Deltaproteobacteria/Thermodesulfobacteriales/Thermodesulfobacteriaceae/Thermodesulfobacterium	0	0	0	0	0	0	0	0	0	0	0	0	0	0	0	0	0	0	0	0	0	0	0	0	0	0	0	0	0	0	0	0	0	0	0	0	0	0	0	0	0	0	0	0	0
Bacteria/Proteobacteria/Deltaproteobacteria/Thermodesulfobacteriales/Thermodesulfobacteriaceae/uncultured	0	0	0	0	0	0	0	0	0	0	0	0	0	0	0	0	0	0	0	0	0	0	0	0	0	0	0	0	0	0	0	0	0	0	0	0	0	0	0	0	0	0	0	0	0
Bacteria/Proteobacteria/Gammaproteobacteria/Acidiferrobacterales/Acidiferrobacteraceae/Acidiferrobacter	0	0	0	0	0	0	0	0	0	0	0	0	0	0	0	0	0	0	0	0	0	0	0	0	0	0	0	0	0	0	0	0	0	0	0	0	0	0	0	0	0	0	0	0	0
Bacteria/Proteobacteria/Gammaproteobacteria/Acidiferrobacterales/Acidiferrobacteraceae/Sulfurifustis	30	0	0	26	0	0	127	62	85	68	78	71	25	30	35	35	41	26	106	88	72	0	0	0	0	0	0	43	30	34	105	84	88	243	145	101	54	37	24	73	62	54	176	192	196
Bacteria/Proteobacteria/Gammaproteobacteria/Acidiferrobacterales/Acidiferrobacteraceae/uncultured	0	0	0	0	0	0	0	0	0	0	0	0	0	0	0	0	0	0	0	0	0	0	0	0	0	0	0	0	0	0	0	0	0	0	0	0	0	0	0	0	0	0	0	0	0
Bacteria/Proteobacteria/Gammaproteobacteria/Acidithiobacillales/Acidithiobacillaceae/9M32	0	0	0	0	0	0	0	0	0	0	0	0	0	0	0	0	0	0	0	0	0	0	0	0	0	0	0	0	0	0	0	0	0	0	0	0	0	0	0	0	0	0	0	0	0
Bacteria/Proteobacteria/Gammaproteobacteria/Acidithiobacillales/Acidithiobacillaceae/Acidithiobacillus	0	0	0	0	0	0	0	0	0	0	0	0	0	0	0	0	0	0	0	0	0	0	0	0	0	0	0	0	0	0	0	0	0	0	0	0	0	0	0	0	0	0	0	0	0
Bacteria/Proteobacteria/Gammaproteobacteria/Acidithiobacillales/Acidithiobacillaceae/KCM-B-112	0	0	0	0	0	0	0	0	0	0	0	0	0	0	0	0	0	0	0	0	0	0	0	0	0	0	0	0	0	0	0	0	0	0	0	0	0	0	0	0	0	0	0	0	0
Bacteria/Proteobacteria/Gammaproteobacteria/Acidithiobacillales/Acidithiobacillaceae/RCP1-48	0	0	0	0	0	0	0	0	0	0	0	0	0	0	0	0	0	0	0	0	0	0	0	0	0	0	0	0	0	0	0	0	0	0	0	0	0	0	0	0	0	0	0	0	0
[truncated: 715 more rows]

## Sheet: Data S5
Prokarotic taxonomy, all metagenome sequences [NCBI RefSeq database]. Values show raw sequence counts	2018 DNA 7 A	2018 DNA 7 B	2018 DNA 7 C	2018 DNA 10 A	2018 DNA 10 B	2018 DNA 10 C	2018 DNA 11 A	2018 DNA 11 B	2018 DNA 11 C	2018 DNA 12 A	2018 DNA 12 B	2018 DNA 12 C	2018 DNA 13 A	2018 DNA 13 B	2018 DNA 13 C	2018 DNA 15 A	2018 DNA 15 B	2018 DNA 15 C	2018 DNA 16 A	2018 DNA 16 B	2018 DNA 16 C	2017 DNA 5 A	2017 DNA 5 B	2017 DNA 5 C	2017 DNA 7 A	2017 DNA 7 B	2017 DNA 7 C	2017 DNA 10 A	2017 DNA 10 B	2017 DNA 10 C	2017 DNA 11 A	2017 DNA 11 B	2017 DNA 11 C	2017 DNA 12 A	2017 DNA 12 B	2017 DNA 12 C	2017 DNA 13 A	2017 DNA 13 B	2017 DNA 13 C	2017 DNA 15 A	2017 DNA 15 B	2017 DNA 15 C	2017 DNA 16 A	2017 DNA 16 B	2017 DNA 16 C
Archaea/Candidatus Korarchaeota/Candidatus Korarchaeum	599	292	220	262	190	324	768	407	494	310	340	308	34	30	40	359	414	0	453	523	446	254	332	333	319	359	357	497	15	24	335	16	23	676	538	575	435	420	425	25	381	382	487	566	516
Archaea/Candidatus Micrarchaeota/Candidatus Mancarchaeum	2220	981	947	969	1045	1405	2081	1659	1738	1678	1662	2612	3410	2793	3049	1136	1116	0	2064	1653	1876	1045	1659	1248	1136	1473	1317	2186	1164	2048	1136	1146	1023	911	1390	817	2069	2519	2404	731	962	1220	869	1383	1466
Archaea/Crenarchaeota/Thermoprotei/Acidilobales/Acidilobaceae/Acidilobus	185	83	82	68	56	95	217	99	139	101	97	114	112	132	147	97	106	54	142	141	152	76	89	101	67	100	107	136	73	118	111	80	84	255	156	171	104	125	131	126	117	141	164	194	157
Archaea/Crenarchaeota/Thermoprotei/Acidilobales/Caldisphaeraceae/Caldisphaera	228	103	117	77	47	58	82	50	45	40	33	58	151	140	140	112	75	52	55	56	48	67	60	53	65	64	65	95	34	63	53	46	33	66	68	60	63	62	56	39	47	58	62	51	77
Archaea/Crenarchaeota/Thermoprotei/Desulfurococcales/Desulfurococcaceae/Desulfurococcus	66	44	33	24	31	37	63	37	53	46	31	41	66	52	67	41	44	42	43	50	42	39	42	56	51	42	46	57	28	59	47	28	33	78	58	66	68	57	55	39	42	55	60	54	56
Archaea/Crenarchaeota/Thermoprotei/Desulfurococcales/Desulfurococcaceae/Ignicoccus	136	63	57	58	45	73	121	93	69	68	64	52	106	89	126	76	88	50	81	78	90	60	84	76	81	95	74	108	64	86	75	39	57	120	88	103	92	106	119	90	66	87	104	97	130
Archaea/Crenarchaeota/Thermoprotei/Desulfurococcales/Desulfurococcaceae/Staphylothermus	77	52	39	34	28	38	42	23	38	27	27	32	73	81	64	33	50	20	50	38	44	57	51	45	35	73	57	66	39	52	39	31	35	46	62	49	43	67	54	47	31	50	47	56	69
Archaea/Crenarchaeota/Thermoprotei/Desulfurococcales/Desulfurococcaceae/Thermogladius	100	46	52	47	40	59	113	50	65	45	44	46	64	114	78	59	78	56	63	50	68	38	43	48	60	59	36	79	42	63	54	38	56	88	63	76	80	67	90	54	41	50	69	73	90
Archaea/Crenarchaeota/Thermoprotei/Desulfurococcales/Desulfurococcaceae/Thermosphaera	20	11	11	0	0	16	18	16	18	12	14	0	15	22	27	13	11	0	21	16	12	12	20	15	17	17	16	18	12	29	15	26	17	23	27	13	19	23	18	10	0	0	17	19	24
Archaea/Crenarchaeota/Thermoprotei/Desulfurococcales/Pyrodictiaceae/Hyperthermus	45	17	14	16	13	28	42	17	28	25	25	25	32	26	27	24	28	12	25	24	36	21	30	18	19	26	31	22	14	34	19	24	28	44	40	42	22	21	34	27	25	19	28	47	39
Archaea/Crenarchaeota/Thermoprotei/Desulfurococcales/Pyrodictiaceae/Pyrodictium	51	35	30	23	24	38	76	43	60	33	40	48	54	52	45	44	31	27	73	61	58	30	31	21	33	40	48	55	38	54	44	38	33	76	67	62	39	46	48	49	45	46	62	75	77
Archaea/Crenarchaeota/Thermoprotei/Desulfurococcales/Pyrodictiaceae/Pyrolobus	125	52	41	37	35	50	135	72	100	74	82	67	57	76	86	61	81	49	72	95	112	0	60	51	42	59	70	96	59	57	72	70	62	134	72	134	63	70	111	81	61	86	99	118	123
Archaea/Crenarchaeota/Thermoprotei/Sulfolobales/Sulfolobaceae/Acidianus	212	101	105	74	68	100	123	83	109	85	72	86	181	179	206	74	94	55	105	84	84	106	148	112	117	165	136	128	82	138	74	63	66	121	93	88	95	141	150	73	76	95	123	117	130
Archaea/Crenarchaeota/Thermoprotei/Sulfolobales/Sulfolobaceae/Metallosphaera	116	51	57	58	28	70	95	46	66	58	49	50	135	79	135	65	82	41	72	42	59	40	67	71	57	68	51	88	53	90	47	42	46	96	75	81	74	77	80	42	67	71	77	72	85
Archaea/Crenarchaeota/Thermoprotei/Sulfolobales/Sulfolobaceae/Saccharolobus	66	25	25	22	12	24	38	16	20	36	23	37	59	53	52	25	34	28	29	30	28	37	47	42	47	30	38	51	30	38	23	29	24	30	33	30	28	51	47	34	24	24	56	33	46
Archaea/Crenarchaeota/Thermoprotei/Sulfolobales/Sulfolobaceae/Sulfodiicoccus	67	42	20	24	14	32	60	46	38	37	46	38	60	40	50	30	37	19	51	58	47	36	40	59	39	38	52	57	18	42	42	37	34	90	55	47	50	36	50	44	49	46	51	72	60
Archaea/Crenarchaeota/Thermoprotei/Sulfolobales/Sulfolobaceae/Sulfolobus	209	95	93	82	75	103	141	103	100	69	89	94	184	168	208	88	99	62	103	99	117	105	153	131	125	146	116	158	65	129	107	91	105	144	115	136	114	158	126	71	101	122	145	162	131
Archaea/Crenarchaeota/Thermoprotei/Sulfolobales/Sulfolobaceae/Sulfurisphaera	117	67	53	48	42	54	84	61	74	31	37	37	125	104	116	53	56	41	52	62	54	59	86	106	63	85	80	104	46	78	57	37	46	65	66	63	70	86	96	66	59	47	56	85	61
[truncated: 1,225 more rows]

## Sheet: Data S6
GO category 1	GO category 2	GO category 3	GO category 4	InterPro ID	Protein (2018 RNA data)	CPM 7 A	CPM 7 B	CPM 7 C	CPM 10 A	CPM 10 B	CPM 10 C	CPM 11 A	CPM 11 B	CPM 11 C	CPM 12 A	CPM 12 B	CPM 12 C	CPM 13 A	CPM 13 B	CPM 13 C	CPM 15 A	CPM 15 B	CPM 15 C	CPM 16 A	CPM 16 B	CPM 16 C	counts 7 A	counts 7 B	counts 7 C	counts 10 A	counts 10 B	counts 10 C	counts 11 A	counts 11 B	counts 11 C	counts 12 A	counts 12 B	counts 12 C	counts 13 A	counts 13 B	counts 13 C	counts 15 A	counts 15 B	counts 15 C	counts 16 A	counts 16 B	counts 16 C
[truncated: 6,532 more rows]

[truncated: 2 more sheets: Data S7, Data S8]
